# Supplementary material for: MnoSR removal in Mycobacterium smegmatis triggers broad transcriptional response to 1,3-propanediol and glucose as sole carbon sources
Source: Front Cell Infect Microbiol. 2024 Jul 24;14:1427829. doi: 10.3389/fcimb.2024.1427829 (PMC11303327; doi:10.3389/fcimb.2024.1427829)
Supplement: Supplementary file 2 [file Table_1.xlsx]

## Sheet: WT vs MUT 2% glucose
Supplementary Table
total RNA sequencing
gene	Log2-transformed Fold Change (Log2FC) values for expression in MSMEG6238/6236 double mutant strain versus wild-type control	False Discovery Rate (FDR)	Log2-transformed Average Expression	p value ↓	raw read count						CPM-transformed values
					WT_1	WT_2	WT_3	MUT_1	MUT_2	MUT_3	WT_1	WT_2	WT_3	MUT_1	MUT_2	MUT_3	annotation
MSMEG_1605	3.43488	4.95589e-16	9.60559	6.37248e-19	400	394	621	4902	4050	5195	167.088	136.39	133.913	1275.53	1056.89	1361.52	K02039 phosphate transport system protein
MSMEG_2343	3.91126	4.95589e-16	8.89839	6.99764e-19	235	208	336	3189	4018	3587	98.164	72.003	72.455	829.797	1048.54	940.094	methylesterase
MSMEG_3935	4.1277	4.95589e-16	9.12842	4.86611e-19	600	481	721	9164	9860	10154	250.632	166.507	155.477	2384.53	2573.08	2661.2	conserved hypothetical protein
MSMEG_3942	4.4795	4.95589e-16	9.47777	5.95047e-19	846	532	977	15497	15633	16617	353.392	184.161	210.681	4032.41	4079.6	4355.04	K07028 uncharacterized protein
MSMEG_3952	3.70028	4.95589e-16	8.57111	5.19851e-19	195	179	316	2593	3127	2471	81.456	61.964	68.142	674.714	816.025	647.609	conserved hypothetical protein
MSMEG_5136	3.71806	4.95589e-16	10.1535	6.63563e-19	996	805	1411	13234	12161	13294	416.05	278.665	304.269	3443.57	3173.55	3484.14	helix-turn-helix motif
MSMEG_5243	3.36457	4.95589e-16	9.02878	4.18472e-19	511	485	800	6024	5101	5877	213.455	167.892	172.513	1567.48	1331.16	1540.27	K07005 uncharacterized protein
MSMEG_5244	3.35946	4.95589e-16	7.10573	3.46212e-19	615	555	1008	6668	6769	6880	256.898	192.123	217.366	1735.05	1766.44	1803.13	K07695 two-component system, NarL family, response regulator DevR
MSMEG_5733	3.75704	4.95589e-16	10.6233	3.31919e-19	1200	1040	1626	15758	15389	17124	501.265	360.015	350.632	4100.33	4015.93	4487.92	universal stress protein family protein
MSMEG_3946	4.1742	5.29715e-16	8.91875	8.31055e-19	457	308	580	7437	7403	7216	190.898	106.62	125.072	1935.15	1931.89	1891.19	probable conserved transmembrane protein
MSMEG_1772	3.33727	8.67255e-16	8.91663	1.55582e-18	232	213	390	2599	2370	2687	96.911	73.734	84.1	676.276	618.478	704.219	conserved hypothetical protein
MSMEG_5135	3.63159	8.67255e-16	7.32731	1.63274e-18	210	175	337	2762	2614	2702	87.721	60.579	72.671	718.689	682.152	708.15	hypothetical protein
MSMEG_3933	4.43642	9.83813e-16	6.94775	2.00652e-18	195	132	275	3604	4132	3929	81.456	45.694	59.301	937.783	1078.29	1029.73	K00635 diacylglycerol O-acyltransferase / wax synthase [EC:2.3.1.20 2.3.1.75]
MSMEG_5245	3.85117	1.00443e-15	8.48852	2.20615e-18	593	479	877	8287	8548	8796	247.708	165.815	189.117	2156.33	2230.7	2305.29	universal stress protein family protein
MSMEG_3948	4.48066	1.30269e-15	7.05997	3.06564e-18	125	99	151	2282	2808	2536	52.215	34.271	32.562	593.79	732.779	664.644	K00635 diacylglycerol O-acyltransferase / wax synthase [EC:2.3.1.20 2.3.1.75]
MSMEG_3955	4.93926	1.5774e-15	7.95537	3.95958e-18	134	80	160	3093	3602	3477	55.975	27.693	34.503	804.818	939.982	911.265	conserved hypothetical protein
MSMEG_5246	2.6288	2.09311e-15	10.227	5.58251e-18	1986	2058	3429	14230	13285	14653	829.593	712.414	739.432	3702.73	3466.87	3840.31	conserved hypothetical protein
MSMEG_3941	3.62176	2.20872e-15	6.44256	6.23736e-18	170	148	288	2017	2618	2121	71.012	51.233	62.105	524.836	683.196	555.879	K07682 two-component system, NarL family, sensor histidine kinase DevS [EC:2.7.13.3]
MSMEG_5732	3.58723	2.3502e-15	6.75328	7.00563e-18	373	316	601	4559	4846	4644	155.81	109.389	129.6	1186.28	1264.62	1217.12	monooxygenase
MSMEG_2344	4.13094	2.81214e-15	8.11029	9.32837e-18	147	91	156	2030	2035	2090	61.405	31.501	33.64	528.218	531.056	547.755	K09879 carotenoid phi-ring synthase / carotenoid chi-ring synthase [EC:1.3.99.39 1.3.99.40]
MSMEG_3943	3.21418	2.81214e-15	6.12945	9.0439e-18	120	130	218	1322	1342	1276	50.126	45.002	47.01	343.993	350.21	334.419	conserved hypothetical protein
MSMEG_3944	3.11052	2.81214e-15	5.45831	9.70616e-18	197	183	284	1761	1762	1740	82.291	63.349	61.242	458.223	459.813	456.026	K07695 two-component system, NarL family, response regulator DevR
MSMEG_5343	4.0066	3.1298e-15	10.373	1.12936e-17	399	299	506	6529	4892	6481	166.67	103.504	109.114	1698.89	1276.62	1698.56	conserved hypothetical protein
MSMEG_3945	3.98165	3.33494e-15	7.76849	1.2557e-17	327	262	405	4344	5311	4868	136.595	90.696	87.334	1130.34	1385.96	1275.82	universal stress protein family protein
MSMEG_3950	3.42696	4.78578e-15	9.1021	1.87707e-17	561	618	1002	6572	7958	6914	234.341	213.932	216.072	1710.08	2076.73	1812.05	universal stress protein family protein
MSMEG_5241	3.14514	4.87526e-15	7.97325	1.98865e-17	530	475	886	4753	5437	4994	221.392	164.43	191.058	1236.76	1418.85	1308.85	K07682 two-component system, NarL family, sensor histidine kinase DevS [EC:2.7.13.3]
MSMEG_1767	4.10671	5.11377e-15	8.64128	2.2464e-17	85	57	120	1354	1219	1436	35.506	19.732	25.877	352.319	318.111	376.352	conserved hypothetical protein
MSMEG_5342	4.07768	5.11377e-15	9.73956	2.22792e-17	184	136	241	3013	2350	3308	76.861	47.079	51.969	784.001	613.258	866.973	conserved hypothetical protein
MSMEG_3936	4.74039	5.16425e-15	4.61285	2.3496e-17	50	34	48	879	1370	923	20.886	11.77	10.351	228.721	357.517	241.903	universal stress protein family protein
MSMEG_3926	3.92818	5.65964e-15	4.64279	2.66378e-17	93	79	133	1180	1698	1371	38.848	27.347	28.68	307.043	443.112	359.317	cation-transporting ATPase Pma1
MSMEG_1771	3.78325	6.03743e-15	10.2068	2.93631e-17	323	267	400	4419	3440	4865	134.924	92.427	86.256	1149.85	897.706	1275.04	K02493 release factor glutamine methyltransferase [EC:2.1.1.297]
MSMEG_1782	4.01851	6.07872e-15	10.6841	3.05176e-17	286	231	429	5392	3416	5426	119.468	79.965	92.51	1403.03	891.443	1422.07	oxidoreductase, short chain dehydrogenase/reductase family protein
MSMEG_5242	3.61819	6.37359e-15	8.55668	3.29979e-17	454	431	786	5891	6530	6195	189.645	149.198	169.494	1532.87	1704.08	1623.61	K00635 diacylglycerol O-acyltransferase / wax synthase [EC:2.3.1.20 2.3.1.75]
MSMEG_1790	3.90225	6.39598e-15	10.4809	3.41172e-17	296	242	381	4548	3572	4610	123.645	83.773	82.159	1183.42	932.153	1208.21	conserved hypothetical protein
MSMEG_1112	3.40579	7.12807e-15	9.48667	3.96232e-17	109	127	228	1674	1209	1577	45.532	43.963	49.166	435.585	315.502	413.306	K01681 aconitate hydratase [EC:4.2.1.3]
MSMEG_2345	3.99099	7.12807e-15	6.82743	4.02589e-17	50	40	74	835	656	871	20.886	13.847	15.957	217.272	171.19	228.275	pseudogene
MSMEG_2347	3.6944	7.70553e-15	10.0634	4.47293e-17	303	235	400	4366	2860	4071	126.569	81.35	86.256	1136.06	746.349	1066.94	K10027 phytoene desaturase [EC:1.3.99.26 1.3.99.28 1.3.99.29 1.3.99.31]
MSMEG_2337	3.45546	7.90346e-15	8.35066	4.71182e-17	104	93	179	1333	1090	1301	43.443	32.194	38.6	346.855	284.448	340.971	K01823 isopentenyl-diphosphate Delta-isomerase [EC:5.3.3.2]
MSMEG_6467	3.66742	8.47568e-15	10.9447	5.18593e-17	1542	1167	1933	19525	14577	20715	644.125	403.978	416.834	5080.52	3804.03	5429.06	K04047 starvation-inducible DNA-binding protein
MSMEG_2607	-4.32482	8.59837e-15	4.46436	5.6657e-17	820	1380	1988	58	44	91	342.531	477.712	428.694	15.092	11.482	23.85	K02007 cobalt/nickel transport system permease protein
MSMEG_3255	3.37495	8.59837e-15	11.7592	5.5419e-17	518	486	770	5866	4874	6298	216.379	168.238	166.043	1526.37	1271.92	1650.6	DoxX subfamily protein, putative
MSMEG_3928	4.51362	8.59837e-15	3.72508	5.49132e-17	33	25	35	583	746	583	13.785	8.654	7.547	151.7	194.677	152.795	[NiFe] hydrogenase, alpha subunit, putative
MSMEG_1076	3.49481	1.11783e-14	9.62063	7.56318e-17	688	675	1103	9221	7052	9407	287.392	233.664	237.852	2399.36	1840.3	2465.42	K19777 acid stress chaperone HdeA
MSMEG_1768	3.8599	1.11783e-14	8.86273	7.71642e-17	126	87	160	1767	1350	1776	52.633	30.117	34.503	459.784	352.297	465.461	conserved hypothetical protein
MSMEG_3141	3.61892	1.12047e-14	10.834	7.91044e-17	271	182	348	3258	2421	3295	113.202	63.003	75.043	847.752	631.787	863.566	conserved domain protein
MSMEG_2608	-3.9199	1.15792e-14	2.75275	8.35652e-17	266	370	610	24	23	25	111.114	128.082	131.541	6.245	6.002	6.552	K02009 cobalt/nickel transport protein
MSMEG_6664	3.80348	1.26761e-14	8.48177	9.34697e-17	200	176	274	3103	2195	3142	83.544	60.926	59.086	807.42	572.809	823.467	methylenetetrahydrofolate reductase family protein, putative
MSMEG_1802	4.18096	1.30871e-14	10.5632	1.04713e-16	476	358	567	8191	6730	8630	198.835	123.928	122.268	2131.35	1756.27	2261.78	ChaB protein
MSMEG_3949	4.32336	1.30871e-14	4.00927	1.01027e-16	22	20	30	360	502	467	9.19	6.923	6.469	93.674	131.002	122.393	hypothetical protein
MSMEG_5189	3.49963	1.30871e-14	10.8015	1.00443e-16	798	675	1150	10241	6933	10486	333.341	233.664	247.987	2664.77	1809.24	2748.21	oxidoreductase
MSMEG_6606	4.17185	1.30871e-14	5.639	1.04093e-16	59	39	90	952	1003	1033	24.646	13.501	19.408	247.716	261.744	270.732	hypothetical protein
MSMEG_1361	2.75625	1.35442e-14	9.20899	1.10495e-16	113	142	197	930	892	972	47.202	49.156	42.481	241.992	232.777	254.745	alpha-mannosidase
MSMEG_3775	2.97711	1.37465e-14	3.77335	1.14303e-16	132	140	226	1053	1400	1143	55.139	48.464	48.735	273.997	365.345	299.562	K00620 glutamate N-acetyltransferase / amino-acid N-acetyltransferase [EC:2.3.1.35 2.3.1.1]
MSMEG_2958	3.61118	1.42591e-14	9.85823	1.23037e-16	114	120	179	1591	1343	1705	47.62	41.54	38.6	413.988	350.471	446.853	conserved hypothetical protein
MSMEG_5078	2.92574	1.42591e-14	10.1555	1.23039e-16	681	639	1128	6336	4602	6167	284.468	221.201	243.243	1648.67	1200.94	1616.27	K00975 glucose-1-phosphate adenylyltransferase [EC:2.7.7.27]
MSMEG_1951	3.85253	1.55246e-14	10.3231	1.41015e-16	603	500	793	9326	7230	8853	251.885	173.084	171.003	2426.68	1886.75	2320.23	conserved domain protein
MSMEG_3289	4.20173	1.55246e-14	11.5394	1.41265e-16	434	281	501	8117	4790	8057	181.291	97.273	108.036	2112.09	1250	2111.61	gp61 protein
MSMEG_6210	3.10875	1.55246e-14	8.47917	1.37489e-16	144	144	243	1473	1199	1515	60.152	49.848	52.401	383.284	312.892	397.057	conserved hypothetical protein
MSMEG_1766	4.07889	1.62426e-14	8.37268	1.50347e-16	70	55	80	1226	836	1088	29.24	19.039	17.251	319.013	218.163	285.147	conserved hypothetical protein
MSMEG_3254	2.73808	1.67027e-14	10.9682	1.63535e-16	488	536	942	3991	3948	3899	203.848	185.546	203.134	1038.48	1030.27	1021.86	RDD family protein, putative
MSMEG_3304	3.58315	1.67027e-14	9.57154	1.59279e-16	95	94	147	1278	1059	1352	39.683	32.54	31.699	332.543	276.358	354.337	K00135 succinate-semialdehyde dehydrogenase / glutarate-semialdehyde dehydrogenase [EC:1.2.1.16]
MSMEG_3940	5.25729	1.67027e-14	4.15504	1.65088e-16	54	18	49	1052	1599	1166	22.557	6.231	10.566	273.737	417.277	305.59	universal stress protein family protein
MSMEG_6615	4.06759	1.67027e-14	8.06332	1.6431e-16	63	44	79	1066	718	1039	26.316	15.231	17.036	277.38	187.37	272.305	hypothetical protein
MSMEG_2752	3.07791	1.91926e-14	11.0829	1.92709e-16	1041	961	1473	10434	7031	10029	434.847	332.668	317.639	2714.99	1834.82	2628.44	K03087 RNA polymerase nonessential primary-like sigma factor
MSMEG_1781	3.80338	1.92822e-14	7.83887	1.99659e-16	99	74	150	1339	1204	1502	41.354	25.616	32.346	348.416	314.197	393.65	hypothetical protein
MSMEG_3673	3.15481	1.92822e-14	9.51676	1.98153e-16	158	143	233	1535	1203	1642	66	49.502	50.244	399.416	313.936	430.341	K00705 4-alpha-glucanotransferase [EC:2.4.1.25]
MSMEG_2346	4.14259	2.09581e-14	7.93245	2.23588e-16	70	42	83	1117	856	1074	29.24	14.539	17.898	290.65	223.383	281.478	K02291 15-cis-phytoene synthase [EC:2.5.1.32]
MSMEG_5400	3.67374	2.09581e-14	9.53689	2.23255e-16	268	202	312	3378	2431	3467	111.949	69.926	67.28	878.976	634.396	908.644	dehydrogenase
MSMEG_5341	4.21781	2.13587e-14	7.42135	2.31213e-16	98	61	142	1692	1469	1771	40.937	21.116	30.621	440.269	383.352	464.15	dipeptidyl aminopeptidase/acylaminoacyl peptidase
MSMEG_0684	3.69673	2.33711e-14	10.7682	2.56664e-16	439	356	687	6296	4810	6449	183.379	123.236	148.145	1638.26	1255.22	1690.18	K11177 xanthine dehydrogenase YagR molybdenum-binding subunit [EC:1.17.1.4]
MSMEG_1769	3.87394	2.48063e-14	8.70723	2.80209e-16	230	161	319	3437	2520	3516	96.076	55.733	68.789	894.328	657.622	921.486	UsfY protein
MSMEG_5014	2.55774	2.48063e-14	10.891	2.78199e-16	2275	3015	4627	18396	16098	18358	950.314	1043.7	997.77	4786.75	4200.95	4811.33	K17686 P-type Cu+ transporter [EC:7.2.2.8]
MSMEG_3934	5.26504	2.51461e-14	8.36759	2.87993e-16	259	92	224	5454	6884	6231	108.19	31.847	48.304	1419.16	1796.46	1633.04	K01007 pyruvate, water dikinase [EC:2.7.9.2]
MSMEG_1779	3.95259	2.54203e-14	5.98694	2.95121e-16	82	58	85	1172	867	1089	34.253	20.078	18.329	304.962	226.253	285.409	hypothetical protein
MSMEG_1777	3.83669	2.58877e-14	10.4694	3.08671e-16	392	301	526	6318	3923	6047	163.746	104.197	113.427	1643.98	1023.75	1584.82	UsfY protein
MSMEG_3939	5.20862	2.58877e-14	6.64548	3.0862e-16	112	48	107	2292	3595	2608	46.785	16.616	23.074	596.392	938.155	683.514	universal stress protein family protein
MSMEG_1774	3.16615	2.67115e-14	8.54132	3.2624e-16	173	158	254	1687	1433	1697	72.266	54.695	54.773	438.968	373.957	444.756	conserved hypothetical protein
MSMEG_1789	3.89031	2.67115e-14	8.77073	3.26875e-16	93	67	115	1324	1031	1326	38.848	23.193	24.799	344.513	269.051	347.523	conserved hypothetical protein
MSMEG_2115	3.50301	2.70901e-14	9.28538	3.35757e-16	132	131	150	1507	1269	1538	55.139	45.348	32.346	392.131	331.16	403.085	conserved hypothetical protein
MSMEG_1098	3.49331	2.87886e-14	6.78376	3.61326e-16	155	115	213	1860	1311	1793	64.747	39.809	45.931	483.983	342.12	469.916	K00666 fatty-acyl-CoA synthase [EC:6.2.1.-]
MSMEG_5605	4.02227	2.96222e-14	9.63106	3.76436e-16	87	68	93	1354	948	1371	36.342	23.539	20.055	352.319	247.391	359.317	K00425 cytochrome bd ubiquinol oxidase subunit I [EC:7.1.1.7]
MSMEG_0670	3.17445	3.57882e-14	8.0879	4.60407e-16	195	197	332	2245	1647	2111	81.456	68.195	71.593	584.163	429.803	553.259	FAD dependent oxidoreductase
MSMEG_3932	5.2465	3.70336e-14	7.89151	4.82239e-16	535	188	402	10751	14069	11745	223.48	65.08	86.688	2797.48	3671.46	3078.17	K13993 HSP20 family protein
MSMEG_1097	3.71088	3.87258e-14	10.0431	5.10349e-16	267	201	367	3753	2430	3984	111.531	69.58	79.14	976.554	634.135	1044.14	glycosyl transferase, group 2 family protein
MSMEG_6212	3.62687	4.0642e-14	8.7606	5.41978e-16	124	98	176	1676	1228	1575	51.797	33.924	37.953	436.105	320.46	412.782	hemerythrin HHE cation binding domain subfamily protein, putative
MSMEG_6507	2.40019	4.4101e-14	9.06755	5.95025e-16	2439	2767	4251	15500	14150	16080	1018.82	957.847	916.689	4033.2	3692.6	4214.31	K01214 isoamylase [EC:3.2.1.68]
MSMEG_1778	3.57136	4.58646e-14	7.555	6.26015e-16	106	98	155	1499	1033	1405	44.278	33.924	33.424	390.049	269.573	368.227	conserved hypothetical protein
MSMEG_5616	4.15	4.77019e-14	3.71161	6.58576e-16	81	50	98	1339	1026	1243	33.835	17.308	21.133	348.416	267.746	325.77	K06996 uncharacterized protein
MSMEG_5496	4.09686	5.96265e-14	7.06694	8.32563e-16	48	35	64	876	603	799	20.051	12.116	13.801	227.941	157.359	209.405	MscS Mechanosensitive ion channel
MSMEG_1173	4.75068	6.43383e-14	2.24554	9.18541e-16	28	15	33	589	600	603	11.696	5.193	7.116	153.261	156.577	158.036	K03892 ArsR family transcriptional regulator
MSMEG_3953	5.15173	6.43383e-14	4.4678	9.12694e-16	43	20	48	879	1618	1002	17.962	6.923	10.351	228.721	422.235	262.608	K00648 3-oxoacyl-[acyl-carrier-protein] synthase III [EC:2.3.1.180]
MSMEG_3954	4.51106	6.52629e-14	4.71749	9.41981e-16	58	29	70	886	1303	937	24.228	10.039	15.095	230.543	340.032	245.572	trehalose 6-phosphate phosphorylase
MSMEG_5401	3.91071	6.67356e-14	9.35887	9.73707e-16	110	60	133	1469	1006	1573	45.949	20.77	28.68	382.243	262.527	412.258	conserved hypothetical protein
MSMEG_5542	2.48395	7.59076e-14	10.85	1.11944e-15	663	629	1248	4733	3764	4292	276.949	217.74	269.12	1231.56	982.257	1124.86	K07729 putative transcriptional regulator
MSMEG_3418	3.19332	9.55348e-14	9.26907	1.42388e-15	478	487	666	5092	3805	5081	199.67	168.584	143.617	1324.97	992.957	1331.65	conserved hypothetical protein
MSMEG_3774	2.6197	1.03437e-13	3.64833	1.55789e-15	139	165	251	868	1233	1039	58.063	57.118	54.126	225.859	321.765	272.305	K00930 acetylglutamate kinase [EC:2.7.2.8]
MSMEG_3185	2.5236	1.16422e-13	10.8779	1.80824e-15	1343	1524	2477	9701	8127	10232	560.999	527.56	534.142	2524.26	2120.83	2681.64	pseudogene
MSMEG_3931	3.95272	1.16422e-13	6.5611	1.79935e-15	411	273	515	4728	7320	5112	171.683	94.504	111.055	1230.26	1910.23	1339.77	[NiFe] hydrogenase, beta subunit, putative
MSMEG_5722	3.87469	1.16422e-13	8.79825	1.78929e-15	163	103	189	2335	1459	2314	68.088	35.655	40.756	607.581	380.742	606.462	conserved hypothetical protein
MSMEG_6616	3.88593	1.35009e-13	10.6302	2.11812e-15	222	153	259	3407	1952	3432	92.734	52.964	55.851	886.522	509.396	899.471	S-(hydroxymethyl)glutathione dehydrogenase
MSMEG_6213	3.74709	1.35104e-13	10.8253	2.1408e-15	399	317	482	5467	4355	5107	166.67	109.735	103.939	1422.55	1136.48	1338.46	K07217 manganese catalase [EC:1.11.1.6]
MSMEG_1794	3.66633	1.36455e-13	10.0638	2.18362e-15	218	155	289	3009	1745	3096	91.063	53.656	62.32	782.96	455.377	811.411	dehydrogenase
MSMEG_1950	3.86678	1.44752e-13	9.98058	2.33911e-15	371	345	539	6600	4341	6211	154.974	119.428	116.23	1717.36	1132.83	1627.8	conserved hypothetical protein
MSMEG_1803	2.23789	1.45451e-13	10.1618	2.37322e-15	718	790	1362	4247	3786	4228	299.923	273.473	293.703	1105.1	987.998	1108.09	K04757 serine/threonine-protein kinase RsbW [EC:2.7.11.1]
MSMEG_0685	3.77724	1.46735e-13	8.16513	2.41719e-15	68	57	75	910	680	897	28.405	19.732	16.173	236.788	177.453	235.089	K11178 xanthine dehydrogenase YagS FAD-binding subunit [EC:1.17.1.4]
MSMEG_3184	2.45772	1.47349e-13	9.28123	2.4559e-15	691	845	1322	4780	4396	5105	288.645	292.512	285.077	1243.79	1147.18	1337.94	K01236 maltooligosyltrehalose trehalohydrolase [EC:3.2.1.141]
MSMEG_3419	3.71439	1.47349e-13	9.52572	2.47354e-15	370	271	501	5118	3617	5079	154.557	93.812	108.036	1331.73	943.896	1331.12	hypothetical protein
MSMEG_5399	3.57716	1.53715e-13	4.78246	2.60452e-15	38	26	51	438	394	393	15.873	9	10.998	113.97	102.819	102.999	K03654 ATP-dependent DNA helicase RecQ [EC:5.6.2.4]
MSMEG_5328	2.56013	1.55371e-13	8.81882	2.65695e-15	596	665	1147	4619	3848	4403	248.961	230.202	247.34	1201.89	1004.18	1153.95	conserved hypothetical protein
MSMEG_6610	4.14611	1.57396e-13	6.57464	2.71627e-15	61	48	75	1151	759	1064	25.481	16.616	16.173	299.497	198.069	278.857	protein of unknown function DUF58, putative
MSMEG_3536	3.1751	1.71232e-13	9.58173	2.98192e-15	119	131	184	1388	946	1311	49.709	45.348	39.678	361.166	246.869	343.592	sugar transport protein
MSMEG_6663	3.49606	1.72649e-13	7.33936	3.03368e-15	110	80	149	1374	903	1206	45.949	27.693	32.13	357.523	235.648	316.073	C5-O-methyltransferase
MSMEG_1775	3.4832	1.73197e-13	8.63782	3.07048e-15	83	78	106	972	731	1046	34.671	27.001	22.858	252.92	190.763	274.139	cytochrome P450 monooxygenase
MSMEG_2927	2.71183	1.83875e-13	6.3878	3.28863e-15	265	248	454	2100	1675	1990	110.696	85.85	97.901	546.433	437.11	521.546	K05846 osmoprotectant transport system permease protein
MSMEG_3232	2.51012	2.05312e-13	5.17163	3.70424e-15	105	120	229	847	693	776	43.861	41.54	49.382	220.395	180.846	203.377	K00426 cytochrome bd ubiquinol oxidase subunit II [EC:7.1.1.7]
MSMEG_2913	3.69168	2.27982e-13	9.11689	4.14902e-15	73	56	109	1081	690	1036	30.494	19.385	23.505	281.283	180.063	271.519	hydrolase
MSMEG_5543	3.24132	2.33946e-13	11.6615	4.29427e-15	601	511	887	6699	4437	6449	251.05	176.892	191.273	1743.12	1157.88	1690.18	hypothetical protein
MSMEG_3541	3.56569	2.34723e-13	6.49443	4.34536e-15	111	76	123	1071	1018	1205	46.367	26.309	26.524	278.681	265.658	315.811	cytochrome C biogenesis protein transmembrane region
MSMEG_2035	2.4673	2.482e-13	9.29573	4.63379e-15	194	220	340	1334	1089	1408	81.038	76.157	73.318	347.115	284.187	369.014	K00274 monoamine oxidase [EC:1.4.3.4]
MSMEG_1787	3.22188	2.7665e-13	9.08654	5.20834e-15	80	68	112	908	547	788	33.418	23.539	24.152	236.267	142.746	206.522	RsbW protein
MSMEG_6607	3.21597	2.844e-13	5.96268	5.39886e-15	79	83	123	811	795	809	33	28.732	26.524	211.027	207.464	212.026	hypothetical protein
MSMEG_1773	3.64399	2.92158e-13	9.3235	5.59197e-15	246	165	272	3213	1880	2866	102.759	57.118	58.654	836.042	490.607	751.132	conserved hypothetical protein
MSMEG_3776	3.01681	3.36603e-13	3.429	6.53214e-15	103	110	203	954	1230	875	43.025	38.079	43.775	248.237	320.982	229.323	K00145 N-acetyl-gamma-glutamyl-phosphate reductase [EC:1.2.1.38]
MSMEG_6767	3.9784	3.36603e-13	9.95116	6.54829e-15	448	266	492	5876	5321	6027	187.139	92.081	106.095	1528.97	1388.57	1579.58	mycocerosic acid synthase
MSMEG_1558	2.64787	3.53624e-13	7.24296	6.93489e-15	590	664	1228	4576	4606	4729	246.455	229.856	264.807	1190.7	1201.99	1239.39	conserved hypothetical protein
MSMEG_5606	4.02176	3.72795e-13	8.12155	7.36935e-15	34	27	32	492	394	460	14.202	9.347	6.901	128.021	102.819	120.558	K00426 cytochrome bd ubiquinol oxidase subunit II [EC:7.1.1.7]
MSMEG_6727	3.26271	3.81552e-13	9.58042	7.6023e-15	314	295	563	3673	2894	3634	131.164	102.12	121.406	955.737	755.221	952.412	amino acid permease-associated region
MSMEG_2926	2.88486	3.89814e-13	7.02871	7.82808e-15	310	312	577	2948	2310	2771	129.493	108.004	124.425	767.088	602.82	726.234	K05847 osmoprotectant transport system ATP-binding protein [EC:7.6.2.9]
MSMEG_5188	3.52504	3.96474e-13	7.75382	8.02404e-15	142	95	197	1724	1129	1676	59.316	32.886	42.481	448.595	294.625	439.252	K07052 CAAX protease family protein
MSMEG_6466	2.97686	4.05005e-13	6.75676	8.26022e-15	129	114	188	1146	826	1152	53.886	39.463	40.54	298.196	215.554	301.92	K06188 aquaporin Z
MSMEG_5721	2.26834	4.30174e-13	7.80854	8.84105e-15	436	510	743	2566	2308	2606	182.126	176.546	160.221	667.689	602.298	682.99	K00626 acetyl-CoA C-acetyltransferase [EC:2.3.1.9]
MSMEG_5402	3.8214	4.55959e-13	9.33932	9.44251e-15	117	85	162	1930	963	1960	48.873	29.424	34.934	502.198	251.305	513.684	dehydrogenase DhgA
MSMEG_2924	2.67189	4.9996e-13	5.41436	1.04322e-14	134	144	248	1146	893	1011	55.975	49.848	53.479	298.196	233.038	264.967	K05845 osmoprotectant transport system substrate-binding protein
MSMEG_6765	4.6728	5.19359e-13	6.39203	1.09184e-14	40	30	37	724	963	744	16.709	10.385	7.979	188.389	251.305	194.99	K01992 ABC-2 type transport system permease protein
MSMEG_3947	4.4368	5.20545e-13	7.57525	1.1025e-14	256	136	226	3588	4173	4163	106.936	47.079	48.735	933.62	1088.99	1091.05	K16370 6-phosphofructokinase 2 [EC:2.7.1.11]
MSMEG_1057	3.49506	5.4044e-13	8.32983	1.15312e-14	123	80	164	1412	991	1315	51.38	27.693	35.365	367.411	258.612	344.64	K01823 isopentenyl-diphosphate Delta-isomerase [EC:5.3.3.2]
MSMEG_1770	2.01842	5.58905e-13	13.672	1.20164e-14	12788	18063	24527	65708	66790	72006	5341.81	6252.84	5289.02	17097.6	17429.6	18871.6	conserved hypothetical protein
MSMEG_1783	3.66023	5.58905e-13	7.90281	1.21005e-14	69	40	83	836	582	730	28.823	13.847	17.898	217.532	151.879	191.321	hypothetical protein
MSMEG_1806	2.17288	5.70569e-13	5.2119	1.26216e-14	207	270	448	1324	1143	1282	86.468	93.465	96.607	344.513	298.278	335.991	conserved hypothetical protein
MSMEG_2837	3.21187	5.70569e-13	8.22159	1.24782e-14	33	28	65	368	302	377	13.785	9.693	14.017	95.756	78.81	98.806	nitrate reductase NarB
MSMEG_3543	3.80093	5.70569e-13	8.51992	1.25567e-14	243	211	354	3725	2832	3839	101.506	73.041	76.337	969.268	739.042	1006.14	soluble secreted antigen MPT53
MSMEG_0266	3.37591	5.82938e-13	9.76992	1.29867e-14	206	225	355	2817	1960	2779	86.05	77.888	76.552	733.001	511.484	728.33	K01585 arginine decarboxylase [EC:4.1.1.19]
MSMEG_0267	3.98107	6.28963e-13	10.0971	1.41107e-14	326	201	375	5408	2812	5186	136.177	69.58	80.865	1407.19	733.822	1359.17	esterase
MSMEG_3444	2.99065	6.54136e-13	7.37859	1.48807e-14	34	36	77	368	325	355	14.202	12.462	16.604	95.756	84.812	93.04	choline dehydrogenase
MSMEG_4918	2.63543	6.54136e-13	9.88334	1.47853e-14	556	645	1077	4818	3467	4657	232.253	223.278	232.245	1253.67	904.752	1220.52	K00700 1,4-alpha-glucan branching enzyme [EC:2.4.1.18]
MSMEG_3417	3.39583	6.61439e-13	4.09785	1.51506e-14	65	41	69	581	476	572	27.152	14.193	14.879	151.18	124.217	149.912	conserved hypothetical protein
MSMEG_6766	4.32775	6.79919e-13	7.43482	1.56806e-14	95	64	80	1136	1793	1364	39.683	22.155	17.251	295.594	467.903	357.482	K01990 ABC-2 type transport system ATP-binding protein
MSMEG_3142	2.4118	9.04124e-13	9.47535	2.09932e-14	204	248	388	1453	1164	1467	85.215	85.85	83.669	378.08	303.759	384.477	K21962 TetR/AcrR family transcriptional regulator, transcriptional repressor of aconitase
MSMEG_2375	2.28044	9.41562e-13	9.39692	2.21323e-14	327	398	674	2115	1842	2174	136.595	137.775	145.342	550.336	480.69	569.77	K03809 NAD(P)H dehydrogenase (quinone) [EC:1.6.5.2]
MSMEG_3937	5.84233	9.41562e-13	3.65186	2.21579e-14	8	7	8	352	516	401	3.342	2.423	1.725	91.593	134.656	105.096	conserved hypothetical protein
MSMEG_6230	2.77282	9.61842e-13	5.29456	2.2786e-14	127	173	283	1071	1306	1208	53.051	59.887	61.026	278.681	340.815	316.597	probable acyltransferase
MSMEG_0637	3.78767	9.79573e-13	9.51533	2.33598e-14	200	136	255	2918	1789	2823	83.544	47.079	54.988	759.281	466.859	739.862	iron-sulfur binding oxidoreductase
MSMEG_3951	4.69398	1.09317e-12	3.43944	2.62403e-14	46	19	49	692	1096	747	19.215	6.577	10.566	180.063	286.013	195.776	K00648 3-oxoacyl-[acyl-carrier-protein] synthase III [EC:2.3.1.180]
MSMEG_2609	-3.85017	1.10629e-12	3.44089	2.67287e-14	223	291	444	15	26	19	93.152	100.735	95.744	3.903	6.785	4.98	K02008 cobalt/nickel transport system permease protein
MSMEG_3929	4.62012	1.10946e-12	1.86684	2.69792e-14	16	12	13	258	368	282	6.684	4.154	2.803	67.133	96.034	73.908	[NiFe] hydrogenase, delta subunit, putative
MSMEG_2925	2.8639	1.14799e-12	7.27526	2.80965e-14	389	452	792	3848	3071	3827	162.493	156.468	170.787	1001.27	801.411	1002.99	K05846 osmoprotectant transport system permease protein
MSMEG_3930	4.95782	1.33789e-12	3.23741	3.29541e-14	35	19	31	654	1009	670	14.62	6.577	6.685	170.175	263.31	175.596	[NiFe] hydrogenase, gamma subunit, putative
MSMEG_5617	3.55734	1.37778e-12	6.07322	3.41526e-14	100	91	114	1103	998	1173	41.772	31.501	24.583	287.007	260.439	307.424	immunogenic protein MPT63
MSMEG_1174	5.5421	1.45676e-12	2.14689	3.63389e-14	41	18	14	852	864	779	17.127	6.231	3.019	221.696	225.47	204.163	cadmium inducible protein cadi
MSMEG_0686	3.96772	1.668e-12	7.47643	4.187e-14	52	37	77	948	519	931	21.721	12.808	16.604	246.675	135.439	244	K13483 xanthine dehydrogenase YagT iron-sulfur-binding subunit
MSMEG_0451	3.6109	2.13797e-12	8.45125	5.4338e-14	173	105	241	2316	1211	2307	72.266	36.348	51.969	602.637	316.024	604.627	oxidoreductase, FAD-linked
MSMEG_1793	3.19364	2.13797e-12	6.45486	5.40592e-14	38	33	53	389	277	372	15.873	11.424	11.429	101.22	72.286	97.495	membrane protein
MSMEG_5015	2.32999	2.18843e-12	8.08942	5.59638e-14	466	454	872	3189	2166	2851	194.658	157.16	188.039	829.797	565.242	747.2	secreted protein
MSMEG_0375	3.3576	2.55593e-12	8.2225	6.5763e-14	47	32	61	481	331	484	19.633	11.077	13.154	125.159	86.378	126.848	phospholipase D family protein
MSMEG_5826	2.35422	2.71032e-12	9.3194	7.01606e-14	190	188	333	1203	904	1218	79.367	65.08	71.808	313.028	235.909	319.218	K00156 pyruvate dehydrogenase (quinone) [EC:1.2.5.1]
MSMEG_0312	2.31817	2.83172e-12	3.04014	7.37474e-14	67	103	120	457	400	462	27.987	35.655	25.877	118.914	104.384	121.083	K01625 2-dehydro-3-deoxyphosphogluconate aldolase / (4S)-4-hydroxy-2-oxoglutarate aldolase
MSMEG_6612	3.66619	3.05491e-12	6.99591	8.00393e-14	67	47	102	909	649	902	27.987	16.27	21.995	236.527	169.364	236.399	K03924 MoxR-like ATPase [EC:3.6.3.-]
MSMEG_2112	3.07633	3.08539e-12	9.85379	8.18058e-14	173	153	279	1791	1279	1597	72.266	52.964	60.164	466.029	333.769	418.548	secreted protein
MSMEG_3290	2.192	3.08539e-12	8.00503	8.17698e-14	341	372	624	2062	1554	1976	142.443	128.775	134.56	536.545	405.533	517.877	regulatory protein
MSMEG_6728	3.24304	3.14089e-12	5.44477	8.37702e-14	58	52	78	642	452	534	24.228	18.001	16.82	167.052	117.954	139.953	conserved hypothetical protein
MSMEG_5344	3.57339	3.2195e-12	3.64383	8.6372e-14	26	25	29	235	324	309	10.861	8.654	6.254	61.148	84.551	80.984	hypothetical protein
MSMEG_6614	2.11578	3.22567e-12	6.26393	8.70435e-14	164	231	343	965	911	1016	68.506	79.965	73.965	251.099	237.735	266.277	K07098 uncharacterized protein
MSMEG_2694	2.29454	3.28362e-12	6.51135	8.91224e-14	477	573	727	2644	2560	2882	199.253	198.354	156.771	687.985	668.06	755.325	K27043 XRE family transcriptional regulator, stress-response regulator
MSMEG_1780	3.96362	3.68844e-12	7.09134	1.00689e-13	30	19	56	527	421	485	12.532	6.577	12.076	137.129	109.865	127.111	hypothetical protein
MSMEG_6515	1.96833	3.72904e-12	9.24337	1.02382e-13	576	700	1162	3088	2377	3215	240.607	242.318	250.575	803.517	620.304	842.599	K05343 maltose alpha-D-glucosyltransferase / alpha-amylase [EC:5.4.99.16 3.2.1.1]
MSMEG_3186	2.09264	3.88521e-12	9.8081	1.07279e-13	954	1078	1789	5574	3992	5375	398.505	373.169	385.781	1450.39	1041.76	1408.7	K01214 isoamylase [EC:3.2.1.68]
MSMEG_2310	1.9572	3.93738e-12	5.55584	1.09337e-13	520	621	989	2217	2818	2508	217.215	214.97	213.269	576.877	735.388	657.306	monooxygenase
MSMEG_1804	2.12122	4.12042e-12	8.6318	1.15067e-13	671	902	1400	4081	3640	3949	280.29	312.244	301.897	1061.9	949.898	1034.97	K03090 RNA polymerase sigma-B factor
MSMEG_6608	3.89264	4.5594e-12	6.2374	1.28041e-13	76	56	81	1003	823	1012	31.747	19.385	17.467	260.987	214.771	265.229	hypothetical protein
MSMEG_5540	2.21643	4.58853e-12	6.61116	1.29579e-13	135	164	247	820	695	803	56.392	56.772	53.263	213.369	181.368	210.453	conserved hypothetical protein
MSMEG_2037	3.32468	4.7644e-12	8.37818	1.35293e-13	67	61	119	860	523	906	27.987	21.116	25.661	223.777	136.483	237.448	conserved hypothetical protein
MSMEG_0697	3.82682	4.81145e-12	9.09146	1.37384e-13	91	65	90	1366	637	1284	38.013	22.501	19.408	355.442	166.232	336.515	integral membrane protein
MSMEG_3563	1.85073	4.85325e-12	7.14429	1.39339e-13	179	258	359	904	793	913	74.772	89.311	77.415	235.226	206.942	239.282	drug transporter
MSMEG_6322	2.57243	5.14572e-12	8.04231	1.48543e-13	49	53	99	392	304	389	20.468	18.347	21.348	102.001	79.332	101.951	K00635 diacylglycerol O-acyltransferase / wax synthase [EC:2.3.1.20 2.3.1.75]
MSMEG_6232	3.85914	5.63227e-12	8.76297	1.63472e-13	287	226	420	4254	3634	4452	119.886	78.234	90.569	1106.92	948.332	1166.8	K03781 catalase [EC:1.11.1.6]
MSMEG_0280	3.52064	5.78789e-12	9.3613	1.68897e-13	31	33	38	387	280	408	12.949	11.424	8.194	100.7	73.069	106.93	alpha/beta hydrolase fold
MSMEG_5772	2.07627	5.82812e-12	5.44269	1.70985e-13	99	115	201	528	524	524	41.354	39.809	43.344	137.389	136.744	137.332	cytospin-A, putative
MSMEG_5570	2.44999	6.46871e-12	8.82299	1.90793e-13	129	121	189	862	568	795	53.886	41.886	40.756	224.298	148.226	208.356	K01971 bifunctional non-homologous end joining protein LigD [EC:6.5.1.1]
MSMEG_4195	2.69174	6.82808e-12	7.83909	2.02464e-13	275	256	462	2435	1372	2191	114.873	88.619	99.626	633.602	358.039	574.225	conserved hypothetical protein
MSMEG_0672	2.69837	8.88543e-12	9.06361	2.65667e-13	422	409	646	3549	2240	3196	176.278	141.583	139.304	923.472	584.553	837.619	conserved hypothetical protein
MSMEG_6665	3.7141	8.88543e-12	9.60361	2.66256e-13	233	134	233	3024	1455	2948	97.329	46.387	50.244	786.863	379.698	772.623	integral membrane protein
MSMEG_3927	3.37928	9.09322e-12	2.97482	2.73909e-13	39	36	63	386	516	409	16.291	12.462	13.585	100.44	134.656	107.192	K03605 hydrogenase maturation protease [EC:3.4.23.-]
MSMEG_5329	2.29462	9.24272e-12	4.02616	2.79863e-13	79	83	137	518	370	456	33	28.732	29.543	134.787	96.556	119.51	K23541 Ca2+/H+ antiporter, TMEM165/GDT1 family
MSMEG_1030	2.00645	1.03381e-11	5.55789	3.14651e-13	500	639	917	2299	2835	2439	208.86	221.201	197.743	598.214	739.824	639.222	monooxygenase
MSMEG_2415	3.3664	1.05022e-11	10.0978	3.21294e-13	1064	995	1711	12750	9601	13527	444.455	344.437	368.961	3317.63	2505.49	3545.2	hemerythrin HHE cation binding region
MSMEG_0671	2.45761	1.17127e-11	9.50586	3.60163e-13	739	800	1203	5268	3861	4831	308.695	276.935	259.416	1370.77	1007.57	1266.13	S-(hydroxymethyl)glutathione dehydrogenase
MSMEG_2959	2.4977	1.21179e-11	9.53148	3.74527e-13	208	228	403	1411	1427	1435	86.886	78.926	86.903	367.151	372.391	376.09	K07250 4-aminobutyrate aminotransferase / (S)-3-amino-2-methylpropionate transaminase
MSMEG_5418	-2.91912	1.29378e-11	2.30914	4.01895e-13	201	317	466	39	36	40	83.962	109.735	100.489	10.148	9.395	10.483	K07243 high-affinity iron transporter
MSMEG_6211	3.4057	1.3034e-11	6.48679	4.08973e-13	26	21	41	327	238	285	10.861	7.27	8.841	85.087	62.109	74.694	hypothetical protein
MSMEG_6636	-2.89588	1.3034e-11	2.34892	4.07739e-13	175	223	346	39	26	26	73.101	77.196	74.612	10.148	6.785	6.814	K04564 superoxide dismutase, Fe-Mn family [EC:1.15.1.1]
MSMEG_1788	3.70516	1.36354e-11	10.3318	4.29985e-13	275	165	301	3704	1782	3696	114.873	57.118	64.908	963.804	465.033	968.661	conserved hypothetical protein
MSMEG_4318	2.80776	1.71044e-11	5.4839	5.4206e-13	30	31	61	285	195	307	12.532	10.731	13.154	74.159	50.887	80.46	hypothetical protein
MSMEG_1077	2.02551	1.77735e-11	8.14917	5.66051e-13	333	427	755	2086	1488	1973	139.101	147.814	162.809	542.79	388.31	517.091	conserved hypothetical protein
MSMEG_3305	1.98716	1.86542e-11	5.77875	5.97027e-13	42	56	96	215	240	239	17.544	19.385	20.702	55.944	62.631	62.638	integral membrane protein DUF6
MSMEG_3938	5.8193	1.9682e-11	3.52145	6.33012e-13	31	7	7	466	640	519	12.949	2.423	1.509	121.256	167.015	136.021	hypothetical protein
MSMEG_5876	2.69495	1.98472e-11	6.11302	6.41437e-13	27	44	55	234	233	277	11.278	15.231	11.86	60.888	60.804	72.597	H-N-H endonuclease F-TflIV
MSMEG_1757	1.99543	2.23405e-11	9.43959	7.28751e-13	372	437	777	1853	1902	1913	155.392	151.276	167.553	482.162	496.348	501.366	K03724 ATP-dependent helicase Lhr and Lhr-like helicase [EC:5.6.2.6 5.6.2.4]
MSMEG_6611	3.64315	2.23405e-11	3.81279	7.29027e-13	21	14	17	222	172	180	8.772	4.846	3.666	57.766	44.885	47.175	hypothetical protein
MSMEG_6514	1.84793	2.25733e-11	9.64292	7.40166e-13	908	1082	1719	4377	3380	4462	379.29	374.554	370.686	1138.92	882.048	1169.42	K16146 maltokinase [EC:2.7.1.175]
MSMEG_3233	2.05744	2.32947e-11	5.7003	7.67474e-13	252	279	467	1394	997	1428	105.266	96.581	100.704	362.727	260.178	374.255	K00425 cytochrome bd ubiquinol oxidase subunit I [EC:7.1.1.7]
MSMEG_5559	3.31848	2.37667e-11	5.45272	7.94211e-13	23	15	57	300	231	275	9.608	5.193	12.292	78.062	60.282	72.073	metabolite/sugar transport protein
MSMEG_6751	3.2869	2.37667e-11	5.76228	7.9165e-13	12	16	38	237	163	181	5.013	5.539	8.194	61.669	42.537	47.437	hypothetical protein
MSMEG_6768	3.67245	2.37667e-11	8.59046	7.93723e-13	100	83	157	1495	1037	1419	41.772	28.732	33.856	389.008	270.617	371.897	halogenase
MSMEG_6667	3.95405	2.63867e-11	4.583	8.85904e-13	22	11	26	299	210	301	9.19	3.808	5.607	77.802	54.802	78.887	conserved hypothetical protein
MSMEG_1172	4.14831	2.71059e-11	2.14802	9.14304e-13	30	17	29	334	445	408	12.532	5.885	6.254	86.909	116.128	106.93	K03325 arsenite transporter
MSMEG_4916	2.05673	2.89466e-11	9.86696	9.80932e-13	458	493	868	2591	1752	2611	191.316	170.661	187.176	674.194	457.204	684.3	K16147 starch synthase (maltosyl-transferring) [EC:2.4.99.16]
MSMEG_6676	3.13457	3.14706e-11	5.19734	1.0714e-12	15	16	27	189	130	156	6.266	5.539	5.822	49.179	33.925	40.885	probable conserved transmembrane protein
MSMEG_6819	3.45707	3.22608e-11	7.91918	1.10337e-12	61	37	88	759	393	710	25.481	12.808	18.976	197.496	102.558	186.079	pseudogene
MSMEG_3443	3.09602	3.53262e-11	8.23021	1.21375e-12	53	36	100	562	358	511	22.139	12.462	21.564	146.236	93.424	133.925	hypothetical protein
MSMEG_6500	2.02802	3.64907e-11	8.78013	1.25949e-12	141	153	294	776	577	813	58.899	52.964	63.398	201.92	150.575	213.074	conserved hypothetical protein
MSMEG_6508	2.20044	3.72523e-11	3.05277	1.29162e-12	89	78	139	413	407	451	37.177	27.001	29.974	107.465	106.211	118.2	MarR-family protein transcriptional regulator
MSMEG_2594	1.71332	3.74803e-11	10.7862	1.3054e-12	1947	2550	3819	9061	6929	8927	813.302	882.729	823.532	2357.73	1808.2	2339.62	K01953 asparagine synthase (glutamine-hydrolysing) [EC:6.3.5.4]
MSMEG_1001	2.55205	3.77838e-11	8.88728	1.3219e-12	336	386	636	2646	1862	2836	140.354	133.621	137.148	688.505	485.909	743.269	acetyltransferase, gnat family protein, putative
MSMEG_2376	4.10207	3.802e-11	9.82796	1.33613e-12	129	80	148	2496	1032	2331	53.886	27.693	31.915	649.475	269.312	610.917	conserved hypothetical protein
MSMEG_3231	1.9767	4.14782e-11	6.41639	1.46417e-12	239	295	391	1117	1113	1124	99.835	102.12	84.316	290.65	290.45	294.582	K16013 ATP-binding cassette, subfamily C, bacterial CydD
MSMEG_6820	3.43336	4.60985e-11	4.45489	1.63449e-12	13	16	29	205	150	230	5.43	5.539	6.254	53.342	39.144	60.279	K03787 5'/3'-nucleotidase [EC:3.1.3.5 3.1.3.6]
MSMEG_0669	3.45458	4.78265e-11	5.96372	1.70326e-12	37	36	60	536	367	438	15.456	12.462	12.938	139.47	95.773	114.793	hypothetical protein
MSMEG_3773	2.31462	5.02623e-11	3.37534	1.7979e-12	104	133	187	519	882	576	43.443	46.04	40.325	135.047	230.168	150.96	K00821 acetylornithine/N-succinyldiaminopimelate aminotransferase [EC:2.6.1.11 2.6.1.17]
MSMEG_0696	3.31839	5.31447e-11	7.8545	1.90934e-12	38	34	54	479	266	430	15.873	11.77	11.645	124.639	69.416	112.696	alanine-rich protein
MSMEG_0406	1.94793	5.4721e-11	6.73046	1.98314e-12	359	406	526	1573	1557	1492	149.962	140.544	113.427	409.304	406.316	391.029	acyl-coA-dehydrogenase
MSMEG_3273	3.07219	5.4721e-11	7.94526	1.97698e-12	42	45	57	443	270	413	17.544	15.578	12.292	115.271	70.459	108.241	glutamyl aminopeptidase, M42 family protein
MSMEG_5550	2.19211	5.48046e-11	5.23271	2.00337e-12	51	55	100	302	226	333	21.304	19.039	21.564	78.582	58.977	87.274	pseudogene
MSMEG_5782	2.63069	5.48046e-11	4.83366	2.00036e-12	115	118	191	858	623	947	48.038	40.848	41.187	223.257	162.579	248.193	K02040 phosphate transport system substrate-binding protein
MSMEG_5799	2.38954	5.6344e-11	8.11962	2.06848e-12	234	247	448	1499	1296	1609	97.747	85.504	96.607	390.049	338.205	421.693	nucleoside-diphosphate-sugar epimerase
MSMEG_5773	2.07136	5.65704e-11	7.96522	2.08567e-12	437	471	799	2432	1888	2229	182.544	163.045	172.297	632.821	492.694	584.184	K03921 acyl-[acyl-carrier-protein] desaturase [EC:1.14.19.2 1.14.19.11 1.14.19.26]
MSMEG_0265	3.96824	5.72408e-11	7.68393	2.11936e-12	29	19	34	488	244	466	12.114	6.577	7.332	126.981	63.674	122.131	K21929 uracil-DNA glycosylase [EC:3.2.2.27]
MSMEG_0313	2.03583	5.75787e-11	5.13871	2.14091e-12	345	473	736	2152	1520	2134	144.114	163.738	158.712	559.964	396.661	559.286	K01690 phosphogluconate dehydratase [EC:4.2.1.12]
MSMEG_3611	2.80523	5.97781e-11	7.6251	2.23207e-12	46	48	74	449	243	414	19.215	16.616	15.957	116.833	63.414	108.503	K01621 xylulose-5-phosphate/fructose-6-phosphate phosphoketolase [EC:4.1.2.9 4.1.2.22]
MSMEG_2113	2.92913	6.0124e-11	6.5898	2.25442e-12	38	38	79	397	302	368	15.873	13.154	17.036	103.302	78.81	96.447	hypothetical protein
MSMEG_0268	2.09019	7.28988e-11	6.89464	2.74486e-12	208	217	435	1263	876	1156	86.886	75.119	93.804	328.64	228.602	302.969	K03710 GntR family transcriptional regulator
MSMEG_5134	2.72887	7.88937e-11	2.41554	2.98296e-12	35	32	54	259	272	202	14.62	11.077	11.645	67.393	70.981	52.941	hypothetical protein
MSMEG_6769	2.94691	8.0113e-11	7.13021	3.04163e-12	156	116	248	1308	1025	1261	65.164	40.156	53.479	340.35	267.485	330.487	K26731 K+:H+ antiporter
MSMEG_5526	2.29286	9.24901e-11	9.47085	3.52606e-12	693	742	1139	4087	3395	4142	289.48	256.857	245.615	1063.46	885.963	1085.55	peptidoglycan-binding LysM
MSMEG_2914	2.11243	9.60142e-11	6.94317	3.67547e-12	68	63	113	353	265	342	28.405	21.809	24.367	91.853	69.155	89.633	K00098 L-idonate 5-dehydrogenase [EC:1.1.1.264]
MSMEG_0763	2.11433	9.69768e-11	7.05303	3.72754e-12	333	381	645	1808	1562	1976	139.101	131.89	139.088	470.453	407.621	517.877	K06994 putative drug exporter of the RND superfamily
MSMEG_5938	3.38702	1.05228e-10	8.11316	4.06118e-12	76	55	101	938	429	941	31.747	19.039	21.78	244.073	111.952	246.621	hypothetical protein
MSMEG_0601	2.57808	1.09044e-10	5.09602	4.22559e-12	38	29	59	240	181	261	15.873	10.039	12.723	62.449	47.234	68.404	conserved hypothetical protein
MSMEG_0523	3.00499	1.10001e-10	6.68135	4.29241e-12	27	16	37	224	153	197	11.278	5.539	7.979	58.286	39.927	51.63	DNA-binding protein
MSMEG_3201	2.06949	1.10001e-10	6.19539	4.2972e-12	216	285	423	1393	944	1231	90.228	98.658	91.216	362.467	246.347	322.625	K00767 nicotinate-nucleotide pyrophosphorylase (carboxylating) [EC:2.4.2.19]
MSMEG_1853	2.12385	1.1985e-10	7.00474	4.70073e-12	124	131	221	606	605	673	51.797	45.348	47.657	157.685	157.881	176.382	pseudogene
MSMEG_0963	3.38569	1.23522e-10	8.18543	4.86414e-12	20	20	32	282	165	262	8.354	6.923	6.901	73.378	43.059	68.666	hypothetical protein
MSMEG_6666	1.75466	1.37608e-10	5.09538	5.44042e-12	139	177	269	662	501	643	58.063	61.272	58.007	172.256	130.741	168.52	conserved hypothetical protein
MSMEG_5079	1.95773	1.45884e-10	5.46577	5.79049e-12	78	87	148	439	301	373	32.582	30.117	31.915	114.23	78.549	97.757	conserved hypothetical protein
MSMEG_5873	2.04838	1.62382e-10	5.96068	6.47081e-12	85	131	182	449	576	471	35.506	45.348	39.247	116.833	150.314	123.441	conserved hypothetical protein
MSMEG_6422	2.71403	1.63083e-10	4.80174	6.54994e-12	202	229	276	1795	1022	1608	84.38	79.273	59.517	467.07	266.702	421.43	K22336 bacterioferritin B [EC:1.16.3.1]
MSMEG_6512	1.62607	1.63083e-10	6.61528	6.53714e-12	200	268	421	814	804	855	83.544	92.773	90.785	211.808	209.813	224.082	acyl-CoA dehydrogenase domain protein
MSMEG_1132	2.09214	1.68965e-10	7.39548	6.81267e-12	189	247	362	1264	754	1154	78.949	85.504	78.062	328.901	196.765	302.445	K21401 menaquinone-9 beta-reductase [EC:1.3.99.38]
MSMEG_2592	1.70642	1.76495e-10	5.28866	7.14396e-12	189	240	352	780	718	829	78.949	83.08	75.906	202.961	187.37	217.267	conserved hypothetical protein
MSMEG_1786	2.06467	1.89223e-10	5.53041	7.68884e-12	77	78	114	379	294	358	32.164	27.001	24.583	98.618	76.723	93.826	stas domain, putative
MSMEG_6787	2.88485	2.02765e-10	8.15572	8.27091e-12	74	64	135	758	372	766	30.911	22.155	29.111	197.236	97.077	200.756	K01808 ribose 5-phosphate isomerase B [EC:5.3.1.6]
MSMEG_1477	1.84664	2.16513e-10	9.57486	8.8657e-12	1065	1363	2351	5384	4595	5405	444.872	471.827	506.971	1400.95	1199.12	1416.56	K03762 MFS transporter, MHS family, proline/betaine transporter
MSMEG_0279	3.05281	2.21559e-10	5.10248	9.10706e-12	18	17	24	167	130	154	7.519	5.885	5.175	43.454	33.925	40.361	amino acid permease
MSMEG_5590	3.22175	2.385e-10	8.00654	9.84085e-12	103	67	146	1129	579	1003	43.025	23.193	31.484	293.773	151.096	262.87	K06048 glutamate---cysteine ligase / carboxylate-amine ligase [EC:6.3.2.2 6.3.-.-]
MSMEG_0536	1.83132	2.41818e-10	6.38996	1.00157e-11	58	65	102	260	207	265	24.228	22.501	21.995	67.654	54.019	69.452	K05520 deglycase [EC:3.5.1.124]
MSMEG_1886	2.52436	2.88238e-10	8.4272	1.19835e-11	446	460	840	3044	2840	3186	186.303	159.237	181.138	792.067	741.129	834.998	K22769 NADPH-dependent stearoyl-CoA 9-desaturase [EC:1.14.19.-]
MSMEG_3593	2.13665	2.98106e-10	7.49701	1.24406e-11	68	52	104	338	236	316	28.405	18.001	22.427	87.95	61.587	82.818	conserved hypothetical protein
MSMEG_3862	1.92349	2.99849e-10	4.08807	1.25604e-11	61	67	90	271	230	254	25.481	23.193	19.408	70.516	60.021	66.569	K07113 UPF0716 protein FxsA
MSMEG_6785	2.60048	3.22648e-10	6.97255	1.3566e-11	68	69	100	547	296	513	28.405	23.886	21.564	142.333	77.244	134.449	K21910 L-erythrulose 1-phosphate isomerase [EC:5.3.1.33]
MSMEG_6760	-1.64236	3.37275e-10	5.31058	1.42339e-11	1139	1463	2629	570	399	533	475.784	506.444	566.919	148.317	104.123	139.691	conserved hypothetical protein
MSMEG_2036	2.53023	3.8475e-10	4.03522	1.62978e-11	30	41	50	244	164	240	12.532	14.193	10.782	63.49	42.798	62.9	hydrolase, alpha/beta fold family protein
MSMEG_1315	3.62609	3.93603e-10	7.01691	1.67346e-11	37	30	52	543	284	560	15.456	10.385	11.213	141.292	74.113	146.767	K22044 moderate conductance mechanosensitive channel
MSMEG_6511	1.75602	4.65011e-10	5.80207	1.98436e-11	106	156	208	489	506	449	44.278	54.002	44.853	127.241	132.046	117.676	acyl-CoA dehydrogenase domain protein
MSMEG_5390	2.23732	4.72301e-10	7.11457	2.03029e-11	44	45	92	295	207	272	18.38	15.578	19.839	76.761	54.019	71.287	conserved hypothetical protein
MSMEG_6812	3.26469	5.13545e-10	6.7741	2.21564e-11	25	16	23	198	141	212	10.443	5.539	4.96	51.521	36.796	55.562	pseudogene
MSMEG_5016	2.34535	5.21694e-10	6.83077	2.25898e-11	203	194	395	1614	858	1239	84.797	67.157	85.178	419.973	223.905	324.722	conserved domain protein
MSMEG_2593	1.64591	5.38077e-10	11.0665	2.33836e-11	2506	3394	5051	11336	8542	11409	1046.81	1174.89	1089.2	2949.7	2229.13	2990.11	gnat-family protein acetyltransferase
MSMEG_1314	2.62485	5.62725e-10	3.3782	2.45431e-11	29	49	44	269	172	247	12.114	16.962	9.488	69.995	44.885	64.735	hypothetical protein
MSMEG_4991	1.68302	5.73152e-10	8.9944	2.50878e-11	182	234	376	793	683	825	76.025	81.003	81.081	206.343	178.236	216.219	hypothetical protein
MSMEG_1113	2.4973	6.35839e-10	5.09371	2.80312e-11	23	36	51	234	153	187	9.608	12.462	10.998	60.888	39.927	49.01	K12583 phosphatidylinositol alpha 1,6-mannosyltransferase [EC:2.4.1.-]
MSMEG_3416	2.92866	6.37957e-10	2.84078	2.82246e-11	37	36	66	348	310	302	15.456	12.462	14.232	90.552	80.898	79.149	protein of unknown function DUF6, transmembrane, putative
MSMEG_4567	1.59865	7.64316e-10	5.31069	3.3935e-11	99	145	216	415	383	461	41.354	50.194	46.578	107.986	99.948	120.821	conserved hypothetical protein
MSMEG_1885	1.70978	7.89132e-10	9.01514	3.51606e-11	411	493	780	1858	1409	1773	171.683	170.661	168.2	483.463	367.694	464.674	K22770 stearoyl-CoA 9-desaturase NADPH oxidoreductase
MSMEG_5013	1.70061	8.13252e-10	4.38405	3.63629e-11	143	161	289	651	508	582	59.734	55.733	62.32	169.394	132.568	152.533	conserved hypothetical protein
MSMEG_6233	3.73295	8.37147e-10	6.219	3.75626e-11	10	7	13	131	103	140	4.177	2.423	2.803	34.087	26.879	36.692	conserved hypothetical protein
MSMEG_6730	1.67872	8.5516e-10	5.11827	3.8505e-11	203	260	529	1003	863	903	84.797	90.004	114.074	260.987	225.209	236.662	K05275 pyridoxine 4-dehydrogenase [EC:1.1.1.65]
MSMEG_5527	2.88479	9.42043e-10	6.10172	4.27126e-11	29	23	71	290	226	275	12.114	7.962	15.31	75.46	58.977	72.073	conserved hypothetical protein
MSMEG_0968	2.50001	9.68674e-10	8.70003	4.40721e-11	84	90	126	662	341	612	35.089	31.155	27.171	172.256	88.988	160.395	cytochrome P450
MSMEG_1064	2.89955	9.70468e-10	4.96956	4.4306e-11	146	108	193	1453	559	1246	60.987	37.386	41.619	378.08	145.877	326.556	K03306 inorganic phosphate transporter, PiT family
MSMEG_3311	2.90026	9.88858e-10	7.11063	4.54558e-11	17	17	45	171	145	213	7.101	5.885	9.704	44.495	37.839	55.824	acyl carrier protein
MSMEG_1910	2.44732	1.13853e-09	3.80643	5.25145e-11	26	21	43	148	150	144	10.861	7.27	9.273	38.511	39.144	37.74	muconate cycloisomerase
MSMEG_3460	2.05945	1.25368e-09	5.96909	5.80228e-11	72	64	129	335	302	354	30.076	22.155	27.818	87.169	78.81	92.778	K22297 Fur family transcriptional regulator, stress-responsive regulator
MSMEG_1744	2.16548	1.26487e-09	4.96316	5.87389e-11	106	93	115	460	395	426	44.278	32.194	24.799	119.695	103.08	111.648	hypothetical protein
MSMEG_6423	1.81576	1.4391e-09	4.8061	6.70558e-11	221	330	453	1313	851	1087	92.316	114.236	97.685	341.651	222.078	284.885	K01126 glycerophosphoryl diester phosphodiesterase [EC:3.1.4.46]
MSMEG_1114	2.39668	1.55433e-09	4.08141	7.26689e-11	32	43	63	268	162	248	13.367	14.885	13.585	69.735	42.276	64.997	short chain dehydrogenase
MSMEG_4993	3.51645	1.62089e-09	7.88933	7.60349e-11	61	29	64	580	349	626	25.481	10.039	13.801	150.92	91.075	164.064	hypothetical protein
MSMEG_3772	2.15669	1.83213e-09	3.52826	8.65189e-11	136	150	263	591	1053	640	56.81	51.925	56.714	153.782	274.792	167.734	K00611 ornithine carbamoyltransferase [EC:2.1.3.3]
MSMEG_3564	1.6695	2.09131e-09	9.71237	9.93996e-11	1402	1759	2744	6687	4665	5855	585.644	608.91	591.718	1740	1217.38	1534.5	K03594 bacterioferritin [EC:1.16.3.1]
MSMEG_5498	3.9094	2.09131e-09	1.74051	9.94144e-11	7	10	10	141	113	131	2.924	3.462	2.156	36.689	29.489	34.333	K20467 heme-binding protein
MSMEG_3268	2.74002	2.1266e-09	3.53196	1.01714e-10	18	18	27	111	137	140	7.519	6.231	5.822	28.883	35.752	36.692	K02026 multiple sugar transport system permease protein
MSMEG_3265	2.49549	2.45781e-09	2.88614	1.18379e-10	19	29	41	135	171	154	7.937	10.039	8.841	35.128	44.624	40.361	K23271 erythritol/L-threitol dehydrogenase [EC:1.1.1.-]
MSMEG_3582	1.83691	2.45781e-09	4.2105	1.18129e-10	57	73	106	257	238	273	23.81	25.27	22.858	66.873	62.109	71.549	K01338 ATP-dependent Lon protease [EC:3.4.21.53]
MSMEG_1358	2.63394	2.51008e-09	7.60576	1.21291e-10	42	43	101	449	220	400	17.544	14.885	21.78	116.833	57.411	104.833	conserved hypothetical protein
MSMEG_6354	3.51783	3.54855e-09	9.92422	1.73141e-10	286	242	444	3587	2917	3664	119.468	83.773	95.744	933.359	761.223	960.274	K27358 cutinase-like protein [EC:3.1.1.-]
MSMEG_3200	1.93848	3.9243e-09	7.55005	1.9209e-10	394	549	828	2514	1555	2173	164.582	190.046	178.551	654.158	405.794	569.508	K00278 L-aspartate oxidase [EC:1.4.3.16]
MSMEG_0586	2.60258	4.26129e-09	6.47912	2.10591e-10	132	145	207	638	1620	700	55.139	50.194	44.638	166.012	422.757	183.459	stas domain, putative
MSMEG_3708	-2.35625	4.41372e-09	2.54232	2.18816e-10	88	118	182	16	38	18	36.759	40.848	39.247	4.163	9.917	4.718	K03781 catalase [EC:1.11.1.6]
MSMEG_3082	2.35428	4.50811e-09	8.41466	2.24203e-10	402	478	763	2469	2536	2626	167.924	165.468	164.534	642.449	661.797	688.232	soul heme-binding protein
MSMEG_5604	3.77162	4.84424e-09	2.54978	2.4396e-10	25	23	23	343	202	343	10.443	7.962	4.96	89.251	52.714	89.895	integral membrane protein
MSMEG_1131	3.42048	5.41361e-09	6.99531	2.75182e-10	140	98	128	1808	575	1552	58.481	33.924	27.602	470.453	150.053	406.754	K05770 translocator protein
MSMEG_1792	3.33807	5.5141e-09	8.8453	2.81155e-10	73	58	92	939	342	967	30.494	20.078	19.839	244.334	89.249	253.435	conserved hypothetical protein
MSMEG_0521	3.28256	5.55617e-09	6.98913	2.84422e-10	28	19	38	337	152	293	11.696	6.577	8.194	87.689	39.666	76.791	pseudogene
MSMEG_5072	1.98688	6.10199e-09	6.55754	3.14003e-10	266	274	420	1091	1114	1302	111.114	94.85	90.569	283.885	290.711	341.233	K03088 RNA polymerase sigma-70 factor, ECF subfamily
MSMEG_2416	1.91902	6.34888e-09	10.4121	3.27703e-10	1836	2567	4134	9918	8523	10493	766.935	888.614	891.459	2580.72	2224.17	2750.04	conserved hypothetical protein
MSMEG_3137	2.18403	6.37414e-09	6.92305	3.30007e-10	70	88	126	433	331	420	29.24	30.463	27.171	112.669	86.378	110.075	oxidoreductase
MSMEG_3202	1.84423	7.01008e-09	3.87798	3.64731e-10	46	64	87	252	169	232	19.215	22.155	18.761	65.572	44.102	60.803	hypothetical protein
MSMEG_1742	2.32225	7.24247e-09	9.44398	3.80645e-10	393	490	759	3170	1578	3072	164.164	169.622	163.671	824.853	411.796	805.121	K22770 stearoyl-CoA 9-desaturase NADPH oxidoreductase
MSMEG_6752	1.67884	7.35945e-09	6.41171	3.87947e-10	136	195	289	638	522	639	56.81	67.503	62.32	166.012	136.222	167.471	K01179 endoglucanase [EC:3.2.1.4]
MSMEG_2610	-1.90169	8.0038e-09	2.98145	4.26936e-10	153	218	326	51	49	69	63.911	75.465	70.299	13.271	12.787	18.084	K02006 cobalt/nickel transport system ATP-binding protein
MSMEG_5474	2.14703	8.27029e-09	5.8027	4.42449e-10	29	22	43	131	112	132	12.114	7.616	9.273	34.087	29.228	34.595	universal stress protein family protein
MSMEG_3083	2.74299	1.00717e-08	7.71657	5.43559e-10	249	269	428	2071	1684	2058	104.012	93.119	92.294	538.887	439.458	539.368	K07071 uncharacterized protein
MSMEG_0651	2.1846	1.02793e-08	6.37483	5.56377e-10	48	57	108	425	230	249	20.051	19.732	23.289	110.588	60.021	65.259	putative conserved exported protein
MSMEG_1175	2.61949	1.03946e-08	2.68857	5.64251e-10	37	38	43	266	159	245	15.456	13.154	9.273	69.215	41.493	64.21	K03892 ArsR family transcriptional regulator
MSMEG_2027	1.65261	1.08225e-08	6.19798	5.89175e-10	671	1061	1422	3479	2215	3434	280.29	367.284	306.641	905.257	578.029	899.995	K00540 F420H(2)-dependent quinone reductase [EC:1.1.98.-]
MSMEG_1743	2.0876	1.12173e-08	7.21133	6.1595e-10	97	109	180	562	421	515	40.519	37.732	38.815	146.236	109.865	134.973	K22769 NADPH-dependent stearoyl-CoA 9-desaturase [EC:1.14.19.-]
MSMEG_0600	2.93174	1.4287e-08	5.7018	7.97954e-10	17	14	38	203	117	160	7.101	4.846	8.194	52.822	30.532	41.933	dehydrogenase
MSMEG_4510	1.64214	1.4545e-08	3.54985	8.14646e-10	37	52	97	180	178	161	15.456	18.001	20.917	46.837	46.451	42.195	K04792 mycobactin peptide synthetase MbtF
MSMEG_3266	2.60088	1.48365e-08	2.42091	8.35631e-10	9	7	28	69	73	86	3.759	2.423	6.038	17.954	19.05	22.539	K02027 multiple sugar transport system substrate-binding protein
MSMEG_0430	1.79664	1.50105e-08	8.69384	8.50033e-10	179	254	381	930	694	951	74.772	87.927	82.159	241.992	181.107	249.242	K07485 transposase
MSMEG_4569	1.60296	2.12935e-08	4.18598	1.22269e-09	40	75	117	208	181	240	16.709	25.963	25.23	54.123	47.234	62.9	conserved hypothetical protein
MSMEG_3312	2.2821	2.66309e-08	6.83108	1.5417e-09	26	27	55	200	115	172	10.861	9.347	11.86	52.041	30.011	45.078	hemerythrin HHE cation binding domain subfamily protein, putative
MSMEG_5180	1.96767	2.67889e-08	9.20944	1.55505e-09	632	814	1363	2618	4484	3006	263.999	281.781	293.918	681.22	1170.15	787.823	conserved hypothetical protein
MSMEG_3771	1.59099	3.18454e-08	3.43762	1.85357e-09	130	135	246	358	634	434	54.304	46.733	53.048	93.154	165.449	113.744	K03402 transcriptional regulator of arginine metabolism
MSMEG_0522	3.28541	3.24646e-08	6.46281	1.8947e-09	9	9	16	132	64	132	3.759	3.116	3.45	34.347	16.702	34.595	pp24 protein
MSMEG_0650	1.87146	3.79739e-08	3.22032	2.24007e-09	27	25	46	114	106	105	11.278	8.654	9.919	29.663	27.662	27.519	K24968 GntR family transcriptional regulator, repressor of the phnDCE operon
MSMEG_0450	3.32927	4.35271e-08	4.01497	2.58131e-09	9	9	15	104	76	142	3.759	3.116	3.235	27.061	19.833	37.216	hypothetical protein
MSMEG_2341	3.0817	4.56641e-08	2.49963	2.72237e-09	9	9	17	89	109	80	3.759	3.116	3.666	23.158	28.445	20.967	conserved hypothetical protein
MSMEG_6762	-1.80178	4.59339e-08	3.00382	2.75632e-09	183	229	426	72	59	83	76.443	79.273	91.863	18.735	15.397	21.753	transcriptional regulator
MSMEG_6306	2.13682	5.69219e-08	6.04662	3.45604e-09	33	41	73	243	146	209	13.785	14.193	15.742	63.23	38.1	54.775	K01885 glutamyl-tRNA synthetase [EC:6.1.1.17]
MSMEG_1359	2.25013	6.12189e-08	4.31723	3.73614e-09	23	27	35	169	87	128	9.608	9.347	7.547	43.975	22.704	33.547	DeoR-family protein transcriptional regulator
MSMEG_6355	3.75441	8.72115e-08	5.96555	5.46327e-09	60	46	90	796	714	864	25.063	15.924	19.408	207.124	186.326	226.44	hypothetical protein
MSMEG_1066	3.0717	8.83801e-08	2.76653	5.56015e-09	38	30	33	358	128	337	15.873	10.385	7.116	93.154	33.403	88.322	conserved hypothetical protein
MSMEG_4961	1.72531	9.46804e-08	3.48218	5.98623e-09	87	132	143	473	256	399	36.342	45.694	30.837	123.077	66.806	104.571	hypothetical protein
MSMEG_3267	2.10639	9.83545e-08	3.7891	6.23395e-09	23	26	34	95	124	109	9.608	9	7.332	24.72	32.359	28.567	K02025 multiple sugar transport system permease protein
MSMEG_3269	2.92829	1.00189e-07	3.63432	6.38169e-09	15	11	27	99	166	107	6.266	3.808	5.822	25.76	43.32	28.043	putative sugar ABC transporter ATP-binding protein
MSMEG_4643	-2.94919	1.1688e-07	-0.172895	7.51488e-09	45	51	129	4	15	8	18.797	17.655	27.818	1.041	3.914	2.097	K21691 resuscitation-promoting factor RpfE
MSMEG_6739	2.08391	1.55872e-07	4.26321	1.02953e-08	9	13	15	46	46	54	3.759	4.5	3.235	11.969	12.004	14.153	hypothetical protein
MSMEG_4707	2.50818	1.65447e-07	6.03532	1.09796e-08	83	78	137	688	335	580	34.671	27.001	29.543	179.022	87.422	152.009	K00433 non-heme chloroperoxidase [EC:1.11.1.10]
MSMEG_5571	1.68947	1.68649e-07	6.57804	1.12186e-08	39	40	63	123	147	147	16.291	13.847	13.585	32.005	38.361	38.526	K10112 multiple sugar transport system ATP-binding protein [EC:7.5.2.-]
MSMEG_6236	-3.80365	1.79723e-07	2.31165	1.19834e-08	25	41	90	2	2	5	10.443	14.193	19.408	0.52	0.522	1.31	two-component system, regulatory protein
MSMEG_3022	2.49743	1.85694e-07	6.33174	1.24689e-08	25	26	48	195	167	149	10.443	9	10.351	50.74	43.58	39.05	transglycosylase associated protein
MSMEG_5603	3.43888	2.20153e-07	0.330106	1.49555e-08	9	5	8	88	55	83	3.759	1.731	1.725	22.898	14.353	21.753	K21885 ArsR family transcriptional regulator, cadmium/lead-responsive transcriptional repressor
MSMEG_6239	-2.08772	2.4055e-07	4.79877	1.64543e-08	78	121	165	27	19	32	32.582	41.886	35.581	7.026	4.958	8.387	1,3-propanediol dehydrogenase
MSMEG_6836	2.83418	2.43843e-07	3.32888	1.67178e-08	9	9	8	69	48	56	3.759	3.116	1.725	17.954	12.526	14.677	K22770 stearoyl-CoA 9-desaturase NADPH oxidoreductase
MSMEG_5368	-1.72285	2.54625e-07	3.5381	1.75769e-08	67	87	132	24	21	34	27.987	30.117	28.465	6.245	5.48	8.911	K02030 polar amino acid transport system substrate-binding protein
MSMEG_0012	-1.73183	2.56581e-07	1.72465	1.77924e-08	68	79	145	27	29	22	28.405	27.347	31.268	7.026	7.568	5.766	K23186 iron-siderophore transport system permease protein
MSMEG_3438	1.66048	2.68607e-07	10.2791	1.87106e-08	987	1260	1883	4391	3824	3690	412.29	436.172	406.051	1142.57	997.915	967.089	hypothetical protein
MSMEG_6786	2.22079	2.68834e-07	1.94682	1.87686e-08	10	15	14	58	51	58	4.177	5.193	3.019	15.092	13.309	15.201	conserved hypothetical protein
MSMEG_6047	-1.66504	2.70831e-07	2.04785	1.89505e-08	73	110	181	39	35	28	30.494	38.079	39.031	10.148	9.134	7.338	K02077 zinc/manganese transport system substrate-binding protein
MSMEG_6678	1.84774	2.8805e-07	7.89923	2.02457e-08	33	32	59	140	114	153	13.785	11.077	12.723	36.429	29.75	40.099	conserved hypothetical protein
MSMEG_2838	2.84156	2.98266e-07	5.31028	2.10106e-08	6	7	10	44	56	59	2.506	2.423	2.156	11.449	14.614	15.463	conserved hypothetical protein
MSMEG_1909	2.59231	4.36372e-07	3.89874	3.12868e-08	9	11	21	90	54	91	3.759	3.808	4.528	23.419	14.092	23.85	putative HTH-type transcriptional regulator YnfL
MSMEG_0314	1.59389	4.39095e-07	3.63783	3.15509e-08	252	281	488	1191	591	1135	105.266	97.273	105.233	309.906	154.228	297.465	K00036 glucose-6-phosphate 1-dehydrogenase [EC:1.1.1.49 1.1.1.363]
MSMEG_5497	4.45478	4.39957e-07	0.62686	3.16819e-08	1	0	0	14	14	15	0.418	0	0	3.643	3.653	3.931	conserved hypothetical protein
MSMEG_1170	2.62414	4.40416e-07	0.543797	3.17841e-08	7	11	10	51	59	51	2.924	3.808	2.156	13.271	15.397	13.366	conserved domain protein
MSMEG_6305	4.03469	4.53752e-07	7.09608	3.28177e-08	22	8	24	354	135	319	9.19	2.769	5.175	92.113	35.23	83.605	conserved hypothetical protein
MSMEG_6238	-4.41672	5.47671e-07	2.14731	4.00399e-08	25	57	70	0	2	7	10.443	19.732	15.095	0	0.522	1.835	putative two-component system sensor kinase
MSMEG_1785	2.15983	5.87987e-07	4.24581	4.31719e-08	9	11	20	65	46	56	3.759	3.808	4.313	16.913	12.004	14.677	hypothetical protein
MSMEG_1758	3.85597	6.02674e-07	6.52678	4.43448e-08	9	9	11	179	72	179	3.759	3.116	2.372	46.577	18.789	46.913	hypothetical protein
MSMEG_0520	1.7305	6.46079e-07	5.87968	4.79441e-08	38	36	72	163	123	153	15.873	12.462	15.526	42.414	32.098	40.099	porin
MSMEG_6891	-2.05329	6.47991e-07	2.67035	4.81876e-08	60	96	147	21	27	17	25.063	33.232	31.699	5.464	7.046	4.455	pseudogene
MSMEG_1171	3.74962	6.58687e-07	1.01473	4.9293e-08	8	5	17	114	124	122	3.342	1.731	3.666	29.663	32.359	31.974	Low molecular weight phosphotyrosine protein phosphatase
MSMEG_4500	2.06445	6.87302e-07	1.17659	5.17579e-08	37	60	59	286	124	214	15.456	20.77	12.723	74.419	32.359	56.086	hypothetical protein
MSMEG_3288	2.36452	6.97839e-07	2.51388	5.26609e-08	6	8	16	52	45	46	2.506	2.769	3.45	13.531	11.743	12.056	LysM domain protein
MSMEG_0014	-2.3782	7.78829e-07	0.80567	5.95058e-08	40	69	82	12	14	7	16.709	23.886	17.683	3.122	3.653	1.835	K00604 methionyl-tRNA formyltransferase [EC:2.1.2.9]
MSMEG_5558	2.01335	8.08027e-07	2.05664	6.19902e-08	10	17	16	59	44	57	4.177	5.885	3.45	15.352	11.482	14.939	hypothetical protein
MSMEG_0489	3.35917	8.08069e-07	1.09523	6.21201e-08	2	1	3	25	14	31	0.835	0.346	0.647	6.505	3.653	8.125	racemase
MSMEG_1801	2.66854	8.11663e-07	6.5918	6.25237e-08	21	17	30	201	72	156	8.772	5.885	6.469	52.301	18.789	40.885	hypothetical protein
MSMEG_1225	1.59793	1.04516e-06	3.45604	8.14943e-08	31	29	41	96	87	94	12.949	10.039	8.841	24.98	22.704	24.636	conserved hypothetical protein
MSMEG_6637	-2.77268	1.04964e-06	1.04584	8.20084e-08	73	95	121	12	22	7	30.494	32.886	26.093	3.122	5.741	1.835	hypothetical protein
MSMEG_0602	2.1456	1.15308e-06	5.37477	9.0854e-08	53	48	62	339	129	233	22.139	16.616	13.37	88.21	33.664	61.065	hypothetical protein
MSMEG_1065	2.64834	1.46673e-06	1.8994	1.17127e-07	16	11	23	122	62	112	6.684	3.808	4.96	31.745	16.18	29.353	conserved hypothetical protein
MSMEG_5483	-1.67399	1.74257e-06	3.51757	1.41067e-07	80	110	203	33	36	39	33.418	38.079	43.775	8.587	9.395	10.221	porin
MSMEG_3560	2.08587	1.85466e-06	6.51549	1.51015e-07	30	22	47	152	87	149	12.532	7.616	10.135	39.551	22.704	39.05	conserved hypothetical protein
MSMEG_3323	1.65523	1.97267e-06	5.04795	1.6248e-07	181	146	161	566	379	473	75.607	50.541	34.718	147.277	98.904	123.966	conserved hypothetical protein
MSMEG_5499	3.49564	2.10103e-06	0.582125	1.73383e-07	8	1	8	57	43	49	3.342	0.346	1.725	14.832	11.221	12.842	conserved hypothetical protein
MSMEG_2751	2.44123	2.18946e-06	2.9801	1.82054e-07	8	3	10	33	33	35	3.342	1.039	2.156	8.587	8.612	9.173	hypothetical protein
MSMEG_5551	1.65047	2.56104e-06	2.90417	2.17371e-07	21	24	33	87	63	76	8.772	8.308	7.116	22.638	16.441	19.918	stas domain protein
MSMEG_3420	1.77526	2.60122e-06	3.30422	2.21189e-07	18	14	29	70	61	58	7.519	4.846	6.254	18.214	15.919	15.201	K00046 gluconate 5-dehydrogenase [EC:1.1.1.69]
MSMEG_0278	3.02512	2.80515e-06	3.98906	2.3985e-07	4	3	7	46	42	26	1.671	1.039	1.509	11.969	10.96	6.814	hypothetical protein
MSMEG_3271	2.23977	3.17381e-06	5.58024	2.72866e-07	40	55	81	210	312	243	16.709	19.039	17.467	54.643	81.42	63.686	K20902 D-erythrulose 4-kinase [EC:2.7.1.210]
MSMEG_2122	1.63611	3.18154e-06	4.8852	2.7403e-07	20	12	32	52	63	60	8.354	4.154	6.901	13.531	16.441	15.725	K05879 phosphoenolpyruvate---glycerone phosphotransferase subunit DhaL [EC:2.7.1.121]
MSMEG_1761	1.85838	3.24759e-06	7.03353	2.81247e-07	11	15	25	60	44	69	4.595	5.193	5.391	15.612	11.482	18.084	integral membrane protein
MSMEG_0436	1.85006	3.2662e-06	7.89488	2.83371e-07	183	259	374	623	1534	730	76.443	89.658	80.65	162.108	400.314	191.321	allophanate hydrolase subunit 1
MSMEG_1844	1.67115	3.29241e-06	5.42776	2.86161e-07	19	24	31	77	57	85	7.937	8.308	6.685	20.036	14.875	22.277	conserved hypothetical protein
MSMEG_3680	1.69335	3.84574e-06	3.75015	3.37272e-07	48	47	62	236	104	147	20.051	16.27	13.37	61.409	27.14	38.526	hypothetical protein
MSMEG_0584	2.43099	4.60871e-06	2.4466	4.09245e-07	29	30	28	91	271	107	12.114	10.385	6.038	23.679	70.72	28.043	hypothetical protein
MSMEG_5574	1.82657	4.9172e-06	6.23752	4.38802e-07	29	46	69	172	136	156	12.114	15.924	14.879	44.755	35.491	40.885	K10227 polyol transport system substrate-binding protein
MSMEG_3272	2.38724	5.33204e-06	3.20662	4.81004e-07	10	16	11	48	74	53	4.177	5.539	2.372	12.49	19.311	13.89	K01808 ribose 5-phosphate isomerase B [EC:5.3.1.6]
MSMEG_0535	1.82657	5.56343e-06	3.12038	5.02751e-07	7	9	16	38	30	38	2.924	3.116	3.45	9.888	7.829	9.959	GntR-family protein transcriptional regulator
MSMEG_0519	1.60121	5.72434e-06	3.86366	5.19305e-07	11	20	32	62	60	51	4.595	6.923	6.901	16.133	15.658	13.366	conserved hypothetical protein
MSMEG_3559	1.83571	5.72434e-06	5.43418	5.19987e-07	14	17	21	61	41	74	5.848	5.885	4.528	15.873	10.699	19.394	short chain dehydrogenase
MSMEG_4524	-1.85605	5.85068e-06	0.731444	5.3697e-07	33	63	73	11	16	14	13.785	21.809	15.742	2.862	4.175	3.669	K04781 salicylate synthetase [EC:5.4.4.2 4.2.99.21]
MSMEG_0016	-2.92658	6.35013e-06	0.00648552	5.85798e-07	10	18	38	4	2	1	4.177	6.231	8.194	1.041	0.522	0.262	K05375 MbtH protein
MSMEG_3199	2.43908	7.89591e-06	6.16967	7.38306e-07	345	313	373	2794	644	2925	144.114	108.351	80.434	727.016	168.059	766.595	K03517 quinolinate synthase [EC:2.5.1.72]
MSMEG_4618	2.1412	9.02593e-06	5.36628	8.53881e-07	33	25	42	182	82	155	13.785	8.654	9.057	47.358	21.399	40.623	isochorismatase family protein
MSMEG_2171	2.86519	9.0791e-06	4.41368	8.60335e-07	3	2	11	41	25	34	1.253	0.692	2.372	10.668	6.524	8.911	L-carnitine dehydratase/bile acid-inducible protein F
MSMEG_5389	1.73314	9.37487e-06	4.51515	8.89833e-07	13	10	34	71	46	50	5.43	3.462	7.332	18.475	12.004	13.104	LysA protein
MSMEG_1212	-3.21392	1.12148e-05	-0.0881752	1.07855e-06	3	4	7	0	0	0	1.253	1.385	1.509	0	0	0	hypothetical protein
MSMEG_0649	2.53283	1.47475e-05	0.13623	1.453e-06	2	5	7	21	22	36	0.835	1.731	1.509	5.464	5.741	9.435	K02044 phosphonate transport system substrate-binding protein
MSMEG_1810	-1.98689	1.51089e-05	4.6455	1.49335e-06	28	44	79	8	10	16	11.696	15.231	17.036	2.082	2.61	4.193	hypothetical protein
MSMEG_5133	3.06905	1.54168e-05	-0.991064	1.52862e-06	0	1	4	12	18	8	0	0.346	0.863	3.122	4.697	2.097	hypothetical protein
MSMEG_1079	3.43848	1.58395e-05	0.319802	1.57799e-06	2	2	2	27	23	23	0.835	0.692	0.431	7.026	6.002	6.028	hypothetical protein
MSMEG_6563	-1.64885	1.61972e-05	1.36311	1.62378e-06	91	128	182	28	44	45	38.013	44.31	39.247	7.286	11.482	11.794	dihydrokaempferol 4-reductase
MSMEG_3710	-2.76948	1.83797e-05	1.14095	1.85123e-06	25	62	87	6	7	8	10.443	21.462	18.761	1.561	1.827	2.097	cytochrome b561 family protein
MSMEG_6764	1.76677	1.83898e-05	1.52119	1.85513e-06	35	25	29	95	103	69	14.62	8.654	6.254	24.72	26.879	18.084	transcriptional regulator, TetR family protein
MSMEG_0534	1.70755	1.97268e-05	1.45726	2.01787e-06	11	22	30	62	61	63	4.595	7.616	6.469	16.133	15.919	16.511	permease, major facilitator family protein
MSMEG_1297	1.64894	2.02596e-05	6.44705	2.0819e-06	35	45	69	167	119	143	14.62	15.578	14.879	43.454	31.054	37.478	K18456 8-oxoguanine deaminase [EC:3.5.4.32]
MSMEG_2128	-2.57628	2.04234e-05	-0.366084	2.10515e-06	26	18	35	5	7	1	10.861	6.231	7.547	1.301	1.827	0.262	K21992 lysine N-acyltransferase [EC:2.3.1.-]
MSMEG_1847	2.03853	2.05232e-05	5.82319	2.11865e-06	9	9	17	59	34	44	3.759	3.116	3.666	15.352	8.873	11.532	K00124 formate dehydrogenase iron-sulfur subunit
MSMEG_1755	1.73318	2.49055e-05	3.53895	2.63356e-06	26	54	48	181	81	138	10.861	18.693	10.351	47.097	21.138	36.168	anti-sigm factor, ChrR
MSMEG_3270	2.23182	2.6008e-05	4.07903	2.76238e-06	18	21	25	84	128	71	7.519	7.27	5.391	21.857	33.403	18.608	SN-glycerol-3-phosphate ABC transporter, ATP-binding protein
MSMEG_6177	2.47815	2.77278e-05	1.72257	2.97976e-06	8	10	6	26	49	49	3.342	3.462	1.294	6.765	12.787	12.842	K01684 galactonate dehydratase [EC:4.2.1.6]
MSMEG_4706	1.59189	3.03753e-05	1.98349	3.29297e-06	16	24	47	90	70	76	6.684	8.308	10.135	23.419	18.267	19.918	K14219 tRNA Arg
MSMEG_6237	-2.07098	3.65539e-05	2.28955	4.07174e-06	34	53	58	11	9	10	14.202	18.347	12.507	2.862	2.349	2.621	conserved hypothetical protein
MSMEG_2130	-2.07174	4.14421e-05	1.44819	4.68126e-06	31	44	86	13	10	10	12.949	15.231	18.545	3.383	2.61	2.621	K00257 acyl-ACP dehydrogenase [EC:1.3.99.-]
MSMEG_0435	1.62467	4.2887e-05	8.53496	4.8512e-06	303	408	552	793	2049	1028	126.569	141.237	119.034	206.343	534.709	269.422	allophanate hydrolase subunit 2
MSMEG_4351	1.79049	4.43926e-05	3.18873	5.04936e-06	37	52	77	282	96	195	15.456	18.001	16.604	73.378	25.052	51.106	K00059 3-oxoacyl-[acyl-carrier protein] reductase [EC:1.1.1.100]
MSMEG_6464	-1.65128	5.34328e-05	0.263689	6.22013e-06	25	27	45	8	11	8	10.443	9.347	9.704	2.082	2.871	2.097	conserved hypothetical protein
MSMEG_6241	-3.68335	7.37161e-05	4.79625	8.78949e-06	53	81	114	2	7	10	22.139	28.04	24.583	0.52	1.827	2.621	ATPase associated with various cellular activities, AAA-5
MSMEG_3410	1.75822	8.74695e-05	3.12626	1.0594e-05	15	10	13	45	30	41	6.266	3.462	2.803	11.709	7.829	10.745	transcriptional regulator, TetR family protein
MSMEG_2967	2.46925	9.76747e-05	0.787318	1.20752e-05	2	2	1	10	7	14	0.835	0.692	0.216	2.602	1.827	3.669	conserved hypothetical protein
MSMEG_6536	-1.73441	9.99875e-05	1.23191	1.24239e-05	13	19	33	5	8	4	5.43	6.577	7.116	1.301	2.088	1.048	K01607 4-carboxymuconolactone decarboxylase [EC:4.1.1.44]
MSMEG_6675	2.8426	0.000110613	2.62567	1.39351e-05	0	3	6	24	12	14	0	1.039	1.294	6.245	3.132	3.669	hypothetical protein
MSMEG_6242	-3.41394	0.000121845	4.16299	1.54507e-05	41	49	79	4	4	5	17.127	16.962	17.036	1.041	1.044	1.31	K17067 formaldehyde dismutase / methanol dehydrogenase [EC:1.2.98.1 1.1.99.37]
MSMEG_4509	1.65111	0.000130921	1.35035	1.68016e-05	12	16	32	64	53	54	5.013	5.539	6.901	16.653	13.831	14.153	K04793 mycobactin lysine-N-oxygenase
MSMEG_2342	1.71205	0.000141641	2.75975	1.83773e-05	7	17	20	29	54	51	2.924	5.885	4.313	7.546	14.092	13.366	putative glycosyltransferase
MSMEG_1674	-2.52292	0.000209453	-1.1594	2.83257e-05	5	7	10	2	1	0	2.089	2.423	2.156	0.52	0.261	0	hypothetical protein
MSMEG_1846	1.66267	0.000212473	5.77562	2.88341e-05	15	11	25	45	45	56	6.266	3.808	5.391	11.709	11.743	14.677	polysulphide reductase, NrfD
MSMEG_4319	1.85025	0.000235178	2.85178	3.22475e-05	21	10	29	65	48	77	8.772	3.462	6.254	16.913	12.526	20.18	K14237 tRNA Val
MSMEG_2132	-2.3508	0.000295148	-0.586656	4.16281e-05	13	10	23	1	2	5	5.43	3.462	4.96	0.26	0.522	1.31	K02078 acyl carrier protein
MSMEG_0817	1.81312	0.000362363	2.69348	5.2359e-05	6	8	10	34	18	31	2.506	2.769	2.156	8.847	4.697	8.125	LysR-family protein transcriptional regulator
MSMEG_1081	2.27073	0.000471835	-0.431896	7.08419e-05	1	4	3	15	12	11	0.418	1.385	0.647	3.903	3.132	2.883	hypothetical protein
MSMEG_3566	-1.66246	0.000599307	1.4154	9.38357e-05	43	52	87	19	21	12	17.962	18.001	18.761	4.944	5.48	3.145	FadD16 protein
MSMEG_5576	1.68909	0.000742085	5.91798	0.00011947	87	89	105	353	180	328	36.342	30.809	22.642	91.853	46.973	85.963	K00045 mannitol 2-dehydrogenase [EC:1.1.1.67]
MSMEG_5862	-3.11283	0.000857715	0.405522	0.000141831	6	12	11	0	1	1	2.506	4.154	2.372	0	0.261	0.262	short chain dehydrogenase
MSMEG_3324	1.91119	0.00091745	0.524917	0.000153724	3	7	13	25	35	19	1.253	2.423	2.803	6.505	9.134	4.98	hypothetical protein
MSMEG_5572	1.68112	0.000935305	3.86988	0.000157596	9	12	12	35	23	43	3.759	4.154	2.588	9.107	6.002	11.27	K10229 polyol transport system permease protein
MSMEG_6021	-1.73839	0.0011804	2.1393	0.000203523	10	10	19	3	2	5	4.177	3.462	4.097	0.781	0.522	1.31	K01805 xylose isomerase [EC:5.3.1.5]
MSMEG_4391	2.96695	0.00155916	0.249395	0.000276657	0	1	1	9	10	4	0	0.346	0.216	2.342	2.61	1.048	acyl-CoA dehydrogenase-family protein
MSMEG_5874	1.85856	0.00181255	1.92026	0.000328443	5	2	12	29	18	13	2.089	0.692	2.588	7.546	4.697	3.407	K14234 tRNA Thr
MSMEG_1273	1.80925	0.00197861	3.78053	0.00036257	3	8	10	23	22	22	1.253	2.769	2.156	5.985	5.741	5.766	conserved hypothetical protein
MSMEG_0779	-1.61421	0.002172	2.0521	0.000403459	32	40	50	13	15	8	13.367	13.847	10.782	3.383	3.914	2.097	K00059 3-oxoacyl-[acyl-carrier protein] reductase [EC:1.1.1.100]
MSMEG_3520	-2.53263	0.00220542	-0.547384	0.000410705	7	12	15	0	3	3	2.924	4.154	3.235	0	0.783	0.786	TetR-family protein transcriptional regulator
MSMEG_1759	2.73768	0.00220752	3.34883	0.000411442	1	0	0	3	3	7	0.418	0	0	0.781	0.783	1.835	hypothetical protein
MSMEG_3329	2.37973	0.0023643	1.69697	0.000444743	4	0	4	10	11	9	1.671	0	0.863	2.602	2.871	2.359	hypothetical protein
MSMEG_1263	1.80061	0.00242326	4.32665	0.000457736	3	12	11	39	16	29	1.253	4.154	2.372	10.148	4.175	7.6	conserved hypothetical protein
MSMEG_2534	-1.85785	0.00296203	0.527109	0.000580417	10	23	37	2	6	11	4.177	7.962	7.979	0.52	1.566	2.883	putative carboxylesterase protein
MSMEG_4047	1.59185	0.00305253	2.06031	0.000599588	3	4	5	13	10	13	1.253	1.385	1.078	3.383	2.61	3.407	K06897 7,8-dihydropterin-6-yl-methyl-4-(beta-D-ribofuranosyl)aminobenzene 5'-phosphate synthase
MSMEG_2005	-1.81549	0.00358295	0.115149	0.000718951	18	13	24	6	6	2	7.519	4.5	5.175	1.561	1.566	0.524	sugar phosphate isomerase/epimerase
MSMEG_6034	2.26207	0.0042639	1.50286	0.000876997	1	1	2	8	4	13	0.418	0.346	0.431	2.082	1.044	3.407	hypothetical protein
MSMEG_5931	-1.5905	0.00683575	-0.109103	0.00151429	16	19	34	3	8	11	6.684	6.577	7.332	0.781	2.088	2.883	short chain dehydrogenase
MSMEG_2858	1.69834	0.00833738	1.18282	0.0019228	3	3	5	11	10	15	1.253	1.039	1.078	2.862	2.61	3.931	K02067 phospholipid/cholesterol/gamma-HCH transport system substrate-binding protein
MSMEG_4015	2.36619	0.00865969	0.106169	0.00201887	0	0	2	5	5	2	0	0	0.431	1.301	1.305	0.524	hypothetical protein
MSMEG_6861	1.95317	0.00907712	1.74099	0.00214182	2	0	2	3	5	7	0.835	0	0.431	0.781	1.305	1.835	cupin domain protein

## Sheet: WT vs MUT 0.1% glucose
Supplementary Table
total RNA sequencing
gene	Log2-transformed Fold Change (Log2FC) values for expression in MSMEG6238/6236 double mutant strain versus wild-type control	False Discovery Rate (FDR)	Log2-transformed Average Expression	p value ↓	raw read count						CPM-transformed values
					WT_1	WT_2	WT_3	MUT_1	MUT_2	MUT_3	WT_1	WT_2	WT_3	MUT_1	MUT_2	MUT_3	annotation
MSMEG_6236	-5.3655	2.49442e-06	2.31165	7.82687e-10	38	18	34	1	0	0	20.801	14.504	25.024	0.501	0	0	two-component system, regulatory protein
MSMEG_6238	-5.46972	1.32277e-05	2.14731	7.33205e-09	52	23	40	2	0	0	28.465	18.532	29.44	1.003	0	0	putative two-component system sensor kinase
MSMEG_1543	-1.72719	2.06539e-05	7.02691	1.68562e-08	286	143	189	75	68	42	156.555	115.223	139.106	37.603	36.991	32.538	K00138 aldehyde dehydrogenase [EC:1.2.1.-]
MSMEG_6239	-2.57975	2.06539e-05	4.79877	1.9442e-08	136	51	64	15	12	12	74.446	41.094	47.105	7.521	6.528	9.297	1,3-propanediol dehydrogenase
MSMEG_6242	-4.12158	0.000766214	4.16299	1.08188e-06	112	39	77	1	2	22	61.308	31.424	56.673	0.501	1.088	17.044	K17067 formaldehyde dismutase / methanol dehydrogenase [EC:1.2.98.1 1.1.99.37]
MSMEG_6241	-4.10961	0.00158999	4.79625	2.74395e-06	148	44	71	1	2	33	81.015	35.453	52.257	0.501	1.088	25.565	ATPase associated with various cellular activities, AAA-5
MSMEG_1546	-1.68388	0.00203704	5.18932	3.83503e-06	103	61	82	31	24	21	56.382	49.151	60.353	15.543	13.056	16.269	K13920 propanediol dehydratase small subunit [EC:4.2.1.28]
MSMEG_0733	-3.08545	0.00434567	1.48208	9.54494e-06	3	6	3	0	0	0	1.642	4.835	2.208	0	0	0	K00215 4-hydroxy-tetrahydrodipicolinate reductase [EC:1.17.1.8]

## Sheet: WT vs MUT 1,3-propanediol
Supplementary Table
total RNA sequencing
gene	Log2-transformed Fold Change (Log2FC) values for expression in MSMEG6238/6236 double mutant strain versus wild-type control	False Discovery Rate (FDR)	Log2-transformed Average Expression	p value ↓	raw read count						CPM-transformed values
					WT_1	WT_2	WT_3	MUT_1	MUT_2	MUT_3	WT_1	WT_2	WT_3	MUT_1	MUT_2	MUT_3	annotation
MSMEG_1421	-4.67753	6.42874e-16	7.13529	2.77794e-19	9752	7544	7833	73	86	103	3157	3563.57	2928	54.702	68.59	69.522	K24694 mycofactocin precursor peptide MftA
MSMEG_3615	3.39669	6.42874e-16	7.88371	6.05153e-19	401	263	267	841	919	825	129.815	124.234	99.805	630.201	732.951	556.853	K13953 alcohol dehydrogenase, propanol-preferring [EC:1.1.1.1]
MSMEG_3616	3.13664	6.42874e-16	9.15206	1.35953e-19	1078	702	833	2040	2084	1950	348.979	331.605	311.378	1528.67	1662.1	1316.2	integral membrane protein
MSMEG_4710	4.30645	6.42874e-16	7.04158	4.16988e-19	131	96	91	502	628	549	42.408	45.348	34.016	376.172	500.863	370.56	K09699 2-oxoisovalerate dehydrogenase E2 component (dihydrolipoyl transacylase) [EC:2.3.1.168]
MSMEG_5140	3.55499	6.42874e-16	7.22772	3.5279e-19	721	583	603	1682	2042	2307	233.408	275.393	225.403	1260.4	1628.6	1557.16	K00370 nitrate reductase / nitrite oxidoreductase, alpha subunit [EC:1.7.5.1 1.7.99.-]
MSMEG_6398	-3.4895	6.42874e-16	8.8758	5.92798e-19	3802	2920	3599	73	80	91	1230.82	1379.33	1345.32	54.702	63.804	61.423	K18851 diacylglycerol O-acyltransferase / trehalose O-mycolyltransferase [EC:2.3.1.20 2.3.1.122]
MSMEG_5139	3.3775	8.69579e-16	5.44923	9.54981e-19	260	232	256	598	702	794	84.169	109.59	95.693	448.11	559.882	535.929	K00371 nitrate reductase / nitrite oxidoreductase, beta subunit [EC:1.7.5.1 1.7.99.-]
MSMEG_1761	3.38127	1.127e-15	7.03353	1.41449e-18	528	359	373	1107	1249	1119	170.928	169.582	139.428	829.527	996.144	755.295	integral membrane protein
MSMEG_0746	3.35045	1.2471e-15	5.69509	1.76089e-18	297	178	185	534	622	609	96.147	84.082	69.154	400.151	496.078	411.059	K03520 aerobic carbon-monoxide dehydrogenase large subunit [EC:1.2.5.3]
MSMEG_1424	-4.83598	1.70971e-15	7.78496	2.68232e-18	35127	23386	23026	192	262	308	11371.6	11046.9	8607.18	143.875	208.959	207.892	K24693 pre-mycofactocin synthase [EC:1.4.3.26]
MSMEG_0901	3.16487	2.94517e-15	8.38887	5.08265e-18	863	889	769	1957	1864	2239	279.377	419.939	287.454	1466.47	1486.64	1511.27	K09959 uncharacterized protein
MSMEG_4384	2.66449	3.5084e-15	7.89525	6.60509e-18	1692	1315	1461	2523	2543	2488	547.748	621.169	546.126	1890.6	2028.18	1679.33	Penicillin binding protein transpeptidase domain protein
MSMEG_4712	3.71881	5.02123e-15	5.29909	1.0241e-17	85	48	63	249	230	207	27.517	22.674	23.55	186.587	183.437	139.719	K00166 2-oxoisovalerate dehydrogenase E1 component subunit alpha [EC:1.2.4.4]
MSMEG_1422	-4.99605	5.96748e-15	6.75887	1.31071e-17	7136	5567	6465	39	41	90	2310.12	2629.69	2416.64	29.225	32.7	60.748	K24695 mycofactocin biosynthesis protein MftB
MSMEG_5138	3.37477	8.87244e-15	5.65656	2.14905e-17	153	116	145	346	352	457	49.53	54.795	54.201	259.274	280.739	308.463	K00373 nitrate reductase molybdenum cofactor assembly chaperone NarJ/NarW
MSMEG_5244	-3.81972	8.87244e-15	7.10573	2.23405e-17	2573	2255	2672	50	47	44	832.953	1065.2	998.801	37.467	37.485	29.699	K07695 two-component system, NarL family, response regulator DevR
MSMEG_6535	3.52482	8.87244e-15	5.77243	2.36636e-17	277	172	180	551	757	611	89.673	81.248	67.284	412.89	603.748	412.409	K02355 elongation factor G
MSMEG_2837	2.95167	1.11429e-14	8.22159	3.32155e-17	847	576	651	1158	1585	1546	274.198	272.086	243.346	867.744	1264.12	1043.51	nitrate reductase NarB
MSMEG_5242	-3.81081	1.11429e-14	8.55668	3.15832e-17	10659	8248	9286	111	228	221	3450.62	3896.12	3471.13	83.178	181.842	149.169	K00635 diacylglycerol O-acyltransferase / wax synthase [EC:2.3.1.20 2.3.1.75]
MSMEG_0228	2.95034	1.32938e-14	6.41135	4.37981e-17	259	223	251	424	496	612	83.846	105.339	93.824	317.723	395.586	413.084	K01768 adenylate cyclase [EC:4.6.1.1]
MSMEG_3950	-3.37805	1.32938e-14	9.1021	4.37587e-17	15002	9568	11131	199	375	364	4856.57	4519.65	4160.8	149.12	299.082	245.69	universal stress protein family protein
MSMEG_0415	3.34813	1.78301e-14	7.91916	6.43383e-17	270	181	238	728	711	462	87.407	85.499	88.965	545.525	567.06	311.838	NADH-fmn oxidoreductase
MSMEG_5245	-3.57303	1.78301e-14	8.48852	6.25365e-17	8175	5969	6341	114	190	161	2646.48	2819.59	2370.28	85.426	151.535	108.671	universal stress protein family protein
MSMEG_3945	-4.13329	1.93057e-14	7.76849	7.26916e-17	7730	5463	5799	60	125	113	2502.42	2580.57	2167.68	44.961	99.694	76.272	universal stress protein family protein
MSMEG_1361	2.46368	2.38571e-14	9.20899	9.52911e-17	1863	1409	1423	1948	2410	2571	603.106	665.572	531.921	1459.73	1922.1	1735.36	alpha-mannosidase
MSMEG_1423	-4.90214	2.38571e-14	5.43975	9.73149e-17	6056	3751	4690	28	51	51	1960.5	1771.87	1753.13	20.982	40.675	34.424	K24696 [mycofactocin precursor peptide]-tyrosine decarboxylase / 3-amino-5-[(4-hydroxyphenyl)methyl]
MSMEG_4711	4.22691	3.83383e-14	5.01782	1.62399e-16	66	46	54	286	303	247	21.366	21.729	20.185	214.313	241.659	166.718	K00167 2-oxoisovalerate dehydrogenase E1 component subunit beta [EC:1.2.4.4]
MSMEG_0963	3.23748	3.87898e-14	8.18543	1.79905e-16	895	709	741	1987	1976	1937	289.737	334.912	276.988	1488.95	1575.96	1307.42	hypothetical protein
MSMEG_0988	2.07671	3.87898e-14	9.19926	1.93296e-16	2165	1748	1903	2315	2021	2225	700.872	825.706	711.347	1734.74	1611.86	1501.82	K02548 1,4-dihydroxy-2-naphthoate polyprenyltransferase [EC:2.5.1.74]
MSMEG_1392	-3.49031	3.87898e-14	3.2495	1.9474e-16	5717	4096	4941	101	115	133	1850.75	1934.84	1846.96	75.684	91.719	89.771	alcohol dehydrogenase, class IV
MSMEG_5241	-3.00897	3.87898e-14	7.97325	1.81034e-16	6269	4613	5402	146	159	245	2029.45	2179.05	2019.28	109.405	126.811	165.368	K07682 two-component system, NarL family, sensor histidine kinase DevS [EC:2.7.13.3]
MSMEG_6158	-3.84137	3.87898e-14	6.6123	1.89905e-16	1622	1243	1399	20	26	33	525.087	587.158	522.95	14.987	20.736	22.274	conserved hypothetical protein
MSMEG_0597	2.46379	5.39223e-14	7.24548	2.9609e-16	330	251	281	405	409	455	106.83	118.565	105.039	303.486	326.199	307.113	conserved hypothetical protein
MSMEG_2121	2.77067	5.39223e-14	6.78544	2.8849e-16	215	146	150	247	309	380	69.602	68.966	56.07	185.089	246.444	256.49	K23993 multiphosphoryl transfer protein [EC:2.7.3.9 2.7.1.202]
MSMEG_2799	-6.44769	5.39223e-14	4.79168	2.87389e-16	1565	1052	1406	3	5	3	506.635	496.935	525.567	2.248	3.988	2.025	K01626 3-deoxy-7-phosphoheptulonate synthase [EC:2.5.1.54]
MSMEG_5506	3.13022	5.61963e-14	5.57281	3.17393e-16	49	46	55	107	120	124	15.863	21.729	20.559	80.18	95.706	83.697	hypothetical protein
MSMEG_0747	3.04188	6.18448e-14	4.67016	3.58999e-16	184	93	121	249	270	341	59.566	43.931	45.23	186.587	215.339	230.166	K07402 xanthine dehydrogenase accessory factor
MSMEG_6159	-2.78786	6.60991e-14	9.96039	3.94064e-16	8982	6420	8097	225	295	408	2907.73	3032.63	3026.68	168.603	235.278	275.389	K03704 cold shock protein
MSMEG_6678	2.92926	8.68253e-14	7.89923	5.3125e-16	917	774	933	2004	1605	1753	296.859	365.616	348.758	1501.69	1280.07	1183.23	conserved hypothetical protein
MSMEG_5826	2.71935	1.01456e-13	9.3194	6.36906e-16	1512	1070	1134	2087	2214	2188	489.477	505.438	423.892	1563.89	1765.78	1476.84	K00156 pyruvate dehydrogenase (quinone) [EC:1.2.5.1]
MSMEG_6500	2.64308	1.01456e-13	8.78013	6.52605e-16	1182	905	980	1630	1773	1704	382.647	427.497	366.327	1221.44	1414.06	1150.15	conserved hypothetical protein
MSMEG_1695	2.83628	1.03698e-13	8.61231	7.15833e-16	845	603	717	1489	1438	1201	273.55	284.84	268.017	1115.78	1146.88	810.643	K01840 phosphomannomutase [EC:5.4.2.8]
MSMEG_2343	2.79821	1.03698e-13	8.89839	7.0429e-16	962	810	888	1838	1619	1508	311.427	382.621	331.937	1377.3	1291.24	1017.86	methylesterase
MSMEG_5571	2.98362	1.03698e-13	6.57804	6.93032e-16	184	132	150	296	366	323	59.566	62.353	56.07	221.807	291.904	218.016	K10112 multiple sugar transport system ATP-binding protein [EC:7.5.2.-]
MSMEG_5790	-4.96472	1.07382e-13	6.59861	7.58108e-16	1750	1521	1642	9	11	24	566.524	718.478	613.784	6.744	8.773	16.199	SseC protein
MSMEG_1401	-3.65879	1.151e-13	7.65556	8.30659e-16	3366	2067	2515	31	63	81	1089.67	976.393	940.114	23.23	50.246	54.673	K02358 elongation factor Tu
MSMEG_0416	3.60725	1.33021e-13	8.48333	9.80861e-16	640	348	435	1926	1810	979	207.186	164.385	162.604	1443.24	1443.57	660.799	hypothetical protein
MSMEG_2701	3.00908	1.41473e-13	6.95591	1.06538e-15	221	177	196	529	453	323	71.544	83.61	73.265	396.405	361.292	218.016	hypothetical protein
MSMEG_6445	2.49402	1.45241e-13	6.83423	1.11654e-15	248	223	209	358	335	331	80.285	105.339	78.125	268.266	267.18	223.416	K04477 putative hydrolase
MSMEG_2375	2.56785	1.87408e-13	9.39692	1.49059e-15	892	750	755	1223	1342	1235	288.766	354.279	282.221	916.452	1070.32	833.592	K03809 NAD(P)H dehydrogenase (quinone) [EC:1.6.5.2]
MSMEG_3933	-4.11239	1.87408e-13	6.94775	1.4995e-15	4071	2811	3479	31	62	73	1317.9	1327.84	1300.46	23.23	49.448	49.273	K00635 diacylglycerol O-acyltransferase / wax synthase [EC:2.3.1.20 2.3.1.75]
MSMEG_0818	-3.88957	1.89842e-13	3.62335	1.54876e-15	1191	842	955	16	14	23	385.56	397.737	356.982	11.99	11.166	15.524	transporter, major facilitator family protein
MSMEG_4327	-3.68049	2.11181e-13	7.82944	1.75598e-15	3644	2372	2800	46	61	76	1179.67	1120.47	1046.65	34.47	48.651	51.298	K11609 meromycolic acid 3-oxoacyl-(acyl carrier protein) synthase I [EC:2.3.1.293]
MSMEG_5907	2.46925	2.14581e-13	4.89063	1.81792e-15	94	72	81	128	124	114	30.43	34.011	30.278	95.916	98.897	76.947	K22819 3-oxocholest-4-en-26-oyl-CoA dehydrogenase beta subunit [EC:1.3.99.-]
MSMEG_2059	3.14766	2.16135e-13	4.82691	1.88635e-15	438	435	388	1188	992	841	141.793	205.482	145.035	890.224	791.173	567.653	K00334 NADH-quinone oxidoreductase subunit E [EC:7.1.1.2]
MSMEG_3943	-3.4861	2.16135e-13	6.12945	1.89889e-15	1627	1121	1456	22	36	43	526.706	529.529	544.257	16.486	28.712	29.024	conserved hypothetical protein
MSMEG_5166	2.70518	2.45447e-13	5.3416	2.19493e-15	67	53	63	91	106	124	21.69	25.036	23.55	68.191	84.541	83.697	K14393 cation/acetate symporter
MSMEG_1400	-3.58155	2.55273e-13	7.68592	2.32285e-15	2099	1420	1768	22	41	61	679.506	670.768	660.883	16.486	32.7	41.173	pseudogene
MSMEG_0984	2.3995	2.61035e-13	5.9257	2.41623e-15	389	309	292	432	456	504	125.93	145.963	109.15	323.718	363.684	340.187	trap transporter, 4tm/12tm fusion protein
MSMEG_1760	2.15432	3.02325e-13	7.99628	2.84586e-15	581	515	490	636	632	619	188.086	243.272	183.163	476.585	504.054	417.808	short-chain dehydrogenase/reductase SDR
MSMEG_5135	-2.97951	3.33657e-13	7.32731	3.24549e-15	2550	1853	2431	61	74	97	825.507	875.305	908.714	45.71	59.019	65.472	hypothetical protein
MSMEG_6322	2.43365	3.33657e-13	8.04231	3.23299e-15	911	661	704	1121	1134	1015	294.916	312.238	263.157	840.018	904.425	685.098	K00635 diacylglycerol O-acyltransferase / wax synthase [EC:2.3.1.20 2.3.1.75]
MSMEG_3932	-6.16861	3.35443e-13	7.89151	3.31549e-15	17228	12016	14762	32	67	70	5577.19	5676.02	5518.08	23.979	53.436	47.248	K13993 HSP20 family protein
MSMEG_2057	2.76789	3.48484e-13	7.37754	3.49906e-15	2746	2106	2157	4921	4614	3348	888.958	994.815	806.292	3687.54	3679.91	2259.81	K00336 NADH-quinone oxidoreductase subunit G [EC:7.1.1.2]
MSMEG_2913	3.00736	3.78751e-13	9.11689	3.86238e-15	1337	990	1097	2563	2565	2216	432.825	467.648	410.062	1920.58	2045.72	1495.74	hydrolase
MSMEG_1847	2.98972	4.1158e-13	5.82319	4.26174e-15	130	97	108	211	250	251	42.085	45.82	40.371	158.112	199.388	169.418	K00124 formate dehydrogenase iron-sulfur subunit
MSMEG_0280	2.6432	4.36223e-13	9.3613	4.62089e-15	3712	2699	2638	4849	5380	4761	1201.68	1274.93	986.092	3633.58	4290.84	3213.55	alpha/beta hydrolase fold
MSMEG_1906	3.06982	4.36223e-13	4.46638	4.79066e-15	55	47	54	115	121	115	17.805	22.201	20.185	86.175	96.504	77.622	K05784 benzoate/toluate 1,2-dioxygenase reductase component [EC:1.18.1.-]
MSMEG_4576	2.54625	4.36223e-13	6.37556	4.69954e-15	265	159	188	343	334	269	85.788	75.107	70.275	257.026	266.383	181.568	SpfH domain protein
MSMEG_6241	-11.1596	4.36223e-13	4.79625	4.74153e-15	57841	41805	44294	14	3	3	18724.8	19747.5	16557.2	10.491	2.393	2.025	ATPase associated with various cellular activities, AAA-5
MSMEG_3312	2.97945	4.86904e-13	6.83108	5.42363e-15	272	156	203	414	445	448	88.054	73.69	75.882	310.23	354.911	302.388	hemerythrin HHE cation binding domain subfamily protein, putative
MSMEG_3477	2.13206	5.96261e-13	6.76942	6.7353e-15	156	109	146	149	169	161	50.502	51.489	54.575	111.653	134.786	108.671	possible inv protein
MSMEG_3254	2.1941	6.73086e-13	10.9682	7.70871e-15	4662	3159	3977	3703	5324	5485	1509.22	1492.22	1486.61	2774.83	4246.17	3702.23	RDD family protein, putative
MSMEG_3673	2.40241	7.39128e-13	9.51676	8.58103e-15	2256	1682	1842	2343	2870	2958	730.331	794.53	688.545	1755.72	2288.98	1996.57	K00705 4-alpha-glucanotransferase [EC:2.4.1.25]
MSMEG_2711	5.07874	7.49003e-13	5.5837	8.93069e-15	109	67	76	376	894	1262	35.286	31.649	28.409	281.755	713.012	851.816	K04656 hydrogenase maturation protein HypF
MSMEG_3955	-3.31304	7.49003e-13	7.95537	8.86679e-15	8303	5658	5821	121	194	225	2687.91	2672.68	2175.91	90.671	154.725	151.869	conserved hypothetical protein
MSMEG_6240	-10.6071	7.80167e-13	4.13543	9.42468e-15	17012	13031	14538	9	0	3	5507.26	6155.48	5434.34	6.744	0	2.025	K07161 uncharacterized protein
MSMEG_5605	2.81865	7.95537e-13	9.63106	9.73516e-15	2207	1563	1591	2939	3574	3537	714.468	738.317	594.72	2202.33	2850.45	2387.38	K00425 cytochrome bd ubiquinol oxidase subunit I [EC:7.1.1.7]
MSMEG_0732	2.18986	8.76594e-13	7.3164	1.09758e-14	433	342	363	497	465	426	140.174	161.551	135.69	372.426	370.862	287.539	K03695 ATP-dependent Clp protease ATP-binding subunit ClpB
MSMEG_6935	1.94654	8.76594e-13	10.0832	1.10021e-14	2310	1842	2162	1809	2240	2500	747.812	870.109	808.161	1355.57	1786.52	1687.43	K01448 N-acetylmuramoyl-L-alanine amidase [EC:3.5.1.28]
MSMEG_1844	3.02737	9.33344e-13	5.42776	1.21537e-14	71	48	69	153	139	119	22.985	22.674	25.792	114.65	110.86	80.322	conserved hypothetical protein
MSMEG_5406	2.45348	9.33344e-13	9.05135	1.21244e-14	963	574	814	1239	1133	1020	311.75	271.141	304.275	928.441	903.628	688.473	hypothetical protein
MSMEG_5570	2.53303	9.33344e-13	8.82299	1.20918e-14	948	701	758	1074	1294	1354	306.894	331.133	283.342	804.799	1032.03	913.914	K01971 bifunctional non-homologous end joining protein LigD [EC:6.5.1.1]
MSMEG_0065	-4.00371	9.48828e-13	6.27435	1.25042e-14	1636	967	1327	12	31	24	529.619	456.784	496.036	8.992	24.724	16.199	K14956 ESAT-6 family protein
MSMEG_1757	2.31281	9.75477e-13	9.43959	1.30084e-14	2220	1611	1849	2459	2729	2331	718.677	760.991	691.161	1842.64	2176.52	1573.36	K03724 ATP-dependent helicase Lhr and Lhr-like helicase [EC:5.6.2.6 5.6.2.4]
MSMEG_3311	2.67124	9.76256e-13	7.11063	1.3172e-14	434	249	329	490	594	612	140.498	117.621	122.981	367.18	473.747	413.084	acyl carrier protein
MSMEG_0522	2.99375	9.9663e-13	6.46281	1.37124e-14	215	145	161	367	351	383	69.602	68.494	60.182	275.01	279.941	258.515	pp24 protein
MSMEG_4757	-2.60483	9.9663e-13	9.5065	1.37596e-14	5903	3933	4094	195	215	193	1910.97	1857.84	1530.35	146.123	171.474	130.27	K11533 fatty acid synthase, bacteria type [EC:2.3.1.-]
MSMEG_0821	-4.85903	1.08201e-12	3.28696	1.53867e-14	890	692	725	5	8	7	288.118	326.881	271.007	3.747	6.38	4.725	K02433 aspartyl-tRNA(Asn)/glutamyl-tRNA(Gln) amidotransferase subunit A [EC:6.3.5.6 6.3.5.7]
MSMEG_3614	3.45804	1.08201e-12	3.97842	1.52836e-14	23	24	24	58	72	81	7.446	11.337	8.971	43.462	57.424	54.673	hypothetical protein
MSMEG_4991	2.25057	1.08201e-12	8.9944	1.54475e-14	1297	980	1040	1117	1456	1685	419.875	462.924	388.755	837.021	1161.24	1137.33	hypothetical protein
MSMEG_3944	-4.15268	1.13029e-12	5.45831	1.63141e-14	1107	759	1094	11	15	17	358.367	358.53	408.94	8.243	11.963	11.475	K07695 two-component system, NarL family, response regulator DevR
MSMEG_6242	-11.9696	1.13444e-12	4.16299	1.65521e-14	34402	18681	24826	6	0	1	11136.9	8824.38	9280.03	4.496	0	0.675	K17067 formaldehyde dismutase / methanol dehydrogenase [EC:1.2.98.1 1.1.99.37]
MSMEG_1774	2.53977	1.17696e-12	8.54132	1.73571e-14	758	488	674	849	1162	960	245.386	230.517	251.943	636.196	926.757	647.974	conserved hypothetical protein
MSMEG_0523	2.61103	1.19466e-12	6.68135	1.78056e-14	213	173	162	274	297	322	68.954	81.72	60.556	205.321	236.873	217.341	DNA-binding protein
MSMEG_3949	-5.56256	1.19729e-12	4.00927	1.80326e-14	859	664	833	4	3	5	278.083	313.655	311.378	2.997	2.393	3.375	hypothetical protein
MSMEG_1425	-2.16971	1.23906e-12	7.01948	1.90505e-14	3560	2450	3055	145	164	234	1152.47	1157.31	1141.97	108.655	130.799	157.944	K24697 mycofactocin precursor peptide peptidase [EC:3.4.14.14]
MSMEG_5473	1.94298	1.23906e-12	6.77483	1.88773e-14	381	271	299	310	323	338	123.34	128.013	111.767	232.298	257.61	228.141	K11735 GABA permease
MSMEG_2051	2.71095	1.30444e-12	5.24338	2.02603e-14	485	343	368	757	832	528	157.008	162.024	137.559	567.256	663.564	356.386	K00342 NADH-quinone oxidoreductase subunit M [EC:7.1.1.2]
MSMEG_3867	2.98428	1.41496e-12	4.61309	2.2199e-14	91	66	60	100	181	191	29.459	31.177	22.428	74.935	144.357	128.92	ATPase family protein associated with various cellular activities (AAA)
MSMEG_3008	2.28285	1.43085e-12	7.45563	2.26728e-14	1156	858	900	1095	1245	1453	374.23	405.295	336.422	820.535	992.954	980.736	K21405 sigma-54 dependent transcriptional regulator
MSMEG_2035	2.12535	1.47462e-12	9.29573	2.35976e-14	2194	1745	1654	1872	2334	2316	710.26	824.289	618.27	1402.78	1861.49	1563.24	K00274 monoamine oxidase [EC:1.4.3.4]
MSMEG_5606	2.53267	1.60996e-12	8.12155	2.6016e-14	773	552	581	787	1018	1155	250.242	260.749	217.179	589.736	811.909	779.594	K00426 cytochrome bd ubiquinol oxidase subunit II [EC:7.1.1.7]
MSMEG_3931	-6.99432	1.63943e-12	6.5611	2.67493e-14	7369	5606	6233	11	10	19	2385.55	2648.12	2329.91	8.243	7.976	12.824	[NiFe] hydrogenase, beta subunit, putative
MSMEG_0911	-7.34136	1.69205e-12	4.7137	2.78735e-14	2083	1333	1847	3	4	1	674.326	629.672	690.414	2.248	3.19	0.675	K01637 isocitrate lyase [EC:4.1.3.1]
MSMEG_2273	2.12204	1.71921e-12	7.95238	2.86781e-14	434	408	430	419	463	621	140.498	192.728	160.735	313.976	369.267	419.158	K04656 hydrogenase maturation protein HypF
MSMEG_2276	2.27089	1.71921e-12	7.8836	2.91912e-14	626	497	464	547	689	828	202.654	234.769	173.444	409.893	549.514	558.878	K04655 hydrogenase expression/formation protein HypE
MSMEG_5022	2.70244	1.71921e-12	4.9337	2.91304e-14	116	86	99	140	207	182	37.552	40.624	37.006	104.909	165.093	122.845	K07222 putative flavoprotein involved in K+ transport
MSMEG_5141	2.40959	1.71921e-12	4.58924	2.93997e-14	121	99	105	129	163	172	39.171	46.765	39.249	96.666	130.001	116.095	K02575 MFS transporter, NNP family, nitrate/nitrite transporter
MSMEG_6233	2.66359	1.75331e-12	6.219	3.02579e-14	200	143	129	209	308	282	64.746	67.549	48.221	156.614	245.646	190.342	conserved hypothetical protein
MSMEG_5732	-3.70394	1.79516e-12	6.75328	3.12617e-14	1614	1413	1694	26	33	37	522.497	667.462	633.222	19.483	26.319	24.974	monooxygenase
MSMEG_4339	2.36189	1.86244e-12	7.27635	3.27256e-14	474	347	416	682	569	463	153.447	163.913	155.502	511.055	453.808	312.513	tetratricopeptide repeat family protein
MSMEG_3255	2.37525	1.87683e-12	11.7592	3.3273e-14	11394	8060	8288	9932	14456	14259	3688.56	3807.32	3098.08	7442.52	11529.4	9624.44	DoxX subfamily protein, putative
MSMEG_1658	2.43084	1.88439e-12	9.48978	3.39983e-14	1576	1216	1241	1984	1959	1849	510.196	574.404	463.889	1486.7	1562.41	1248.03	K07058 membrane protein
MSMEG_3304	2.38956	1.88439e-12	9.57154	3.39601e-14	2546	1795	1879	2199	3035	3564	824.212	847.908	702.375	1647.81	2420.57	2405.61	K00135 succinate-semialdehyde dehydrogenase / glutarate-semialdehyde dehydrogenase [EC:1.2.1.16]
MSMEG_2715	4.83943	2.03689e-12	5.64965	3.70692e-14	72	68	57	271	550	841	23.308	32.121	21.307	203.073	438.654	567.653	conserved hypothetical protein
MSMEG_0900	2.54298	2.04398e-12	6.67609	3.75189e-14	364	209	242	451	443	355	117.837	98.726	90.46	337.956	353.316	239.616	K00138 aldehyde dehydrogenase [EC:1.2.1.-]
MSMEG_0698	2.06553	2.13551e-12	7.12028	3.9874e-14	252	214	298	249	272	334	81.58	101.088	111.393	186.587	216.934	225.441	isoniazid inductible protein IniC
MSMEG_1780	2.93618	2.13551e-12	7.09134	4.05395e-14	258	201	225	310	514	632	83.522	94.947	84.106	232.298	409.942	426.583	hypothetical protein
MSMEG_5573	2.86699	2.13551e-12	5.32067	4.02752e-14	67	48	42	96	94	114	21.69	22.674	15.7	71.937	74.97	76.947	K10228 polyol transport system permease protein
MSMEG_5952	2.62175	2.13551e-12	4.69856	4.04991e-14	91	88	79	156	147	123	29.459	41.569	29.53	116.898	117.24	83.022	conserved hypothetical protein, putative
MSMEG_6314	2.90299	2.13551e-12	5.01569	4.08741e-14	65	58	46	126	107	104	21.042	27.398	17.195	94.418	85.338	70.197	K01563 haloalkane dehalogenase [EC:3.8.1.5]
MSMEG_2058	2.32216	2.25829e-12	8.6806	4.35785e-14	5894	5656	6261	9263	7745	7002	1908.05	2671.74	2340.38	6941.2	6177.05	4726.16	K00335 NADH-quinone oxidoreductase subunit F [EC:7.1.1.2]
MSMEG_1204	1.92133	2.25853e-12	5.82055	4.39376e-14	205	154	178	166	177	200	66.364	72.745	66.537	124.392	141.167	134.995	K27070 meromycolic acid 3-oxoacyl-(acyl carrier protein) synthase II [EC:2.3.1.294]
MSMEG_4527	-3.79441	2.49992e-12	5.81284	4.90258e-14	548	490	521	8	12	9	177.403	231.462	194.751	5.995	9.571	6.075	K00392 sulfite reductase (ferredoxin) [EC:1.8.7.1]
MSMEG_0965	-3.07456	2.5553e-12	7.04364	5.13145e-14	1473	964	1247	38	26	55	476.852	455.367	466.132	28.475	20.736	37.124	porin
MSMEG_1846	3.03295	2.5553e-12	5.77562	5.11468e-14	124	71	80	163	227	207	40.142	33.538	29.904	122.144	181.045	139.719	polysulphide reductase, NrfD
MSMEG_2656	-2.54771	2.5553e-12	7.10385	5.06785e-14	1196	942	1162	39	60	52	387.179	444.974	434.359	29.225	47.853	35.099	K00962 polyribonucleotide nucleotidyltransferase [EC:2.7.7.8]
MSMEG_3936	-5.51289	2.56172e-12	4.61285	5.22473e-14	1745	1374	1571	9	9	8	564.906	649.039	587.244	6.744	7.178	5.4	universal stress protein family protein
MSMEG_5434	3.60019	2.56172e-12	5.32629	5.21287e-14	72	47	64	258	185	162	23.308	22.201	23.923	193.332	147.547	109.346	hypothetical protein
MSMEG_4268	-3.33862	2.68871e-12	6.39742	5.5259e-14	653	453	614	17	13	14	211.395	213.984	229.515	12.739	10.368	9.45	K02275 cytochrome c oxidase subunit II [EC:7.1.1.9]
MSMEG_1112	2.16207	2.76972e-12	9.48667	5.74605e-14	2879	2026	2238	2223	3225	3144	932.014	957.025	836.57	1665.8	2572.11	2122.12	K01681 aconitate hydratase [EC:4.2.1.3]
MSMEG_6237	-7.89273	2.76972e-12	2.28955	5.7793e-14	1026	767	994	1	0	1	332.145	362.309	371.56	0.749	0	0.675	conserved hypothetical protein
MSMEG_3564	2.5107	2.86063e-12	9.71237	6.03079e-14	1016	630	840	1451	1296	1025	328.908	297.594	313.994	1087.3	1033.63	691.848	K03594 bacterioferritin [EC:1.16.3.1]
MSMEG_5538	2.19996	2.86063e-12	8.50053	6.05875e-14	817	585	645	940	857	717	264.486	276.338	241.103	704.386	683.503	483.956	K00135 succinate-semialdehyde dehydrogenase / glutarate-semialdehyde dehydrogenase [EC:1.2.1.16]
MSMEG_6291	2.77249	2.88314e-12	6.46066	6.15167e-14	166	132	128	292	248	239	53.739	62.353	47.847	218.809	197.793	161.319	K00285 D-amino-acid dehydrogenase [EC:1.4.5.1]
MSMEG_3331	2.51662	2.9257e-12	7.87485	6.28838e-14	360	225	290	470	372	488	116.542	106.284	108.403	352.193	296.69	329.387	hypothetical protein
MSMEG_0968	2.91651	3.04025e-12	8.70003	6.61714e-14	984	729	762	1603	1691	1674	318.549	344.359	284.838	1201.2	1348.66	1129.9	cytochrome P450
MSMEG_2112	2.82617	3.04025e-12	9.85379	6.62997e-14	2308	1462	1816	3308	4031	3167	747.165	690.608	678.826	2478.84	3214.94	2137.64	secreted protein
MSMEG_6235	2.74257	3.33796e-12	6.09411	7.33158e-14	90	87	93	193	163	133	29.136	41.096	34.764	144.624	130.001	89.771	thiopurine S-methyltransferase (tpmt) superfamily protein
MSMEG_2080	-3.77317	3.44501e-12	7.09305	7.62075e-14	3555	2316	2812	38	54	81	1150.85	1094.01	1051.13	28.475	43.068	54.673	K00249 acyl-CoA dehydrogenase [EC:1.3.8.7]
MSMEG_0982	2.22274	3.84246e-12	4.44088	8.56024e-14	95	68	69	94	101	93	30.754	32.121	25.792	70.439	80.553	62.773	K07080 uncharacterized protein
MSMEG_5574	3.39354	3.88501e-12	6.23752	8.71597e-14	130	86	92	277	297	285	42.085	40.624	34.39	207.569	236.873	192.367	K10227 polyol transport system substrate-binding protein
MSMEG_5875	2.24214	4.10985e-12	6.19417	9.28487e-14	160	120	106	151	166	166	51.797	56.685	39.623	113.151	132.394	112.046	hypothetical protein
MSMEG_2115	2.43201	4.1142e-12	9.28538	9.42381e-14	1609	1014	1228	1630	2049	1821	520.879	478.985	459.03	1221.44	1634.19	1229.13	conserved hypothetical protein
MSMEG_6239	-4.53584	4.1142e-12	4.79877	9.36666e-14	1274	1010	1199	17	16	8	412.43	477.096	448.189	12.739	12.761	5.4	1,3-propanediol dehydrogenase
MSMEG_4728	-6.97238	4.54249e-12	3.66999	1.04761e-13	452	260	325	1	0	0	146.325	122.817	121.486	0.749	0	0	K23156 mycolipenoyl-CoA---2-(long-chain-fatty acyl)-trehalose mycolipenoyltransferase
MSMEG_3243	2.37757	4.864e-12	5.24665	1.12939e-13	91	85	120	139	125	143	29.459	40.152	44.856	104.159	99.694	96.521	pseudogene
MSMEG_6812	2.56356	4.99232e-12	6.7741	1.16702e-13	320	246	293	511	432	417	103.593	116.203	109.524	382.916	344.543	281.464	pseudogene
MSMEG_0362	2.53122	5.73275e-12	5.64121	1.37608e-13	83	54	77	130	112	91	26.869	25.508	28.783	97.415	89.326	61.423	K07045 uncharacterized protein
MSMEG_0880	-3.75887	5.73275e-12	7.02325	1.36286e-13	3104	2027	2137	20	61	79	1004.85	957.498	798.816	14.987	48.651	53.323	K04077 chaperonin GroEL [EC:5.6.1.7]
MSMEG_3593	2.17763	5.73275e-12	7.49701	1.35946e-13	636	548	628	722	694	778	205.891	258.86	234.748	541.029	553.502	525.129	conserved hypothetical protein
MSMEG_5401	2.64184	5.73275e-12	9.35887	1.37109e-13	1633	1193	1275	2023	2223	2587	528.648	563.54	476.598	1515.93	1772.96	1746.16	conserved hypothetical protein
MSMEG_1794	2.77466	6.23678e-12	10.0638	1.51131e-13	2556	1873	1973	3824	4108	3715	827.449	884.753	737.513	2865.5	3276.35	2507.53	dehydrogenase
MSMEG_2973	2.25754	6.23678e-12	6.62683	1.51663e-13	146	131	126	198	166	154	47.264	61.881	47.099	148.371	132.394	103.946	K03768 peptidyl-prolyl cis-trans isomerase B (cyclophilin B) [EC:5.2.1.8]
MSMEG_0066	-3.43406	6.28569e-12	6.34485	1.53839e-13	1372	849	1050	15	30	38	444.155	401.044	392.493	11.24	23.927	25.649	K14956 ESAT-6 family protein
MSMEG_2052	2.77963	6.82874e-12	6.30108	1.68201e-13	1064	834	906	1899	1988	1331	344.447	393.958	338.665	1423.01	1585.54	898.39	K00341 NADH-quinone oxidoreductase subunit L [EC:7.1.1.2]
MSMEG_5951	2.63676	6.9906e-12	4.76319	1.73285e-13	46	47	51	76	92	72	14.891	22.201	19.064	56.95	73.375	48.598	glycosyl transferase, group 1, putative
MSMEG_3934	-3.87515	7.09883e-12	8.36759	1.77081e-13	12783	8844	9630	126	210	247	4138.22	4177.66	3599.72	94.418	167.486	166.718	K01007 pyruvate, water dikinase [EC:2.7.9.2]
MSMEG_1496	1.78945	7.28947e-12	8.46479	1.84124e-13	1065	1008	1034	1007	835	1047	344.771	476.151	386.512	754.593	665.957	706.697	K00020 3-hydroxyisobutyrate dehydrogenase [EC:1.1.1.31]
MSMEG_5131	2.20226	7.28947e-12	5.02383	1.83883e-13	379	331	303	319	426	523	122.693	156.355	113.262	239.042	339.758	353.011	hypothetical protein
MSMEG_5255	2.29316	7.37352e-12	5.50904	1.8856e-13	84	58	69	98	88	90	27.193	27.398	25.792	73.436	70.185	60.748	conserved hypothetical protein
MSMEG_6428	2.41663	7.37352e-12	7.31977	1.88183e-13	563	522	594	1084	704	671	182.259	246.578	222.039	812.292	561.477	452.907	conserved hypothetical protein
MSMEG_5789	-5.62987	7.89905e-12	5.32543	2.03239e-13	726	465	642	1	6	3	235.027	219.653	239.981	0.749	4.785	2.025	K01011 thiosulfate/3-mercaptopyruvate sulfurtransferase [EC:2.8.1.1 2.8.1.2]
MSMEG_3942	-2.56137	8.15646e-12	9.47777	2.11141e-13	10696	8014	9686	362	483	443	3462.6	3785.59	3620.65	271.264	385.218	299.013	K07028 uncharacterized protein
MSMEG_2917	2.5896	8.28687e-12	6.17976	2.15817e-13	164	160	158	314	241	229	53.091	75.58	59.061	235.295	192.21	154.569	hypothetical protein
MSMEG_5486	1.94802	8.32116e-12	9.21695	2.18016e-13	1531	1086	1031	1094	1320	1314	495.628	512.996	385.391	819.786	1052.77	886.915	K08372 putative serine protease PepD [EC:3.4.21.-]
MSMEG_6739	3.08399	8.62768e-12	4.26321	2.274e-13	26	21	19	51	44	56	8.417	9.92	7.102	38.217	35.092	37.799	hypothetical protein
MSMEG_2958	2.22145	9.08725e-12	9.85823	2.42365e-13	3440	2347	2379	2629	3948	3617	1113.62	1108.66	889.277	1970.03	3148.74	2441.38	conserved hypothetical protein
MSMEG_4431	2.08908	9.08725e-12	6.80965	2.42137e-13	235	189	198	219	235	253	76.076	89.278	74.013	164.107	187.425	170.768	putative regulatory protein
MSMEG_1360	2.37781	9.22918e-12	7.87939	2.48108e-13	564	444	452	642	734	650	182.583	209.733	168.959	481.081	585.404	438.733	endonuclease/exonuclease/phosphatase
MSMEG_1764	3.70448	9.22918e-12	6.25794	2.49046e-13	29	18	32	122	96	66	9.388	8.503	11.962	91.42	76.565	44.548	K03918 L-lysine 6-transaminase [EC:2.6.1.36]
MSMEG_5906	2.54793	9.65363e-12	4.77497	2.62014e-13	55	43	48	84	79	67	17.805	20.312	17.943	62.945	63.007	45.223	K22818 3-oxocholest-4-en-26-oyl-CoA dehydrogenase alpha subunit [EC:1.3.99.-]
MSMEG_0699	2.28017	9.90901e-12	8.28481	2.71382e-13	880	751	775	1357	1051	794	284.881	354.751	289.697	1016.86	838.228	535.929	conserved hypothetical proline rich protein
MSMEG_6236	-7.52272	9.90901e-12	2.31165	2.72055e-13	691	495	588	0	0	2	223.696	233.824	219.796	0	0	1.35	two-component system, regulatory protein
MSMEG_1801	3.17859	9.9395e-12	6.5918	2.74451e-13	215	152	160	461	383	427	69.602	71.801	59.808	345.449	305.463	288.214	hypothetical protein
MSMEG_6211	2.42141	1.01738e-11	6.48679	2.82518e-13	235	178	172	307	281	248	76.076	84.082	64.294	230.05	224.112	167.393	hypothetical protein
MSMEG_0166	2.60641	1.03494e-11	6.66139	2.89017e-13	193	141	177	247	284	300	62.48	66.604	66.163	185.089	226.505	202.492	GntR-family protein transcriptional regulator
MSMEG_1787	2.17352	1.0562e-11	9.08654	2.96611e-13	2209	1738	1916	2047	2435	2607	715.116	820.982	716.206	1533.91	1942.04	1759.65	RsbW protein
MSMEG_3076	2.00419	1.06927e-11	6.6151	3.01958e-13	267	236	225	260	228	296	86.435	111.48	84.106	194.83	181.842	199.792	K00681 gamma-glutamyltranspeptidase / glutathione hydrolase [EC:2.3.2.2 3.4.19.13]
MSMEG_4727	-5.34489	1.12968e-11	6.52029	3.20791e-13	2519	1735	1964	3	21	30	815.471	819.565	734.149	2.248	16.749	20.249	K12433 polyketide synthase 5
MSMEG_0419	1.78632	1.16818e-11	5.02561	3.33557e-13	246	214	237	206	235	203	79.637	101.088	88.591	154.366	187.425	137.02	integral membrane protein
MSMEG_0744	3.01912	1.17849e-11	3.17954	3.3835e-13	34	25	34	70	72	61	11.007	11.809	12.709	52.454	57.424	41.173	K03519 aerobic carbon-monoxide dehydrogenase medium subunit [EC:1.2.5.3]
MSMEG_0423	1.87501	1.23676e-11	6.33231	3.5702e-13	247	213	197	189	247	210	79.961	100.615	73.639	141.627	196.996	141.744	conserved hypothetical protein
MSMEG_1790	2.39247	1.24545e-11	10.4809	3.61481e-13	3858	2403	3210	4138	5489	3663	1248.94	1135.11	1199.91	3100.8	4377.77	2472.43	conserved hypothetical protein
MSMEG_2056	2.58484	1.2611e-11	4.91535	3.68001e-13	403	269	335	633	596	403	130.462	127.068	125.224	474.337	475.342	272.014	K00337 NADH-quinone oxidoreductase subunit H [EC:7.1.1.2]
MSMEG_1621	-2.43983	1.3177e-11	5.85031	3.86774e-13	1835	1189	1314	50	71	94	594.041	561.65	491.177	37.467	56.626	63.447	K01239 purine nucleosidase [EC:3.2.2.1]
MSMEG_6751	2.48742	1.3177e-11	5.76228	3.88654e-13	99	67	72	109	117	129	32.049	31.649	26.914	81.679	93.314	87.072	hypothetical protein
MSMEG_2061	2.3264	1.32265e-11	4.68013	3.93904e-13	230	214	246	382	304	253	74.457	101.088	91.955	286.251	242.456	170.768	K00332 NADH-quinone oxidoreductase subunit C [EC:7.1.1.2]
MSMEG_3281	2.29516	1.32265e-11	5.60645	3.96338e-13	98	66	87	116	115	98	31.725	31.177	32.521	86.924	91.719	66.147	K11072 spermidine/putrescine transport system ATP-binding protein [EC:7.6.2.11]
MSMEG_3706	1.95834	1.32265e-11	6.07991	3.9517e-13	367	268	302	299	348	323	118.808	126.596	112.888	224.055	277.548	218.016	K01637 isocitrate lyase [EC:4.1.3.1]
MSMEG_1878	2.26683	1.32294e-11	6.4736	3.985e-13	234	180	213	280	311	222	75.752	85.027	79.62	209.817	248.039	149.844	S30AE family protein
MSMEG_5402	2.82354	1.34153e-11	9.33932	4.06206e-13	1323	1054	1144	2170	2203	2280	428.292	497.88	427.63	1626.08	1757.01	1538.94	dehydrogenase DhgA
MSMEG_2275	2.05326	1.56327e-11	7.0498	4.75798e-13	384	306	287	298	365	426	124.312	144.546	107.281	223.305	291.107	287.539	K04654 hydrogenase expression/formation protein HypD
MSMEG_2050	2.41966	1.62602e-11	5.99912	4.9745e-13	687	498	521	914	876	659	222.401	235.241	194.751	684.903	698.657	444.807	K00343 NADH-quinone oxidoreductase subunit N [EC:7.1.1.2]
MSMEG_1782	2.40098	1.69785e-11	10.6841	5.22086e-13	4507	3052	3574	4973	5355	5245	1459.04	1441.68	1335.97	3726.5	4270.9	3540.24	oxidoreductase, short chain dehydrogenase/reductase family protein
MSMEG_1561	2.16849	1.72724e-11	5.90099	5.33835e-13	144	113	113	187	141	123	46.617	53.378	42.24	140.128	112.455	83.022	LysR-family protein trancsriptional regulator
MSMEG_5543	2.441	1.85198e-11	11.6615	5.75294e-13	9499	6816	7650	10801	11950	11837	3075.09	3219.69	2859.59	8093.7	9530.76	7989.66	hypothetical protein
MSMEG_5267	2.21967	1.86861e-11	7.73963	5.86322e-13	440	282	314	517	457	323	142.44	133.209	117.374	387.412	364.482	218.016	K00252 glutaryl-CoA dehydrogenase [EC:1.3.8.6]
MSMEG_6788	2.07526	1.86861e-11	6.66122	5.84117e-13	249	182	211	270	262	196	80.608	85.972	78.872	202.324	208.959	132.295	K20901 L-erythrulose 1-kinase [EC:2.7.1.209]
MSMEG_1711	2.78744	2.00153e-11	7.92758	6.31171e-13	532	440	561	892	684	1362	172.223	207.844	209.703	668.418	545.526	919.314	K10820 galactofuranose transport system ATP-binding protein [EC:7.5.2.9]
MSMEG_6018	2.22542	2.14367e-11	5.38496	6.79356e-13	242	169	191	201	276	278	78.342	79.831	71.396	150.619	220.125	187.643	K10544 D-xylose transport system permease protein
MSMEG_4731	-7.01527	2.17896e-11	2.95571	6.93958e-13	312	197	226	0	0	0	101.003	93.057	84.479	0	0	0	acyl-CoA synthase
MSMEG_0964	2.62966	2.2774e-11	7.43792	7.28881e-13	286	282	307	359	486	644	92.586	133.209	114.757	269.016	387.611	434.683	pyridoxamine 5'-phosphate oxidase family protein
MSMEG_3937	-5.68972	2.45321e-11	3.65186	7.89e-13	1100	751	847	1	8	7	356.101	354.751	316.611	0.749	6.38	4.725	conserved hypothetical protein
MSMEG_0536	1.89675	2.49441e-11	6.38996	8.06165e-13	186	144	165	165	153	174	60.213	68.022	61.677	123.642	122.026	117.445	K05520 deglycase [EC:3.5.1.124]
MSMEG_1365	-4.03558	2.58679e-11	6.37298	8.40078e-13	696	487	584	6	10	12	225.315	230.045	218.301	4.496	7.976	8.1	K02935 large subunit ribosomal protein L7/L12
MSMEG_4756	-2.98005	2.76009e-11	6.96748	9.00687e-13	681	531	605	19	20	21	220.459	250.829	226.151	14.238	15.951	14.174	K00997 holo-[acyl-carrier protein] synthase [EC:2.7.8.7]
MSMEG_2122	2.44216	2.98262e-11	4.8852	9.77985e-13	63	50	48	70	75	89	20.395	23.619	17.943	52.454	59.816	60.073	K05879 phosphoenolpyruvate---glycerone phosphotransferase subunit DhaL [EC:2.7.1.121]
MSMEG_4916	1.98014	3.03679e-11	9.86696	1.00051e-12	2779	2029	2228	2319	2655	2415	899.641	958.443	832.832	1737.74	2117.5	1630.06	K16147 starch synthase (maltosyl-transferring) [EC:2.4.99.16]
MSMEG_0375	2.15718	3.04527e-11	8.2225	1.00808e-12	1059	781	897	892	1133	1254	342.828	368.922	335.301	668.418	903.628	846.417	phospholipase D family protein
MSMEG_0064	-2.98207	3.10881e-11	6.44558	1.03399e-12	1616	1080	1163	25	48	62	523.145	510.162	434.733	18.734	38.283	41.848	ppe family protein
MSMEG_1393	-3.57234	3.22953e-11	2.62243	1.07921e-12	717	477	700	19	11	12	232.113	225.321	261.662	14.238	8.773	8.1	conserved hypothetical protein
MSMEG_2705	5.34405	3.22957e-11	4.68218	1.08429e-12	38	46	30	185	485	740	12.302	21.729	11.214	138.629	386.813	499.48	K04655 hydrogenase expression/formation protein HypE
MSMEG_5733	-1.8907	3.50633e-11	10.6233	1.18271e-12	20786	16599	16966	1123	1383	1421	6729.02	7840.9	6341.94	841.517	1103.02	959.137	universal stress protein family protein
MSMEG_3002	2.88743	3.51004e-11	4.31157	1.18947e-12	34	36	34	71	57	79	11.007	17.005	12.709	53.204	45.461	53.323	K03929 para-nitrobenzyl esterase [EC:3.1.1.-]
MSMEG_2690	2.24946	3.52956e-11	8.21829	1.20162e-12	323	251	279	466	349	289	104.564	118.565	104.291	349.196	278.346	195.067	K03466 DNA segregation ATPase FtsK/SpoIIIE, S-DNA-T family
MSMEG_2053	2.58019	3.60295e-11	3.56307	1.23226e-12	111	89	123	202	188	133	35.934	42.041	45.978	151.368	149.94	89.771	K00340 NADH-quinone oxidoreductase subunit K [EC:7.1.1.2]
MSMEG_3952	-1.88196	3.73909e-11	8.57111	1.28469e-12	3565	2523	3383	206	224	252	1154.09	1191.79	1264.58	154.366	178.652	170.093	conserved hypothetical protein
MSMEG_1789	2.25794	3.7806e-11	8.77073	1.31106e-12	1309	912	1059	1394	1698	1129	423.76	430.803	395.857	1044.59	1354.24	762.045	conserved hypothetical protein
MSMEG_4205	1.9501	3.7806e-11	5.45082	1.31674e-12	203	168	184	141	192	255	65.717	79.358	68.78	105.658	153.13	172.118	putative transcriptional regulator
MSMEG_6616	2.5949	3.7806e-11	10.6302	1.30878e-12	5516	3877	4081	6949	8070	6615	1785.68	1831.39	1525.49	5207.21	6436.25	4464.95	S-(hydroxymethyl)glutathione dehydrogenase
MSMEG_5120	3.04026	3.82673e-11	5.90778	1.33881e-12	37	40	44	89	77	100	11.978	18.895	16.447	66.692	61.412	67.497	conserved hypothetical protein
MSMEG_2945	1.83718	4.08918e-11	7.43818	1.43705e-12	386	233	256	290	282	249	124.959	110.063	95.693	217.311	224.91	168.068	K03551 holliday junction DNA helicase RuvB [EC:5.6.2.4]
MSMEG_6238	-8.08517	4.12487e-11	2.14731	1.45607e-12	571	447	508	0	0	0	184.849	211.15	189.892	0	0	0	putative two-component system sensor kinase
MSMEG_3940	-7.20295	4.2113e-11	4.15504	1.49318e-12	1488	1085	1339	3	1	2	481.708	512.524	500.522	2.248	0.798	1.35	universal stress protein family protein
MSMEG_4554	1.95699	4.2883e-11	6.43227	1.52721e-12	281	257	288	312	231	324	90.968	121.4	107.655	233.796	184.235	218.691	probable serine/threonine-protein kinase PknH, putative
MSMEG_4575	4.12702	4.31825e-11	4.33354	1.54465e-12	20	19	23	80	112	103	6.475	8.975	8.597	59.948	89.326	69.522	hypothetical protein
MSMEG_0358	1.72938	4.57397e-11	7.40922	1.65765e-12	663	463	544	561	485	432	214.632	218.708	203.349	420.384	386.813	291.588	K00526 ribonucleoside-diphosphate reductase beta chain [EC:1.17.4.1]
MSMEG_3141	2.0781	4.57397e-11	10.834	1.65694e-12	9245	6540	7044	8257	8930	8378	2992.87	3089.31	2633.07	6187.36	7122.15	5654.93	conserved domain protein
MSMEG_0826	-3.70987	4.58e-11	5.53435	1.67928e-12	340	305	342	6	5	8	110.068	144.073	127.841	4.496	3.988	5.4	K03147 phosphomethylpyrimidine synthase [EC:4.1.99.17]
MSMEG_1179	3.84963	4.58e-11	4.59516	1.67323e-12	31	23	29	146	124	70	10.036	10.865	10.84	109.405	98.897	47.248	K01712 urocanate hydratase [EC:4.2.1.49]
MSMEG_1909	3.61999	4.58e-11	3.89874	1.68139e-12	32	20	22	57	96	97	10.359	9.447	8.224	42.713	76.565	65.472	putative HTH-type transcriptional regulator YnfL
MSMEG_3939	-4.4814	4.59021e-11	6.64548	1.69234e-12	3113	2387	2729	21	26	59	1007.77	1127.55	1020.11	15.736	20.736	39.823	universal stress protein family protein
MSMEG_0883	1.82366	4.63342e-11	6.15479	1.72281e-12	198	155	152	135	176	167	64.098	73.218	56.818	101.162	140.369	112.721	amidohydrolase family protein
MSMEG_6083	1.79687	4.63342e-11	9.68281	1.71752e-12	2121	1789	1662	1922	1795	1477	686.628	845.073	621.26	1440.24	1431.61	996.936	K03575 A/G-specific adenine glycosylase [EC:3.2.2.31]
MSMEG_4290	-3.54745	4.65559e-11	6.34485	1.73836e-12	1616	968	1290	17	38	35	523.145	457.256	482.205	12.739	30.307	23.624	K01915 glutamine synthetase [EC:6.3.1.2]
MSMEG_2718	5.42038	4.66683e-11	4.21553	1.74988e-12	31	23	34	172	366	607	10.036	10.865	12.709	128.888	291.904	409.709	iron-sulfur cluster-binding protein, Rieske family protein, putative
MSMEG_5522	2.58704	4.71465e-11	5.4816	1.77521e-12	45	36	44	79	64	60	14.568	17.005	16.447	59.198	51.043	40.498	transcriptional Regulator, TetR family protein
MSMEG_1770	1.60555	4.78434e-11	13.672	1.80895e-12	26223	18669	19637	15678	16838	19766	8489.12	8818.71	7340.36	11748.3	13429.2	13341.5	conserved hypothetical protein
MSMEG_2081	-3.28278	4.84636e-11	6.67074	1.84001e-12	1932	1292	1486	40	51	37	625.443	610.305	555.471	29.974	40.675	24.974	putative acyl-CoA dehydrogenase
MSMEG_4338	2.56409	4.92648e-11	4.89826	1.87815e-12	65	38	42	67	67	95	21.042	17.95	15.7	50.206	53.436	64.122	possible transcriptional regulatory protein
MSMEG_2914	1.9293	5.0871e-11	6.94317	1.94737e-12	301	206	264	256	270	253	97.442	97.309	98.684	191.833	215.339	170.768	K00098 L-idonate 5-dehydrogenase [EC:1.1.1.264]
MSMEG_0819	-6.7748	5.13219e-11	2.42139	1.97268e-12	836	554	659	0	2	3	270.637	261.694	246.336	0	1.595	2.025	K06016 beta-ureidopropionase / N-carbamoyl-L-amino-acid hydrolase [EC:3.5.1.6 3.5.1.87]
MSMEG_0696	2.39787	5.21385e-11	7.8545	2.03317e-12	777	535	508	682	951	919	251.537	252.719	189.892	511.055	758.473	620.3	alanine-rich protein
MSMEG_3121	1.71085	5.21385e-11	11.1629	2.04497e-12	14652	13133	13884	13271	10889	12486	4743.27	6203.66	5189.88	9944.59	8684.56	8427.72	DNA-binding protein
MSMEG_3560	2.64014	5.21385e-11	6.51549	2.03739e-12	199	148	191	308	326	263	64.422	69.911	71.396	230.799	260.002	177.518	conserved hypothetical protein
MSMEG_6903	-2.18436	5.21385e-11	6.69559	2.03527e-12	2183	1536	1762	71	117	142	706.699	725.563	658.64	53.204	93.314	95.846	transcriptional regulator, PadR family protein
MSMEG_3948	-2.6024	5.39769e-11	7.05997	2.12554e-12	2127	1543	1940	55	76	126	688.57	728.87	725.177	41.214	60.614	85.047	K00635 diacylglycerol O-acyltransferase / wax synthase [EC:2.3.1.20 2.3.1.75]
MSMEG_2449	-1.98059	5.54036e-11	5.29447	2.19042e-12	3864	2479	3184	173	259	212	1250.89	1171.01	1190.19	129.637	206.566	143.094	K00140 malonate-semialdehyde dehydrogenase (acetylating) / methylmalonate-semialdehyde dehydrogenase
MSMEG_1442	-4.77673	5.61169e-11	4.43934	2.22742e-12	243	173	198	1	3	1	78.666	81.72	74.013	0.749	2.393	0.675	K02982 small subunit ribosomal protein S3
MSMEG_6321	1.7361	5.88522e-11	6.79012	2.34522e-12	271	210	231	180	196	264	87.73	99.198	86.348	134.882	156.32	178.193	glycerol dehydratase large subunit
MSMEG_5271	1.95687	6.10321e-11	7.52124	2.44167e-12	647	463	489	559	557	531	209.452	218.708	182.79	418.885	444.237	358.411	esterase
MSMEG_1783	2.34267	6.11614e-11	7.90281	2.45644e-12	511	352	385	600	536	543	165.425	166.275	143.914	449.608	427.488	366.511	hypothetical protein
MSMEG_6662	1.78412	6.49255e-11	6.37405	2.6178e-12	105	84	93	84	89	86	33.991	39.679	34.764	62.945	70.982	58.048	short chain dehydrogenase
MSMEG_3524	2.9279	6.58635e-11	4.05292	2.66595e-12	49	22	21	64	60	55	15.863	10.392	7.85	47.958	47.853	37.124	K15981 cholest-4-en-3-one 26-monooxygenase [EC:1.14.15.29]
MSMEG_1966	2.50871	6.62354e-11	4.48895	2.6914e-12	65	46	44	79	84	72	21.042	21.729	16.447	59.198	66.994	48.598	hypothetical protein
MSMEG_6020	2.00553	7.07443e-11	5.35829	2.88571e-12	233	176	216	180	243	252	75.429	83.137	80.741	134.882	193.805	170.093	K10543 D-xylose transport system substrate-binding protein
MSMEG_4361	2.45178	7.43308e-11	4.77753	3.05533e-12	59	38	48	75	63	74	19.1	17.95	17.943	56.201	50.246	49.948	conserved hypothetical protein
MSMEG_3330	2.77207	7.93246e-11	4.25265	3.27304e-12	41	27	32	58	57	68	13.273	12.754	11.962	43.462	45.461	45.898	conserved domain protein
MSMEG_1881	-1.68917	8.08618e-11	7.64873	3.34915e-12	1195	912	1062	79	93	89	386.855	430.803	396.978	59.198	74.172	60.073	K03070 preprotein translocase subunit SecA [EC:7.4.2.8]
MSMEG_4477	2.61767	8.24322e-11	5.58511	3.42713e-12	140	71	74	126	181	149	45.322	33.538	27.661	94.418	144.357	100.571	hydrolase, alpha/beta hydrolase fold family protein
MSMEG_2657	-3.70812	8.62398e-11	4.91095	3.59896e-12	286	228	282	6	5	4	92.586	107.701	105.412	4.496	3.988	2.7	peptidase, M16 family protein
MSMEG_3075	1.85939	8.90779e-11	6.844	3.73138e-12	278	231	212	190	229	286	89.996	109.118	79.246	142.376	182.64	193.042	acetyltransferase, GNAT family protein
MSMEG_4951	-2.55448	9.05911e-11	7.21401	3.80898e-12	728	522	728	41	26	24	235.674	246.578	272.128	30.723	20.736	16.199	K02909 large subunit ribosomal protein L31
MSMEG_0265	2.48557	9.1772e-11	7.68393	3.87303e-12	634	447	475	747	816	749	205.244	211.15	177.556	559.762	650.803	505.555	K21929 uracil-DNA glycosylase [EC:3.2.2.27]
MSMEG_3929	-6.38439	9.61554e-11	1.86684	4.0731e-12	273	174	236	0	1	0	88.378	82.193	88.217	0	0.798	0	[NiFe] hydrogenase, delta subunit, putative
MSMEG_3946	-2.07238	9.6399e-11	8.91875	4.09855e-12	6692	5421	6184	330	355	493	2166.39	2560.73	2311.6	247.285	283.131	332.762	probable conserved transmembrane protein
MSMEG_3444	1.75049	9.93604e-11	7.37859	4.24004e-12	481	372	432	297	391	487	155.713	175.722	161.483	222.556	311.843	328.712	choline dehydrogenase
MSMEG_5967	1.78956	1.12739e-10	6.76127	4.82866e-12	315	222	233	243	255	210	101.974	104.867	87.096	182.091	203.376	141.744	glucose-methanol-choline oxidoreductase
MSMEG_5136	-1.81428	1.15641e-10	10.1535	4.98922e-12	13068	9863	10667	734	885	935	4230.48	4659	3987.35	550.021	705.834	631.1	helix-turn-helix motif
MSMEG_1781	2.19257	1.18846e-10	7.83887	5.16478e-12	384	312	408	347	407	635	124.312	147.38	152.512	260.023	324.604	428.608	hypothetical protein
MSMEG_0689	-5.10129	1.21403e-10	3.57181	5.29494e-12	479	383	379	6	3	1	155.066	180.918	141.671	4.496	2.393	0.675	hypothetical protein
MSMEG_3594	1.62765	1.23564e-10	8.02196	5.40859e-12	726	627	639	582	500	567	235.027	296.177	238.86	436.12	398.777	382.71	K00529 3-phenylpropionate/trans-cinnamate dioxygenase ferredoxin reductase component [EC:1.18.1.3]
MSMEG_2123	2.14667	1.28255e-10	5.63349	5.63558e-12	110	111	96	97	135	146	35.61	52.433	35.885	72.687	107.67	98.546	K05878 phosphoenolpyruvate---glycerone phosphotransferase subunit DhaK [EC:2.7.1.121]
MSMEG_4279	1.72741	1.28255e-10	5.21078	5.65416e-12	140	114	114	111	111	103	45.322	53.85	42.614	83.178	88.528	69.522	adenylate and Guanylate cyclase catalytic domain protein
MSMEG_3637	1.85449	1.29532e-10	7.03218	5.7308e-12	315	291	238	302	270	243	101.974	137.46	88.965	226.303	215.339	164.019	K03699 magnesium and cobalt exporter, CNNM family
MSMEG_3531	-3.35812	1.29564e-10	5.3244	5.75253e-12	286	209	241	5	5	8	92.586	98.726	90.086	3.747	3.988	5.4	conserved hypothetical protein
MSMEG_6078	-3.8285	1.33964e-10	5.52964	5.96892e-12	285	207	267	3	5	5	92.263	97.781	99.805	2.248	3.988	3.375	LpqE protein
MSMEG_0249	2.22996	1.37606e-10	6.1544	6.15276e-12	108	59	74	98	96	103	34.963	27.87	27.661	73.436	76.565	69.522	K20469 putative heme transporter
MSMEG_5243	-1.60671	1.37937e-10	9.02878	6.18919e-12	5069	3665	4140	343	360	423	1640.98	1731.24	1547.54	257.026	287.119	285.514	K07005 uncharacterized protein
MSMEG_3903	-2.83434	1.4111e-10	6.77407	6.35373e-12	653	472	586	17	20	26	211.395	222.96	219.048	12.739	15.951	17.549	Low molecular weight antigen MTB12
MSMEG_1766	2.01187	1.41147e-10	8.37268	6.37754e-12	1286	941	993	967	1211	1296	416.314	444.502	371.186	724.619	965.837	874.765	conserved hypothetical protein
MSMEG_3625	-3.73609	1.41357e-10	5.23045	6.40917e-12	299	234	228	6	4	4	96.795	110.535	85.227	4.496	3.19	2.7	K01428 urease subunit alpha [EC:3.5.1.5]
MSMEG_4182	1.70023	1.42311e-10	6.39793	6.47475e-12	426	319	420	340	309	359	137.908	150.687	156.997	254.778	246.444	242.315	arabinose-proton symporter
MSMEG_2055	2.68613	1.48187e-10	3.93954	6.76537e-12	116	71	78	179	189	101	37.552	33.538	29.157	134.133	150.738	68.172	K00338 NADH-quinone oxidoreductase subunit I [EC:7.1.1.2]
MSMEG_6458	-4.63021	1.50602e-10	3.74115	6.89925e-12	387	303	299	1	6	4	125.283	143.129	111.767	0.749	4.785	2.7	K00266 glutamate synthase (NADPH) small chain [EC:1.4.1.13]
MSMEG_2054	2.63335	1.54658e-10	4.78379	7.10934e-12	308	204	245	500	467	306	99.708	96.364	91.582	374.674	372.457	206.542	K00339 NADH-quinone oxidoreductase subunit J [EC:7.1.1.2]
MSMEG_3559	1.95968	1.58615e-10	5.43418	7.31611e-12	160	147	162	142	169	178	51.797	69.439	60.556	106.407	134.786	120.145	short chain dehydrogenase
MSMEG_6019	1.84276	1.59018e-10	5.27717	7.35962e-12	207	168	192	155	166	229	67.012	79.358	71.77	116.149	132.394	154.569	K10545 D-xylose transport system ATP-binding protein [EC:7.5.2.10]
MSMEG_6459	-2.62228	1.70584e-10	5.65008	7.92169e-12	466	327	365	17	13	19	150.857	154.466	136.438	12.739	10.368	12.824	K00265 glutamate synthase (NADPH) large chain [EC:1.4.1.13]
MSMEG_5230	2.29388	1.71349e-10	4.81943	7.98408e-12	77	38	48	69	79	62	24.927	17.95	17.943	51.705	63.007	41.848	conserved hypothetical protein
MSMEG_0987	1.73219	1.73263e-10	8.28078	8.10048e-12	1418	918	969	1096	1010	808	459.047	433.637	362.215	821.284	805.529	545.378	hypothetical protein
MSMEG_3023	2.27483	1.79188e-10	6.04986	8.40559e-12	156	89	133	131	196	160	50.502	42.041	49.716	98.164	156.32	107.996	pseudogene
MSMEG_2597	2.46257	1.80523e-10	6.07023	8.52487e-12	71	65	64	78	99	121	22.985	30.704	23.923	58.449	78.958	81.672	aldehyde dehydrogenase
MSMEG_3365	1.98046	1.80523e-10	4.8418	8.49705e-12	75	62	62	76	64	70	24.28	29.287	23.176	56.95	51.043	47.248	transcriptional regulator, AraC family protein
MSMEG_2060	2.44502	1.85805e-10	6.43275	8.83257e-12	873	695	878	1635	1237	822	282.615	328.298	328.199	1225.18	986.573	554.828	K00333 NADH-quinone oxidoreductase subunit D [EC:7.1.1.2]
MSMEG_4646	-3.09143	1.85832e-10	6.65567	8.86303e-12	1043	743	948	30	26	28	337.649	350.972	354.365	22.48	20.736	18.899	K00174 2-oxoglutarate/2-oxoacid ferredoxin oxidoreductase subunit alpha [EC:1.2.7.3 1.2.7.11]
MSMEG_2710	4.91261	2.02834e-10	3.75434	9.70575e-12	17	24	22	88	175	300	5.503	11.337	8.224	65.943	139.572	202.492	hypothetical protein
MSMEG_2884	3.21144	2.13982e-10	4.08682	1.02727e-11	32	16	26	78	59	49	10.359	7.558	9.719	58.449	47.056	33.074	cyclohexanone monooxygenase
MSMEG_0521	2.5661	2.1543e-10	6.98913	1.03936e-11	365	257	305	565	479	425	118.161	121.4	114.01	423.381	382.028	286.864	pseudogene
MSMEG_0743	1.63287	2.1543e-10	6.17136	1.04155e-11	213	167	164	145	158	146	68.954	78.886	61.304	108.655	126.013	98.546	K07402 xanthine dehydrogenase accessory factor
MSMEG_5661	1.77343	2.1543e-10	7.68942	1.04437e-11	550	449	393	375	434	458	178.051	212.095	146.904	281.005	346.138	309.138	ABC transporter ATP-binding protein
MSMEG_2753	2.68443	2.16442e-10	7.5602	1.05267e-11	332	218	249	458	588	345	107.478	102.977	93.077	343.201	468.961	232.866	conserved hypothetical protein
MSMEG_1793	2.00444	2.20451e-10	6.45486	1.07562e-11	176	151	159	171	188	163	56.976	71.328	59.435	128.138	149.94	110.021	membrane protein
MSMEG_2037	2.23615	2.21507e-10	8.37818	1.08425e-11	1163	902	888	1087	1306	1321	376.496	426.079	331.937	814.54	1041.6	891.64	conserved hypothetical protein
MSMEG_2954	1.79149	2.25573e-10	5.8569	1.11123e-11	152	91	106	106	106	106	49.207	42.986	39.623	79.431	84.541	71.547	K02529 LacI family transcriptional regulator, galactose operon repressor
MSMEG_4235	1.76618	2.25573e-10	7.63142	1.11057e-11	296	293	366	329	271	269	95.824	138.405	136.812	246.535	216.137	181.568	K03438 16S rRNA (cytosine1402-N4)-methyltransferase [EC:2.1.1.199]
MSMEG_4730	-6.73182	2.36181e-10	3.17987	1.16719e-11	226	172	199	0	0	0	73.163	81.248	74.387	0	0	0	conserved hypothetical protein
MSMEG_2659	2.76818	2.44013e-10	6.13611	1.20973e-11	64	36	48	112	105	61	20.719	17.005	17.943	83.927	83.743	41.173	K00259 alanine dehydrogenase [EC:1.4.1.1]
MSMEG_1056	1.93161	2.49818e-10	7.19272	1.24635e-11	376	313	322	372	284	383	121.722	147.852	120.364	278.757	226.505	258.515	pseudogene
MSMEG_1767	1.85644	2.55337e-10	8.64128	1.27789e-11	1798	1396	1316	1152	1577	1660	582.063	659.431	491.924	863.248	1257.74	1120.46	conserved hypothetical protein
MSMEG_0233	-1.96464	2.70869e-10	6.89094	1.36412e-11	591	442	585	33	39	37	191.323	208.788	218.675	24.728	31.105	24.974	lipoprotein Lpps
MSMEG_5895	-3.82476	2.70869e-10	5.1065	1.36117e-11	359	305	376	4	9	6	116.218	144.073	140.55	2.997	7.178	4.05	K02067 phospholipid/cholesterol/gamma-HCH transport system substrate-binding protein
MSMEG_3438	2.4073	2.76772e-10	10.2791	1.39819e-11	2488	1553	2115	3035	3162	2458	805.436	733.594	790.593	2274.27	2521.86	1659.08	hypothetical protein
MSMEG_5458	2.42018	2.7856e-10	4.37856	1.41159e-11	59	31	45	65	67	59	19.1	14.644	16.821	48.708	53.436	39.823	K22886 protein lysine acetyltransferase [EC:2.3.1.-]
MSMEG_0063	-4.29755	2.78957e-10	4.25573	1.41798e-11	452	289	335	4	4	5	146.325	136.515	125.224	2.997	3.19	3.375	PE family protein
MSMEG_0260	2.09088	2.82734e-10	5.57478	1.44433e-11	86	88	79	100	90	97	27.841	41.569	29.53	74.935	71.78	65.472	DNA-binding protein
MSMEG_2492	1.89297	2.82734e-10	4.97592	1.45936e-11	116	92	103	122	93	96	37.552	43.458	38.502	91.42	74.172	64.797	D-lactate dehydrogenase
MSMEG_3947	-3.41832	2.82734e-10	7.57525	1.45542e-11	5020	3571	3583	66	112	133	1625.12	1686.84	1339.34	49.457	89.326	89.771	K16370 6-phosphofructokinase 2 [EC:2.7.1.11]
MSMEG_4234	2.06187	2.82734e-10	6.44071	1.45622e-11	125	126	125	182	141	107	40.466	59.519	46.725	136.381	112.455	72.222	conserved hypothetical protein
MSMEG_6257	-2.60634	2.82734e-10	6.08931	1.45335e-11	327	266	347	14	11	15	105.859	125.651	129.71	10.491	8.773	10.125	K00928 aspartate kinase [EC:2.7.2.4]
MSMEG_5137	2.73388	2.82801e-10	3.33341	1.46414e-11	28	20	26	36	47	50	9.064	9.447	9.719	26.976	37.485	33.749	K00374 nitrate reductase gamma subunit [EC:1.7.5.1 1.7.99.-]
MSMEG_1625	1.90934	2.84668e-10	5.03744	1.47827e-11	162	125	158	165	166	120	52.444	59.046	59.061	123.642	132.394	80.997	amino acid transporter, putative
MSMEG_3225	-1.66592	3.04483e-10	6.00019	1.58595e-11	1035	760	821	78	76	65	335.059	359.003	306.892	58.449	60.614	43.873	K00265 glutamate synthase (NADPH) large chain [EC:1.4.1.13]
MSMEG_2714	5.41919	3.05045e-10	2.22598	1.59366e-11	6	5	4	37	73	85	1.942	2.362	1.495	27.726	58.221	57.373	hypothetical protein
MSMEG_1412	2.1746	3.31924e-10	5.48276	1.73929e-11	326	191	208	295	312	252	105.535	90.223	77.751	221.057	248.837	170.093	K03294 basic amino acid/polyamine antiporter, APA family
MSMEG_2752	1.75809	3.33797e-10	11.0829	1.75958e-11	6260	4174	5103	4370	4944	4604	2026.54	1971.68	1907.52	3274.65	3943.1	3107.58	K03087 RNA polymerase nonessential primary-like sigma factor
MSMEG_2959	1.96674	3.33797e-10	9.53148	1.75791e-11	1538	1282	1629	1444	1245	2050	497.894	605.581	608.925	1082.06	992.954	1383.69	K07250 4-aminobutyrate aminotransferase / (S)-3-amino-2-methylpropionate transaminase
MSMEG_2070	2.22733	3.3477e-10	5.41997	1.76996e-11	88	60	72	100	107	72	28.488	28.342	26.914	74.935	85.338	48.598	K00249 acyl-CoA dehydrogenase [EC:1.3.8.7]
MSMEG_2716	4.78964	3.39534e-10	4.51472	1.80048e-11	55	35	49	169	324	729	17.805	16.533	18.316	126.64	258.407	492.056	conserved hypothetical protein
MSMEG_2838	2.18018	3.39773e-10	5.31028	1.80708e-11	94	74	83	67	107	142	30.43	34.956	31.026	50.206	85.338	95.846	conserved hypothetical protein
MSMEG_2706	5.1017	3.48651e-10	3.79388	1.85976e-11	21	21	23	91	246	358	6.798	9.92	8.597	68.191	196.198	241.64	K03271 D-sedoheptulose 7-phosphate isomerase [EC:5.3.1.28]
MSMEG_1437	-3.86012	3.52871e-10	5.06549	1.88781e-11	297	212	269	2	6	6	96.147	100.143	100.553	1.499	4.785	4.05	K02926 large subunit ribosomal protein L4
MSMEG_0530	2.60372	3.58714e-10	7.13047	1.9247e-11	182	136	168	344	268	197	58.919	64.243	62.799	257.775	213.744	132.97	short chain dehydrogenase
MSMEG_3935	-1.86911	3.61203e-10	9.12842	1.94939e-11	7086	5033	5714	354	453	500	2293.94	2377.45	2135.91	265.269	361.292	337.487	conserved hypothetical protein
MSMEG_2702	4.8263	3.96852e-10	4.00919	2.14801e-11	21	16	25	73	191	276	6.798	7.558	9.345	54.702	152.333	186.293	K04654 hydrogenase expression/formation protein HypD
MSMEG_1629	-3.66888	3.97289e-10	5.27752	2.1566e-11	404	299	328	6	10	5	130.786	141.239	122.607	4.496	7.976	3.375	hypothetical protein
MSMEG_3273	2.03425	3.99635e-10	7.94526	2.17561e-11	988	738	747	672	899	1191	319.843	348.61	279.231	503.561	717	803.893	glutamyl aminopeptidase, M42 family protein
MSMEG_0531	-4.61625	4.01353e-10	4.59785	2.19126e-11	381	297	264	4	2	3	123.34	140.294	98.684	2.997	1.595	2.025	K00249 acyl-CoA dehydrogenase [EC:1.3.8.7]
MSMEG_1785	2.45197	4.04046e-10	4.24581	2.2123e-11	42	37	37	47	56	68	13.597	17.478	13.831	35.219	44.663	45.898	hypothetical protein
MSMEG_0755	2.04725	4.05516e-10	6.35119	2.22671e-11	208	170	189	250	234	156	67.335	80.303	70.649	187.337	186.627	105.296	K16264 cobalt-zinc-cadmium efflux system protein
MSMEG_0434	2.1769	4.07719e-10	7.2916	2.24521e-11	335	265	290	462	335	297	108.449	125.179	108.403	346.198	267.18	200.467	K17840 aminoglycoside 2'-N-acetyltransferase I [EC:2.3.1.59]
MSMEG_6615	1.87495	4.10932e-10	8.06332	2.26934e-11	896	652	869	704	835	821	290.06	307.986	324.835	527.54	665.957	554.153	hypothetical protein
MSMEG_4565	2.36426	4.41769e-10	4.8502	2.4535e-11	98	76	90	126	137	103	31.725	35.9	33.642	94.418	109.265	69.522	oxidoreductase
MSMEG_5947	2.96651	4.49117e-10	3.99043	2.50136e-11	33	17	14	45	39	45	10.683	8.03	5.233	33.721	31.105	30.374	K00640 serine O-acetyltransferase [EC:2.3.1.30]
MSMEG_0751	2.83463	4.57136e-10	3.94347	2.56036e-11	23	22	21	33	43	52	7.446	10.392	7.85	24.728	34.295	35.099	K07161 uncharacterized protein
MSMEG_1358	2.26127	4.57136e-10	7.60576	2.55386e-11	561	376	475	669	536	595	181.612	177.612	177.556	501.313	427.488	401.609	conserved hypothetical protein
MSMEG_5722	2.3035	4.75927e-10	8.79825	2.67308e-11	843	672	846	945	1175	1000	272.903	317.434	316.237	708.133	937.125	674.973	conserved hypothetical protein
MSMEG_5582	1.64313	4.85037e-10	6.7403	2.73186e-11	382	249	304	309	267	207	123.664	117.621	113.636	231.548	212.947	139.719	hypothetical protein
MSMEG_0748	3.32434	4.87155e-10	2.98912	2.75143e-11	28	16	18	40	56	74	9.064	7.558	6.728	29.974	44.663	49.948	ATPase associated with various cellular activities, AAA_5
MSMEG_3570	1.65767	4.88639e-10	6.75584	2.76747e-11	262	215	235	238	185	182	84.817	101.56	87.844	178.345	147.547	122.845	conserved hypothetical protein
MSMEG_5489	-3.63121	4.92797e-10	5.63961	2.79876e-11	239	217	304	5	6	4	77.371	102.505	113.636	3.747	4.785	2.7	K02911 large subunit ribosomal protein L32
MSMEG_0912	-4.75238	4.98823e-10	3.64639	2.85271e-11	270	180	192	2	2	1	87.407	85.027	71.77	1.499	1.595	0.675	K00074 3-hydroxybutyryl-CoA dehydrogenase [EC:1.1.1.157]
MSMEG_1758	2.76055	4.98823e-10	6.52678	2.85996e-11	263	220	220	483	481	329	85.141	103.922	82.237	361.935	383.623	222.066	hypothetical protein
MSMEG_4528	-3.53492	4.98823e-10	4.39014	2.86428e-11	192	146	146	2	4	4	62.156	68.966	54.575	1.499	3.19	2.7	K00390 phosphoadenosine phosphosulfate reductase [EC:1.8.4.8 1.8.4.10]
MSMEG_5037	1.72982	4.9962e-10	7.53886	2.8767e-11	536	423	395	419	406	370	173.518	199.813	147.652	313.976	323.807	249.74	K00104 glycolate dehydrogenase FAD-linked subunit [EC:1.1.99.14]
MSMEG_4734	-5.94044	5.20122e-10	3.51639	3.01106e-11	225	163	203	0	2	0	72.839	76.997	75.882	0	1.595	0	hypothetical protein
MSMEG_3226	-2.38352	5.29534e-10	5.38462	3.07385e-11	1091	833	768	35	53	49	353.187	393.486	287.08	26.227	42.27	33.074	K00266 glutamate synthase (NADPH) small chain [EC:1.4.1.13]
MSMEG_2720	4.08402	5.36601e-10	3.40927	3.13172e-11	21	12	21	51	84	125	6.798	5.668	7.85	38.217	66.994	84.372	K06282 hydrogenase small subunit [EC:1.12.99.6]
MSMEG_4550	3.27334	5.65365e-10	4.28263	3.31834e-11	34	24	25	40	74	121	11.007	11.337	9.345	29.974	59.019	81.672	transposase
MSMEG_4566	-2.70896	5.65365e-10	4.68533	3.31467e-11	573	345	395	11	21	21	185.496	162.968	147.652	8.243	16.749	14.174	pseudogene
MSMEG_6041	1.65938	5.65365e-10	6.24448	3.3262e-11	276	184	185	170	187	180	89.349	86.916	69.154	127.389	149.142	121.495	K22820 3-oxochol-4-en-24-oyl-CoA dehydrogenase [EC:1.3.99.-]
MSMEG_3954	-4.75178	5.67105e-10	4.71749	3.34533e-11	1006	722	990	3	14	13	325.671	341.053	370.065	2.248	11.166	8.775	trehalose 6-phosphate phosphorylase
MSMEG_6687	1.93303	5.84431e-10	5.12571	3.46588e-11	132	114	111	154	119	98	42.732	53.85	41.492	115.399	94.909	66.147	K22187 alpha-ketoglutaric semialdehyde dehydrogenase [EC:1.2.1.-]
MSMEG_2062	2.24558	5.89243e-10	3.91533	3.5094e-11	172	143	174	245	228	158	55.681	67.549	65.042	183.59	181.842	106.646	K00331 NADH-quinone oxidoreductase subunit B [EC:7.1.1.2]
MSMEG_2713	5.15238	5.89243e-10	4.24857	3.51882e-11	45	34	23	151	353	592	14.568	16.061	8.597	113.151	281.536	399.584	K03605 hydrogenase maturation protease [EC:3.4.23.-]
MSMEG_4125	2.21516	5.89243e-10	5.46289	3.52214e-11	69	43	43	57	66	67	22.337	20.312	16.074	42.713	52.639	45.223	oxidoreductase, short chain dehydrogenase/reductase family protein
MSMEG_3157	1.90752	5.92691e-10	7.48387	3.55206e-11	453	307	354	293	407	420	146.649	145.018	132.326	219.559	324.604	283.489	conserved hypothetical protein
MSMEG_5400	2.00505	6.00004e-10	9.53689	3.6053e-11	1737	1393	1503	1270	1759	2023	562.316	658.014	561.825	951.671	1402.9	1365.47	dehydrogenase
MSMEG_1428	-3.54715	6.11696e-10	3.94683	3.68515e-11	334	260	275	5	4	11	108.125	122.817	102.796	3.747	3.19	7.425	glucose-methanol-choline oxidoreductase
MSMEG_0932	-3.60457	6.32834e-10	6.14127	3.83235e-11	388	324	405	10	5	9	125.607	153.048	151.39	7.493	3.988	6.075	ROK family protein
MSMEG_3463	1.69866	6.32834e-10	4.90231	3.82302e-11	125	117	116	94	98	119	40.466	55.268	43.361	70.439	78.16	80.322	K03932 polyhydroxybutyrate depolymerase
MSMEG_1296	2.33233	6.41444e-10	5.2035	3.90202e-11	110	88	102	90	158	169	35.61	41.569	38.128	67.441	126.013	114.07	K00365 urate oxidase [EC:1.7.3.3]
MSMEG_5474	1.74843	6.41444e-10	5.8027	3.90461e-11	210	182	143	133	165	180	67.983	85.972	53.454	99.663	131.596	121.495	universal stress protein family protein
MSMEG_3930	-7.65755	6.48803e-10	3.23741	3.95959e-11	927	682	781	0	0	4	300.096	322.158	291.94	0	0	2.7	[NiFe] hydrogenase, gamma subunit, putative
MSMEG_1413	2.95921	6.49519e-10	4.90907	3.97415e-11	118	90	82	276	222	131	38.2	42.513	30.652	206.82	177.057	88.422	K00819 ornithine--oxo-acid transaminase [EC:2.6.1.13]
MSMEG_1622	-2.38499	6.78926e-10	5.32518	4.16473e-11	1610	1144	977	37	72	87	521.202	540.393	365.205	27.726	57.424	58.723	K14161 protein ImuB
MSMEG_0697	2.38539	6.84576e-10	9.09146	4.21013e-11	1670	1197	1465	1767	2028	2246	540.626	565.429	547.621	1324.1	1617.44	1515.99	integral membrane protein
MSMEG_5021	2.23214	6.90476e-10	4.30458	4.26808e-11	55	54	48	50	68	81	17.805	25.508	17.943	37.467	54.234	54.673	K00004 (R,R)-butanediol dehydrogenase / meso-butanediol dehydrogenase / diacetyl reductase
MSMEG_5272	1.85469	6.98967e-10	7.09232	4.33153e-11	263	231	265	290	265	191	85.141	109.118	99.058	217.311	211.352	128.92	conserved exported protein
MSMEG_1519	-2.21738	7.02667e-10	6.95282	4.37651e-11	842	563	799	28	43	57	272.579	265.945	298.668	20.982	34.295	38.473	K02518 translation initiation factor IF-1
MSMEG_2069	2.5886	7.02667e-10	4.83365	4.36969e-11	56	42	38	86	90	50	18.129	19.84	14.205	64.444	71.78	33.749	phosphotransferase enzyme family protein
MSMEG_3465	1.82446	7.03097e-10	7.04205	4.39022e-11	187	136	155	191	150	119	60.537	64.243	57.939	143.125	119.633	80.322	K00666 fatty-acyl-CoA synthase [EC:6.2.1.-]
MSMEG_6819	2.30812	7.26235e-10	7.91918	4.54609e-11	628	498	484	748	657	721	203.301	235.241	180.921	560.512	523.992	486.656	pseudogene
MSMEG_6305	3.26093	7.50182e-10	7.09608	4.70777e-11	315	176	223	702	690	440	101.974	83.137	83.358	526.042	550.312	296.988	conserved hypothetical protein
MSMEG_2376	2.9867	7.62756e-10	9.82796	4.79864e-11	1978	1273	1506	3790	3567	2702	640.334	601.329	562.947	2840.03	2844.87	1823.78	conserved hypothetical protein
MSMEG_3522	1.65908	8.04581e-10	5.58122	5.07439e-11	224	173	162	142	160	167	72.515	81.72	60.556	106.407	127.608	112.721	dopamine receptor D4
MSMEG_6642	1.6728	8.10936e-10	5.33231	5.12719e-11	244	187	229	168	187	207	78.99	88.334	85.601	125.89	149.142	139.719	caib/baif family protein
MSMEG_1394	-3.8909	8.18632e-10	4.06786	5.1887e-11	262	179	274	2	5	5	84.817	84.555	102.422	1.499	3.988	3.375	probable conserved transmembrane protein
MSMEG_0301	1.9676	8.77881e-10	6.15135	5.578e-11	117	124	105	117	112	131	37.876	58.574	39.249	87.674	89.326	88.422	K00104 glycolate dehydrogenase FAD-linked subunit [EC:1.1.99.14]
MSMEG_1497	1.78466	8.93719e-10	5.85896	5.70262e-11	253	191	200	222	210	164	81.903	90.223	74.761	166.355	167.486	110.696	acyl-CoA dehydrogenase family protein member 8
MSMEG_5783	-2.39291	8.93719e-10	4.9987	5.70668e-11	279	242	292	14	13	13	90.32	114.314	109.15	10.491	10.368	8.775	pseudogene
MSMEG_1775	1.84703	9.20362e-10	8.63782	5.89124e-11	1477	1060	1079	859	1271	1386	478.147	500.714	403.333	643.689	1013.69	935.513	cytochrome P450 monooxygenase
MSMEG_1633	-2.10638	9.49016e-10	5.36046	6.10443e-11	537	395	454	22	24	41	173.842	186.587	169.706	16.486	19.141	27.674	K14162 error-prone DNA polymerase [EC:2.7.7.7]
MSMEG_1943	-1.8788	9.49016e-10	6.37948	6.10428e-11	969	681	711	41	53	80	313.693	321.685	265.774	30.723	42.27	53.998	K03657 ATP-dependent DNA helicase UvrD/PcrA [EC:5.6.2.4]
MSMEG_4688	-2.57054	1.02524e-09	4.72042	6.62692e-11	275	204	221	9	11	10	89.025	96.364	82.61	6.744	8.773	6.75	conserved hypothetical protein, putative
MSMEG_3638	1.87377	1.03281e-09	6.7604	6.69207e-11	263	224	257	268	255	210	85.141	105.811	96.067	200.825	203.376	141.744	K03699 magnesium and cobalt exporter, CNNM family
MSMEG_6783	-2.20346	1.03994e-09	5.81413	6.75453e-11	551	396	454	20	26	35	178.374	187.059	169.706	14.987	20.736	23.624	integral membrane protein
MSMEG_2724	-1.96534	1.05305e-09	7.18889	6.8562e-11	1744	1488	1542	84	109	138	564.582	702.889	576.404	62.945	86.933	93.146	K03565 regulatory protein
MSMEG_2514	-3.90894	1.12339e-09	2.47273	7.36499e-11	108	98	94	1	1	2	34.963	46.292	35.137	0.749	0.798	1.35	pseudogene
MSMEG_2709	6.13358	1.12339e-09	-0.225546	7.36709e-11	0	0	0	5	9	15	0	0	0	3.747	7.178	10.125	hypothetical protein
MSMEG_2346	1.82427	1.13821e-09	7.93245	7.4821e-11	1094	815	1041	928	973	880	354.159	384.983	389.129	695.394	776.019	593.977	K02291 15-cis-phytoene synthase [EC:2.5.1.32]
MSMEG_4256	-3.85114	1.17078e-09	4.72932	7.71456e-11	250	227	284	3	4	6	80.932	107.228	106.16	2.248	3.19	4.05	K21471 peptidoglycan DL-endopeptidase CwlO [EC:3.4.-.-]
MSMEG_4326	-4.75051	1.20966e-09	5.27599	7.98975e-11	838	605	610	3	11	7	271.284	285.785	228.02	2.248	8.773	4.725	K02078 acyl carrier protein
MSMEG_2486	1.84398	1.21505e-09	3.87562	8.04444e-11	87	59	71	66	68	73	28.164	27.87	26.54	49.457	54.234	49.273	K03762 MFS transporter, MHS family, proline/betaine transporter
MSMEG_4191	1.71093	1.22612e-09	6.01127	8.13693e-11	169	155	133	159	133	111	54.71	73.218	49.716	119.146	106.075	74.922	conserved hypothetical protein
MSMEG_2336	1.74569	1.23152e-09	7.19154	8.19209e-11	355	364	373	313	288	386	114.924	171.943	139.428	234.546	229.695	260.54	pseudogene
MSMEG_4362	1.80174	1.24022e-09	5.54064	8.2694e-11	163	97	106	124	115	98	52.768	45.82	39.623	92.919	91.719	66.147	universal stress protein family protein
MSMEG_6079	-2.47708	1.28693e-09	5.28652	8.62123e-11	326	254	321	12	13	17	105.535	119.982	119.991	8.992	10.368	11.475	K04485 DNA repair protein RadA/Sms
MSMEG_3050	-2.38406	1.3064e-09	8.48032	8.77221e-11	1754	1280	1576	48	74	129	567.819	604.636	589.113	35.969	59.019	87.072	integration host factor
MSMEG_1624	1.90748	1.34636e-09	5.66663	9.06163e-11	446	274	321	364	366	301	144.383	129.43	119.991	272.762	291.904	203.167	universal stress protein family protein
MSMEG_1952	-1.96033	1.42123e-09	6.02624	9.61015e-11	379	302	372	24	25	22	122.693	142.656	139.055	17.984	19.939	14.849	K03657 ATP-dependent DNA helicase UvrD/PcrA [EC:5.6.2.4]
MSMEG_1407	2.72553	1.43968e-09	4.17341	9.7575e-11	36	26	55	58	70	72	11.654	12.282	20.559	43.462	55.829	48.598	pseudogene
MSMEG_0685	1.86209	1.46088e-09	8.16513	9.92407e-11	936	678	773	546	870	954	303.01	320.268	288.949	409.144	693.871	643.925	K11178 xanthine dehydrogenase YagS FAD-binding subunit [EC:1.17.1.4]
MSMEG_4657	2.59945	1.46854e-09	3.62722	9.99915e-11	35	29	39	38	65	68	11.33	13.699	14.578	28.475	51.841	45.898	K02057 simple sugar transport system permease protein
MSMEG_0408	-2.27018	1.52184e-09	8.70345	1.0386e-10	3826	2720	2999	90	213	273	1238.58	1284.85	1121.03	67.441	169.879	184.268	type I modular polyketide synthase
MSMEG_6272	-2.68185	1.65133e-09	4.04498	1.12956e-10	797	627	662	14	34	46	258.011	296.177	247.457	10.491	27.117	31.049	K15371 glutamate dehydrogenase [EC:1.4.1.2]
MSMEG_1583	-3.02249	1.79141e-09	6.1351	1.231e-10	1248	834	932	13	37	65	404.013	393.958	348.384	9.742	29.509	43.873	K04077 chaperonin GroEL [EC:5.6.1.7]
MSMEG_1759	2.5987	1.80701e-09	3.34883	1.24455e-10	52	42	45	86	66	75	16.834	19.84	16.821	64.444	52.639	50.623	hypothetical protein
MSMEG_4262	-1.82457	1.82096e-09	6.52981	1.25702e-10	755	485	596	31	53	55	244.415	229.1	222.786	23.23	42.27	37.124	K03890 quinol---cytochrome c reductase iron-sulfur subunit [EC:7.1.1.8]
MSMEG_4236	1.95206	1.83438e-09	8.97407	1.26916e-10	661	456	608	717	754	380	213.984	215.402	227.272	537.282	601.355	256.49	K03925 transcriptional regulator MraZ
MSMEG_4653	2.063	1.98377e-09	6.6129	1.37563e-10	175	168	152	190	155	211	56.652	79.358	56.818	142.376	123.621	142.419	K01816 hydroxypyruvate isomerase [EC:5.3.1.22]
MSMEG_1768	1.72525	1.99363e-09	8.86273	1.38559e-10	2067	1672	1846	1288	1789	1923	669.146	789.806	690.04	965.159	1426.82	1297.97	conserved hypothetical protein
MSMEG_3624	-4.75976	2.00444e-09	2.91434	1.39625e-10	84	55	81	0	0	1	27.193	25.98	30.278	0	0	0.675	K03188 urease accessory protein
MSMEG_4664	2.28752	2.03432e-09	4.65324	1.42321e-10	84	42	67	62	74	119	27.193	19.84	25.045	46.46	59.019	80.322	K03336 3D-(3,5/4)-trihydroxycyclohexane-1,2-dione acylhydrolase (decyclizing) [EC:3.7.1.22]
MSMEG_5287	1.70936	2.03432e-09	6.49162	1.42345e-10	202	138	141	146	145	126	65.393	65.187	52.706	109.405	115.645	85.047	dehydrogenase
MSMEG_2347	1.70361	2.04512e-09	10.0634	1.43421e-10	4779	4020	4254	3892	3759	3716	1547.1	1898.93	1590.16	2916.46	2998	2508.2	K10027 phytoene desaturase [EC:1.3.99.26 1.3.99.28 1.3.99.29 1.3.99.31]
MSMEG_4624	-4.75395	2.05226e-09	3.99451	1.44319e-10	204	135	164	0	2	3	66.041	63.77	61.304	0	1.595	2.025	K02899 large subunit ribosomal protein L27
MSMEG_1419	-4.65945	2.05517e-09	2.50136	1.45232e-10	112	78	107	0	1	1	36.258	36.845	39.997	0	0.798	0.675	conserved hypothetical protein
MSMEG_6056	3.77447	2.05517e-09	4.3264	1.45416e-10	30	20	31	47	122	164	9.712	9.447	11.588	35.219	97.301	110.696	pseudogene
MSMEG_1467	-3.09025	2.11218e-09	4.84868	1.49781e-10	302	228	282	4	11	11	97.766	107.701	105.412	2.997	8.773	7.425	K02931 large subunit ribosomal protein L5
MSMEG_0391	-1.89652	2.15703e-09	7.08011	1.53638e-10	575	430	533	30	45	35	186.144	203.12	199.237	22.48	35.89	23.624	Rmt3 protein
MSMEG_3703	1.87469	2.15703e-09	8.73429	1.53403e-10	2308	1817	1886	1457	1898	2709	747.165	858.3	704.992	1091.8	1513.76	1828.5	hypothetical protein
MSMEG_5144	1.85532	2.20662e-09	4.52022	1.57863e-10	84	58	57	65	67	59	27.193	27.398	21.307	48.708	53.436	39.823	K17641 beta-xylosidase
MSMEG_6309	-4.34773	2.21509e-09	3.58087	1.58816e-10	161	117	130	1	1	2	52.12	55.268	48.594	0.749	0.798	1.35	K10010 L-cystine transport system ATP-binding protein [EC:7.4.2.1]
MSMEG_1792	2.75893	2.24454e-09	8.8453	1.6128e-10	1413	956	1093	2280	2371	1638	457.428	451.588	408.566	1708.51	1891	1105.61	conserved hypothetical protein
MSMEG_6157	-1.9111	2.27838e-09	6.83188	1.64069e-10	636	466	556	36	38	42	205.891	220.125	207.834	26.976	30.307	28.349	K03168 DNA topoisomerase I [EC:5.6.2.1]
MSMEG_3953	-4.92878	2.2954e-09	4.4678	1.65655e-10	794	635	812	4	9	6	257.04	299.956	303.528	2.997	7.178	4.05	K00648 3-oxoacyl-[acyl-carrier-protein] synthase III [EC:2.3.1.180]
MSMEG_2707	5.1411	2.33265e-09	3.57785	1.68709e-10	16	11	14	59	155	247	5.18	5.196	5.233	44.211	123.621	166.718	hypothetical protein
MSMEG_1106	1.98367	2.37903e-09	4.5552	1.7281e-10	74	61	61	58	59	94	23.956	28.815	22.802	43.462	47.056	63.447	transcriptional regulator, AraC family protein
MSMEG_3777	-3.31665	2.42329e-09	5.03417	1.76405e-10	204	192	201	4	4	7	66.041	90.695	75.134	2.997	3.19	4.725	K01890 phenylalanyl-tRNA synthetase beta chain [EC:6.1.1.20]
MSMEG_5911	2.59406	2.43888e-09	4.08953	1.77923e-10	35	14	27	35	39	45	11.33	6.613	10.093	26.227	31.105	30.374	AraC family protein transcriptional regulator
MSMEG_5342	1.77069	2.44145e-09	9.73956	1.78494e-10	3098	2563	2107	2082	2233	2748	1002.91	1210.69	787.602	1560.14	1780.94	1854.83	conserved hypothetical protein
MSMEG_2719	5.31327	2.49293e-09	3.09796	1.82648e-10	7	8	17	55	139	163	2.266	3.779	6.355	41.214	110.86	110.021	K06281 hydrogenase large subunit [EC:1.12.99.6]
MSMEG_6306	2.30053	2.49994e-09	6.04662	1.83554e-10	86	89	81	139	113	90	27.841	42.041	30.278	104.159	90.124	60.748	K01885 glutamyl-tRNA synthetase [EC:6.1.1.17]
MSMEG_0917	1.74273	2.62552e-09	6.87599	1.93186e-10	161	111	151	173	110	104	52.12	52.433	56.444	129.637	87.731	70.197	conserved hypothetical protein
MSMEG_2903	3.40558	2.78069e-09	4.33782	2.0504e-10	37	19	33	46	84	144	11.978	8.975	12.335	34.47	66.994	97.196	pseudogene
MSMEG_0028	-1.86313	2.83121e-09	6.87672	2.0966e-10	674	510	552	41	30	59	218.193	240.91	206.339	30.723	23.927	39.823	K12132 eukaryotic-like serine/threonine-protein kinase [EC:2.7.11.1]
MSMEG_3694	1.984	2.83121e-09	6.03863	2.09332e-10	130	104	96	146	134	80	42.085	49.127	35.885	109.405	106.872	53.998	feruloyl-CoA synthetase
MSMEG_4233	2.05761	2.83121e-09	6.92201	2.10097e-10	180	148	138	228	188	120	58.271	69.911	51.585	170.851	149.94	80.997	K03587 cell division protein FtsI (penicillin-binding protein 3) [EC:3.4.16.4]
MSMEG_5839	-3.21773	2.84426e-09	5.27936	2.11512e-10	219	182	203	6	3	8	70.896	85.972	75.882	4.496	2.393	5.4	K01354 oligopeptidase B [EC:3.4.21.83]
MSMEG_4658	2.05624	2.8615e-09	5.09895	2.13243e-10	123	73	84	74	119	120	39.819	34.483	31.399	55.452	94.909	80.997	K02058 simple sugar transport system substrate-binding protein
MSMEG_1941	-1.69876	2.94765e-09	6.70767	2.20126e-10	1170	889	908	56	93	99	378.762	419.939	339.413	41.963	74.172	66.822	helicase, UvrD/Rep family protein
MSMEG_0529	2.00874	3.01846e-09	6.68176	2.25888e-10	276	218	269	219	256	361	89.349	102.977	100.553	164.107	204.174	243.665	K13419 serine/threonine-protein kinase PknK [EC:2.7.11.1]
MSMEG_3938	-6.36069	3.07564e-09	3.52145	2.31131e-10	843	562	805	1	2	3	272.903	265.473	300.911	0.749	1.595	2.025	hypothetical protein
MSMEG_5343	1.73439	3.07564e-09	10.373	2.30725e-10	4368	3157	3042	2861	2940	3538	1414.05	1491.28	1137.11	2143.88	2344.81	2388.06	conserved hypothetical protein
MSMEG_4336	1.70776	3.12618e-09	10.0718	2.3542e-10	1609	1331	1435	1562	1225	1079	520.879	628.727	536.407	1170.48	977.003	728.296	conserved hypothetical protein
MSMEG_0786	2.22692	3.16402e-09	6.38503	2.38766e-10	170	134	141	230	206	135	55.034	63.298	52.706	172.35	164.296	91.121	K14949 serine/threonine-protein kinase PknG [EC:2.7.11.1]
MSMEG_6214	1.61944	3.17436e-09	5.80902	2.40044e-10	97	89	88	87	69	70	31.402	42.041	32.895	65.193	55.031	47.248	K09117 uncharacterized protein
MSMEG_2072	2.15466	3.24287e-09	4.65783	2.46243e-10	53	35	46	70	54	40	17.158	16.533	17.195	52.454	43.068	26.999	K01640 hydroxymethylglutaryl-CoA lyase [EC:4.1.3.4]
MSMEG_1982	1.71876	3.37471e-09	5.21042	2.58901e-10	103	71	68	60	76	75	33.344	33.538	25.419	44.961	60.614	50.623	acyl-CoA synthase
MSMEG_3200	-2.20131	3.37471e-09	7.55005	2.5848e-10	1810	1507	1420	122	100	63	585.948	711.864	530.8	91.42	79.755	42.523	K00278 L-aspartate oxidase [EC:1.4.3.16]
MSMEG_1411	1.81315	3.43258e-09	5.87206	2.64464e-10	257	197	214	217	220	190	83.198	93.057	79.994	162.608	175.462	128.245	universal stress protein family protein
MSMEG_3182	1.88094	3.5602e-09	5.86321	2.75924e-10	149	102	125	131	132	107	48.236	48.182	46.725	98.164	105.277	72.222	hypothetical protein
MSMEG_3630	-2.11604	3.5602e-09	7.45883	2.75646e-10	773	626	726	59	50	28	250.242	295.705	271.381	44.211	39.878	18.899	K02171 BlaI family transcriptional regulator, penicillinase repressor
MSMEG_2487	1.89323	3.68682e-09	3.67373	2.86894e-10	78	57	59	56	68	68	25.251	26.925	22.054	41.963	54.234	45.898	K00823 4-aminobutyrate aminotransferase [EC:2.6.1.19]
MSMEG_1886	-2.18962	3.69341e-09	8.4272	2.87987e-10	5447	3714	4968	150	326	412	1763.35	1754.39	1857.05	112.402	260.002	278.089	K22769 NADPH-dependent stearoyl-CoA 9-desaturase [EC:1.14.19.-]
MSMEG_5923	2.44493	3.69478e-09	3.75033	2.88673e-10	39	22	32	42	40	53	12.625	10.392	11.962	31.473	31.902	35.774	K00626 acetyl-CoA C-acetyltransferase [EC:2.3.1.9]
MSMEG_5004	-1.98467	3.71241e-09	6.20209	2.90633e-10	592	430	444	26	27	47	191.647	203.12	165.968	19.483	21.534	31.724	DNA repair exonuclease
MSMEG_1399	-4.84585	3.77404e-09	4.47042	2.96409e-10	217	181	218	2	0	5	70.249	85.499	81.489	1.499	0	3.375	K02992 small subunit ribosomal protein S7
MSMEG_5703	-3.58859	3.77404e-09	4.38749	2.96642e-10	125	89	106	1	2	3	40.466	42.041	39.623	0.749	1.595	2.025	K03637 cyclic pyranopterin monophosphate synthase [EC:4.6.1.17]
MSMEG_2286	1.75088	4.07588e-09	5.06584	3.21645e-10	93	74	80	89	75	61	30.107	34.956	29.904	66.692	59.816	41.173	aminoglycoside phosphotransferase
MSMEG_5897	-3.08009	4.18995e-09	4.48599	3.31304e-10	289	204	208	5	9	7	93.557	96.364	77.751	3.747	7.178	4.725	K02067 phospholipid/cholesterol/gamma-HCH transport system substrate-binding protein
MSMEG_0948	-2.92675	4.25298e-09	5.29986	3.37623e-10	160	134	159	7	4	4	51.797	63.298	59.435	5.245	3.19	2.7	K27074 meromycolic acid (3R)-3-hydroxyacyl-[acyl carrier protein] dehydratase HadD [EC:4.2.1.-]
MSMEG_1293	-2.7341	4.25298e-09	4.0149	3.3715e-10	345	239	292	10	8	17	111.686	112.897	109.15	7.493	6.38	11.475	K24206 uric acid transporter
MSMEG_6387	-2.52742	4.29945e-09	5.54987	3.41986e-10	287	205	233	7	13	13	92.91	96.836	87.096	5.245	10.368	8.775	K11387 arabinosyltransferase C [EC:2.4.2.-]
MSMEG_1558	-2.00499	4.39542e-09	7.24296	3.5031e-10	1163	818	1003	37	77	95	376.496	386.4	374.924	27.726	61.412	64.122	conserved hypothetical protein
MSMEG_5577	1.87657	4.48069e-09	6.17515	3.57808e-10	166	122	146	144	118	166	53.739	57.629	54.575	107.906	94.111	112.046	K00847 fructokinase [EC:2.7.1.4]
MSMEG_1180	3.19581	4.63442e-09	3.78688	3.70812e-10	22	23	20	71	73	30	7.122	10.865	7.476	53.204	58.221	20.249	K06016 beta-ureidopropionase / N-carbamoyl-L-amino-acid hydrolase [EC:3.5.1.6 3.5.1.87]
MSMEG_3443	1.81778	4.63828e-09	8.23021	3.71848e-10	1061	774	965	679	899	1094	343.476	365.616	360.72	508.807	717	738.421	hypothetical protein
MSMEG_2194	1.86338	4.72784e-09	4.68655	3.7977e-10	223	114	131	165	163	118	72.191	53.85	48.968	123.642	130.001	79.647	K21744 MerR family transcriptional regulator, thiopeptide resistance regulator
MSMEG_5700	-2.98939	4.74384e-09	6.07057	3.81799e-10	433	312	364	8	12	17	140.174	147.38	136.064	5.995	9.571	11.475	K21687 resuscitation-promoting factor RpfA
MSMEG_2351	-1.88436	4.94199e-09	7.07931	3.98523e-10	822	534	600	42	36	64	266.105	252.247	224.282	31.473	28.712	43.198	K03521 electron transfer flavoprotein beta subunit
MSMEG_3864	-2.16803	5.13417e-09	6.93099	4.14825e-10	398	266	330	24	21	14	128.844	125.651	123.355	17.984	16.749	9.45	K02230 cobaltochelatase CobN [EC:6.6.1.2]
MSMEG_5251	1.60969	5.23725e-09	6.60209	4.23976e-10	233	211	218	141	177	232	75.429	99.67	81.489	105.658	141.167	156.594	hypothetical protein
MSMEG_0946	-1.80802	5.24299e-09	7.35296	4.25263e-10	645	519	552	31	49	52	208.805	245.161	206.339	23.23	39.08	35.099	K01784 UDP-glucose 4-epimerase [EC:5.1.3.2]
MSMEG_3054	-2.57731	5.26041e-09	5.42134	4.27501e-10	273	276	303	10	14	13	88.378	130.375	113.262	7.493	11.166	8.775	K13038 phosphopantothenoylcysteine decarboxylase / phosphopantothenate---cysteine ligase [EC:4.1.1.3]
MSMEG_1436	-2.82501	5.50486e-09	4.92527	4.4823e-10	172	147	182	4	8	6	55.681	69.439	68.032	2.997	6.38	4.05	K02906 large subunit ribosomal protein L3
MSMEG_5483	-3.80633	5.88812e-09	3.51757	4.81285e-10	361	232	329	10	2	7	116.866	109.59	122.981	7.493	1.595	4.725	porin
MSMEG_0005	-1.99389	5.93182e-09	7.39044	4.87649e-10	705	477	566	31	38	47	228.228	225.321	211.572	23.23	30.307	31.724	K02470 DNA gyrase subunit B [EC:5.6.2.2]
MSMEG_1910	2.90755	5.93182e-09	3.80643	4.8692e-10	15	13	25	27	43	35	4.856	6.141	9.345	20.232	34.295	23.624	muconate cycloisomerase
MSMEG_3201	-2.53798	5.98269e-09	6.19539	4.92769e-10	625	493	597	38	31	15	202.33	232.879	223.16	28.475	24.724	10.125	K00767 nicotinate-nucleotide pyrophosphorylase (carboxylating) [EC:2.4.2.19]
MSMEG_6502	2.35464	6.20578e-09	4.21543	5.12118e-10	31	20	24	38	30	35	10.036	9.447	8.971	28.475	23.927	23.624	conserved hypothetical protein
MSMEG_0787	2.50198	6.38122e-09	5.75964	5.28598e-10	120	83	86	245	137	92	38.847	39.207	32.147	183.59	109.265	62.098	K02030 polar amino acid transport system substrate-binding protein
MSMEG_2915	2.08948	6.48749e-09	3.98682	5.38419e-10	52	32	43	44	54	46	16.834	15.116	16.074	32.971	43.068	31.049	K07656 two-component system, OmpR family, sensor histidine kinase TrcS [EC:2.7.13.3]
MSMEG_6396	-2.88125	6.92918e-09	4.78661	5.7725e-10	281	178	220	7	7	9	90.968	84.082	82.237	5.245	5.583	6.075	antigen 85-C
MSMEG_1445	-3.59013	6.98162e-09	4.18229	5.82715e-10	234	173	191	2	4	7	75.752	81.72	71.396	1.499	3.19	4.725	K02961 small subunit ribosomal protein S17
MSMEG_6779	1.69177	7.01885e-09	5.97809	5.86923e-10	113	112	91	89	83	99	36.581	52.906	34.016	66.692	66.197	66.822	conserved hypothetical protein, putative
MSMEG_5134	-4.86372	7.14716e-09	2.41554	5.99895e-10	148	107	147	1	2	0	47.912	50.544	54.949	0.749	1.595	0	hypothetical protein
MSMEG_1028	-1.68421	7.2034e-09	6.86346	6.05746e-10	402	338	416	27	34	34	130.139	159.662	155.502	20.232	27.117	22.949	K21401 menaquinone-9 beta-reductase [EC:1.3.99.38]
MSMEG_5352	2.03326	7.308e-09	6.88404	6.15688e-10	226	146	146	270	186	129	73.163	68.966	54.575	202.324	148.345	87.072	K06975 uncharacterized protein
MSMEG_5496	1.67938	7.36558e-09	7.06694	6.21695e-10	548	342	375	372	334	359	177.403	161.551	140.176	278.757	266.383	242.315	MscS Mechanosensitive ion channel
MSMEG_0605	2.54812	7.55019e-09	4.17923	6.38462e-10	29	28	32	61	35	47	9.388	13.226	11.962	45.71	27.914	31.724	conserved hypothetical protein
MSMEG_2344	1.63497	7.71008e-09	8.11029	6.53757e-10	954	726	896	730	747	657	308.837	342.942	334.927	547.023	595.772	443.457	K09879 carotenoid phi-ring synthase / carotenoid chi-ring synthase [EC:1.3.99.39 1.3.99.40]
MSMEG_5215	-3.38703	7.71008e-09	4.02999	6.54401e-10	269	174	176	2	8	6	87.083	82.193	65.789	1.499	6.38	4.05	conserved hypothetical protein
MSMEG_5572	3.13879	7.7311e-09	3.86988	6.58611e-10	25	12	23	39	49	52	8.093	5.668	8.597	29.225	39.08	35.099	K10229 polyol transport system permease protein
MSMEG_3928	-3.74469	7.95357e-09	3.72508	6.78811e-10	224	169	233	3	4	4	72.515	79.831	87.096	2.248	3.19	2.7	[NiFe] hydrogenase, alpha subunit, putative
MSMEG_2712	4.83812	8.05538e-09	2.76544	6.88764e-10	15	11	15	47	111	227	4.856	5.196	5.607	35.219	88.528	153.219	K04653 hydrogenase expression/formation protein HypC
MSMEG_5457	2.09106	8.28711e-09	3.96626	7.11178e-10	42	33	36	38	58	34	13.597	15.588	13.457	28.475	46.258	22.949	shikimate 5-dehydrogenase
MSMEG_0497	2.33076	8.39254e-09	3.79145	7.2286e-10	35	30	37	37	51	50	11.33	14.171	13.831	27.726	40.675	33.749	glycerol dehydratase large subunit
MSMEG_5953	2.3819	8.39254e-09	3.99363	7.22552e-10	51	32	46	62	50	68	16.51	15.116	17.195	46.46	39.878	45.898	hypothetical protein
MSMEG_4739	-3.93846	8.39269e-09	2.82837	7.26197e-10	50	30	44	0	0	1	16.186	14.171	16.447	0	0	0.675	conserved hypothetical protein
MSMEG_5303	1.83029	8.39269e-09	4.97856	7.26822e-10	95	57	89	76	77	73	30.754	26.925	33.268	56.95	61.412	49.273	K11928 sodium/proline symporter
MSMEG_1817	1.72992	8.52518e-09	8.26574	7.39969e-10	596	427	568	498	506	404	192.942	201.703	212.32	373.175	403.562	272.689	probable conserved transmembrane protein
MSMEG_4970	1.88821	8.52518e-09	4.89914	7.40971e-10	70	61	62	74	70	50	22.661	28.815	23.176	55.452	55.829	33.749	hypothetical protein
MSMEG_1741	-4.10721	8.68253e-09	3.47502	7.58734e-10	230	147	237	3	2	3	74.457	69.439	88.591	2.248	1.595	2.025	TetR-family protein transcriptional regulator
MSMEG_3869	2.21789	9.10388e-09	3.99317	7.96982e-10	57	46	52	38	85	80	18.453	21.729	19.438	28.475	67.792	53.998	conserved hypothetical protein
MSMEG_6271	-1.96264	9.40074e-09	5.62619	8.24445e-10	358	236	300	23	20	17	115.895	111.48	112.141	17.235	15.951	11.475	K01649 2-isopropylmalate synthase [EC:2.3.3.13]
MSMEG_2093	1.77462	9.5302e-09	16.7789	8.37294e-10	521140	279156	369177	353954	355238	329546	168708	131865	137999	265234	283321	222435	K15035 transfer-messenger RNA
MSMEG_5116	2.41808	9.62935e-09	4.46215	8.47515e-10	32	24	22	50	37	28	10.359	11.337	8.224	37.467	29.509	18.899	K09763 uncharacterized protein
MSMEG_0966	1.67835	9.64908e-09	4.24927	8.50766e-10	72	48	62	55	47	53	23.308	22.674	23.176	41.214	37.485	35.774	conserved hypothetical protein
MSMEG_5121	-2.46649	9.99905e-09	5.9028	8.84761e-10	313	257	304	11	19	12	101.327	121.4	113.636	8.243	15.154	8.1	aminotransferase, classes I and II
MSMEG_3577	1.79624	1.00955e-08	4.53	8.94878e-10	63	68	69	51	66	68	20.395	32.121	25.792	38.217	52.639	45.898	calpastatin
MSMEG_1435	-4.03799	1.01936e-08	4.64422	9.05173e-10	172	136	163	2	4	1	55.681	64.243	60.93	1.499	3.19	0.675	K02946 small subunit ribosomal protein S10
MSMEG_5908	2.57831	1.02702e-08	2.93388	9.13591e-10	18	16	19	23	38	26	5.827	7.558	7.102	17.235	30.307	17.549	K00666 fatty-acyl-CoA synthase [EC:6.2.1.-]
MSMEG_1568	-2.55346	1.03955e-08	5.61863	9.26363e-10	247	216	269	9	12	11	79.961	102.032	100.553	6.744	9.571	7.425	K00820 glutamine---fructose-6-phosphate transaminase (isomerizing) [EC:2.6.1.16]
MSMEG_4590	1.69161	1.04066e-08	5.46427	9.28989e-10	102	96	115	92	87	90	33.02	45.348	42.987	68.94	69.387	60.748	ssuD; nitrilotriacetate monooxygenase component A
MSMEG_1666	1.61536	1.05341e-08	5.75116	9.42025e-10	122	102	113	104	89	84	39.495	48.182	42.24	77.932	70.982	56.698	K03088 RNA polymerase sigma-70 factor, ECF subfamily
MSMEG_1525	-4.10489	1.07583e-08	5.69015	9.63758e-10	559	336	430	2	9	12	180.964	158.717	160.735	1.499	7.178	8.1	K02879 large subunit ribosomal protein L17
MSMEG_1913	2.86252	1.14932e-08	3.49006	1.03319e-09	12	21	22	23	37	45	3.885	9.92	8.224	17.235	29.509	30.374	K03976 Cys-tRNA(Pro)/Cys-tRNA(Cys) deacylase [EC:3.1.1.-]
MSMEG_3951	-5.92173	1.19013e-08	3.43944	1.07362e-09	499	379	479	1	3	1	161.54	179.029	179.051	0.749	2.393	0.675	K00648 3-oxoacyl-[acyl-carrier-protein] synthase III [EC:2.3.1.180]
MSMEG_1183	2.63067	1.19493e-08	4.20899	1.07982e-09	31	27	18	56	44	29	10.036	12.754	6.728	41.963	35.092	19.574	K01745 histidine ammonia-lyase [EC:4.3.1.3]
MSMEG_0279	1.91989	1.20083e-08	5.10248	1.08704e-09	92	49	65	71	70	64	29.783	23.146	24.297	53.204	55.829	43.198	amino acid permease
MSMEG_5938	2.14495	1.21577e-08	8.11316	1.10247e-09	849	508	665	774	799	776	274.845	239.965	248.579	579.995	637.245	523.779	hypothetical protein
MSMEG_2937	-2.6638	1.22531e-08	5.22019	1.11405e-09	286	165	204	7	8	11	92.586	77.941	76.256	5.245	6.38	7.425	K06215 pyridoxal 5'-phosphate synthase pdxS subunit [EC:4.3.3.6]
MSMEG_0414	2.2918	1.22897e-08	4.33848	1.12222e-09	39	32	36	59	57	31	12.625	15.116	13.457	44.211	45.461	20.924	oxidoreductase, 2OG-Fe(II) oxygenase family protein
MSMEG_2519	-1.66843	1.22897e-08	6.49952	1.12121e-09	482	300	425	28	34	37	156.037	141.712	158.866	20.982	27.117	24.974	K02967 small subunit ribosomal protein S2
MSMEG_4729	-5.30842	1.22897e-08	3.54215	1.12408e-09	387	241	324	1	2	2	125.283	113.842	121.112	0.749	1.595	1.35	conserved hypothetical protein
MSMEG_1476	1.59134	1.27184e-08	8.3952	1.16728e-09	646	508	517	571	471	333	209.128	239.965	193.256	427.877	375.648	224.766	K04773 protease IV [EC:3.4.21.-]
MSMEG_0976	1.7592	1.34169e-08	6.57139	1.2356e-09	143	97	128	138	121	81	46.293	45.82	47.847	103.41	96.504	54.673	conserved hypothetical protein
MSMEG_1491	2.01887	1.41022e-08	4.53955	1.30314e-09	45	39	57	52	47	52	14.568	18.423	21.307	38.966	37.485	35.099	K00817 histidinol-phosphate aminotransferase [EC:2.6.1.9]
MSMEG_3187	-2.82759	1.44457e-08	5.19605	1.33714e-09	177	174	218	6	6	8	57.3	82.193	81.489	4.496	4.785	5.4	putative acyltransferase domain protein
MSMEG_3793	-1.75718	1.44954e-08	6.56886	1.34402e-09	762	520	677	31	53	77	246.681	245.633	253.064	23.23	42.27	51.973	K02520 translation initiation factor IF-3
MSMEG_4560	-2.08518	1.47143e-08	6.68678	1.36663e-09	503	361	340	16	29	31	162.835	170.526	127.093	11.99	23.129	20.924	K02016 iron complex transport system substrate-binding protein
MSMEG_2704	3.4764	1.48899e-08	4.15677	1.38527e-09	41	20	17	34	89	129	13.273	9.447	6.355	25.478	70.982	87.072	pseudogene
MSMEG_6127	-2.7966	1.49098e-08	6.60097	1.38946e-09	292	217	293	12	7	11	94.529	102.505	109.524	8.992	5.583	7.425	anti-anti-sigma factor
MSMEG_1178	3.11178	1.50927e-08	4.96347	1.41124e-09	64	61	57	275	140	73	20.719	28.815	21.307	206.07	111.657	49.273	transcriptional regulator
MSMEG_1466	-3.85194	1.51522e-08	3.90135	1.41918e-09	122	126	136	1	2	3	39.495	59.519	50.837	0.749	1.595	2.025	K02895 large subunit ribosomal protein L24
MSMEG_3941	-1.78195	1.5235e-08	6.44256	1.42933e-09	753	649	900	49	57	72	243.767	306.569	336.422	36.718	45.461	48.598	K07682 two-component system, NarL family, sensor histidine kinase DevS [EC:2.7.13.3]
MSMEG_4241	-2.23119	1.58169e-08	5.04399	1.4864e-09	199	153	166	9	9	10	64.422	72.273	62.051	6.744	7.178	6.75	K14337 alpha-1,6-mannosyltransferase [EC:2.4.1.-]
MSMEG_3855	1.74651	1.58506e-08	4.99103	1.49205e-09	82	64	88	80	73	58	26.546	30.232	32.895	59.948	58.221	39.148	hypothetical protein
MSMEG_2188	-2.13703	1.59736e-08	5.92693	1.50614e-09	537	446	497	17	29	50	173.842	210.678	185.78	12.739	23.129	33.749	integral membrane protein
MSMEG_3006	2.78255	1.63584e-08	2.53768	1.54756e-09	16	10	15	22	22	33	5.18	4.724	5.607	16.486	17.546	22.274	Fe-dependent alcohol dehydrogenase
MSMEG_3140	-2.80985	1.64397e-08	5.22322	1.55797e-09	195	174	181	4	6	11	63.127	82.193	67.658	2.997	4.785	7.425	ABC transporter ATP-binding protein, possibly in EF-3 subfamily protein
MSMEG_5796	1.92871	1.64397e-08	7.7307	1.5604e-09	434	374	346	587	386	264	140.498	176.667	129.336	439.867	307.855	178.193	K06980 tRNA-modifying protein YgfZ
MSMEG_2274	2.08828	1.69644e-08	4.19371	1.61553e-09	55	36	36	43	49	51	17.805	17.005	13.457	32.222	39.08	34.424	K04653 hydrogenase expression/formation protein HypC
MSMEG_3707	2.97772	1.71416e-08	3.35524	1.64316e-09	29	38	36	103	53	67	9.388	17.95	13.457	77.183	42.27	45.223	conserved hypothetical protein
MSMEG_5210	1.60501	1.71483e-08	5.44019	1.64649e-09	91	69	67	64	65	55	29.459	32.594	25.045	47.958	51.841	37.124	hydrolase
MSMEG_2742	-1.68804	1.72454e-08	4.40166	1.65951e-09	315	242	257	20	22	24	101.974	114.314	96.067	14.987	17.546	16.199	DNA-damage-inducible protein
MSMEG_6904	-1.87731	1.76903e-08	5.74389	1.70686e-09	1060	612	894	39	60	92	343.152	289.092	334.18	29.225	47.853	62.098	K01858 myo-inositol-1-phosphate synthase [EC:5.5.1.4]
MSMEG_1181	3.68327	1.80748e-08	2.59101	1.74679e-09	8	5	7	29	30	16	2.59	2.362	2.617	21.731	23.927	10.8	hutF; formiminoglutamate deiminase
MSMEG_3007	2.07534	1.81171e-08	3.63174	1.75373e-09	49	27	35	31	40	55	15.863	12.754	13.083	23.23	31.902	37.124	K00135 succinate-semialdehyde dehydrogenase / glutarate-semialdehyde dehydrogenase [EC:1.2.1.16]
MSMEG_2723	-2.37593	1.81188e-08	5.65476	1.75673e-09	542	350	469	12	28	33	175.461	165.33	175.313	8.992	22.331	22.274	K03553 recombination protein RecA
MSMEG_3858	-1.99185	1.81684e-08	6.58174	1.76439e-09	424	269	350	16	20	35	137.261	127.068	130.831	11.99	15.951	23.624	conserved hypothetical protein
MSMEG_1213	1.65683	1.82849e-08	5.74596	1.78025e-09	171	131	173	110	117	180	55.358	61.881	64.668	82.428	93.314	121.495	K24241 cytochrome P450 family 135 [EC:1.14.-.-]
MSMEG_1364	-3.05218	1.82849e-08	5.29488	1.78144e-09	352	197	254	4	12	10	113.952	93.057	94.946	2.997	9.571	6.75	K02864 large subunit ribosomal protein L10
MSMEG_4324	1.85363	1.87138e-08	6.44381	1.82617e-09	123	81	108	137	87	84	39.819	38.262	40.371	102.661	69.387	56.698	conserved hypothetical protein
MSMEG_6256	-2.60808	1.88947e-08	5.57646	1.84678e-09	300	209	264	9	9	15	97.118	98.726	98.684	6.744	7.178	10.125	K00133 aspartate-semialdehyde dehydrogenase [EC:1.2.1.11]
MSMEG_0913	-3.9644	1.90329e-08	4.16167	1.86328e-09	126	96	166	1	1	4	40.79	45.348	62.051	0.749	0.798	2.7	K26590 mycolic acid methyltransferase UmaA [EC:2.1.1.-]
MSMEG_5415	-2.25755	1.94404e-08	5.66481	1.90622e-09	278	216	247	7	19	17	89.996	102.032	92.329	5.245	15.154	11.475	K01689 enolase 1/2/3 [EC:4.2.1.11]
MSMEG_1744	-3.89907	1.98489e-08	4.96316	1.94939e-09	368	313	391	2	6	15	119.132	147.852	146.157	1.499	4.785	10.125	hypothetical protein
MSMEG_0550	-3.18972	1.99211e-08	4.53476	1.96586e-09	148	118	125	6	3	2	47.912	55.74	46.725	4.496	2.393	1.35	K15553 sulfonate transport system substrate-binding protein
MSMEG_1132	1.63112	1.99211e-08	7.39548	1.96292e-09	301	237	290	206	243	236	97.442	111.952	108.403	154.366	193.805	159.294	K21401 menaquinone-9 beta-reductase [EC:1.3.99.38]
MSMEG_3149	-2.44931	1.99211e-08	5.22644	1.96027e-09	183	137	178	7	9	7	59.242	64.715	66.537	5.245	7.178	4.725	K07114 Ca-activated chloride channel homolog
MSMEG_0062	-2.52823	2.10196e-08	5.81364	2.08085e-09	559	439	531	13	26	35	180.964	207.371	198.489	9.742	20.736	23.624	K27086 ESX secretion system protein EccC
MSMEG_5986	2.89494	2.1431e-08	2.92981	2.1283e-09	12	8	7	18	22	15	3.885	3.779	2.617	13.488	17.546	10.125	K00820 glutamine---fructose-6-phosphate transaminase (isomerizing) [EC:2.6.1.16]
MSMEG_6740	2.04986	2.14338e-08	5.53044	2.13195e-09	45	30	40	33	45	50	14.568	14.171	14.952	24.728	35.89	33.749	K01505 1-aminocyclopropane-1-carboxylate deaminase [EC:3.5.99.7]
MSMEG_4681	2.03484	2.21855e-08	6.74701	2.21368e-09	195	142	131	254	167	115	63.127	67.077	48.968	190.334	133.191	77.622	conserved hypothetical protein
MSMEG_5899	-3.62473	2.21855e-08	3.87711	2.21298e-09	150	106	126	2	1	5	48.559	50.071	47.099	1.499	0.798	3.375	K02067 phospholipid/cholesterol/gamma-HCH transport system substrate-binding protein
MSMEG_2717	4.92369	2.23011e-08	2.42476	2.22871e-09	17	10	7	43	114	148	5.503	4.724	2.617	32.222	90.921	99.896	conserved hypothetical protein
MSMEG_4356	1.91068	2.26103e-08	7.16316	2.26315e-09	367	291	349	185	414	495	118.808	137.46	130.457	138.629	330.187	334.112	K02034 peptide/nickel transport system permease protein
MSMEG_5568	2.83134	2.26758e-08	3.28384	2.27328e-09	14	13	15	35	30	19	4.532	6.141	5.607	26.227	23.927	12.824	clavaldehyde dehydrogenase
MSMEG_3022	1.97409	2.27704e-08	6.33174	2.28632e-09	213	154	226	170	287	178	68.954	72.745	84.479	127.389	228.898	120.145	transglycosylase associated protein
MSMEG_3171	1.59138	2.34974e-08	4.94755	2.37038e-09	108	66	74	62	63	72	34.963	31.177	27.661	46.46	50.246	48.598	conserved hypothetical protein
MSMEG_5088	1.73559	2.42013e-08	6.07768	2.44899e-09	199	147	132	186	145	103	64.422	69.439	49.342	139.379	115.645	69.522	tetratricopeptide repeat family protein
MSMEG_1762	1.74728	2.62716e-08	6.32577	2.66261e-09	127	89	84	82	91	93	41.113	42.041	31.399	61.446	72.577	62.773	K26061 L-aminoadipate-semialdehyde dehydrogenase
MSMEG_1127	2.41516	2.78244e-08	3.15659	2.83745e-09	21	18	15	27	25	25	6.798	8.503	5.607	20.232	19.939	16.874	probable conserved transmembrane protein
MSMEG_3846	1.65422	2.79232e-08	3.62896	2.8519e-09	80	47	60	45	59	52	25.898	22.201	22.428	33.721	47.056	35.099	phosphotransferase enzyme family protein
MSMEG_2721	2.98564	2.88765e-08	3.05385	2.9538e-09	19	25	19	34	40	61	6.151	11.809	7.102	25.478	31.902	41.173	K04652 hydrogenase nickel incorporation protein HypB
MSMEG_0430	1.62174	2.88857e-08	8.69384	2.96178e-09	1058	742	933	488	773	1087	342.504	350.5	348.758	365.681	616.509	733.696	K07485 transposase
MSMEG_5284	1.61967	2.88857e-08	5.92113	2.9638e-09	141	92	104	109	94	75	45.646	43.458	38.875	81.679	74.97	50.623	K07001 NTE family protein
MSMEG_6559	2.09913	2.89449e-08	7.54286	2.97751e-09	217	179	188	362	211	146	70.249	84.555	70.275	271.264	168.284	98.546	hypothetical protein
MSMEG_6720	2.11774	2.92647e-08	4.2281	3.01646e-09	32	21	24	30	29	30	10.359	9.92	8.971	22.48	23.129	20.249	epoxide hydrolase
MSMEG_3289	1.73379	3.00928e-08	11.5394	3.10654e-09	15098	10828	11680	10706	11724	10783	4887.65	5114.84	4366.02	8022.51	9350.51	7278.24	gp61 protein
MSMEG_3538	-3.04058	3.10847e-08	5.05628	3.21381e-09	162	120	182	5	6	3	52.444	56.685	68.032	3.747	4.785	2.025	K00574 cyclopropane-fatty-acyl-phospholipid synthase [EC:2.1.1.79]
MSMEG_3326	2.87108	3.14425e-08	4.84478	3.26067e-09	29	23	34	36	65	73	9.388	10.865	12.709	26.976	51.841	49.273	K06048 glutamate---cysteine ligase / carboxylate-amine ligase [EC:6.3.2.2 6.3.-.-]
MSMEG_0924	1.75708	3.16226e-08	5.60789	3.2843e-09	103	60	63	88	61	56	33.344	28.342	23.55	65.943	48.651	37.799	K11206 deaminated glutathione amidase [EC:3.5.1.128]
MSMEG_4915	-1.85831	3.26672e-08	5.95445	3.40305e-09	510	372	410	21	36	39	165.101	175.722	153.259	15.736	28.712	26.324	K00688 glycogen phosphorylase [EC:2.4.1.1]
MSMEG_6648	-2.70953	3.28832e-08	4.11154	3.43071e-09	208	136	172	5	9	6	67.335	64.243	64.294	3.747	7.178	4.05	K01958 pyruvate carboxylase [EC:6.4.1.1]
MSMEG_4261	-1.93503	3.29237e-08	5.50942	3.4401e-09	292	211	221	12	16	22	94.529	99.67	82.61	8.992	12.761	14.849	K03889 quinol---cytochrome-c reductase cytochrome c subunit [EC:7.1.1.8]
MSMEG_5020	2.28047	3.31324e-08	4.34196	3.46711e-09	73	48	45	47	79	94	23.632	22.674	16.821	35.219	63.007	63.447	K03366 meso-butanediol dehydrogenase / (S,S)-butanediol dehydrogenase / diacetyl reductase
MSMEG_1788	2.16815	3.33174e-08	10.3318	3.49169e-09	3849	3014	3516	4661	4494	3408	1246.03	1423.73	1314.29	3492.71	3584.2	2300.31	conserved hypothetical protein
MSMEG_0684	1.58899	3.3343e-08	10.7682	3.4996e-09	5882	4386	4771	2732	4338	5437	1904.17	2071.82	1783.41	2047.22	3459.78	3669.83	K11177 xanthine dehydrogenase YagR molybdenum-binding subunit [EC:1.17.1.4]
MSMEG_1414	2.63857	3.41496e-08	3.3787	3.59498e-09	24	20	19	43	34	30	7.769	9.447	7.102	32.222	27.117	20.249	Amidinotransferase
MSMEG_5835	-1.88106	3.4932e-08	4.95553	3.68282e-09	218	167	195	16	12	13	70.573	78.886	72.892	11.99	9.571	8.775	K07077 uncharacterized protein
MSMEG_1743	-1.86263	3.58058e-08	7.21133	3.78618e-09	1939	1297	1573	78	138	144	627.709	612.666	587.992	58.449	110.062	97.196	K22769 NADPH-dependent stearoyl-CoA 9-desaturase [EC:1.14.19.-]
MSMEG_1439	-3.03508	3.66719e-08	4.62497	3.88927e-09	209	120	148	4	8	3	67.659	56.685	55.323	2.997	6.38	2.025	K02886 large subunit ribosomal protein L2
MSMEG_1465	-4.19677	3.68708e-08	4.54295	3.92503e-09	226	218	263	1	3	7	73.163	102.977	98.31	0.749	2.393	4.725	K02874 large subunit ribosomal protein L14
MSMEG_5216	-2.68205	3.68708e-08	4.48135	3.92772e-09	278	180	241	5	9	16	89.996	85.027	90.086	3.747	7.178	10.8	glyoxalase family protein
MSMEG_4559	-3.1555	3.71104e-08	5.64772	3.95906e-09	269	161	164	3	6	8	87.083	76.052	61.304	2.248	4.785	5.4	K02015 iron complex transport system permease protein
MSMEG_0222	-3.21545	3.7578e-08	4.27752	4.02074e-09	121	84	88	2	2	3	39.171	39.679	32.895	1.499	1.595	2.025	conserved hypothetical protein
MSMEG_5639	1.74748	3.7578e-08	7.73518	4.01752e-09	462	365	355	498	384	229	149.562	172.416	132.7	373.175	306.26	154.569	enoyl-CoA hydratase
MSMEG_3222	-1.60314	3.76956e-08	6.76833	4.04515e-09	623	485	479	55	56	32	201.683	229.1	179.051	41.214	44.663	21.599	K13292 phosphatidylglycerol---prolipoprotein diacylglyceryl transferase [EC:2.5.1.145]
MSMEG_5771	-2.87514	3.76956e-08	5.0181	4.04259e-09	203	215	237	5	9	9	65.717	101.56	88.591	3.747	7.178	6.075	hypothetical protein
MSMEG_0370	-1.79122	3.78244e-08	6.0807	4.06491e-09	383	244	316	16	32	25	123.988	115.259	118.122	11.99	25.522	16.874	conserved hypothetical protein
MSMEG_1582	-4.45548	3.82759e-08	4.09952	4.11943e-09	440	249	320	1	2	16	142.44	117.621	119.617	0.749	1.595	10.8	K04078 chaperonin GroES
MSMEG_2596	1.97971	3.83312e-08	5.10172	4.14161e-09	43	34	37	30	41	51	13.92	16.061	13.831	22.48	32.7	34.424	K07010 putative glutamine amidotransferase
MSMEG_6894	-1.98997	3.9176e-08	5.81788	4.24089e-09	270	182	210	10	19	15	87.407	85.972	78.499	7.493	15.154	10.125	K02939 large subunit ribosomal protein L9
MSMEG_4492	2.05908	4.01524e-08	5.76674	4.35289e-09	94	77	71	130	95	59	30.43	36.373	26.54	97.415	75.768	39.823	K01426 amidase [EC:3.5.1.4]
MSMEG_2850	-3.95782	4.07063e-08	3.00898	4.42571e-09	88	58	68	1	2	0	28.488	27.398	25.419	0.749	1.595	0	mycobacterial family protein 11 protein
MSMEG_5894	-2.75809	4.12853e-08	4.32254	4.49513e-09	161	116	141	5	5	5	52.12	54.795	52.706	3.747	3.988	3.375	K18481 Mce-associated membrane protein
MSMEG_5122	-2.42748	4.13098e-08	5.10383	4.50429e-09	268	178	272	8	16	11	86.759	84.082	101.674	5.995	12.761	7.425	ferredoxin
MSMEG_0879	-4.43024	4.23098e-08	2.15991	4.63473e-09	92	79	81	0	1	1	29.783	37.317	30.278	0	0.798	0.675	hypothetical protein
MSMEG_4562	2.35871	4.23098e-08	4.78111	4.63331e-09	44	32	38	31	77	58	14.244	15.116	14.205	23.23	61.412	39.148	pseudogene
MSMEG_5218	2.00755	4.32329e-08	4.74602	4.74788e-09	47	42	53	54	59	41	15.215	19.84	19.812	40.465	47.056	27.674	conserved hypothetical protein
MSMEG_1520	-2.19882	4.32809e-08	5.77003	4.75995e-09	347	214	323	10	17	25	112.334	101.088	120.738	7.493	13.558	16.874	K02919 large subunit ribosomal protein L36
MSMEG_4359	2.02515	4.40092e-08	4.03057	4.84695e-09	32	23	36	31	34	33	10.359	10.865	13.457	23.23	27.117	22.274	hypothetical protein
MSMEG_3249	-2.00978	4.50549e-08	5.72359	4.97625e-09	326	256	290	17	23	17	105.535	120.927	108.403	12.739	18.344	11.475	K01998 branched-chain amino acid transport system permease protein
MSMEG_4656	2.46818	4.54672e-08	3.85505	5.02892e-09	65	41	38	39	85	100	21.042	19.367	14.205	29.225	67.792	67.497	K02056 simple sugar transport system ATP-binding protein [EC:7.5.2.-]
MSMEG_1556	-3.58188	4.56984e-08	5.20762	5.06167e-09	283	135	230	6	4	3	91.615	63.77	85.975	4.496	3.19	2.025	K02871 large subunit ribosomal protein L13
MSMEG_3623	-3.99613	4.59797e-08	3.1207	5.10004e-09	86	68	67	1	0	2	27.841	32.121	25.045	0.749	0	1.35	K03189 urease accessory protein
MSMEG_5248	-2.92016	4.64027e-08	4.87736	5.15424e-09	216	134	187	8	6	4	69.925	63.298	69.901	5.995	4.785	2.7	K03922 acyl-[acyl-carrier-protein] desaturase [EC:1.14.19.2]
MSMEG_3251	-2.7394	4.76691e-08	4.86417	5.30238e-09	217	148	172	9	4	8	70.249	69.911	64.294	6.744	3.19	5.4	K01996 branched-chain amino acid transport system ATP-binding protein
MSMEG_2599	2.41782	5.04269e-08	5.47117	5.62497e-09	53	45	36	45	53	103	17.158	21.257	13.457	33.721	42.27	69.522	GntR-family protein transcriptional regulator
MSMEG_1901	1.64268	5.06556e-08	5.0668	5.65843e-09	112	94	83	60	93	90	36.258	44.403	31.026	44.961	74.172	60.748	DNA-binding HTH domain containing protein, putative
MSMEG_4329	-1.59343	5.24595e-08	8.62829	5.87638e-09	2717	1915	2253	179	198	230	879.57	904.592	842.178	134.133	157.916	155.244	K18472 acetyl-CoA/propionyl-CoA carboxylase carboxyl transferase subunit [EC:6.4.1.2 6.4.1.3]
MSMEG_5914	2.00086	5.36e-08	3.885	6.01255e-09	41	29	40	35	35	48	13.273	13.699	14.952	26.227	27.914	32.399	K18688 3-oxocholest-4-en-26-oate---CoA ligase [EC:6.2.1.42]
MSMEG_2488	1.86367	5.36419e-08	4.46384	6.03408e-09	86	49	56	75	68	45	27.841	23.146	20.933	56.201	54.234	30.374	K00135 succinate-semialdehyde dehydrogenase / glutarate-semialdehyde dehydrogenase [EC:1.2.1.16]
MSMEG_6174	2.56892	5.39359e-08	3.7243	6.07562e-09	23	8	26	27	34	24	7.446	3.779	9.719	20.232	27.117	16.199	transcriptional regulator, IclR family protein
MSMEG_3831	-2.80723	5.52855e-08	4.39725	6.24499e-09	158	171	154	6	5	6	51.149	80.776	57.566	4.496	3.988	4.05	pseudogene
MSMEG_4561	-2.28971	5.84101e-08	5.93077	6.60711e-09	201	153	217	6	11	14	65.069	72.273	81.115	4.496	8.773	9.45	K02016 iron complex transport system substrate-binding protein
MSMEG_6665	2.08064	5.87416e-08	9.60361	6.65382e-09	1911	1444	1566	1462	1974	2180	618.645	682.105	585.375	1095.55	1574.37	1471.44	integral membrane protein
MSMEG_4950	-3.83159	5.88186e-08	4.08003	6.681e-09	142	120	108	1	5	1	45.969	56.685	40.371	0.749	3.988	0.675	K02835 peptide chain release factor 1
MSMEG_1433	-2.91752	5.94088e-08	5.21781	6.75736e-09	174	139	199	7	6	4	56.329	65.66	74.387	5.245	4.785	2.7	thioesterase
MSMEG_5119	2.17378	5.94369e-08	6.55289	6.76988e-09	200	166	163	271	226	157	64.746	78.414	60.93	203.073	180.247	105.971	K00294 1-pyrroline-5-carboxylate dehydrogenase [EC:1.2.1.88]
MSMEG_6363	-2.27575	5.94403e-08	5.43026	6.78624e-09	230	182	225	7	14	14	74.457	85.972	84.106	5.245	11.166	9.45	cysteine desulfurase family protein
MSMEG_0020	-4.45564	6.05003e-08	2.78262	6.92897e-09	141	67	105	0	2	1	45.646	31.649	39.249	0	1.595	0.675	K25286 iron-siderophore transport system substrate-binding protein
MSMEG_1974	1.97676	6.05003e-08	2.68273	6.92884e-09	98	62	87	53	94	124	31.725	29.287	32.521	39.715	74.97	83.697	K18226 propane monooxygenase coupling protein
MSMEG_1130	2.11149	6.13602e-08	6.58582	7.03708e-09	103	93	104	114	115	117	33.344	43.931	38.875	85.426	91.719	78.972	hypothetical protein
MSMEG_2032	2.09484	6.32895e-08	5.26252	7.26826e-09	65	44	41	77	58	41	21.042	20.784	15.326	57.7	46.258	27.674	K06997 PLP dependent protein
MSMEG_5896	-2.47953	6.3876e-08	4.44177	7.34564e-09	206	174	189	8	6	13	66.688	82.193	70.649	5.995	4.785	8.775	K02067 phospholipid/cholesterol/gamma-HCH transport system substrate-binding protein
MSMEG_1749	-3.95478	6.45217e-08	3.03577	7.44014e-09	213	150	173	1	2	7	68.954	70.856	64.668	0.749	1.595	4.725	putative monooxygenase
MSMEG_0076	-1.77268	6.63604e-08	5.60706	7.66622e-09	420	277	304	24	25	27	135.966	130.847	113.636	17.984	19.939	18.224	K27099 ESX secretion-associated protein EspB
MSMEG_1315	1.94124	6.63604e-08	7.01691	7.67299e-09	472	363	353	438	445	339	152.8	171.471	131.952	328.214	354.911	228.816	K22044 moderate conductance mechanosensitive channel
MSMEG_5849	1.81262	6.70078e-08	6.25361	7.75835e-09	171	118	139	192	152	82	55.358	55.74	51.959	143.875	121.228	55.348	conserved hypothetical protein
MSMEG_6917	-2.32513	6.76671e-08	6.08773	7.8453e-09	291	198	251	15	15	9	94.205	93.53	93.824	11.24	11.963	6.075	K01869 leucyl-tRNA synthetase [EC:6.1.1.4]
MSMEG_4652	2.01388	6.77615e-08	5.6751	7.86688e-09	104	62	79	84	95	83	33.668	29.287	29.53	62.945	75.768	56.023	D-oliose 4-ketoreductase
MSMEG_3150	-3.46913	6.82117e-08	4.69881	7.94055e-09	147	100	136	1	2	7	47.588	47.237	50.837	0.749	1.595	4.725	K11610 beta-ketoacyl ACP reductase [EC:1.1.1.100]
MSMEG_6288	-2.69401	6.83515e-08	5.78157	7.96755e-09	193	177	233	7	6	11	62.48	83.61	87.096	5.245	4.785	7.425	conserved hypothetical protein
MSMEG_3151	-2.62013	6.8388e-08	4.59503	7.98254e-09	135	111	120	7	4	4	43.703	52.433	44.856	5.245	3.19	2.7	K11611 meromycolic acid enoyl-[acyl-carrier-protein] reductase [EC:1.3.1.118]
MSMEG_6946	-2.93917	7.0322e-08	4.99125	8.23034e-09	165	144	159	5	8	3	53.415	68.022	59.435	3.747	6.38	2.025	K02914 large subunit ribosomal protein L34
MSMEG_5904	2.04692	7.64409e-08	4.12644	8.99445e-09	60	29	46	37	67	46	19.424	13.699	17.195	27.726	53.436	31.049	K05337 ferredoxin
MSMEG_1915	-1.82028	7.75382e-08	5.70381	9.1479e-09	358	285	288	17	27	26	115.895	134.626	107.655	12.739	21.534	17.549	anti-sigma factor, family protein
MSMEG_4920	-2.08392	7.89059e-08	6.20625	9.33403e-09	274	208	268	18	20	10	88.702	98.253	100.179	13.488	15.951	6.75	K00626 acetyl-CoA C-acetyltransferase [EC:2.3.1.9]
MSMEG_2963	-2.82802	7.95509e-08	4.63152	9.46024e-09	178	125	137	3	5	8	57.624	59.046	51.211	2.248	3.988	5.4	K02035 peptide/nickel transport system substrate-binding protein
MSMEG_6286	-3.96131	7.95509e-08	4.07256	9.44648e-09	74	50	94	2	1	0	23.956	23.619	35.137	1.499	0.798	0	aspartate transaminase
MSMEG_0846	-1.89672	8.00511e-08	5.27348	9.53229e-09	261	205	222	21	18	11	84.493	96.836	82.984	15.736	14.356	7.425	K05568 multicomponent Na+:H+ antiporter subunit D
MSMEG_6942	-2.27122	8.06284e-08	5.23001	9.61368e-09	201	129	174	10	6	11	65.069	60.936	65.042	7.493	4.785	7.425	K03217 YidC/Oxa1 family membrane protein insertase
MSMEG_5616	-4.70877	8.1038e-08	3.71161	9.67523e-09	191	190	238	2	2	1	61.832	89.751	88.965	1.499	1.595	0.675	K06996 uncharacterized protein
MSMEG_3926	-3.31211	8.23658e-08	4.64279	9.84668e-09	257	184	298	4	9	6	83.198	86.916	111.393	2.997	7.178	4.05	cation-transporting ATPase Pma1
MSMEG_1468	-2.94989	8.40828e-08	3.91175	1.00915e-08	164	120	129	2	6	6	53.091	56.685	48.221	1.499	4.785	4.05	K02954 small subunit ribosomal protein S14
MSMEG_2463	1.64364	8.40828e-08	3.76094	1.00878e-08	71	55	57	47	45	61	22.985	25.98	21.307	35.219	35.89	41.173	K03519 aerobic carbon-monoxide dehydrogenase medium subunit [EC:1.2.5.3]
MSMEG_6787	1.70068	8.54853e-08	8.15572	1.02733e-08	1131	758	818	644	841	857	366.137	358.058	305.771	482.58	670.742	578.452	K01808 ribose 5-phosphate isomerase B [EC:5.3.1.6]
MSMEG_1351	-4.45911	8.71353e-08	2.86733	1.04852e-08	81	61	97	0	0	3	26.222	28.815	36.259	0	0	2.025	K26595 cyclopropane mycolic acid synthase MmaA2
MSMEG_4954	-1.92072	8.79743e-08	6.2105	1.06414e-08	361	253	338	12	25	33	116.866	119.51	126.345	8.992	19.939	22.274	K03628 transcription termination factor Rho
MSMEG_0001	-1.67585	8.84885e-08	6.13664	1.07314e-08	312	251	253	16	25	27	101.003	118.565	94.572	11.99	19.939	18.224	K02338 DNA polymerase III subunit beta [EC:2.7.7.7]
MSMEG_6276	-2.17852	8.84885e-08	5.3105	1.07191e-08	180	139	157	7	11	9	58.271	65.66	58.687	5.245	8.773	6.075	K23393 lipid II isoglutaminyl synthase (glutamine-hydrolysing) [EC:6.3.5.13]
MSMEG_0024	-2.53556	8.98463e-08	5.63257	1.09101e-08	197	148	214	13	5	8	63.774	69.911	79.994	9.742	3.988	5.4	K03767 peptidyl-prolyl cis-trans isomerase A (cyclophilin A) [EC:5.2.1.8]
MSMEG_1911	3.06891	9.10859e-08	2.24291	1.10892e-08	8	6	8	9	20	26	2.59	2.834	2.99	6.744	15.951	17.549	K03381 catechol 1,2-dioxygenase [EC:1.13.11.1]
MSMEG_3781	2.24086	9.1973e-08	2.92191	1.12116e-08	21	15	22	35	20	21	6.798	7.086	8.224	26.227	15.951	14.174	conserved hypothetical protein
MSMEG_3619	-1.88103	1.00112e-07	6.5439	1.22509e-08	544	374	478	25	30	47	176.108	176.667	178.678	18.734	23.927	31.724	short chain dehydrogenase
MSMEG_4919	-3.23952	1.01967e-07	3.64459	1.24939e-08	78	67	77	2	2	1	25.251	31.649	28.783	1.499	1.595	0.675	conserved hypothetical protein
MSMEG_5734	-3.10556	1.02692e-07	3.90971	1.2615e-08	122	108	99	3	2	4	39.495	51.016	37.006	2.248	1.595	2.7	K01796 alpha-methylacyl-CoA racemase [EC:5.1.99.4]
MSMEG_1006	1.67088	1.04652e-07	4.97904	1.28722e-08	83	80	86	74	75	63	26.869	37.79	32.147	55.452	59.816	42.523	aminoglycoside phosphotransferase
MSMEG_3133	1.71954	1.06468e-07	3.10529	1.31123e-08	42	45	48	40	34	44	13.597	21.257	17.943	29.974	27.117	29.699	hypothetical protein
MSMEG_2780	1.62586	1.09001e-07	5.33991	1.34413e-08	83	56	56	43	58	59	26.869	26.453	20.933	32.222	46.258	39.823	K01599 uroporphyrinogen decarboxylase [EC:4.1.1.37]
MSMEG_5996	2.16644	1.12038e-07	3.75468	1.3851e-08	26	16	25	26	29	25	8.417	7.558	9.345	19.483	23.129	16.874	K00626 acetyl-CoA C-acetyltransferase [EC:2.3.1.9]
MSMEG_1469	-3.238	1.15075e-07	5.00892	1.42625e-08	332	227	293	2	14	13	107.478	107.228	109.524	1.499	11.166	8.775	K02994 small subunit ribosomal protein S8
MSMEG_0546	-3.97761	1.21588e-07	2.6399	1.50986e-08	76	76	90	3	1	0	24.603	35.9	33.642	2.248	0.798	0	conserved hypothetical protein
MSMEG_5798	-1.71931	1.21588e-07	6.00057	1.51078e-08	281	227	301	17	30	19	90.968	107.228	112.515	12.739	23.927	12.824	K01933 phosphoribosylformylglycinamidine cyclo-ligase [EC:6.3.3.1]
MSMEG_6307	-3.23714	1.23661e-07	3.92137	1.54187e-08	120	96	129	3	1	6	38.847	45.348	48.221	2.248	0.798	4.05	K02424 L-cystine transport system substrate-binding protein K10009 L-cystine transport system permease
MSMEG_6761	1.59671	1.23675e-07	9.57879	1.54449e-08	236	198	216	191	134	209	76.4	93.53	80.741	143.125	106.872	141.069	K00111 glycerol-3-phosphate dehydrogenase [EC:1.1.5.3]
MSMEG_2068	2.08452	1.26569e-07	3.81707	1.5846e-08	39	22	26	45	31	25	12.625	10.392	9.719	33.721	24.724	16.874	hypothetical protein
MSMEG_3117	-3.28999	1.30337e-07	3.23905	1.63381e-08	133	82	104	1	3	4	43.056	38.734	38.875	0.749	2.393	2.7	K02259 heme a synthase [EC:1.17.99.9]
MSMEG_0113	-4.02834	1.31236e-07	2.5808	1.64715e-08	52	57	48	0	2	0	16.834	26.925	17.943	0	1.595	0	K15552 taurine transport system permease protein
MSMEG_2374	-1.72184	1.32373e-07	6.38044	1.66349e-08	446	293	418	23	30	40	144.383	138.405	156.25	17.235	23.927	26.999	K00053 ketol-acid reductoisomerase [EC:1.1.1.86]
MSMEG_5505	1.92568	1.37116e-07	4.64062	1.72739e-08	24	21	34	23	24	32	7.769	9.92	12.709	17.235	19.141	21.599	conserved hypothetical protein
MSMEG_0974	-2.39325	1.38087e-07	4.94041	1.7418e-08	191	151	158	6	12	7	61.832	71.328	59.061	4.496	9.571	4.725	ccsB; cytochrome c-type biogenesis protein CcsB
MSMEG_3213	-2.34084	1.38164e-07	4.86792	1.74493e-08	251	213	236	8	9	22	81.256	100.615	88.217	5.995	7.178	14.849	conserved hypothetical protein
MSMEG_4651	2.87486	1.38573e-07	3.47484	1.75227e-08	20	15	23	31	32	54	6.475	7.086	8.597	23.23	25.522	36.449	K03335 inosose dehydratase [EC:4.2.1.44]
MSMEG_1935	-2.4374	1.40042e-07	5.69512	1.77305e-08	189	174	242	7	13	9	61.185	82.193	90.46	5.245	10.368	6.075	TetR-family protein transcriptional regulator
MSMEG_1978	2.2066	1.41584e-07	9.13849	1.79479e-08	7583	5035	5711	3767	8893	12320	2454.83	2378.39	2134.79	2822.79	7092.64	8315.67	K04077 chaperonin GroEL [EC:5.6.1.7]
MSMEG_0006	-1.89717	1.44559e-07	6.95454	1.8393e-08	631	436	546	21	51	49	204.273	205.954	204.096	15.736	40.675	33.074	K02469 DNA gyrase subunit A [EC:5.6.2.2]
MSMEG_0749	2.73682	1.45597e-07	2.74265	1.8548e-08	29	21	22	27	54	53	9.388	9.92	8.224	20.232	43.068	35.774	carbon monoxide dehydrogenase subunit G (CoxG) family protein
MSMEG_0061	-1.83625	1.46124e-07	5.38134	1.8661e-08	532	365	428	21	34	46	172.223	172.416	159.988	15.736	27.117	31.049	K27086 ESX secretion system protein EccC
MSMEG_3051	-2.74768	1.49971e-07	4.51367	1.92229e-08	110	101	96	3	3	5	35.61	47.71	35.885	2.248	2.393	3.375	K00942 guanylate kinase [EC:2.7.4.8]
MSMEG_4557	-2.40182	1.49971e-07	5.61436	1.92147e-08	251	173	166	9	13	7	81.256	81.72	62.051	6.744	10.368	4.725	K02013 iron complex transport system ATP-binding protein [EC:7.2.2.-]
MSMEG_6906	-3.03354	1.50531e-07	3.74656	1.93182e-08	117	84	106	4	1	5	37.876	39.679	39.623	2.997	0.798	3.375	putative hydrolase
MSMEG_5672	-1.67219	1.52347e-07	6.13404	1.95752e-08	211	158	196	13	16	17	68.307	74.635	73.265	9.742	12.761	11.475	K01647 citrate synthase [EC:2.3.3.1]
MSMEG_4732	-3.96103	1.55917e-07	2.7546	2.00828e-08	92	52	72	1	2	0	29.783	24.563	26.914	0.749	1.595	0	glycosyl transferase, group 2 family protein, putative
MSMEG_1418	1.72345	1.56364e-07	4.78748	2.01649e-08	121	71	85	99	80	66	39.171	33.538	31.773	74.185	63.804	44.548	K03088 RNA polymerase sigma-70 factor, ECF subfamily
MSMEG_5223	-1.85696	1.58188e-07	6.07666	2.04249e-08	225	180	205	20	9	17	72.839	85.027	76.63	14.987	7.178	11.475	conserved hypothetical protein
MSMEG_5335	1.83187	1.63242e-07	2.64554	2.11031e-08	50	29	32	38	41	27	16.186	13.699	11.962	28.475	32.7	18.224	K01455 formamidase [EC:3.5.1.49]
MSMEG_5117	1.74262	1.64672e-07	5.90485	2.13138e-08	107	109	124	117	118	75	34.639	51.489	46.352	87.674	94.111	50.623	K00318 proline dehydrogenase [EC:1.5.5.2]
MSMEG_0687	-3.64653	1.66701e-07	3.23546	2.16143e-08	53	37	57	0	1	1	17.158	17.478	21.307	0	0.798	0.675	conserved hypothetical protein
MSMEG_1917	-2.23213	1.66701e-07	5.50915	2.16287e-08	188	148	212	8	9	13	60.861	69.911	79.246	5.995	7.178	8.775	K02160 acetyl-CoA carboxylase biotin carboxyl carrier protein
MSMEG_6400	-2.14227	1.67413e-07	4.91328	2.17737e-08	190	136	144	10	8	9	61.508	64.243	53.828	7.493	6.38	6.075	K13687 arabinofuranosyltransferase [EC:2.4.2.-]
MSMEG_2379	-1.591	1.78035e-07	6.55627	2.32948e-08	333	242	333	24	24	31	107.801	114.314	124.476	17.984	19.141	20.924	K00052 3-isopropylmalate dehydrogenase [EC:1.1.1.85]
MSMEG_4742	-2.67048	1.83379e-07	3.79712	2.40516e-08	105	87	97	5	3	3	33.991	41.096	36.259	3.747	2.393	2.025	clavaldehyde dehydrogenase
MSMEG_0406	-1.63217	1.87193e-07	6.73046	2.46105e-08	685	424	485	40	46	48	221.754	200.286	181.294	29.974	36.687	32.399	acyl-coA-dehydrogenase
MSMEG_0686	1.61807	1.93262e-07	7.47643	2.54692e-08	576	440	510	306	461	509	186.467	207.844	190.639	229.3	367.672	343.561	K13483 xanthine dehydrogenase YagT iron-sulfur-binding subunit
MSMEG_0456	-3.41159	1.93582e-07	4.57902	2.55416e-08	170	141	116	1	2	11	55.034	66.604	43.361	0.749	1.595	7.425	K02469 DNA gyrase subunit A [EC:5.6.2.2]
MSMEG_2703	5.71876	1.93991e-07	1.61313	2.5626e-08	1	1	7	13	55	59	0.324	0.472	2.617	9.742	43.865	39.823	K04653 hydrogenase expression/formation protein HypC
MSMEG_0225	-1.77471	1.94225e-07	4.98807	2.56875e-08	208	150	200	13	15	14	67.335	70.856	74.761	9.742	11.963	9.45	K06994 putative drug exporter of the RND superfamily
MSMEG_3883	-2.03901	2.03484e-07	5.07784	2.69759e-08	173	138	188	9	10	12	56.005	65.187	70.275	6.744	7.976	8.1	5'-3' exonuclease
MSMEG_3791	-2.92007	2.09354e-07	3.49736	2.78525e-08	128	78	106	3	2	5	41.437	36.845	39.623	2.248	1.595	3.375	K02887 large subunit ribosomal protein L20
MSMEG_2786	-2.60199	2.09729e-07	5.04045	2.79683e-08	161	137	135	3	8	8	52.12	64.715	50.463	2.248	6.38	5.4	hydrolase, alpha/beta fold family protein
MSMEG_2352	-3.08871	2.1534e-07	5.99473	2.87503e-08	526	345	412	3	20	30	170.281	162.968	154.007	2.248	15.951	20.249	K03522 electron transfer flavoprotein alpha subunit
MSMEG_5322	-2.86756	2.22794e-07	2.35247	2.98503e-08	160	109	120	6	2	6	51.797	51.489	44.856	4.496	1.595	4.05	hypothetical protein
MSMEG_4993	1.94481	2.25704e-07	7.88933	3.02756e-08	722	518	738	415	894	816	233.732	244.689	275.866	310.979	713.012	550.778	hypothetical protein
MSMEG_5591	-1.83417	2.32052e-07	5.55779	3.12363e-08	284	239	280	13	30	19	91.939	112.897	104.665	9.742	23.927	12.824	conserved hypothetical protein
MSMEG_5898	-4.004	2.33256e-07	3.84411	3.14717e-08	173	143	148	1	2	4	56.005	67.549	55.323	0.749	1.595	2.7	K02067 phospholipid/cholesterol/gamma-HCH transport system substrate-binding protein
MSMEG_1264	-3.14665	2.35802e-07	2.85281	3.18522e-08	140	71	121	2	2	5	45.322	33.538	45.23	1.499	1.595	3.375	prophage Lp1 protein 5
MSMEG_4685	-2.91138	2.36544e-07	3.06395	3.19895e-08	84	68	71	1	3	3	27.193	32.121	26.54	0.749	2.393	2.025	oxidoreductase
MSMEG_1287	1.6885	2.36938e-07	4.71174	3.208e-08	85	72	83	97	63	54	27.517	34.011	31.026	72.687	50.246	36.449	cyclase/dehydrase superfamily protein
MSMEG_6901	-1.90552	2.3728e-07	6.30262	3.21634e-08	246	216	247	9	18	26	79.637	102.032	92.329	6.744	14.356	17.549	conserved hypothetical protein
MSMEG_0816	-3.45155	2.42364e-07	2.94272	3.28906e-08	92	81	85	2	1	2	29.783	38.262	31.773	1.499	0.798	1.35	flavin-binding monooxygenase
MSMEG_2067	2.53112	2.4882e-07	2.91742	3.38448e-08	14	12	9	19	26	12	4.532	5.668	3.364	14.238	20.736	8.1	methyltransferase type 12
MSMEG_1750	-3.70961	2.5362e-07	0.0254931	3.45375e-08	28	17	28	0	0	0	9.064	8.03	10.466	0	0	0	hypothetical protein
MSMEG_3868	2.88109	2.57925e-07	1.816	3.52047e-08	17	11	13	16	36	34	5.503	5.196	4.859	11.99	28.712	22.949	conserved hypothetical protein
MSMEG_4888	1.66333	2.65354e-07	4.21922	3.62603e-08	94	45	74	64	56	56	30.43	21.257	27.661	47.958	44.663	37.799	periplasmic binding proteins and sugar binding domain of the LacI family
MSMEG_3005	2.31872	2.73814e-07	3.44112	3.75022e-08	28	28	26	25	31	60	9.064	13.226	9.719	18.734	24.724	40.498	hydroxyacyl-CoA dehydrogenase
MSMEG_0311	-2.55468	2.7809e-07	4.31322	3.81752e-08	133	95	98	3	4	7	43.056	44.875	36.633	2.248	3.19	4.725	glycosyltransferase
MSMEG_1980	2.04911	2.7865e-07	6.81128	3.82957e-08	566	401	525	268	619	976	183.23	189.421	196.246	200.825	493.685	658.774	monooxygenase
MSMEG_0214	1.73851	2.82694e-07	5.29297	3.89403e-08	62	46	71	62	61	39	20.071	21.729	26.54	46.46	48.651	26.324	L-sorbosone dehydrogenase
MSMEG_6401	-2.70921	2.8578e-07	4.82179	3.94998e-08	116	120	130	5	6	3	37.552	56.685	48.594	3.747	4.785	2.025	K14136 decaprenyl-phosphate phosphoribosyltransferase [EC:2.4.2.45]
MSMEG_2026	1.84464	2.905e-07	5.07352	4.02434e-08	57	36	44	63	34	39	18.453	17.005	16.447	47.209	27.117	26.324	short chain dehydrogenase
MSMEG_1039	-2.89835	2.92968e-07	3.63605	4.067e-08	67	40	43	1	1	2	21.69	18.895	16.074	0.749	0.798	1.35	K02016 iron complex transport system substrate-binding protein
MSMEG_4325	-1.87546	2.95989e-07	7.30982	4.11431e-08	1284	1005	1028	85	68	88	415.667	474.734	384.269	63.695	54.234	59.398	K00645 [acyl-carrier-protein] S-malonyltransferase [EC:2.3.1.39]
MSMEG_5731	-2.95638	3.0228e-07	3.3311	4.2065e-08	100	73	99	4	1	4	32.373	34.483	37.006	2.997	0.798	2.7	transcriptional regulator, GntR family protein
MSMEG_1684	-1.78041	3.08575e-07	5.95056	4.29895e-08	279	203	234	11	19	27	90.32	95.891	87.47	8.243	15.154	18.224	conserved hypothetical protein
MSMEG_4189	-1.79137	3.10186e-07	6.50782	4.32625e-08	601	454	469	23	44	55	194.561	214.457	175.313	17.235	35.092	37.124	K15526 L-cysteine:1D-myo-inositol 2-amino-2-deoxy-alpha-D-glucopyranoside ligase [EC:6.3.1.13]
MSMEG_1059	-2.59984	3.22574e-07	4.01196	4.51413e-08	91	78	89	3	4	3	29.459	36.845	33.268	2.248	3.19	2.025	IS1096, tnpA protein
MSMEG_5419	-3.35809	3.22574e-07	3.43886	4.51421e-08	142	82	101	3	2	2	45.969	38.734	37.754	2.248	1.595	1.35	pseudogene
MSMEG_4959	-3.75961	3.25835e-07	3.83658	4.56989e-08	67	43	80	2	0	1	21.69	20.312	29.904	1.499	0	0.675	K01887 arginyl-tRNA synthetase [EC:6.1.1.19]
MSMEG_6251	-2.99971	3.25835e-07	3.42065	4.57007e-08	64	59	65	2	2	1	20.719	27.87	24.297	1.499	1.595	0.675	conserved hypothetical protein
MSMEG_5727	-2.10061	3.2998e-07	4.50591	4.63338e-08	188	140	151	8	15	7	60.861	66.132	56.444	5.995	11.963	4.725	K01477 allantoicase [EC:3.5.3.4]
MSMEG_1236	-2.82627	3.33845e-07	3.42138	4.6929e-08	154	97	106	6	5	2	49.854	45.82	39.623	4.496	3.988	1.35	Mpr protein
MSMEG_4700	-2.12067	3.34142e-07	5.42049	4.70231e-08	242	168	186	11	11	13	78.342	79.358	69.527	8.243	8.773	8.775	ABC-transporter protein, ATP binding component
MSMEG_2591	1.77258	3.43476e-07	5.27376	4.83906e-08	80	60	94	102	71	49	25.898	28.342	35.137	76.433	56.626	33.074	hypothetical protein
MSMEG_1212	-3.28686	3.53227e-07	-0.0881752	4.98197e-08	45	33	35	1	0	1	14.568	15.588	13.083	0.749	0	0.675	hypothetical protein
MSMEG_5791	-3.65738	3.68383e-07	0.667793	5.21886e-08	23	20	27	0	0	0	7.446	9.447	10.093	0	0	0	conserved hypothetical protein
MSMEG_6025	-2.78106	3.69772e-07	3.72761	5.24433e-08	185	153	143	6	3	10	59.89	72.273	53.454	4.496	2.393	6.75	conserved hypothetical protein
MSMEG_3055	-3.11981	3.78165e-07	4.58312	5.38116e-08	122	101	136	4	7	1	39.495	47.71	50.837	2.997	5.583	0.675	K00789 S-adenosylmethionine synthetase [EC:2.5.1.6]
MSMEG_1420	-4.18579	3.85995e-07	2.64027	5.5047e-08	125	106	133	1	1	2	40.466	50.071	49.716	0.749	0.798	1.35	K24699 TetR/AcrR family transcriptional regulator, regulator of mycofactocin system
MSMEG_5816	-1.62094	3.87185e-07	5.56042	5.52774e-08	313	267	323	22	23	33	101.327	126.123	120.738	16.486	18.344	22.274	conserved hypothetical protein
MSMEG_1746	-3.29681	3.95928e-07	0.946045	5.68363e-08	19	15	20	0	0	0	6.151	7.086	7.476	0	0	0	6-hydroxy-D-nicotine oxidase
MSMEG_2440	-3.10032	3.97112e-07	3.07081	5.71931e-08	73	50	82	1	2	2	23.632	23.619	30.652	0.749	1.595	1.35	K02884 large subunit ribosomal protein L19
MSMEG_6185	-2.97583	3.97112e-07	3.49359	5.71554e-08	67	48	72	1	2	2	21.69	22.674	26.914	0.749	1.595	1.35	NTP pyrophosphohydrolase
MSMEG_0945	-1.828	3.99232e-07	6.29989	5.75611e-08	358	275	320	16	28	28	115.895	129.902	119.617	11.99	22.331	18.899	conserved domain protein
MSMEG_4830	1.79617	4.08991e-07	3.08436	5.90965e-08	44	31	38	39	34	32	14.244	14.644	14.205	29.225	27.117	21.599	conserved hypothetical protein
MSMEG_3248	-3.62775	4.1469e-07	3.22253	6.01151e-08	77	51	77	0	2	2	24.927	24.091	28.783	0	1.595	1.35	K01997 branched-chain amino acid transport system permease protein
MSMEG_5900	-4.24598	4.1469e-07	2.90932	6.00672e-08	51	47	55	1	0	0	16.51	22.201	20.559	0.749	0	0	K02067 phospholipid/cholesterol/gamma-HCH transport system substrate-binding protein
MSMEG_1742	-1.72549	4.23977e-07	9.44398	6.15943e-08	8739	6548	8004	535	656	693	2829.06	3093.09	2991.92	400.901	523.195	467.757	K22770 stearoyl-CoA 9-desaturase NADPH oxidoreductase
MSMEG_2961	-1.72405	4.23977e-07	6.24951	6.15826e-08	337	227	312	13	31	29	109.096	107.228	116.626	9.742	24.724	19.574	K03072 preprotein translocase subunit SecD
MSMEG_1975	1.97026	4.30588e-07	5.38959	6.27137e-08	570	377	481	235	620	819	184.525	178.084	179.799	176.097	494.483	552.803	K07045 uncharacterized protein
MSMEG_2483	1.91593	4.30588e-07	3.86089	6.2825e-08	40	26	39	32	35	38	12.949	12.282	14.578	23.979	27.914	25.649	transcriptional regulator, IclR family protein
MSMEG_2306	-2.33612	4.46703e-07	3.54571	6.53866e-08	143	93	112	5	5	7	46.293	43.931	41.866	3.747	3.988	4.725	putative acetyltransferase
MSMEG_5757	-1.66466	4.59479e-07	6.55852	6.73288e-08	282	280	308	29	23	21	91.291	132.264	115.131	21.731	18.344	14.174	K14224 tRNA Glu
MSMEG_6346	-3.64242	4.6807e-07	2.2032	6.8661e-08	37	28	35	1	0	0	11.978	13.226	13.083	0.749	0	0	hypothetical protein
MSMEG_3015	-3.49614	4.76491e-07	4.24457	6.9971e-08	57	56	63	0	1	3	18.453	26.453	23.55	0	0.798	2.025	conserved hypothetical protein
MSMEG_2936	-2.31757	4.81097e-07	4.49551	7.07707e-08	163	129	143	3	12	10	52.768	60.936	53.454	2.248	9.571	6.75	hydrolase, nudix family protein
MSMEG_5345	-2.47318	4.81097e-07	5.27701	7.07985e-08	201	145	178	5	16	6	65.069	68.494	66.537	3.747	12.761	4.05	glycosyl hydrolases family protein 16
MSMEG_2520	-1.96137	4.87931e-07	6.0292	7.18806e-08	363	246	329	13	19	35	117.513	116.203	122.981	9.742	15.154	23.624	K02357 elongation factor Ts
MSMEG_4314	-2.71431	4.89145e-07	4.25174	7.21362e-08	99	98	108	3	4	4	32.049	46.292	40.371	2.248	3.19	2.7	hypothetical protein
MSMEG_4288	1.61139	5.04964e-07	6.52621	7.47068e-08	189	114	178	203	124	86	61.185	53.85	66.537	152.117	98.897	58.048	integral membrane protein
MSMEG_5612	-2.62247	5.04964e-07	4.59472	7.46067e-08	237	176	185	17	8	4	76.724	83.137	69.154	12.739	6.38	2.7	K22479 N-acetyltransferase
MSMEG_1129	3.24364	5.07699e-07	4.11577	7.52806e-08	18	13	13	57	37	26	5.827	6.141	4.859	42.713	29.509	17.549	K00285 D-amino-acid dehydrogenase [EC:1.4.5.1]
MSMEG_4957	-2.133	5.07699e-07	4.78373	7.53504e-08	186	133	133	6	8	13	60.213	62.825	49.716	4.496	6.38	8.775	K00003 homoserine dehydrogenase [EC:1.1.1.3]
MSMEG_2171	1.73436	5.15603e-07	4.41368	7.66852e-08	70	58	63	48	46	80	22.661	27.398	23.55	35.969	36.687	53.998	L-carnitine dehydratase/bile acid-inducible protein F
MSMEG_5395	1.61794	5.18792e-07	4.96735	7.72408e-08	49	54	84	51	56	42	15.863	25.508	31.399	38.217	44.663	28.349	K07646 two-component system, OmpR family, sensor histidine kinase KdpD [EC:2.7.13.3]
MSMEG_0888	1.86895	5.19845e-07	4.25519	7.74793e-08	34	30	27	33	34	23	11.007	14.171	10.093	24.728	27.117	15.524	conserved hypothetical protein
MSMEG_0091	-2.52875	5.22765e-07	4.336	7.81399e-08	122	89	91	7	5	2	39.495	42.041	34.016	5.245	3.988	1.35	putative transcriptional regulator
MSMEG_1128	4.76568	5.22765e-07	0.9715	7.81605e-08	0	0	0	3	2	5	0	0	0	2.248	1.595	3.375	conserved hypothetical protein
MSMEG_6914	-1.58874	5.22765e-07	5.2987	7.80756e-08	272	201	219	21	20	19	88.054	94.947	81.863	15.736	15.951	12.824	K23086 glucosylglycerate hydrolase [EC:3.2.1.208]
MSMEG_3139	-2.13982	5.30803e-07	5.29689	7.96122e-08	263	209	233	7	21	17	85.141	98.726	87.096	5.245	16.749	11.475	K01692 enoyl-CoA hydratase [EC:4.2.1.17]
MSMEG_0752	-2.2795	5.33287e-07	4.69003	8.00684e-08	263	159	174	6	9	19	85.141	75.107	65.042	4.496	7.178	12.824	K01624 fructose-bisphosphate aldolase, class II [EC:4.1.2.13]
MSMEG_2513	-3.94989	5.34167e-07	1.29975	8.02842e-08	79	67	66	1	2	0	25.575	31.649	24.671	0.749	1.595	0	hypothetical protein
MSMEG_4733	-3.901	5.35664e-07	2.36978	8.05933e-08	61	48	64	1	1	0	19.747	22.674	23.923	0.749	0.798	0	putative membrane protein
MSMEG_6151	1.70266	5.58133e-07	5.07414	8.40615e-08	88	51	65	45	49	88	28.488	24.091	24.297	33.721	39.08	59.398	alpha/beta hydrolase fold-1
MSMEG_0451	1.66528	6.04626e-07	8.45125	9.13484e-08	837	607	759	686	556	622	270.961	286.73	283.716	514.052	443.44	419.833	oxidoreductase, FAD-linked
MSMEG_2933	-2.5321	6.25885e-07	3.21669	9.48549e-08	58	43	61	2	2	2	18.776	20.312	22.802	1.499	1.595	1.35	K00995 CDP-diacylglycerol---glycerol-3-phosphate 3-phosphatidyltransferase [EC:2.7.8.5]
MSMEG_1149	-3.63413	6.28397e-07	0.341184	9.53341e-08	22	20	27	0	0	0	7.122	9.447	10.093	0	0	0	K18481 Mce-associated membrane protein
MSMEG_1026	-2.56485	6.30598e-07	3.45833	9.5767e-08	152	122	107	4	7	5	49.207	57.629	39.997	2.997	5.583	3.375	putative acetyltransferase
MSMEG_6941	-1.84258	6.40326e-07	5.84	9.76313e-08	276	221	246	13	26	17	89.349	104.394	91.955	9.742	20.736	11.475	K06346 spoIIIJ-associated protein
MSMEG_6196	-2.44404	6.41524e-07	4.1587	9.79296e-08	186	148	168	7	11	6	60.213	69.911	62.799	5.245	8.773	4.05	K11735 GABA permease
MSMEG_6536	2.85171	6.47016e-07	1.23191	9.88694e-08	5	3	3	8	5	10	1.619	1.417	1.121	5.995	3.988	6.75	K01607 4-carboxymuconolactone decarboxylase [EC:4.1.1.44]
MSMEG_3664	1.74049	6.47414e-07	3.08128	9.90318e-08	29	29	40	22	29	36	9.388	13.699	14.952	16.486	23.129	24.299	K26732 K+:H+ antiporter subunit KhtU
MSMEG_2303	-2.47916	6.56098e-07	3.72911	1.00463e-07	141	111	132	2	9	9	45.646	52.433	49.342	1.499	7.178	6.075	integral membrane transporter
MSMEG_3865	-3.01587	6.6976e-07	4.95113	1.02975e-07	100	66	73	3	3	1	32.373	31.177	27.288	2.248	2.393	0.675	hypothetical protein
MSMEG_5902	-2.03315	6.78725e-07	4.18727	1.04567e-07	162	127	142	7	9	11	52.444	59.991	53.08	5.245	7.178	7.425	K02066 phospholipid/cholesterol/gamma-HCH transport system permease protein
MSMEG_1391	-3.67175	6.80043e-07	0.944608	1.04876e-07	22	21	28	0	0	0	7.122	9.92	10.466	0	0	0	transcriptional regulator, LysR family protein
MSMEG_3708	-3.01544	6.80059e-07	2.54232	1.04986e-07	69	55	67	1	2	2	22.337	25.98	25.045	0.749	1.595	1.35	K03781 catalase [EC:1.11.1.6]
MSMEG_4239	-2.48452	6.8115e-07	3.6256	1.05261e-07	59	53	63	2	3	2	19.1	25.036	23.55	1.499	2.393	1.35	LppM protein
MSMEG_1408	2.82106	6.85519e-07	1.45214	1.06044e-07	8	5	6	12	11	14	2.59	2.362	2.243	8.992	8.773	9.45	pseudogene
MSMEG_3417	-3.4206	6.94412e-07	4.09785	1.07637e-07	134	98	141	1	3	5	43.38	46.292	52.706	0.749	2.393	3.375	conserved hypothetical protein
MSMEG_4958	-2.29501	7.28459e-07	4.36297	1.13143e-07	110	92	97	4	6	5	35.61	43.458	36.259	2.997	4.785	3.375	K01586 diaminopimelate decarboxylase [EC:4.1.1.20]
MSMEG_5132	-2.20352	7.39456e-07	5.02844	1.14967e-07	162	113	167	5	9	11	52.444	53.378	62.425	3.747	7.178	7.425	K06207 GTP-binding protein
MSMEG_6782	-3.87753	7.45314e-07	2.6098	1.16112e-07	76	51	46	1	0	1	24.603	24.091	17.195	0.749	0	0.675	hypothetical protein
MSMEG_5012	2.86582	7.50789e-07	4.54176	1.17083e-07	35	31	21	92	72	27	11.33	14.644	7.85	68.94	57.424	18.224	trans-sialidase, putative
MSMEG_1918	-2.08666	7.56956e-07	4.87419	1.18175e-07	172	141	168	8	11	10	55.681	66.604	62.799	5.995	8.773	6.75	K00936 two-component system, sensor histidine kinase PdtaS [EC:2.7.13.3]
MSMEG_5992	2.41329	7.66503e-07	2.34866	1.19894e-07	16	8	10	15	15	18	5.18	3.779	3.738	11.24	11.963	12.15	K25621 3-oxo-4,17-pregnadiene-20-carboxyl-CoA hydratase alpha subunit [EC:4.2.1.-]
MSMEG_1976	2.27165	7.86184e-07	6.18251	1.23342e-07	704	424	550	325	949	1152	227.905	200.286	205.591	243.538	756.878	777.569	conserved hypothetical protein
MSMEG_1843	-2.20128	7.95062e-07	4.89933	1.25192e-07	189	110	139	6	8	10	61.185	51.961	51.959	4.496	6.38	6.75	ahcY; pseudogene
MSMEG_5785	-3.73863	7.95062e-07	2.42878	1.25234e-07	27	25	22	0	0	0	8.741	11.809	8.224	0	0	0	probable exported protein
MSMEG_2435	-2.09201	8.15409e-07	5.54748	1.28951e-07	157	143	170	13	7	9	50.825	67.549	63.546	9.742	5.583	6.075	K02959 small subunit ribosomal protein S16
MSMEG_4977	-3.0543	8.16954e-07	3.60002	1.29451e-07	76	61	65	1	1	4	24.603	28.815	24.297	0.749	0.798	2.7	K01082 3'(2'), 5'-bisphosphate nucleotidase [EC:3.1.3.7]
MSMEG_5029	-3.70722	8.28286e-07	3.57446	1.31377e-07	108	87	81	0	1	8	34.963	41.096	30.278	0	0.798	5.4	alkanal monooxygenase alpha chain
MSMEG_0688	-2.73497	8.41174e-07	3.89665	1.33776e-07	85	82	87	3	2	4	27.517	38.734	32.521	2.248	1.595	2.7	K14260 alanine-synthesizing transaminase [EC:2.6.1.66 2.6.1.2]
MSMEG_2413	-3.31366	8.67159e-07	3.55108	1.38671e-07	37	39	39	1	1	0	11.978	18.423	14.578	0.749	0.798	0	K08316 16S rRNA (guanine966-N2)-methyltransferase [EC:2.1.1.171]
MSMEG_4464	-3.42319	8.74246e-07	3.95433	1.40176e-07	86	72	83	0	4	3	27.841	34.011	31.026	0	3.19	2.025	K03568 TldD protein
MSMEG_1484	-2.2443	8.8477e-07	5.17313	1.42002e-07	203	134	149	5	8	15	65.717	63.298	55.697	3.747	6.38	10.125	K00939 adenylate kinase [EC:2.7.4.3]
MSMEG_0762	1.61408	8.9123e-07	6.00661	1.43178e-07	119	71	97	101	97	48	38.524	33.538	36.259	75.684	77.363	32.399	cytochrome P450 FAS1
MSMEG_5536	-4.62532	8.92268e-07	3.40988	1.43485e-07	326	195	272	0	4	9	105.535	92.113	101.674	0	3.19	6.075	K04093 chorismate mutase [EC:5.4.99.5]
MSMEG_1887	-2.30014	8.93049e-07	3.39543	1.43891e-07	107	99	129	3	6	9	34.639	46.765	48.221	2.248	4.785	6.075	hypothetical protein
MSMEG_3927	-3.94359	8.93049e-07	2.97482	1.43819e-07	118	95	97	0	2	4	38.2	44.875	36.259	0	1.595	2.7	K03605 hydrogenase maturation protease [EC:3.4.23.-]
MSMEG_5199	-2.76887	9.2252e-07	3.99228	1.48784e-07	99	82	76	1	4	5	32.049	38.734	28.409	0.749	3.19	3.375	K00632 acetyl-CoA acyltransferase [EC:2.3.1.16]
MSMEG_0956	-2.05375	9.3487e-07	4.4117	1.51069e-07	147	84	120	7	8	6	47.588	39.679	44.856	5.245	6.38	4.05	K01698 porphobilinogen synthase [EC:4.2.1.24]
MSMEG_2425	-3.78157	9.42941e-07	2.95626	1.52669e-07	178	108	140	2	5	1	57.624	51.016	52.332	1.499	3.988	0.675	K03320 ammonium transporter, Amt family
MSMEG_1343	-2.20545	9.52853e-07	5.33533	1.54424e-07	159	135	169	6	6	16	51.473	63.77	63.173	4.496	4.785	10.8	K14235 tRNA Trp
MSMEG_6388	-2.49543	1.00572e-06	4.87637	1.63465e-07	106	108	102	6	3	5	34.315	51.016	38.128	4.496	2.393	3.375	K11385 arabinosyltransferase A [EC:2.4.2.-]
MSMEG_0080	-3.60419	1.01379e-06	2.54025	1.65094e-07	39	34	43	0	2	0	12.625	16.061	16.074	0	1.595	0	K27090 ESX secretion-associated protein EspD/H
MSMEG_4645	-2.26806	1.01746e-06	4.2202	1.65852e-07	180	113	150	7	7	9	58.271	53.378	56.07	5.245	5.583	6.075	K00175 2-oxoglutarate/2-oxoacid ferredoxin oxidoreductase subunit beta [EC:1.2.7.3 1.2.7.11]
MSMEG_1398	-2.59526	1.01866e-06	5.00385	1.66367e-07	108	94	139	5	6	3	34.963	44.403	51.959	3.747	4.785	2.025	K02950 small subunit ribosomal protein S12
MSMEG_2541	-2.07422	1.01866e-06	4.9871	1.66234e-07	113	84	125	5	7	7	36.581	39.679	46.725	3.747	5.583	4.725	K02838 ribosome recycling factor
MSMEG_1908	3.73197	1.0528e-06	0.630753	1.72808e-07	2	2	2	11	9	6	0.647	0.945	0.748	8.243	7.178	4.05	K05549 benzoate/toluate 1,2-dioxygenase subunit alpha [EC:1.14.12.10 1.14.12.-]
MSMEG_0745	2.3255	1.05577e-06	1.51228	1.73588e-07	17	10	18	20	17	23	5.503	4.724	6.728	14.987	13.558	15.524	K03518 aerobic carbon-monoxide dehydrogenase small subunit [EC:1.2.5.3]
MSMEG_1114	-2.87775	1.0635e-06	4.08141	1.75084e-07	221	140	129	5	5	6	71.544	66.132	48.221	3.747	3.988	4.05	short chain dehydrogenase
MSMEG_5323	-2.74712	1.0635e-06	2.6737	1.75193e-07	297	187	247	15	5	10	96.147	88.334	92.329	11.24	3.988	6.75	conserved hypothetical protein
MSMEG_4046	2.01429	1.07349e-06	3.51517	1.77007e-07	20	18	22	15	24	27	6.475	8.503	8.224	11.24	19.141	18.224	K18289 itaconate CoA-transferase [EC:2.8.3.- 2.8.3.22]
MSMEG_4260	-2.83669	1.13461e-06	4.7481	1.87619e-07	136	119	159	4	5	5	44.027	56.212	59.435	2.997	3.988	3.375	K02276 cytochrome c oxidase subunit III [EC:7.1.1.9]
MSMEG_6074	-1.69204	1.17637e-06	5.72251	1.95077e-07	185	171	167	12	15	15	59.89	80.776	62.425	8.992	11.963	10.125	K01883 cysteinyl-tRNA synthetase [EC:6.1.1.16]
MSMEG_1438	-3.88136	1.18431e-06	3.48123	1.9658e-07	93	57	92	2	2	0	30.107	26.925	34.39	1.499	1.595	0	K02892 large subunit ribosomal protein L23
MSMEG_1634	-3.81425	1.22694e-06	3.28406	2.04041e-07	49	38	28	1	0	0	15.863	17.95	10.466	0.749	0	0	probable forkhead-associated protein
MSMEG_1243	-2.23927	1.23368e-06	5.06003	2.05355e-07	154	129	131	6	13	5	49.854	60.936	48.968	4.496	10.368	3.375	conserved hypothetical protein
MSMEG_1058	-1.64603	1.23876e-06	5.22522	2.06524e-07	188	165	172	11	16	17	60.861	77.941	64.294	8.243	12.761	11.475	IS1096, tnpR protein
MSMEG_6533	2.09704	1.23876e-06	3.27491	2.06589e-07	22	13	18	18	25	18	7.122	6.141	6.728	13.488	19.939	12.15	conserved hypothetical protein
MSMEG_4914	-2.25337	1.24227e-06	4.26827	2.07369e-07	154	121	134	7	13	4	49.854	57.157	50.09	5.245	10.368	2.7	K18235 virginiamycin B lyase [EC:4.2.99.-]
MSMEG_1977	1.99262	1.24528e-06	7.89427	2.08067e-07	3221	2123	2460	1317	3395	4554	1042.73	1002.85	919.555	986.89	2707.69	3073.83	K18382 NAD+-dependent secondary alcohol dehydrogenase Adh1 [EC:1.1.1.-]
MSMEG_1524	-2.32667	1.24652e-06	4.61225	2.08471e-07	189	128	162	3	9	17	61.185	60.464	60.556	2.248	7.178	11.475	K03040 DNA-directed RNA polymerase subunit alpha [EC:2.7.7.6]
MSMEG_6737	1.79376	1.27573e-06	4.42174	2.13556e-07	43	39	32	43	37	27	13.92	18.423	11.962	32.222	29.509	18.224	putative membrane protein
MSMEG_6114	-2.34248	1.28784e-06	5.02569	2.15784e-07	77	62	94	3	5	3	24.927	29.287	35.137	2.248	3.988	2.025	K01507 inorganic pyrophosphatase [EC:3.6.1.1]
MSMEG_2598	2.16934	1.28865e-06	4.58766	2.16124e-07	38	16	24	23	32	37	12.302	7.558	8.971	17.235	25.522	24.974	short chain dehydrogenase
MSMEG_0471	2.64977	1.28957e-06	2.52677	2.16601e-07	6	8	7	17	10	10	1.942	3.779	2.617	12.739	7.976	6.75	transcriptional regulator LysR family protein
MSMEG_0777	-1.58732	1.31805e-06	7.32589	2.21675e-07	624	389	423	32	58	38	202.006	183.753	158.119	23.979	46.258	25.649	K15510 coenzyme F420-dependent glucose-6-phosphate dehydrogenase [EC:1.1.98.2]
MSMEG_3409	1.97653	1.32802e-06	4.44255	2.23559e-07	41	21	30	32	26	38	13.273	9.92	11.214	23.979	20.736	25.649	oxidoreductase
MSMEG_3214	-2.76475	1.33026e-06	3.90716	2.24144e-07	126	99	110	2	3	9	40.79	46.765	41.118	1.499	2.393	6.075	hypothetical protein
MSMEG_3047	-2.13432	1.3321e-06	5.84068	2.24873e-07	323	210	281	6	22	28	104.564	99.198	105.039	4.496	17.546	18.899	K01955 carbamoyl-phosphate synthase large subunit [EC:6.3.5.5]
MSMEG_0549	-3.43866	1.34241e-06	3.03312	2.27456e-07	59	45	46	0	2	1	19.1	21.257	17.195	0	1.595	0.675	K15554 sulfonate transport system permease protein
MSMEG_4968	1.69107	1.34896e-06	3.85533	2.28777e-07	44	31	37	46	28	26	14.244	14.644	13.831	34.47	22.331	17.549	two-component system sensor kinase
MSMEG_1641	-3.23053	1.3571e-06	3.53673	2.30526e-07	85	71	91	3	2	1	27.517	33.538	34.016	2.248	1.595	0.675	conserved hypothetical protein
MSMEG_2045	-1.81637	1.36423e-06	4.89328	2.32009e-07	142	129	138	8	15	8	45.969	60.936	51.585	5.995	11.963	5.4	K20938 long-chain alkane monooxygenase [EC:1.14.14.28]
MSMEG_0055	-1.73657	1.37492e-06	4.43609	2.34475e-07	151	126	126	9	10	12	48.883	59.519	47.099	6.744	7.976	8.1	K27098 ESX secretion-associated protein EspA/E
MSMEG_1341	-2.98759	1.3768e-06	4.3988	2.35011e-07	82	80	92	3	4	1	26.546	37.79	34.39	2.248	3.19	0.675	K27072 meromycolic acid (3R)-3-hydroxyacyl-[acyl carrier protein] dehydratase HadB [EC:4.2.1.-]
MSMEG_6922	-2.78674	1.39363e-06	4.10858	2.38103e-07	98	93	103	1	5	6	31.725	43.931	38.502	0.749	3.988	4.05	transporter, major facilitator family protein
MSMEG_4674	-2.59045	1.40422e-06	4.36211	2.40132e-07	124	80	82	2	6	4	40.142	37.79	30.652	1.499	4.785	2.7	K03545 trigger factor
MSMEG_3970	2.19269	1.40641e-06	2.85937	2.40726e-07	17	9	25	20	17	22	5.503	4.251	9.345	14.987	13.558	14.849	K02433 aspartyl-tRNA(Asn)/glutamyl-tRNA(Gln) amidotransferase subunit A [EC:6.3.5.6 6.3.5.7]
MSMEG_1653	-2.0136	1.47311e-06	4.94426	2.53299e-07	221	212	196	14	8	21	71.544	100.143	73.265	10.491	6.38	14.174	hypothetical protein
MSMEG_1972	2.30488	1.53663e-06	3.52795	2.65426e-07	83	52	79	37	150	141	26.869	24.563	29.53	27.726	119.633	95.171	K18225 propane monooxygenase reductase component [EC:1.18.1.-]
MSMEG_5197	-2.0874	1.54226e-06	4.28754	2.66642e-07	128	107	133	4	13	7	41.437	50.544	49.716	2.997	10.368	4.725	K00255 long-chain-acyl-CoA dehydrogenase [EC:1.3.8.8]
MSMEG_1652	-2.1857	1.57188e-06	4.67298	2.72009e-07	124	86	84	4	5	7	40.142	40.624	31.399	2.997	3.988	4.725	K01740 O-acetylhomoserine (thiol)-lyase [EC:2.5.1.49]
MSMEG_6353	-2.59391	1.60506e-06	3.71974	2.78003e-07	65	44	60	2	2	2	21.042	20.784	22.428	1.499	1.595	1.35	delta3,5-delta2,4-dienoyl-CoA isomerase
MSMEG_2798	-3.52641	1.61507e-06	3.62508	2.80243e-07	125	103	133	3	2	2	40.466	48.654	49.716	2.248	1.595	1.35	hypothetical protein
MSMEG_0422	-2.16808	1.62155e-06	4.95899	2.81622e-07	230	172	158	10	13	9	74.457	81.248	59.061	7.493	10.368	6.075	transferase
MSMEG_1182	2.60968	1.65303e-06	2.47225	2.87867e-07	8	9	8	21	16	8	2.59	4.251	2.99	15.736	12.761	5.4	K01468 imidazolonepropionase [EC:3.5.2.7]
MSMEG_1521	-3.16459	1.67548e-06	4.68221	2.92039e-07	203	125	210	2	4	12	65.717	59.046	78.499	1.499	3.19	8.1	K02952 small subunit ribosomal protein S13
MSMEG_5865	2.33606	1.72179e-06	2.9379	3.00381e-07	10	11	13	19	19	10	3.237	5.196	4.859	14.238	15.154	6.75	conserved hypothetical protein
MSMEG_2414	-3.56679	1.75644e-06	4.48876	3.06701e-07	115	92	113	6	4	0	37.229	43.458	42.24	4.496	3.19	0	K00954 pantetheine-phosphate adenylyltransferase [EC:2.7.7.3]
MSMEG_3003	-2.74269	1.78551e-06	4.11082	3.12618e-07	84	74	84	6	1	3	27.193	34.956	31.399	4.496	0.798	2.025	K01876 aspartyl-tRNA synthetase [EC:6.1.1.12]
MSMEG_4536	-3.93069	1.79363e-06	4.48085	3.14603e-07	155	134	145	7	1	1	50.178	63.298	54.201	5.245	0.798	0.675	conserved hypothetical protein
MSMEG_6413	-2.62923	1.85155e-06	3.71478	3.25053e-07	59	44	60	3	1	2	19.1	20.784	22.428	2.248	0.798	1.35	K01875 seryl-tRNA synthetase [EC:6.1.1.11]
MSMEG_2658	-2.67771	1.94445e-06	5.09035	3.42582e-07	115	86	88	3	7	2	37.229	40.624	32.895	2.248	5.583	1.35	K17836 beta-lactamase class A [EC:3.5.2.6]
MSMEG_5264	-2.13172	1.94805e-06	5.32573	3.43521e-07	133	111	120	6	11	5	43.056	52.433	44.856	4.496	8.773	3.375	conserved hypothetical protein
MSMEG_3152	-1.68448	1.95757e-06	5.49239	3.45509e-07	188	150	181	12	13	17	60.861	70.856	67.658	8.992	10.368	11.475	K01772 protoporphyrin/coproporphyrin ferrochelatase [EC:4.98.1.1 4.99.1.9]
MSMEG_4665	1.92172	1.96837e-06	5.14334	3.47722e-07	79	80	87	56	70	140	25.575	37.79	32.521	41.963	55.829	94.496	K03335 inosose dehydratase [EC:4.2.1.44]
MSMEG_3735	-2.23221	2.00361e-06	4.41269	3.55205e-07	91	77	96	3	6	5	29.459	36.373	35.885	2.248	4.785	3.375	K07090 uncharacterized protein
MSMEG_6386	-2.79891	2.06991e-06	3.60208	3.67284e-07	43	34	39	1	1	1	13.92	16.061	14.578	0.749	0.798	0.675	K13686 galactan 5-O-arabinofuranosyltransferase [EC:2.4.2.46]
MSMEG_2048	-2.17867	2.17596e-06	4.66435	3.86443e-07	169	110	134	6	9	8	54.71	51.961	50.09	4.496	7.178	5.4	K00001 alcohol dehydrogenase [EC:1.1.1.1]
MSMEG_2368	-2.2913	2.17989e-06	3.64776	3.87825e-07	70	49	71	2	2	6	22.661	23.146	26.54	1.499	1.595	4.05	transcriptional regulator, TetR family protein domain protein, putative
MSMEG_1971	1.82596	2.25963e-06	7.7637	4.03076e-07	4766	3003	4078	1891	4502	5875	1542.89	1418.53	1524.37	1417.02	3590.58	3965.47	K18223 propane 2-monooxygenase large subunit [EC:1.14.13.227]
MSMEG_2900	-2.97922	2.25963e-06	1.85842	4.0244e-07	20	9	15	0	0	0	6.475	4.251	5.607	0	0	0	2-hydroxy-6-oxo-6-phenylhexa-2,4-dienoate hydrolase
MSMEG_0057	-2.24079	2.29369e-06	3.65216	4.10591e-07	123	92	118	3	5	12	39.819	43.458	44.109	2.248	3.988	8.1	K27091 ESX secretion-associated protein EspG
MSMEG_2027	-2.36069	2.29369e-06	6.19798	4.10392e-07	262	254	259	13	17	10	84.817	119.982	96.815	9.742	13.558	6.75	K00540 F420H(2)-dependent quinone reductase [EC:1.1.98.-]
MSMEG_5214	-3.25989	2.3111e-06	0.454489	4.14069e-07	36	17	25	0	0	1	11.654	8.03	9.345	0	0	0.675	K03088 RNA polymerase sigma-70 factor, ECF subfamily
MSMEG_1920	-2.04134	2.32356e-06	4.84916	4.16666e-07	92	74	98	5	4	7	29.783	34.956	36.633	3.747	3.19	4.725	diacylglycerol kinase, catalytic region
MSMEG_1973	1.76245	2.36526e-06	4.57267	4.25256e-07	313	196	246	106	300	354	101.327	92.585	91.955	79.431	239.266	238.941	pseudogene
MSMEG_2692	-2.17301	2.37091e-06	5.04457	4.26645e-07	175	123	169	4	11	14	56.652	58.102	63.173	2.997	8.773	9.45	K00995 CDP-diacylglycerol---glycerol-3-phosphate 3-phosphatidyltransferase [EC:2.7.8.5]
MSMEG_4946	-1.76206	2.39724e-06	5.55389	4.32512e-07	271	185	246	14	20	20	87.73	87.389	91.955	10.491	15.951	13.499	IS1096, tnpR protein
MSMEG_3032	-2.21051	2.47337e-06	4.3902	4.4741e-07	132	115	131	7	9	5	42.732	54.323	48.968	5.245	7.178	3.375	conserved hypothetical protein
MSMEG_2330	-3.15737	2.52309e-06	3.58439	4.56801e-07	48	47	52	0	2	2	15.539	22.201	19.438	0	1.595	1.35	SAM-dependent methyltransferase
MSMEG_2575	-2.57717	2.52771e-06	4.36775	4.58033e-07	84	63	79	3	7	1	27.193	29.759	29.53	2.248	5.583	0.675	conserved hypothetical protein
MSMEG_1263	1.8088	2.54137e-06	4.32665	4.60907e-07	64	51	48	58	55	41	20.719	24.091	17.943	43.462	43.865	27.674	conserved hypothetical protein
MSMEG_6572	-1.72577	2.5426e-06	3.27667	4.61529e-07	168	113	136	10	8	15	54.386	53.378	50.837	7.493	6.38	10.125	methyltransferase
MSMEG_4216	-2.16256	2.54981e-06	5.00647	4.63238e-07	137	99	117	8	7	5	44.351	46.765	43.735	5.995	5.583	3.375	conserved hypothetical protein
MSMEG_1597	-2.76337	2.55302e-06	3.97438	4.64223e-07	139	98	176	3	9	4	44.998	46.292	65.789	2.248	7.178	2.7	K18955 WhiB family transcriptional regulator, redox-sensing transcriptional regulator
MSMEG_4057	2.00266	2.56548e-06	5.11664	4.6713e-07	42	42	54	57	29	69	13.597	19.84	20.185	42.713	23.129	46.573	transcriptional regulator, GntR family protein
MSMEG_4669	1.65644	2.71734e-06	4.24009	4.96659e-07	71	38	38	50	45	29	22.985	17.95	14.205	37.467	35.89	19.574	K02379 FdhD protein
MSMEG_4896	-2.50563	2.78039e-06	5.18767	5.09055e-07	96	105	100	5	5	3	31.078	49.599	37.38	3.747	3.988	2.025	non-ribosomal peptide synthetase
MSMEG_0726	-2.6017	2.83495e-06	2.98829	5.1976e-07	112	74	99	6	2	4	36.258	34.956	37.006	4.496	1.595	2.7	hypothetical protein
MSMEG_6087	-3.02177	2.83495e-06	4.71468	5.19933e-07	174	125	181	7	3	5	56.329	59.046	67.658	5.245	2.393	3.375	beta-lactamase
MSMEG_5329	-2.44236	2.83802e-06	4.02616	5.21387e-07	111	84	109	5	6	3	35.934	39.679	40.744	3.747	4.785	2.025	K23541 Ca2+/H+ antiporter, TMEM165/GDT1 family
MSMEG_5912	-2.25904	2.83802e-06	4.41792	5.20977e-07	214	161	164	6	14	10	69.278	76.052	61.304	4.496	11.166	6.75	K00135 succinate-semialdehyde dehydrogenase / glutarate-semialdehyde dehydrogenase [EC:1.2.1.16]
MSMEG_1326	2.28515	2.90289e-06	1.82104	5.34671e-07	15	9	20	22	21	14	4.856	4.251	7.476	16.486	16.749	9.45	hypothetical protein
MSMEG_3490	-3.48185	2.99469e-06	3.34929	5.52519e-07	70	40	66	0	1	3	22.661	18.895	24.671	0	0.798	2.025	putative membrane acyltransferase
MSMEG_2743	-1.6856	3.07483e-06	5.26945	5.6827e-07	216	153	166	12	16	15	69.925	72.273	62.051	8.992	12.761	10.125	K07738 transcriptional repressor NrdR
MSMEG_1930	-1.79118	3.08298e-06	5.10284	5.70259e-07	221	133	181	10	13	17	71.544	62.825	67.658	7.493	10.368	11.475	DEAD/DEAH box helicase
MSMEG_5432	-3.89023	3.10751e-06	2.46394	5.75283e-07	45	18	23	0	0	0	14.568	8.503	8.597	0	0	0	K01056 peptidyl-tRNA hydrolase, PTH1 family [EC:3.1.1.29]
MSMEG_4485	-2.29228	3.18729e-06	4.42214	5.91054e-07	83	59	81	5	3	3	26.869	27.87	30.278	3.747	2.393	2.025	K01880 glycyl-tRNA synthetase [EC:6.1.1.14]
MSMEG_3507	-1.97703	3.22353e-06	4.96271	5.9828e-07	193	107	142	9	13	7	62.48	50.544	53.08	6.744	10.368	4.725	K01623 fructose-bisphosphate aldolase, class I [EC:4.1.2.13]
MSMEG_4627	-3.32134	3.29383e-06	4.65553	6.12878e-07	82	75	88	0	4	4	26.546	35.428	32.895	0	3.19	2.7	K00940 nucleoside-diphosphate kinase [EC:2.7.4.6]
MSMEG_4979	-3.16409	3.29486e-06	1.3408	6.13586e-07	19	14	16	0	0	0	6.151	6.613	5.981	0	0	0	K00957 sulfate adenylyltransferase subunit 2 [EC:2.7.7.4]
MSMEG_1148	-3.27702	3.3074e-06	1.15975	6.17379e-07	36	35	41	1	1	0	11.654	16.533	15.326	0.749	0.798	0	K02067 phospholipid/cholesterol/gamma-HCH transport system substrate-binding protein
MSMEG_2621	-1.77582	3.3074e-06	5.2767	6.17478e-07	162	145	139	8	13	13	52.444	68.494	51.959	5.995	10.368	8.775	K01881 prolyl-tRNA synthetase [EC:6.1.1.15]
MSMEG_4999	-1.82792	3.34371e-06	4.47839	6.25307e-07	134	104	96	8	6	10	43.38	49.127	35.885	5.995	4.785	6.75	K13889 glutathione transport system substrate-binding protein
MSMEG_5069	-2.39707	3.35938e-06	3.26342	6.28765e-07	51	43	44	2	3	1	16.51	20.312	16.447	1.499	2.393	0.675	K03117 sec-independent protein translocase protein TatB
MSMEG_2873	2.59111	3.49553e-06	2.11401	6.55892e-07	5	9	11	12	16	11	1.619	4.251	4.112	8.992	12.761	7.425	K16051 3-oxo-5alpha-steroid 4-dehydrogenase [EC:1.3.99.5]
MSMEG_4396	-2.71732	3.51432e-06	3.82572	6.59968e-07	157	101	97	3	5	5	50.825	47.71	36.259	2.248	3.988	3.375	isochorismatase hydrolase
MSMEG_2153	2.42398	3.53623e-06	3.14336	6.64638e-07	14	14	11	28	13	18	4.532	6.613	4.112	20.982	10.368	12.15	transcriptional regulator, TetR family protein
MSMEG_2349	-1.74127	3.72183e-06	4.45213	7.01273e-07	118	92	107	7	9	8	38.2	43.458	39.997	5.245	7.178	5.4	K16149 1,4-alpha-glucan branching enzyme [EC:2.4.1.18]
MSMEG_2437	-2.27444	3.80133e-06	4.71214	7.17447e-07	94	56	72	3	5	3	30.43	26.453	26.914	2.248	3.988	2.025	K02860 16S rRNA processing protein RimM
MSMEG_5418	-3.07163	3.85165e-06	2.30914	7.27548e-07	55	40	61	0	2	3	17.805	18.895	22.802	0	1.595	2.025	K07243 high-affinity iron transporter
MSMEG_4269	-2.21416	3.92098e-06	4.55826	7.41874e-07	91	61	78	4	5	3	29.459	28.815	29.157	2.997	3.988	2.025	K01953 asparagine synthase (glutamine-hydrolysing) [EC:6.3.5.4]
MSMEG_4047	2.65835	3.94007e-06	2.06031	7.46105e-07	9	3	6	5	12	15	2.914	1.417	2.243	3.747	9.571	10.125	K06897 7,8-dihydropterin-6-yl-methyl-4-(beta-D-ribofuranosyl)aminobenzene 5'-phosphate synthase
MSMEG_1332	-2.71029	3.96296e-06	3.26014	7.5106e-07	102	77	92	1	9	3	33.02	36.373	34.39	0.749	7.178	2.025	conserved hypothetical protein
MSMEG_2201	-2.17584	4.03829e-06	4.6002	7.65971e-07	103	78	106	5	9	3	33.344	36.845	39.623	3.747	7.178	2.025	ZbpA protein
MSMEG_1146	-3.07573	4.06333e-06	1.04254	7.71994e-07	48	30	39	0	1	2	15.539	14.171	14.578	0	0.798	1.35	K02067 phospholipid/cholesterol/gamma-HCH transport system substrate-binding protein
MSMEG_1261	-1.88487	4.33803e-06	4.63556	8.26227e-07	208	147	193	15	7	19	67.335	69.439	72.144	11.24	5.583	12.824	hypothetical protein
MSMEG_1141	-2.77908	4.34491e-06	1.73173	8.28218e-07	51	38	47	1	2	1	16.51	17.95	17.569	0.749	1.595	0.675	K02066 phospholipid/cholesterol/gamma-HCH transport system permease protein
MSMEG_2763	2.27226	4.35909e-06	3.08176	8.32289e-07	13	6	7	9	11	13	4.208	2.834	2.617	6.744	8.773	8.775	conserved hypothetical protein
MSMEG_6412	-2.72648	4.58983e-06	4.19402	8.79946e-07	84	74	57	3	1	4	27.193	34.956	21.307	2.248	0.798	2.7	conserved hypothetical protein
MSMEG_1042	-2.16663	4.62745e-06	4.57381	8.87884e-07	112	68	100	7	6	3	36.258	32.121	37.38	5.245	4.785	2.025	hypothetical protein
MSMEG_2698	-2.60485	4.73067e-06	3.5807	9.09174e-07	65	36	62	2	1	3	21.042	17.005	23.176	1.499	0.798	2.025	K10533 limonene-1,2-epoxide hydrolase [EC:3.3.2.8]
MSMEG_0450	2.13018	4.7307e-06	4.01497	9.09921e-07	29	17	38	34	36	26	9.388	8.03	14.205	25.478	28.712	17.549	hypothetical protein
MSMEG_4200	-1.61904	4.89423e-06	5.71874	9.4368e-07	224	202	241	13	22	23	72.515	95.419	90.086	9.742	17.546	15.524	peptidase M20
MSMEG_3386	-2.97941	4.92477e-06	1.20427	9.50339e-07	17	13	13	0	0	0	5.503	6.141	4.859	0	0	0	shikimate transporter
MSMEG_6635	-2.69667	4.9477e-06	4.39142	9.56317e-07	95	106	127	10	3	2	30.754	50.071	47.473	7.493	2.393	1.35	K13929 malonate decarboxylase alpha subunit [EC:2.3.1.187]
MSMEG_6823	-2.11228	4.95703e-06	4.2748	9.58899e-07	88	87	108	5	6	5	28.488	41.096	40.371	3.747	4.785	3.375	short-chain dehydrogenase/reductase SDR
MSMEG_4687	-3.53731	4.99014e-06	1.79635	9.66868e-07	33	26	34	1	0	0	10.683	12.282	12.709	0.749	0	0	K03365 cytosine/creatinine deaminase [EC:3.5.4.1 3.5.4.21]
MSMEG_2654	-4.57962	5.07003e-06	3.62475	9.83144e-07	76	49	115	2	0	0	24.603	23.146	42.987	1.499	0	0	K02956 small subunit ribosomal protein S15
MSMEG_2322	-2.06927	5.07075e-06	4.69993	9.8408e-07	120	70	92	5	8	4	38.847	33.066	34.39	3.747	6.38	2.7	hypothetical protein
MSMEG_6896	-1.69745	5.07778e-06	4.93052	9.8624e-07	126	110	127	7	10	12	40.79	51.961	47.473	5.245	7.976	8.1	K03111 single-strand DNA-binding protein
MSMEG_5831	-2.01807	5.07944e-06	4.94207	9.87359e-07	123	118	149	6	6	14	39.819	55.74	55.697	4.496	4.785	9.45	K23265 phosphoribosylformylglycinamidine synthase subunit PurQ / glutaminase [EC:6.3.5.3 3.5.1.2]
MSMEG_0030	-1.73355	5.0867e-06	4.94048	9.90366e-07	172	135	165	13	8	17	55.681	63.77	61.677	9.742	6.38	11.475	K12132 eukaryotic-like serine/threonine-protein kinase [EC:2.7.11.1]
MSMEG_0781	-3.42563	5.2422e-06	1.81317	1.02311e-06	34	18	36	0	0	1	11.007	8.503	13.457	0	0	0.675	amino acid permease
MSMEG_3904	-2.37023	5.24778e-06	4.06202	1.02502e-06	161	112	150	3	8	12	52.12	52.906	56.07	2.248	6.38	8.1	LppK protein
MSMEG_0278	1.67638	5.29452e-06	3.98906	1.03498e-06	56	33	48	42	38	36	18.129	15.588	17.943	31.473	30.307	24.299	hypothetical protein
MSMEG_6086	-2.6979	5.33014e-06	4.44155	1.04445e-06	152	119	131	5	12	2	49.207	56.212	48.968	3.747	9.571	1.35	K21481 heme oxygenase (mycobilin-producing) [EC:1.14.99.57]
MSMEG_1934	-1.82214	5.37884e-06	5.7481	1.05484e-06	222	178	201	16	20	10	71.868	84.082	75.134	11.99	15.951	6.75	ATP-binding protein
MSMEG_4180	-1.90044	5.39131e-06	4.50227	1.05898e-06	92	86	92	5	6	7	29.783	40.624	34.39	3.747	4.785	4.725	K00765 ATP phosphoribosyltransferase [EC:2.4.2.17]
MSMEG_5414	-1.79385	5.42993e-06	4.98286	1.06741e-06	149	107	124	10	6	13	48.236	50.544	46.352	7.493	4.785	8.775	K09009 uncharacterized protein
MSMEG_0728	-3.28335	5.49479e-06	2.77039	1.08189e-06	63	52	61	3	2	0	20.395	24.563	22.802	2.248	1.595	0	K27089 ESX secretion-associated protein EspC/F
MSMEG_5993	2.2832	5.58709e-06	2.36254	1.10182e-06	11	15	13	17	17	16	3.561	7.086	4.859	12.739	13.558	10.8	K22822 3-oxo-4-pregnene-20-carboxyl-CoA dehydrogenase beta subunit [EC:1.3.99.-]
MSMEG_6897	-3.1123	5.62512e-06	2.87323	1.1102e-06	59	39	47	1	1	1	19.1	18.423	17.569	0.749	0.798	0.675	K02990 small subunit ribosomal protein S6
MSMEG_6155	-2.06658	5.77069e-06	3.87055	1.13983e-06	75	74	77	4	4	5	24.28	34.956	28.783	2.997	3.19	3.375	IS1096, tnpA protein
MSMEG_0591	2.35718	5.80552e-06	3.10412	1.14839e-06	12	13	17	11	25	24	3.885	6.141	6.355	8.243	19.939	16.199	K00848 rhamnulokinase [EC:2.7.1.5]
MSMEG_0590	2.59457	6.00561e-06	2.69628	1.19283e-06	17	7	9	12	16	26	5.503	3.307	3.364	8.992	12.761	17.549	rhaD; rhamnulose-1-phosphate aldolase/alcohol dehydrogenase
MSMEG_4145	-1.88161	6.01575e-06	4.95461	1.19579e-06	160	87	130	6	9	11	51.797	41.096	48.594	4.496	7.178	7.425	cupin 2 protein
MSMEG_3837	-1.63265	6.05417e-06	4.45662	1.2049e-06	145	104	140	7	12	14	46.941	49.127	52.332	5.245	9.571	9.45	conserved hypothetical protein
MSMEG_4955	-1.73522	6.08319e-06	5.5332	1.21206e-06	213	162	182	11	14	19	68.954	76.524	68.032	8.243	11.166	12.824	K00872 homoserine kinase [EC:2.7.1.39]
MSMEG_4546	-3.5181	6.22953e-06	3.88366	1.24219e-06	275	216	154	5	2	8	89.025	102.032	57.566	3.747	1.595	5.4	pseudogene
MSMEG_1444	-3.51825	6.35821e-06	2.58524	1.27034e-06	72	37	52	0	2	1	23.308	17.478	19.438	0	1.595	0.675	K02904 large subunit ribosomal protein L29
MSMEG_3513	-1.76756	6.35821e-06	4.62241	1.27084e-06	179	130	129	9	16	9	57.947	61.408	48.221	6.744	12.761	6.075	enhanced intracellular survival protein
MSMEG_1002	-1.63009	6.5525e-06	5.45616	1.31379e-06	226	205	195	12	21	21	73.163	96.836	72.892	8.992	16.749	14.174	IS1096, tnpR protein
MSMEG_2327	-2.35308	7.43675e-06	4.40914	1.50275e-06	139	70	96	2	6	8	44.998	33.066	35.885	1.499	4.785	5.4	nudix hydrolase
MSMEG_0790	-1.86212	7.75231e-06	4.46507	1.56895e-06	150	110	112	7	10	9	48.559	51.961	41.866	5.245	7.976	6.075	K03574 8-oxo-dGTP diphosphatase [EC:3.6.1.55]
MSMEG_4572	-2.42656	7.86621e-06	4.12149	1.59765e-06	176	101	82	3	5	9	56.976	47.71	30.652	2.248	3.988	6.075	K02340 DNA polymerase III subunit delta [EC:2.7.7.7]
MSMEG_2943	-2.34406	7.92087e-06	4.00194	1.61348e-06	88	64	80	3	3	5	28.488	30.232	29.904	2.248	2.393	3.375	K01159 crossover junction endodeoxyribonuclease RuvC [EC:3.1.21.10]
MSMEG_4309	1.66962	7.92087e-06	4.06317	1.61425e-06	33	39	41	35	43	21	10.683	18.423	15.326	26.227	34.295	14.174	K25307 low molecular weight protein-tyrosine phosphatase [EC:3.1.3.48]
MSMEG_3710	-3.87452	7.92512e-06	1.14095	1.61636e-06	48	47	63	3	0	0	15.539	22.201	23.55	2.248	0	0	cytochrome b561 family protein
MSMEG_1620	-2.18219	8.00732e-06	3.92343	1.63517e-06	473	356	280	18	20	25	153.123	168.164	104.665	13.488	15.951	16.874	conserved hypothetical protein
MSMEG_1526	-2.2186	8.08273e-06	4.00123	1.65231e-06	71	49	58	6	2	2	22.985	23.146	21.681	4.496	1.595	1.35	K27358 cutinase-like protein [EC:3.1.1.-]
MSMEG_5942	1.70208	8.1942e-06	3.76166	1.67767e-06	25	34	33	22	27	29	8.093	16.061	12.335	16.486	21.534	19.574	AMP-dependent synthetase and ligase
MSMEG_6571	-3.22472	8.27186e-06	1.91364	1.69746e-06	17	20	15	0	0	0	5.503	9.447	5.607	0	0	0	conserved hypothetical protein
MSMEG_4257	-2.5716	8.32034e-06	3.78529	1.71002e-06	80	43	71	3	1	4	25.898	20.312	26.54	2.248	0.798	2.7	conserved hypothetical protein
MSMEG_1962	-2.47055	8.50605e-06	2.44601	1.74952e-06	79	42	58	4	3	1	25.575	19.84	21.681	2.997	2.393	0.675	hypothetical protein
MSMEG_5696	-2.17308	8.53923e-06	4.78917	1.75768e-06	76	74	94	5	4	4	24.603	34.956	35.137	3.747	3.19	2.7	K03704 cold shock protein
MSMEG_6397	-2.92426	8.69486e-06	1.04399	1.79381e-06	12	13	17	0	0	0	3.885	6.141	6.355	0	0	0	hypothetical protein
MSMEG_1047	-2.3116	8.78638e-06	4.48923	1.81683e-06	111	82	90	3	3	10	35.934	38.734	33.642	2.248	2.393	6.75	nudix hydrolase
MSMEG_0589	2.55307	8.80494e-06	2.44922	1.82204e-06	11	10	4	13	11	13	3.561	4.724	1.495	9.742	8.773	8.775	K01820 L-rhamnose isomerase / sugar isomerase [EC:5.3.1.14 5.3.1.-]
MSMEG_6557	1.71815	8.98297e-06	5.48744	1.86452e-06	59	47	52	82	46	27	19.1	22.201	19.438	61.446	36.687	18.224	dehydrogenase
MSMEG_3500	-2.54578	9.29394e-06	3.75137	1.93053e-06	52	38	51	1	4	1	16.834	17.95	19.064	0.749	3.19	0.675	K09861 uncharacterized protein
MSMEG_2094	1.70854	9.63026e-06	4.69893	2.00643e-06	54	24	39	33	33	33	17.481	11.337	14.578	24.728	26.319	22.274	K17285 methanethiol oxidase [EC:1.8.3.4]
MSMEG_4161	-3.06969	9.66376e-06	1.83059	2.01493e-06	27	17	23	0	0	1	8.741	8.03	8.597	0	0	0.675	hypothetical protein
MSMEG_2931	-2.28957	9.74293e-06	4.80516	2.03296e-06	181	125	154	6	10	8	58.595	59.046	57.566	4.496	7.976	5.4	K01868 threonyl-tRNA synthetase [EC:6.1.1.3]
MSMEG_4647	-1.87905	9.79402e-06	4.60765	2.04758e-06	80	54	87	7	4	4	25.898	25.508	32.521	5.245	3.19	2.7	carbohydrate kinase, PfkB, putative
MSMEG_0866	-1.90278	9.90675e-06	4.77353	2.07492e-06	93	95	114	10	6	5	30.107	44.875	42.614	7.493	4.785	3.375	DNA or RNA helicase of superfamily protein II
MSMEG_6389	-1.96727	1.02281e-05	5.42327	2.14704e-06	168	101	108	7	9	8	54.386	47.71	40.371	5.245	7.178	5.4	K11386 arabinosyltransferase B [EC:2.4.2.-]
MSMEG_2348	-2.14427	1.08779e-05	3.77687	2.29197e-06	73	44	52	4	2	3	23.632	20.784	19.438	2.997	1.595	2.025	pseudogene
MSMEG_1979	1.74407	1.10768e-05	6.1609	2.33562e-06	781	491	649	275	694	941	252.832	231.935	242.598	206.07	553.502	635.15	antibiotic biosynthesis monooxygenase
MSMEG_3973	1.63286	1.15082e-05	3.66606	2.43379e-06	66	31	33	22	43	42	21.366	14.644	12.335	16.486	34.295	28.349	K01474 N-methylhydantoinase B [EC:3.5.2.14]
MSMEG_6152	2.29013	1.15332e-05	2.61751	2.44089e-06	10	8	8	6	14	17	3.237	3.779	2.99	4.496	11.166	11.475	K14234 tRNA Thr
MSMEG_0560	-3.49329	1.17257e-05	2.64396	2.48347e-06	26	27	39	0	0	1	8.417	12.754	14.578	0	0	0.675	dapB; dihydrodipicolinate reductase, N-terminus domain protein
MSMEG_3957	-2.99214	1.20857e-05	2.77342	2.56731e-06	78	58	62	3	6	0	25.251	27.398	23.176	2.248	4.785	0	conserved 13e12 repeat family protein
MSMEG_4740	-3.07199	1.20857e-05	2.18417	2.56732e-06	27	31	42	0	1	1	8.741	14.644	15.7	0	0.798	0.675	Glycosyltransferase family protein 28
MSMEG_5513	-1.77056	1.21485e-05	4.74535	2.58255e-06	134	99	130	9	8	10	43.38	46.765	48.594	6.744	6.38	6.75	K08884 serine/threonine protein kinase, bacterial [EC:2.7.11.1]
MSMEG_0390	-2.51893	1.22323e-05	3.36424	2.60421e-06	46	34	48	1	1	3	14.891	16.061	17.943	0.749	0.798	2.025	putative acyltransferase
MSMEG_4199	-3.04257	1.24115e-05	3.00942	2.64821e-06	36	28	31	1	0	1	11.654	13.226	11.588	0.749	0	0.675	conserved hypothetical protein
MSMEG_0079	-3.16138	1.26395e-05	1.22312	2.70281e-06	14	15	21	0	0	0	4.532	7.086	7.85	0	0	0	hypothetical protein
MSMEG_5613	-2.98958	1.27081e-05	2.5457	2.71946e-06	27	38	29	1	0	1	8.741	17.95	10.84	0.749	0	0.675	probable conserved transmembrane protein
MSMEG_1395	-1.8024	1.28543e-05	4.58055	2.75479e-06	233	195	157	6	23	20	75.429	92.113	58.687	4.496	18.344	13.499	lipoprotein, putative
MSMEG_2708	4.33305	1.29753e-05	-0.0460349	2.78479e-06	3	2	0	3	11	16	0.971	0.945	0	2.248	8.773	10.8	hypothetical protein
MSMEG_5901	-2.14368	1.31844e-05	3.66509	2.8338e-06	68	62	78	2	6	4	22.014	29.287	29.157	1.499	4.785	2.7	K02066 phospholipid/cholesterol/gamma-HCH transport system permease protein
MSMEG_5728	-1.63556	1.36068e-05	3.96826	2.93099e-06	143	111	137	12	13	8	46.293	52.433	51.211	8.992	10.368	5.4	K16842 allantoinase [EC:3.5.2.5]
MSMEG_1340	-2.72322	1.38328e-05	4.34666	2.98401e-06	63	48	82	1	4	2	20.395	22.674	30.652	0.749	3.19	1.35	K27071 meromycolic acid (3R)-3-hydroxyacyl-[acyl carrier protein] dehydratase HadA [EC:4.2.1.-]
MSMEG_0588	2.05828	1.39125e-05	2.52157	3.00558e-06	13	8	8	10	10	12	4.208	3.779	2.99	7.493	7.976	8.1	K06610 MFS transporter, SP family, inositol transporter
MSMEG_3866	2.73516	1.40287e-05	1.98297	3.03508e-06	6	5	9	6	11	24	1.942	2.362	3.364	4.496	8.773	16.199	conserved hypothetical protein
MSMEG_2632	1.60173	1.4185e-05	3.51417	3.07112e-06	39	32	21	29	22	22	12.625	15.116	7.85	21.731	17.546	14.849	SAM-dependent methyltransferase
MSMEG_6194	-3.13199	1.4439e-05	2.57612	3.1329e-06	81	71	56	2	2	1	26.222	33.538	20.933	1.499	1.595	0.675	K17836 beta-lactamase class A [EC:3.5.2.6]
MSMEG_6945	-2.2737	1.44792e-05	4.26583	3.14618e-06	77	72	91	4	5	3	24.927	34.011	34.016	2.997	3.988	2.025	K03536 ribonuclease P protein component [EC:3.1.26.5]
MSMEG_6008	1.60598	1.50762e-05	3.66375	3.28298e-06	24	13	17	14	14	15	7.769	6.141	6.355	10.491	11.166	10.125	K00626 acetyl-CoA C-acetyltransferase [EC:2.3.1.9]
MSMEG_0750	-2.26493	1.5392e-05	3.97339	3.35659e-06	51	37	50	1	4	2	16.51	17.478	18.69	0.749	3.19	1.35	K03975 membrane-associated protein
MSMEG_1242	-1.5916	1.56114e-05	5.82628	3.41178e-06	217	150	177	15	13	19	70.249	70.856	66.163	11.24	10.368	12.824	K04487 cysteine desulfurase [EC:2.8.1.7]
MSMEG_4937	-1.72361	1.56114e-05	4.56803	3.41128e-06	101	73	85	6	5	9	32.697	34.483	31.773	4.496	3.988	6.075	K02115 F-type H+-transporting ATPase subunit gamma
MSMEG_1929	-1.81935	1.56367e-05	4.38645	3.41976e-06	104	86	108	14	5	5	33.668	40.624	40.371	10.491	3.988	3.375	conserved hypothetical protein
MSMEG_1705	2.42412	1.5667e-05	3.16669	3.42885e-06	16	7	10	11	12	27	5.18	3.307	3.738	8.243	9.571	18.224	K10548 putative multiple sugar transport system ATP-binding protein [EC:7.5.2.-]
MSMEG_6161	-1.99202	1.57308e-05	4.06563	3.44527e-06	113	70	112	3	10	7	36.581	33.066	41.866	2.248	7.976	4.725	IS1096, tnpA protein
MSMEG_6686	1.60325	1.60561e-05	3.15823	3.52407e-06	33	24	32	31	30	15	10.683	11.337	11.962	23.23	23.927	10.125	K00252 glutaryl-CoA dehydrogenase [EC:1.3.8.6]
MSMEG_4134	-3.1332	1.6245e-05	3.56655	3.56808e-06	104	71	75	4	7	0	33.668	33.538	28.035	2.997	5.583	0	pseudogene
MSMEG_4874	2.24675	1.62892e-05	1.71886	3.58291e-06	10	4	5	5	9	10	3.237	1.889	1.869	3.747	7.178	6.75	putative acyl-CoA dehydrogenase
MSMEG_5439	-1.91734	1.65414e-05	5.01645	3.64356e-06	154	141	165	5	11	19	49.854	66.604	61.677	3.747	8.773	12.824	K21688 resuscitation-promoting factor RpfB
MSMEG_1023	-2.25033	1.67747e-05	3.78058	3.69758e-06	133	93	136	7	7	5	43.056	43.931	50.837	5.245	5.583	3.375	integral membrane transporter
MSMEG_2314	-2.0654	1.69459e-05	4.80693	3.7433e-06	154	137	148	4	15	11	49.854	64.715	55.323	2.997	11.963	7.425	putative esterase family protein
MSMEG_0985	-1.94513	1.70615e-05	3.57894	3.77151e-06	64	51	63	4	3	4	20.719	24.091	23.55	2.997	2.393	2.7	K03761 MFS transporter, MHS family, alpha-ketoglutarate permease
MSMEG_6142	-2.92799	1.74386e-05	4.28833	3.86308e-06	115	69	97	2	2	5	37.229	32.594	36.259	1.499	1.595	3.375	K01784 UDP-glucose 4-epimerase [EC:5.1.3.2]
MSMEG_4194	-1.95289	1.74749e-05	4.44203	3.87386e-06	152	119	156	5	9	17	49.207	56.212	58.313	3.747	7.178	11.475	K06153 undecaprenyl-diphosphatase [EC:3.6.1.27]
MSMEG_0368	-2.26161	1.7804e-05	3.63499	3.95241e-06	55	36	46	4	1	2	17.805	17.005	17.195	2.997	0.798	1.35	hypothetical protein
MSMEG_1443	-3.00368	1.83258e-05	2.35409	4.07975e-06	47	35	53	1	1	1	15.215	16.533	19.812	0.749	0.798	0.675	K02878 large subunit ribosomal protein L16
MSMEG_3197	-1.92472	1.83816e-05	4.59891	4.09793e-06	115	80	122	8	4	10	37.229	37.79	45.604	5.995	3.19	6.75	lipase
MSMEG_6230	-1.89834	1.86007e-05	5.29456	4.1497e-06	247	170	180	5	14	33	79.961	80.303	67.284	3.747	11.166	22.274	probable acyltransferase
MSMEG_0803	-2.11086	1.86097e-05	3.1594	4.15755e-06	55	43	53	2	3	3	17.805	20.312	19.812	1.499	2.393	2.025	hypothetical protein
MSMEG_0778	-2.01782	1.86608e-05	4.59767	4.17268e-06	105	70	77	3	4	10	33.991	33.066	28.783	2.248	3.19	6.75	K03710 GntR family transcriptional regulator
MSMEG_3148	-1.72508	1.87389e-05	4.96763	4.19817e-06	185	147	142	8	10	22	59.89	69.439	53.08	5.995	7.976	14.849	conserved hypothetical protein
MSMEG_4625	-3.68194	1.9052e-05	3.34751	4.27131e-06	40	46	70	0	0	4	12.949	21.729	26.166	0	0	2.7	K02888 large subunit ribosomal protein L21
MSMEG_6940	-3.12622	1.92488e-05	2.38285	4.31845e-06	44	27	31	0	1	1	14.244	12.754	11.588	0	0.798	0.675	K03501 16S rRNA (guanine527-N7)-methyltransferase [EC:2.1.1.170]
MSMEG_0246	-1.59965	1.93682e-05	4.46779	4.34828e-06	178	156	150	7	14	25	57.624	73.69	56.07	5.245	11.166	16.874	sensor-type histidine kinase PrrB
MSMEG_2939	-2.30603	1.97314e-05	3.07158	4.43601e-06	34	33	44	1	1	3	11.007	15.588	16.447	0.749	0.798	2.025	K08681 pyridoxal 5'-phosphate synthase pdxT subunit [EC:4.3.3.6]
MSMEG_6803	1.70132	1.98565e-05	3.98915	4.47036e-06	32	28	36	22	35	27	10.359	13.226	13.457	16.486	27.914	18.224	K10553 fructose transport system permease protein
MSMEG_3809	-3.04483	2.03842e-05	2.24621	4.59876e-06	17	19	33	0	1	0	5.503	8.975	12.335	0	0.798	0	conserved hypothetical protein
MSMEG_1440	-3.06698	2.04861e-05	3.26991	4.62496e-06	84	52	67	0	3	5	27.193	24.563	25.045	0	2.393	3.375	K02965 small subunit ribosomal protein S19
MSMEG_1485	-1.98668	2.10022e-05	4.5406	4.75796e-06	111	105	113	4	10	8	35.934	49.599	42.24	2.997	7.976	5.4	K01265 methionyl aminopeptidase [EC:3.4.11.18]
MSMEG_5917	-2.70187	2.11562e-05	2.71265	4.8028e-06	113	73	88	5	6	1	36.581	34.483	32.895	3.747	4.785	0.675	conserved hypothetical protein
MSMEG_3660	-2.8524	2.14141e-05	2.1906	4.87143e-06	48	30	39	2	2	0	15.539	14.171	14.578	1.499	1.595	0	conserved hypothetical protein TIGR00026
MSMEG_0221	-2.78998	2.17973e-05	1.59721	4.96203e-06	17	11	10	0	0	0	5.503	5.196	3.738	0	0	0	K06889 uncharacterized protein
MSMEG_6824	-3.08038	2.22707e-05	1.44795	5.07678e-06	33	15	21	0	0	1	10.683	7.086	7.85	0	0	0.675	MarR-family protein regulatory protein
MSMEG_1872	-1.96983	2.23242e-05	3.97697	5.10298e-06	81	72	67	3	6	5	26.222	34.011	25.045	2.248	4.785	3.375	K14956 ESAT-6 family protein
MSMEG_1884	-3.19737	2.23242e-05	3.63257	5.10021e-06	50	48	70	1	0	5	16.186	22.674	26.166	0.749	0	3.375	conserved hypothetical protein
MSMEG_1131	1.99096	2.25094e-05	6.99531	5.15589e-06	201	106	171	136	183	180	65.069	50.071	63.92	101.911	145.952	121.495	K05770 translocator protein
MSMEG_5274	-2.08639	2.25094e-05	4.07988	5.15576e-06	56	61	68	2	3	6	18.129	28.815	25.419	1.499	2.393	4.05	K08289 phosphoribosylglycinamide formyltransferase 2 [EC:6.3.1.21]
MSMEG_6372	-2.57309	2.2519e-05	3.28498	5.16164e-06	34	42	44	1	1	2	11.007	19.84	16.447	0.749	0.798	1.35	membrane protein
MSMEG_6403	-1.89452	2.2684e-05	4.88738	5.20302e-06	111	70	88	4	5	10	35.934	33.066	32.895	2.997	3.988	6.75	galactofuranosylgalactofuranosylrhamnosyl-N-acetylglucosaminyl-diphospho-decaprenol beta-1,5/1,6-galactofuranosyltransferase [EC:2.4.1.288]
MSMEG_2527	-2.96729	2.26981e-05	0.994665	5.2098e-06	33	18	14	0	0	1	10.683	8.503	5.233	0	0	0.675	hypothetical protein
MSMEG_1299	-3.35583	2.30164e-05	1.51905	5.2937e-06	58	35	49	1	0	2	18.776	16.533	18.316	0.749	0	1.35	oxidoreductase, 2OG-Fe(II) oxygenase family protein
MSMEG_1144	-2.04099	2.34659e-05	1.37567	5.40076e-06	66	53	62	4	5	2	21.366	25.036	23.176	2.997	3.988	1.35	K02067 phospholipid/cholesterol/gamma-HCH transport system substrate-binding protein
MSMEG_1765	-2.47135	2.40625e-05	3.05483	5.54563e-06	51	25	36	1	1	2	16.51	11.809	13.457	0.749	0.798	1.35	restriction endonuclease family protein
MSMEG_1265	-2.19243	2.4251e-05	4.23743	5.59734e-06	85	61	75	3	3	6	27.517	28.815	28.035	2.248	2.393	4.05	conserved hypothetical protein
MSMEG_1260	-1.96538	2.43534e-05	4.23892	5.62795e-06	132	91	100	4	7	11	42.732	42.986	37.38	2.997	5.583	7.425	hypothetical protein
MSMEG_6649	-2.76272	2.4912e-05	3.03928	5.76877e-06	34	29	30	1	0	2	11.007	13.699	11.214	0.749	0	1.35	conserved hypothetical protein
MSMEG_1540	-3.2161	2.52975e-05	2.71038	5.86306e-06	22	24	29	0	1	0	7.122	11.337	10.84	0	0.798	0	ATP-dependent RNA helicase
MSMEG_3203	-2.41526	2.53191e-05	3.0362	5.87495e-06	63	48	53	2	1	5	20.395	22.674	19.812	1.499	0.798	3.375	K05834 homoserine/homoserine lactone efflux protein
MSMEG_3512	-1.76908	2.54977e-05	4.5159	5.9244e-06	116	84	91	5	7	10	37.552	39.679	34.016	3.747	5.583	6.75	competence damage-inducible protein A
MSMEG_5887	-3.50133	2.54977e-05	2.2055	5.92313e-06	61	53	44	0	1	2	19.747	25.036	16.447	0	0.798	1.35	intersectin-EH binding protein Ibp1
MSMEG_5592	-3.52206	2.60258e-05	2.23747	6.06751e-06	43	18	34	1	0	0	13.92	8.503	12.709	0.749	0	0	conserved hypothetical protein
MSMEG_0238	-2.87611	2.60784e-05	2.23982	6.08796e-06	18	22	19	0	1	0	5.827	10.392	7.102	0	0.798	0	K06929 uncharacterized protein
MSMEG_5583	-1.89653	2.60953e-05	4.13822	6.09601e-06	387	167	210	12	23	17	125.283	78.886	78.499	8.992	18.344	11.475	HNH endonuclease
MSMEG_0097	-1.90784	2.61608e-05	4.78389	6.1154e-06	168	128	129	9	14	7	54.386	60.464	48.221	6.744	11.166	4.725	K00344 NADPH:quinone reductase [EC:1.6.5.5]
MSMEG_1693	1.80607	2.63522e-05	2.98113	6.17254e-06	20	17	16	12	19	19	6.475	8.03	5.981	8.992	15.154	12.824	K00239 succinate dehydrogenase flavoprotein subunit [EC:1.3.5.1]
MSMEG_5832	-1.63754	2.65655e-05	4.79206	6.22667e-06	112	78	86	6	5	13	36.258	36.845	32.147	4.496	3.988	8.775	K23264 phosphoribosylformylglycinamidine synthase subunit PurS [EC:6.3.5.3]
MSMEG_3357	-3.53328	2.66003e-05	1.69344	6.239e-06	28	35	31	0	1	0	9.064	16.533	11.588	0	0.798	0	metal-dependent phosphohydrolase, HD subdomain
MSMEG_4037	1.95106	2.68622e-05	3.04283	6.30464e-06	19	13	11	9	15	22	6.151	6.141	4.112	6.744	11.963	14.849	hypothetical protein
MSMEG_3189	-2.14775	2.69382e-05	3.65356	6.32672e-06	37	31	36	1	2	2	11.978	14.644	13.457	0.749	1.595	1.35	K00652 8-amino-7-oxononanoate synthase [EC:2.3.1.47]
MSMEG_6804	1.78841	2.71759e-05	4.23928	6.39533e-06	48	19	21	17	35	27	15.539	8.975	7.85	12.739	27.914	18.224	K10552 fructose transport system substrate-binding protein
MSMEG_2883	1.73786	2.7312e-05	4.23057	6.43594e-06	47	27	33	31	31	32	15.215	12.754	12.335	23.23	24.724	21.599	K00666 fatty-acyl-CoA synthase [EC:6.2.1.-]
MSMEG_4307	-1.856	2.7312e-05	4.86068	6.43309e-06	128	97	91	7	6	9	41.437	45.82	34.016	5.245	4.785	6.075	conserved hypothetical protein
MSMEG_4984	-3.15078	2.76248e-05	2.46449	6.5183e-06	42	21	43	0	1	1	13.597	9.92	16.074	0	0.798	0.675	conserved hypothetical protein, putative
MSMEG_6304	2.38868	2.7963e-05	3.17604	6.60249e-06	18	4	8	11	22	8	5.827	1.889	2.99	8.243	17.546	5.4	DNA ligase
MSMEG_2316	-2.84643	2.80047e-05	2.16256	6.61673e-06	17	22	19	1	0	0	5.503	10.392	7.102	0.749	0	0	pseudogene
MSMEG_0770	-3.26042	2.81538e-05	3.31169	6.65638e-06	47	30	42	0	5	0	15.215	14.171	15.7	0	3.988	0	hypothetical protein
MSMEG_0108	-2.17059	2.81899e-05	3.49298	6.66934e-06	74	47	52	3	1	7	23.956	22.201	19.438	2.248	0.798	4.725	acyl-CoA dehydrogenase
MSMEG_3353	-2.86727	2.84944e-05	2.11093	6.75478e-06	26	18	25	0	2	0	8.417	8.503	9.345	0	1.595	0	hypothetical protein
MSMEG_6454	-3.08229	2.86852e-05	2.86182	6.81803e-06	61	37	35	1	0	3	19.747	17.478	13.083	0.749	0	2.025	conserved hypothetical protein
MSMEG_5222	-2.83092	2.90983e-05	3.71409	6.92991e-06	46	37	47	2	0	3	14.891	17.478	17.569	1.499	0	2.025	K06942 ribosome-binding ATPase
MSMEG_4663	2.04184	2.91965e-05	2.58638	6.95788e-06	13	10	15	13	10	20	4.208	4.724	5.607	9.742	7.976	13.499	K03337 5-deoxy-glucuronate isomerase [EC:5.3.1.30]
MSMEG_0457	-1.96478	2.92333e-05	3.74072	6.97122e-06	64	61	48	5	4	2	20.719	28.815	17.943	3.747	3.19	1.35	K02470 DNA gyrase subunit B [EC:5.6.2.2]
MSMEG_1441	-3.41605	2.93818e-05	2.29964	7.01587e-06	48	34	41	1	1	0	15.539	16.061	15.326	0.749	0.798	0	K02890 large subunit ribosomal protein L22
MSMEG_5567	1.88711	3.02591e-05	3.14232	7.24432e-06	24	9	25	15	18	21	7.769	4.251	9.345	11.24	14.356	14.174	transcriptional regulator, TetR family protein
MSMEG_1651	-2.09546	3.03405e-05	4.99656	7.26858e-06	138	108	114	10	3	11	44.674	51.016	42.614	7.493	2.393	7.425	K00641 homoserine O-acetyltransferase/O-succinyltransferase [EC:2.3.1.31 2.3.1.46]
MSMEG_6245	-2.55793	3.1023e-05	1.66422	7.43696e-06	32	15	22	1	0	1	10.359	7.086	8.224	0.749	0	0.675	K18553 MFS transporter, DHA1 family, chloramphenicol resistance protein
MSMEG_4686	-2.30999	3.12183e-05	4.12443	7.49356e-06	113	78	85	3	2	13	36.581	36.845	31.773	2.248	1.595	8.775	K05275 pyridoxine 4-dehydrogenase [EC:1.1.1.65]
MSMEG_1272	-1.81405	3.17148e-05	3.83047	7.62768e-06	82	61	87	5	5	6	26.546	28.815	32.521	3.747	3.988	4.05	putative ribosylglycohydrolase
MSMEG_2728	-2.24635	3.18333e-05	3.96372	7.66118e-06	85	63	100	1	7	8	27.517	29.759	37.38	0.749	5.583	5.4	K10008 glutamate transport system ATP-binding protein [EC:7.4.2.1]
MSMEG_6097	-2.70005	3.19776e-05	3.24632	7.70091e-06	23	12	17	0	0	1	7.446	5.668	6.355	0	0	0.675	K01918 pantoate--beta-alanine ligase [EC:6.3.2.1]
MSMEG_2680	-2.8275	3.25734e-05	2.10425	7.85532e-06	32	33	33	0	2	1	10.359	15.588	12.335	0	1.595	0.675	amino acid transporter
MSMEG_4986	-1.99553	3.25734e-05	3.45741	7.85972e-06	119	77	77	4	7	6	38.524	36.373	28.783	2.997	5.583	4.05	glycosyl transferase, family protein 39
MSMEG_2200	-1.81814	3.27504e-05	4.54416	7.90758e-06	87	70	69	4	5	7	28.164	33.066	25.792	2.997	3.988	4.725	K01433 formyltetrahydrofolate deformylase [EC:3.5.1.10]
MSMEG_2354	2.51731	3.34405e-05	2.15333	8.09518e-06	15	3	9	10	12	15	4.856	1.417	3.364	7.493	9.571	10.125	oxidoreductase
MSMEG_1167	1.72554	3.36626e-05	4.22901	8.16478e-06	57	35	39	56	39	26	18.453	16.533	14.578	41.963	31.105	17.549	cytochrome P450
MSMEG_4424	-2.63188	3.36626e-05	1.9199	8.15968e-06	18	13	18	0	0	1	5.827	6.141	6.728	0	0	0.675	endoribonuclease L-PSP
MSMEG_0551	-3.0573	3.41205e-05	1.86948	8.28656e-06	37	20	23	0	0	2	11.978	9.447	8.597	0	0	1.35	K15555 sulfonate transport system ATP-binding protein [EC:7.6.2.14]
MSMEG_4515	-2.63368	3.49735e-05	1.98288	8.50469e-06	66	40	42	1	2	2	21.366	18.895	15.7	0.749	1.595	1.35	K04788 mycobactin phenyloxazoline synthetase
MSMEG_3713	-3.38767	3.55585e-05	2.20696	8.65811e-06	32	21	31	0	1	0	10.359	9.92	11.588	0	0.798	0	hypothetical protein
MSMEG_5857	2.55335	3.71854e-05	1.50897	9.0659e-06	7	4	3	6	7	9	2.266	1.889	1.121	4.496	5.583	6.075	putative oxidoreductase
MSMEG_2365	-1.86879	3.738e-05	4.41868	9.11922e-06	73	63	57	5	5	3	23.632	29.759	21.307	3.747	3.988	2.025	K02433 aspartyl-tRNA(Asn)/glutamyl-tRNA(Gln) amidotransferase subunit A [EC:6.3.5.6 6.3.5.7]
MSMEG_6075	-1.85894	3.78165e-05	4.04002	9.2613e-06	78	49	63	5	7	2	25.251	23.146	23.55	3.747	5.583	1.35	K01770 2-C-methyl-D-erythritol 2,4-cyclodiphosphate synthase [EC:4.6.1.12]
MSMEG_5413	-2.02082	3.81038e-05	3.8842	9.34362e-06	110	85	72	5	5	6	35.61	40.152	26.914	3.747	3.988	4.05	K01524 exopolyphosphatase / guanosine-5'-triphosphate,3'-diphosphate pyrophosphatase [EC:3.6.1.11]
MSMEG_2436	-2.34157	3.85778e-05	3.03328	9.47196e-06	35	28	37	2	1	1	11.33	13.226	13.831	1.499	0.798	0.675	K06960 uncharacterized protein
MSMEG_6125	-2.48925	3.88071e-05	2.75349	9.54044e-06	31	21	25	0	2	1	10.036	9.92	9.345	0	1.595	0.675	transcriptional regulatory protein
MSMEG_2024	2.16322	3.92354e-05	1.3298	9.65804e-06	8	11	6	9	10	10	2.59	5.196	2.243	6.744	7.976	6.75	K01640 hydroxymethylglutaryl-CoA lyase [EC:4.1.3.4]
MSMEG_5420	-2.25558	3.92927e-05	3.61867	9.67831e-06	81	61	76	3	3	5	26.222	28.815	28.409	2.248	2.393	3.375	K16301 deferrochelatase/peroxidase EfeB [EC:1.11.1.-]
MSMEG_5984	2.30078	3.99152e-05	2.10963	9.85043e-06	6	5	7	8	8	8	1.942	2.362	2.617	5.995	6.38	5.4	undecaprenyl-phosphate galactosephosphotransferase
MSMEG_0017	-2.92684	4.06793e-05	1.76512	1.00518e-05	28	23	21	0	2	0	9.064	10.865	7.85	0	1.595	0	K02021 putative ABC transport system ATP-binding protein
MSMEG_0782	-1.97888	4.08238e-05	4.14056	1.00939e-05	86	82	98	6	7	4	27.841	38.734	36.633	4.496	5.583	2.7	aminotransferase class-III
MSMEG_1813	-1.73985	4.09446e-05	5.2945	1.01302e-05	177	130	185	14	13	11	57.3	61.408	69.154	10.491	10.368	7.425	K27094 propionyl-/long chain acyl-CoA carboxylase carboxyl transferase subunit beta 5 [EC:6.4.1.-]
MSMEG_0616	-2.98928	4.21358e-05	1.37661	1.04513e-05	26	14	24	0	1	0	8.417	6.613	8.971	0	0.798	0	K27085 ESX secretion system ATPase EccB
MSMEG_6639	-2.22297	4.26105e-05	2.96737	1.05758e-05	46	33	44	2	1	3	14.891	15.588	16.447	1.499	0.798	2.025	transcriptional regulator, GntR family protein, putative
MSMEG_2091	-2.76235	4.2937e-05	2.43717	1.06703e-05	22	31	27	1	0	1	7.122	14.644	10.093	0.749	0	0.675	K03664 SsrA-binding protein
MSMEG_1745	-3.08123	4.31242e-05	2.08663	1.07235e-05	52	30	64	1	1	1	16.834	14.171	23.923	0.749	0.798	0.675	transcriptional regulator
MSMEG_0617	-3.35577	4.32578e-05	2.38494	1.07635e-05	66	64	58	2	0	3	21.366	30.232	21.681	1.499	0	2.025	K27086 ESX secretion system protein EccC
MSMEG_2788	-2.34294	4.35425e-05	3.00966	1.08549e-05	33	29	39	1	1	2	10.683	13.699	14.578	0.749	0.798	1.35	K06916 cell division protein ZapE
MSMEG_5893	-1.8619	4.3686e-05	3.39239	1.08975e-05	53	34	52	3	2	4	17.158	16.061	19.438	2.248	1.595	2.7	K18481 Mce-associated membrane protein
MSMEG_2363	-1.91173	4.44516e-05	3.88003	1.11094e-05	50	52	54	4	2	4	16.186	24.563	20.185	2.997	1.595	2.7	amino acid-binding ACT
MSMEG_6501	2.71531	4.49526e-05	2.05668	1.12558e-05	11	8	9	15	24	13	3.561	3.779	3.364	11.24	19.141	8.775	hypothetical protein
MSMEG_5643	-2.63354	4.56952e-05	2.84382	1.14489e-05	83	59	70	3	5	1	26.869	27.87	26.166	2.248	3.988	0.675	conserved hypothetical protein
MSMEG_0580	-2.75581	4.57394e-05	3.44074	1.14671e-05	34	37	57	0	3	2	11.007	17.478	21.307	0	2.393	1.35	conserved hypothetical protein
MSMEG_6133	2.56094	4.5949e-05	1.03632	1.15269e-05	3	2	2	4	3	5	0.971	0.945	0.748	2.997	2.393	3.375	K01707 5-dehydro-4-deoxyglucarate dehydratase [EC:4.2.1.41]
MSMEG_1814	-2.95741	4.61427e-05	3.50306	1.159e-05	55	39	61	2	1	1	17.805	18.423	22.802	1.499	0.798	0.675	hypothetical protein
MSMEG_5165	3.44223	4.6454e-05	0.58519	1.16754e-05	1	2	1	3	8	4	0.324	0.945	0.374	2.248	6.38	2.7	integral membrane protein
MSMEG_3905	-2.8196	4.65478e-05	2.55001	1.17136e-05	18	11	10	0	0	0	5.827	5.196	3.738	0	0	0	K09764 uncharacterized protein
MSMEG_5778	-3.08649	4.84674e-05	2.72852	1.22195e-05	35	34	35	5	0	0	11.33	16.061	13.083	3.747	0	0	alcohol dehydrogenase, zinc-binding
MSMEG_1339	-3.58761	5.01773e-05	3.18174	1.26978e-05	46	30	55	0	0	3	14.891	14.171	20.559	0	0	2.025	K02913 large subunit ribosomal protein L33
MSMEG_4956	-2.20727	5.04444e-05	3.38682	1.27813e-05	57	51	43	2	1	6	18.453	24.091	16.074	1.499	0.798	4.05	K01733 threonine synthase [EC:4.2.3.1]
MSMEG_6385	-2.33182	5.07244e-05	3.37288	1.28681e-05	41	26	33	1	1	2	13.273	12.282	12.335	0.749	0.798	1.35	K16652 decaprenylphospho-beta-D-erythro-pentofuranosid-2-ulose 2-reductase [EC:1.1.1.333]
MSMEG_2003	-1.67781	5.07426e-05	3.73609	1.28807e-05	79	68	59	6	6	4	25.575	32.121	22.054	4.496	4.785	2.7	IS1096, tnpA protein
MSMEG_6652	1.72313	5.11364e-05	3.29988	1.29967e-05	34	23	34	26	18	39	11.007	10.865	12.709	19.483	14.356	26.324	hypothetical protein
MSMEG_4875	2.92305	5.12362e-05	0.341807	1.30462e-05	1	5	2	5	6	4	0.324	2.362	0.748	3.747	4.785	2.7	putative acyl-CoA dehydrogenase
MSMEG_0678	-2.13132	5.29811e-05	3.20937	1.3532e-05	46	33	47	2	1	4	14.891	15.588	17.569	1.499	0.798	2.7	K01494 dCTP deaminase [EC:3.5.4.13]
MSMEG_2618	-1.83096	5.32806e-05	4.50427	1.36169e-05	94	91	70	4	7	7	30.43	42.986	26.166	2.997	5.583	4.725	K02302 uroporphyrin-III C-methyltransferase / precorrin-2 dehydrogenase
MSMEG_3014	-1.96638	5.34844e-05	3.01114	1.36858e-05	46	31	35	1	4	2	14.891	14.644	13.083	0.749	3.19	1.35	conserved hypothetical protein
MSMEG_1346	-1.65821	5.46954e-05	4.32868	1.40128e-05	83	66	82	4	9	6	26.869	31.177	30.652	2.997	7.178	4.05	K02867 large subunit ribosomal protein L11
MSMEG_0328	1.75254	5.57955e-05	3.24798	1.43209e-05	14	16	26	12	21	16	4.532	7.558	9.719	8.992	16.749	10.8	hypothetical protein
MSMEG_2208	1.78069	5.68536e-05	1.85017	1.46102e-05	10	14	7	10	8	9	3.237	6.613	2.617	7.493	6.38	6.075	acyl-CoA dehydrogenase
MSMEG_6730	-1.67934	5.70364e-05	5.11827	1.46663e-05	140	108	143	6	15	12	45.322	51.016	53.454	4.496	11.963	8.1	K05275 pyridoxine 4-dehydrogenase [EC:1.1.1.65]
MSMEG_6558	2.24551	5.76637e-05	2.27591	1.48366e-05	4	3	9	7	7	5	1.295	1.417	3.364	5.245	5.583	3.375	putative enoyl-CoA hydratase
MSMEG_5185	-2.25581	5.78805e-05	2.89421	1.49014e-05	44	38	43	2	3	1	14.244	17.95	16.074	1.499	2.393	0.675	enoyl-CoA hydratase PaaB
MSMEG_3046	-2.23754	5.80582e-05	4.51924	1.49563e-05	114	101	102	1	9	14	36.905	47.71	38.128	0.749	7.178	9.45	K01956 carbamoyl-phosphate synthase small subunit [EC:6.3.5.5]
MSMEG_4580	-2.67838	5.81181e-05	3.04889	1.49809e-05	45	32	38	1	0	5	14.568	15.116	14.205	0.749	0	3.375	K09710 ribosome-associated protein
MSMEG_1142	-2.35418	5.94422e-05	-0.0880646	1.53501e-05	10	6	12	0	0	0	3.237	2.834	4.486	0	0	0	K02066 phospholipid/cholesterol/gamma-HCH transport system permease protein
MSMEG_5827	-1.82402	6.05151e-05	4.44486	1.56557e-05	123	98	91	10	8	5	39.819	46.292	34.016	7.493	6.38	3.375	glyoxalase family protein
MSMEG_2161	1.61126	6.08453e-05	3.69244	1.57698e-05	17	20	23	11	17	21	5.503	9.447	8.597	8.243	13.558	14.174	pseudogene
MSMEG_2328	-1.84369	6.15552e-05	4.08762	1.59731e-05	78	67	57	5	3	6	25.251	31.649	21.307	3.747	2.393	4.05	K01692 enoyl-CoA hydratase [EC:4.2.1.17]
MSMEG_6381	-2.37693	6.30659e-05	2.75831	1.64047e-05	56	27	41	2	2	1	18.129	12.754	15.326	1.499	1.595	0.675	conserved hypothetical protein
MSMEG_1953	-1.95188	6.36815e-05	4.12764	1.66048e-05	105	88	73	3	8	7	33.991	41.569	27.288	2.248	6.38	4.725	K18958 WhiB family transcriptional regulator, redox-sensing transcriptional regulator
MSMEG_1396	-1.60863	6.40573e-05	3.84471	1.67128e-05	94	74	105	4	9	11	30.43	34.956	39.249	2.997	7.178	7.425	LprB protein
MSMEG_2990	-1.78161	6.46092e-05	3.25843	1.68669e-05	90	84	78	3	10	7	29.136	39.679	29.157	2.248	7.976	4.725	Fe-S protein, radical SAM family protein
MSMEG_1446	-2.73499	6.49401e-05	1.51626	1.69737e-05	31	21	25	0	1	1	10.036	9.92	9.345	0	0.798	0.675	NTP pyrophosphohydrolase
MSMEG_4738	-3.04896	6.49401e-05	2.41481	1.69641e-05	30	19	55	0	1	1	9.712	8.975	20.559	0	0.798	0.675	hypothetical protein
MSMEG_4978	-2.07927	6.58809e-05	2.18519	1.72713e-05	38	24	38	1	2	2	12.302	11.337	14.205	0.749	1.595	1.35	K00955 bifunctional enzyme CysN/CysC [EC:2.7.7.4 2.7.1.25]
MSMEG_5656	2.50081	6.64633e-05	2.43471	1.74344e-05	5	7	8	14	6	12	1.619	3.307	2.99	10.491	4.785	8.1	K15509 sulfopropanediol 3-dehydrogenase [EC:1.1.1.308]
MSMEG_5869	-2.10676	6.67109e-05	2.52139	1.75098e-05	49	31	44	2	1	4	15.863	14.644	16.447	1.499	0.798	2.7	putative short chain dehydrogenase
MSMEG_2982	-2.61362	6.69684e-05	1.35506	1.75879e-05	22	19	30	1	1	0	7.122	8.975	11.214	0.749	0.798	0	K11959 urea transport system substrate-binding protein
MSMEG_2020	-2.15965	6.85532e-05	1.90098	1.80149e-05	28	34	39	1	1	3	9.064	16.061	14.578	0.749	0.798	2.025	pseudogene
MSMEG_4300	2.05644	6.9381e-05	3.76438	1.82448e-05	9	6	8	7	11	8	2.914	2.834	2.99	5.245	8.773	5.4	transcription regulator AmtR
MSMEG_4577	-2.60332	7.09046e-05	2.3728	1.86772e-05	26	18	26	1	0	1	8.417	8.503	9.719	0.749	0	0.675	K25232 fatty acid kinase fatty acid binding subunit
MSMEG_1523	-2.23704	7.22263e-05	3.74128	1.90367e-05	82	52	75	4	5	2	26.546	24.563	28.035	2.997	3.988	1.35	K02986 small subunit ribosomal protein S4
MSMEG_6277	-1.84061	7.24806e-05	3.94755	1.91152e-05	74	58	73	2	5	9	23.956	27.398	27.288	1.499	3.988	6.075	K07009 lipid II isoglutaminyl synthase (glutamine-hydrolysing) [EC:6.3.5.13]
MSMEG_0845	-2.26876	7.40757e-05	3.04263	1.95939e-05	54	65	66	3	4	2	17.481	30.704	24.671	2.248	3.19	1.35	K05569 multicomponent Na+:H+ antiporter subunit E
MSMEG_3583	-3.11666	7.42644e-05	1.36512	1.96671e-05	27	20	22	0	1	0	8.741	9.447	8.224	0	0.798	0	monooxygenase
MSMEG_6195	-1.74432	7.73778e-05	3.56767	2.05402e-05	57	47	48	3	5	3	18.453	22.201	17.943	2.248	3.988	2.025	ion-transporting ATPase
MSMEG_5704	-2.88006	7.78711e-05	2.72311	2.06834e-05	27	31	28	0	1	1	8.741	14.644	10.466	0	0.798	0.675	conserved hypothetical protein
MSMEG_6063	-2.36857	7.84118e-05	3.97854	2.08393e-05	103	97	89	2	6	7	33.344	45.82	33.268	1.499	4.785	4.725	K02015 iron complex transport system permease protein
MSMEG_2938	-1.88342	8.04504e-05	4.12825	2.14316e-05	77	77	89	9	2	8	24.927	36.373	33.268	6.744	1.595	5.4	K10805 acyl-CoA thioesterase II [EC:3.1.2.-]
MSMEG_4411	2.24736	8.22521e-05	2.37032	2.19373e-05	8	8	6	6	12	11	2.59	3.779	2.243	4.496	9.571	7.425	oxidoreductase FAD-binding region
MSMEG_0327	1.59612	8.22607e-05	3.28686	2.19525e-05	25	28	13	17	21	13	8.093	13.226	4.859	12.739	16.749	8.775	aldehyde dehydrogenase
MSMEG_5762	2.49532	8.42007e-05	1.37174	2.25099e-05	6	2	1	3	4	5	1.942	0.945	0.374	2.248	3.19	3.375	zinc-binding oxidoreductase
MSMEG_5535	-2.50846	8.55813e-05	2.85856	2.29461e-05	62	59	72	7	1	2	20.071	27.87	26.914	5.245	0.798	1.35	hypothetical protein
MSMEG_6088	-2.14622	8.74193e-05	2.92247	2.34938e-05	60	37	59	3	2	3	19.424	17.478	22.054	2.248	1.595	2.025	phosphoglycerate mutase
MSMEG_6411	-2.61285	8.75006e-05	1.79416	2.35293e-05	13	9	11	0	0	0	4.208	4.251	4.112	0	0	0	conserved hypothetical protein
MSMEG_1529	-2.13836	8.93832e-05	2.82615	2.41057e-05	40	21	27	1	2	1	12.949	9.92	10.093	0.749	1.595	0.675	K27308 trehalose dimycolate hydrolase
MSMEG_3754	-1.95252	8.94673e-05	4.42522	2.41431e-05	70	62	79	10	4	2	22.661	29.287	29.53	7.493	3.19	1.35	TPR-repeat-containing protein
MSMEG_4476	-2.22739	8.94673e-05	3.10002	2.41564e-05	40	29	34	3	1	1	12.949	13.699	12.709	2.248	0.798	0.675	hypothetical protein
MSMEG_4048	1.89	8.96357e-05	2.39858	2.4216e-05	16	6	10	7	13	11	5.18	2.834	3.738	5.245	10.368	7.425	cyclase
MSMEG_5333	1.72303	8.98782e-05	2.39159	2.42956e-05	9	9	11	9	11	6	2.914	4.251	4.112	6.744	8.773	4.05	hypothetical protein
MSMEG_3071	-1.90617	9.00416e-05	4.42663	2.43631e-05	64	54	71	4	4	4	20.719	25.508	26.54	2.997	3.19	2.7	K00793 riboflavin synthase [EC:2.5.1.9]
MSMEG_6356	-2.38209	9.23102e-05	4.58295	2.50393e-05	180	124	129	1	13	18	58.271	58.574	48.221	0.749	10.368	12.15	K07506 AraC family transcriptional regulator
MSMEG_1145	-2.75372	9.46249e-05	1.53387	2.56826e-05	68	47	64	1	2	3	22.014	22.201	23.923	0.749	1.595	2.025	K02067 phospholipid/cholesterol/gamma-HCH transport system substrate-binding protein
MSMEG_5490	-2.1083	9.73099e-05	3.41614	2.64572e-05	57	43	57	1	6	3	18.453	20.312	21.307	0.749	4.785	2.025	conserved hypothetical protein
MSMEG_4082	-2.07651	9.88149e-05	3.98644	2.69129e-05	61	55	57	4	7	1	19.747	25.98	21.307	2.997	5.583	0.675	K20938 long-chain alkane monooxygenase [EC:1.14.14.28]
MSMEG_3297	-2.09426	9.89963e-05	3.56154	2.69778e-05	41	42	39	2	4	1	13.273	19.84	14.578	1.499	3.19	0.675	transcriptional regulator, CadC
MSMEG_5013	-1.74641	0.000100356	4.38405	2.73956e-05	96	82	99	6	9	6	31.078	38.734	37.006	4.496	7.178	4.05	conserved hypothetical protein
MSMEG_1870	-1.84491	0.000100482	4.30335	2.74614e-05	81	60	68	7	2	7	26.222	28.342	25.419	5.245	1.595	4.725	conserved hypothetical protein
MSMEG_2648	-1.90247	0.000100693	4.17311	2.7535e-05	64	64	72	4	2	9	20.719	30.232	26.914	2.997	1.595	6.075	Sfp-type phosphopantetheinyl transferase
MSMEG_1632	-2.61703	0.000101014	3.34816	2.76386e-05	34	42	38	0	3	2	11.007	19.84	14.205	0	2.393	1.35	hypothetical protein
MSMEG_2241	2.40423	0.000102295	1.86888	2.80532e-05	8	7	6	14	6	12	2.59	3.307	2.243	10.491	4.785	8.1	K18688 3-oxocholest-4-en-26-oate---CoA ligase [EC:6.2.1.42]
MSMEG_3199	-3.5233	0.000103654	6.16967	2.84747e-05	915	547	607	20	18	10	296.211	258.387	226.898	14.987	14.356	6.75	K03517 quinolinate synthase [EC:2.5.1.72]
MSMEG_4267	-3.02659	0.000103654	2.79895	2.84599e-05	37	38	53	0	3	1	11.978	17.95	19.812	0	2.393	0.675	K27109 cytochrome c oxidase subunit IV [EC:7.1.1.9]
MSMEG_6457	-2.59429	0.000103654	1.90761	2.84653e-05	36	22	15	0	1	1	11.654	10.392	5.607	0	0.798	0.675	oxidoreductase molybdopterin binding domain, putative
MSMEG_0437	-1.97483	0.0001037	3.87667	2.85037e-05	54	47	62	4	2	4	17.481	22.201	23.176	2.997	1.595	2.7	K09125 queuosine precursor transporter
MSMEG_5010	1.97946	0.000104452	4.52497	2.87557e-05	34	24	28	54	44	12	11.007	11.337	10.466	40.465	35.092	8.1	conserved hypothetical protein
MSMEG_6731	2.41045	0.000105761	2.4591	2.91531e-05	7	5	13	13	11	10	2.266	2.362	4.859	9.742	8.773	6.75	K16137 TetR/AcrR family transcriptional regulator, transcriptional repressor for nem operon
MSMEG_1527	-2.95645	0.00010611	2.03833	2.92659e-05	21	22	19	1	0	0	6.798	10.392	7.102	0.749	0	0	K06173 tRNA pseudouridine38-40 synthase [EC:5.4.99.12]
MSMEG_0725	-1.95207	0.000106114	2.54052	2.92837e-05	43	31	37	1	2	4	13.92	14.644	13.831	0.749	1.595	2.7	K07497 putative transposase
MSMEG_1064	-2.54374	0.000107031	4.96956	2.95536e-05	317	212	236	8	14	12	102.622	100.143	88.217	5.995	11.166	8.1	K03306 inorganic phosphate transporter, PiT family
MSMEG_4735	-3.02826	0.00010738	1.65244	2.96667e-05	27	14	25	1	0	0	8.741	6.613	9.345	0.749	0	0	conserved hypothetical protein
MSMEG_1528	-2.51761	0.000108766	3.39409	3.00837e-05	33	22	44	0	1	4	10.683	10.392	16.447	0	0.798	2.7	K27358 cutinase-like protein [EC:3.1.1.-]
MSMEG_4996	-1.92315	0.000110487	3.3812	3.05945e-05	38	27	41	2	2	2	12.302	12.754	15.326	1.499	1.595	1.35	K13891 glutathione transport system permease protein
MSMEG_5032	1.97063	0.000112411	3.00652	3.11977e-05	13	20	9	24	9	12	4.208	9.447	3.364	17.984	7.178	8.1	putative transcriptional regulator
MSMEG_1322	-2.86946	0.000112589	3.59407	3.12649e-05	64	55	84	2	0	11	20.719	25.98	31.399	1.499	0	7.425	ErfK/YbiS/YcfS/YnhG family protein
MSMEG_1247	-1.76101	0.000112928	3.55896	3.13767e-05	47	41	40	4	3	2	15.215	19.367	14.952	2.997	2.393	1.35	conserved hypothetical protein
MSMEG_2631	-2.54473	0.00011435	2.89076	3.18133e-05	39	44	27	0	2	3	12.625	20.784	10.093	0	1.595	2.025	K26937 MATE family, multidrug efflux pump
MSMEG_2969	3.31943	0.000115945	0.146896	3.22878e-05	2	2	0	2	9	2	0.647	0.945	0	1.499	7.178	1.35	NADH:flavin oxidoreductase/nadh oxidase
MSMEG_6456	3.29827	0.000116939	1.63712	3.25828e-05	4	1	0	7	3	2	1.295	0.472	0	5.245	2.393	1.35	conserved hypothetical protein
MSMEG_5919	1.67471	0.00011694	2.50587	3.26017e-05	19	9	19	15	13	11	6.151	4.251	7.102	11.24	10.368	7.425	conserved hypothetical protein
MSMEG_4691	-2.82348	0.000118989	4.45461	3.32289e-05	76	77	73	0	3	12	24.603	36.373	27.288	0	2.393	8.1	HNH nuclease
MSMEG_2329	-1.60066	0.000119079	4.27493	3.32727e-05	97	65	76	6	4	11	31.402	30.704	28.409	4.496	3.19	7.425	methyltransferase, UbiE/COQ5 family protein
MSMEG_3035	-1.88213	0.000120267	3.68753	3.36423e-05	70	44	61	3	2	8	22.661	20.784	22.802	2.248	1.595	5.4	K02356 elongation factor P
MSMEG_2589	-2.74169	0.000122321	1.219	3.42937e-05	15	20	19	0	1	0	4.856	9.447	7.102	0	0.798	0	conserved hypothetical protein
MSMEG_1668	1.80823	0.000123562	2.44282	3.46609e-05	9	7	13	8	12	7	2.914	3.307	4.859	5.995	9.571	4.725	pyridoxamine 5'-phosphate oxidase family protein
MSMEG_3817	-2.38633	0.000124856	2.15266	3.50826e-05	20	26	16	0	1	1	6.475	12.282	5.981	0	0.798	0.675	K09146 uncharacterized protein
MSMEG_5978	2.48054	0.000124979	2.08403	3.51369e-05	4	4	4	10	6	4	1.295	1.889	1.495	7.493	4.785	2.7	GlcNAc-PI de-N-acetylase family protein
MSMEG_2650	-2.62883	0.000127246	2.08665	3.5814e-05	23	13	23	0	2	0	7.446	6.141	8.597	0	1.595	0	acyl-CoA dehydrogenase
MSMEG_3753	-1.76162	0.000127672	4.14901	3.5954e-05	95	86	98	4	7	11	30.754	40.624	36.633	2.997	5.583	7.425	K06117 glycerol-1-phosphatase [EC:3.1.3.21]
MSMEG_5417	-2.71725	0.000131707	1.43974	3.7111e-05	9	12	16	0	0	0	2.914	5.668	5.981	0	0	0	hypothetical protein
MSMEG_2804	-1.59275	0.000133092	3.95414	3.75849e-05	92	60	89	8	6	6	29.783	28.342	33.268	5.995	4.785	4.05	two-component system sensor kinase
MSMEG_4275	-1.68293	0.000136261	4.58091	3.86081e-05	75	57	68	3	6	7	24.28	26.925	25.419	2.248	4.785	4.725	K00768 nicotinate-nucleotide--dimethylbenzimidazole phosphoribosyltransferase [EC:2.4.2.21]
MSMEG_0392	-1.69664	0.000138612	4.34846	3.93175e-05	74	54	85	5	5	6	23.956	25.508	31.773	3.747	3.988	4.05	putative glycosyl transferase
MSMEG_5755	-2.69962	0.000142705	3.5886	4.05458e-05	72	88	104	5	1	5	23.308	41.569	38.875	3.747	0.798	3.375	K14231 tRNA Phe
MSMEG_4779	-1.74085	0.000143136	3.40796	4.06906e-05	49	47	46	3	4	3	15.863	22.201	17.195	2.248	3.19	2.025	probable regulatory protein
MSMEG_4142	-2.0025	0.000143314	3.65797	4.07637e-05	49	29	41	1	3	3	15.863	13.699	15.326	0.749	2.393	2.025	transcriptional repressor, TetR family protein, putative
MSMEG_4899	-2.02197	0.000145244	4.03673	4.13811e-05	90	67	76	8	6	2	29.136	31.649	28.409	5.995	4.785	1.35	K01519 XTP/dITP diphosphohydrolase [EC:3.6.1.66]
MSMEG_2920	-2.28235	0.000146535	1.75611	4.17719e-05	30	21	30	1	1	1	9.712	9.92	11.214	0.749	0.798	0.675	aldo/keto reductase
MSMEG_0834	-1.69979	0.000146774	4.2908	4.1863e-05	63	35	66	4	3	5	20.395	16.533	24.671	2.997	2.393	3.375	tuberculin related peptide
MSMEG_4741	-2.04932	0.000147092	3.97345	4.2e-05	74	60	70	5	4	3	23.956	28.342	26.166	3.747	3.19	2.025	K06994 putative drug exporter of the RND superfamily
MSMEG_2411	-1.70763	0.000148129	3.97867	4.23369e-05	63	43	65	6	4	3	20.395	20.312	24.297	4.496	3.19	2.025	conserved integral membrane protein
MSMEG_5392	2.39396	0.000148129	1.66017	4.23426e-05	5	4	2	3	7	6	1.619	1.889	0.748	2.248	5.583	4.05	K01546 potassium-transporting ATPase potassium-binding subunit
MSMEG_4724	-2.73583	0.000153463	2.8718	4.38914e-05	40	21	32	0	1	2	12.949	9.92	11.962	0	0.798	1.35	K13288 oligoribonuclease [EC:3.1.-.-]
MSMEG_0841	-2.89006	0.000155191	2.48218	4.44341e-05	54	28	43	4	0	1	17.481	13.226	16.074	2.997	0	0.675	pseudogene
MSMEG_0727	-2.73763	0.000156208	1.92156	4.47499e-05	22	16	15	1	0	0	7.122	7.558	5.607	0.749	0	0	hypothetical protein
MSMEG_5922	1.70778	0.000156246	2.66637	4.47852e-05	17	11	14	12	8	18	5.503	5.196	5.233	8.992	6.38	12.15	lipid-transfer protein
MSMEG_4351	-3.31779	0.000157222	3.18873	4.50984e-05	137	94	85	3	2	2	44.351	44.403	31.773	2.248	1.595	1.35	K00059 3-oxoacyl-[acyl-carrier protein] reductase [EC:1.1.1.100]
MSMEG_4511	-1.67129	0.000157222	3.48268	4.51144e-05	99	62	86	4	7	9	32.049	29.287	32.147	2.997	5.583	6.075	K04789 mycobactin peptide synthetase MbtE
MSMEG_0078	-2.32217	0.000157961	2.40331	4.53759e-05	46	41	45	1	2	3	14.891	19.367	16.821	0.749	1.595	2.025	K27098 ESX secretion-associated protein EspA/E
MSMEG_6492	-2.47287	0.000159625	1.96018	4.58791e-05	27	24	25	0	2	1	8.741	11.337	9.345	0	1.595	0.675	GAF domain protein, putative
MSMEG_1880	-2.98759	0.000159638	2.38076	4.59077e-05	22	26	28	2	0	0	7.122	12.282	10.466	1.499	0	0	hypothetical alanine arginine proline rich protein
MSMEG_1003	-1.83969	0.000161039	3.79031	4.63359e-05	81	67	65	7	4	4	26.222	31.649	24.297	5.245	3.19	2.7	IS1096, tnpA protein
MSMEG_6715	1.68232	0.000161758	2.09056	4.65681e-05	14	7	9	9	8	8	4.532	3.307	3.364	6.744	6.38	5.4	AP endonuclease, family protein 2
MSMEG_1570	-2.92963	0.000163083	3.06731	4.69752e-05	75	41	57	0	4	3	24.28	19.367	21.307	0	3.19	2.025	carboxylesterase
MSMEG_2353	1.76846	0.000164912	2.99118	4.75539e-05	25	15	18	7	26	27	8.093	7.086	6.728	5.245	20.736	18.224	secreted protein
MSMEG_0264	-2.5494	0.000165847	1.74314	4.78496e-05	9	11	12	0	0	0	2.914	5.196	4.486	0	0	0	transmembrane transport protein
MSMEG_1108	-1.96735	0.000166657	3.53428	4.81093e-05	47	33	39	2	5	1	15.215	15.588	14.578	1.499	3.988	0.675	hydrolase, alpha/beta fold family protein
MSMEG_5945	1.63418	0.000167697	2.46843	4.84885e-05	22	13	18	11	18	15	7.122	6.141	6.728	8.243	14.356	10.125	conserved hypothetical protein
MSMEG_3672	-2.53546	0.000168449	1.29098	4.87322e-05	12	5	17	0	0	0	3.885	2.362	6.355	0	0	0	K03297 small multidrug resistance pump
MSMEG_5575	2.24914	0.000169593	4.75693	4.90899e-05	37	28	20	37	41	29	11.978	13.226	7.476	27.726	32.7	19.574	repressor
MSMEG_2163	-2.54411	0.00016975	2.03911	4.91619e-05	16	13	17	0	1	0	5.18	6.141	6.355	0	0.798	0	aldehyde dehydrogenase
MSMEG_6755	-2.17755	0.000172503	3.24986	5.00135e-05	40	43	26	2	1	2	12.949	20.312	9.719	1.499	0.798	1.35	isoflavone reductase
MSMEG_1509	2.25004	0.000174768	1.27166	5.06976e-05	4	4	2	3	4	6	1.295	1.889	0.748	2.248	3.19	4.05	K16137 TetR/AcrR family transcriptional regulator, transcriptional repressor for nem operon
MSMEG_6944	-2.20606	0.000175087	1.94451	5.08176e-05	19	19	26	0	1	2	6.151	8.975	9.719	0	0.798	1.35	K08998 uncharacterized protein
MSMEG_4790	-2.55774	0.000178599	3.06313	5.18929e-05	33	45	40	2	4	0	10.683	21.257	14.952	1.499	3.19	0	IS1096, tnpA protein
MSMEG_5852	-1.77806	0.000179478	4.23125	5.22328e-05	52	55	56	2	3	8	16.834	25.98	20.933	1.499	2.393	5.4	K01945 phosphoribosylamine---glycine ligase [EC:6.3.4.13]
MSMEG_6711	2.2853	0.000179478	1.62731	5.22144e-05	5	3	4	4	4	9	1.619	1.417	1.495	2.997	3.19	6.075	K08195 MFS transporter, AAHS family, 4-hydroxybenzoate transporter
MSMEG_2791	-2.04437	0.000179715	1.16009	5.23299e-05	28	23	18	1	1	1	9.064	10.865	6.728	0.749	0.798	0.675	pyridoxamine 5'-phosphate oxidase family protein
MSMEG_3416	-3.08604	0.000181624	2.84078	5.29144e-05	37	24	63	2	0	1	11.978	11.337	23.55	1.499	0	0.675	protein of unknown function DUF6, transmembrane, putative
MSMEG_4961	-2.3965	0.000182895	3.48218	5.33133e-05	82	59	74	3	2	5	26.546	27.87	27.661	2.248	1.595	3.375	hypothetical protein
MSMEG_3734	-2.93836	0.000182936	1.30143	5.33539e-05	14	15	13	0	0	0	4.532	7.086	4.859	0	0	0	K14232 tRNA Pro
MSMEG_0202	-2.51255	0.000184322	2.98836	5.38159e-05	47	34	47	0	4	3	15.215	16.061	17.569	0	3.19	2.025	IS1096, tnpA protein
MSMEG_1150	-2.34717	0.000188292	2.90264	5.50046e-05	34	32	48	3	1	1	11.007	15.116	17.943	2.248	0.798	0.675	conserved hypothetical protein
MSMEG_2932	-2.60933	0.000191249	3.48741	5.59285e-05	61	57	53	0	5	5	19.747	26.925	19.812	0	3.988	3.375	K19710 ATP adenylyltransferase [EC:2.7.7.53]
MSMEG_6526	1.8208	0.000191721	3.10533	5.60965e-05	13	4	16	11	9	8	4.208	1.889	5.981	8.243	7.178	5.4	pyridoxamine 5'-phosphate oxidase family protein
MSMEG_0315	-1.73883	0.00019394	3.80078	5.68371e-05	51	39	38	2	6	2	16.51	18.423	14.205	1.499	4.785	1.35	probable conserved transmembrane protein
MSMEG_2905	-3.17007	0.000197149	1.94099	5.79724e-05	42	35	28	1	0	1	13.597	16.533	10.466	0.749	0	0.675	transcriptional regulator
MSMEG_4975	-1.63105	0.000197149	4.30411	5.79427e-05	128	89	109	9	13	6	41.437	42.041	40.744	6.744	10.368	4.05	K07005 uncharacterized protein
MSMEG_1656	-1.77069	0.000198711	3.55362	5.84848e-05	66	52	50	4	2	7	21.366	24.563	18.69	2.997	1.595	4.725	K01142 exodeoxyribonuclease III [EC:3.1.11.2]
MSMEG_4463	-1.75078	0.000199281	4.23546	5.86839e-05	100	58	55	3	4	10	32.373	27.398	20.559	2.248	3.19	6.75	CalR5 protein
MSMEG_0973	-1.79848	0.00020019	3.52015	5.90456e-05	84	67	63	5	3	8	27.193	31.649	23.55	3.747	2.393	5.4	K07399 cytochrome c biogenesis protein
MSMEG_3381	-1.97751	0.000200966	3.30233	5.93281e-05	59	37	50	5	4	1	19.1	17.478	18.69	3.747	3.19	0.675	K01118 FMN-dependent NADH-azoreductase [EC:1.7.1.17]
MSMEG_2645	-1.81929	0.000212162	3.75751	6.28764e-05	77	50	60	9	2	4	24.927	23.619	22.428	6.744	1.595	2.7	conserved hypothetical protein
MSMEG_4571	-2.73413	0.000213716	1.52066	6.34375e-05	14	10	12	0	0	0	4.532	4.724	4.486	0	0	0	K02968 small subunit ribosomal protein S20
MSMEG_1857	2.47182	0.000214202	0.877593	6.36474e-05	5	1	1	3	3	3	1.619	0.472	0.374	2.248	2.393	2.025	transposase IstA protein, putative
MSMEG_5788	-3.03026	0.00021428	1.8781	6.37393e-05	27	11	31	0	0	1	8.741	5.196	11.588	0	0	0.675	integral membrane protein
MSMEG_4994	-2.43016	0.000215011	2.62214	6.40581e-05	58	41	48	1	6	1	18.776	19.367	17.943	0.749	4.785	0.675	flagella membrane glycoprotein 1B, putative
MSMEG_4306	-2.17007	0.000215987	3.9792	6.43828e-05	66	58	55	1	4	6	21.366	27.398	20.559	0.749	3.19	4.05	K07164 uncharacterized protein
MSMEG_5787	-2.22009	0.000216731	2.92309	6.46385e-05	32	34	45	2	1	2	10.359	16.061	16.821	1.499	0.798	1.35	hypothetical protein
MSMEG_0012	-2.12212	0.000217657	1.72465	6.49489e-05	21	15	24	0	1	2	6.798	7.086	8.971	0	0.798	1.35	K23186 iron-siderophore transport system permease protein
MSMEG_3364	-2.35096	0.000218616	1.71476	6.52693e-05	15	15	18	0	2	0	4.856	7.086	6.728	0	1.595	0	K05835 threonine efflux protein
MSMEG_0049	-1.86154	0.000219846	3.27144	6.56711e-05	25	28	33	2	1	2	8.093	13.226	12.335	1.499	0.798	1.35	K06911 quercetin 2,3-dioxygenase [EC:1.13.11.24]
MSMEG_6598	-1.91844	0.000227809	3.28573	6.82998e-05	27	26	31	1	1	3	8.741	12.282	11.588	0.749	0.798	2.025	K00794 6,7-dimethyl-8-ribityllumazine synthase [EC:2.5.1.78]
MSMEG_0263	-2.29136	0.000229412	2.1183	6.88163e-05	18	16	22	1	1	0	5.827	7.558	8.224	0.749	0.798	0	amidohydrolase 3
MSMEG_0628	-2.21822	0.000231785	2.77954	6.96373e-05	17	17	19	1	1	0	5.503	8.03	7.102	0.749	0.798	0	K07045 uncharacterized protein
MSMEG_4891	-2.18531	0.000231828	3.4921	6.96866e-05	29	15	19	0	2	1	9.388	7.086	7.102	0	1.595	0.675	K24126 lipoyl-dependent peroxiredoxin subunit C [EC:1.11.1.28]
MSMEG_0532	-2.78164	0.000232954	1.2587	7.00617e-05	15	8	15	0	0	0	4.856	3.779	5.607	0	0	0	transcriptional regulator, TetR family protein
MSMEG_2964	-2.42313	0.00023478	3.02454	7.07212e-05	43	36	41	0	3	4	13.92	17.005	15.326	0	2.393	2.7	K00759 adenine phosphoribosyltransferase [EC:2.4.2.7]
MSMEG_3997	-2.78261	0.000235967	0.960018	7.1153e-05	20	6	14	0	0	0	6.475	2.834	5.233	0	0	0	regulatory protein
MSMEG_2290	-1.99722	0.0002373	3.40736	7.17038e-05	52	37	56	5	2	2	16.834	17.478	20.933	3.747	1.595	1.35	transcriptional regulator, TetR family protein
MSMEG_5253	1.98238	0.000246657	1.54685	7.48021e-05	8	5	3	3	6	8	2.59	2.362	1.121	2.248	4.785	5.4	conserved hypothetical protein
MSMEG_5792	-1.62768	0.000251064	4.26051	7.62174e-05	76	52	82	8	7	3	24.603	24.563	30.652	5.995	5.583	2.025	conserved hypothetical protein
MSMEG_6675	1.80873	0.000252406	2.62567	7.66642e-05	26	12	13	13	15	18	8.417	5.668	4.859	9.742	11.963	12.15	hypothetical protein
MSMEG_6296	1.65704	0.000255197	2.6835	7.75521e-05	11	13	10	10	9	9	3.561	6.141	3.738	7.493	7.178	6.075	5-exo-alcohol dehydrogenase
MSMEG_3343	-1.81291	0.00025808	3.0362	7.84685e-05	51	27	43	2	2	4	16.51	12.754	16.074	1.499	1.595	2.7	hypothetical protein
MSMEG_2828	-1.8528	0.000259165	3.25561	7.89205e-05	45	43	38	3	3	2	14.568	20.312	14.205	2.248	2.393	1.35	IS1096, tnpA protein
MSMEG_5280	-2.44731	0.000259165	2.22142	7.8883e-05	25	24	25	1	2	0	8.093	11.337	9.345	0.749	1.595	0	cysteine dioxygenase type I superfamily protein
MSMEG_2693	-1.70566	0.000262732	4.16232	8.00481e-05	81	76	62	5	4	8	26.222	35.9	23.176	3.747	3.19	5.4	K03743 nicotinamide-nucleotide amidase [EC:3.5.1.42]
MSMEG_4793	-2.76369	0.000265361	0.423682	8.09322e-05	19	11	26	0	0	1	6.151	5.196	9.719	0	0	0.675	K02067 phospholipid/cholesterol/gamma-HCH transport system substrate-binding protein
MSMEG_4805	-2.03212	0.000272555	4.09404	8.32546e-05	64	40	67	4	2	4	20.719	18.895	25.045	2.997	1.595	2.7	acyl-CoA dehydrogenase
MSMEG_1237	-2.36831	0.000278527	2.71018	8.52537e-05	100	62	82	3	8	2	32.373	29.287	30.652	2.248	6.38	1.35	hypothetical protein
MSMEG_1015	-1.73943	0.000281376	3.64374	8.62138e-05	55	46	50	5	3	3	17.805	21.729	18.69	3.747	2.393	2.025	transcriptional regulator, TetR family protein
MSMEG_1522	-2.67523	0.000283188	2.14974	8.68134e-05	26	24	40	0	2	1	8.417	11.337	14.952	0	1.595	0.675	K02948 small subunit ribosomal protein S11
MSMEG_1812	-2.28839	0.000284149	4.6219	8.71528e-05	97	77	99	5	6	3	31.402	36.373	37.006	3.747	4.785	2.025	K27095 propionyl-/long chain acyl-CoA carboxylase epsilon subunit
MSMEG_3384	-2.12314	0.000284489	1.93879	8.73015e-05	30	30	26	2	1	1	9.712	14.171	9.719	1.499	0.798	0.675	isoflavone reductase
MSMEG_6898	-2.35757	0.000284703	2.92622	8.74567e-05	36	20	31	0	1	4	11.654	9.447	11.588	0	0.798	2.7	hypothetical protein
MSMEG_4693	-1.58573	0.000285327	4.98843	8.77825e-05	151	93	100	14	8	8	48.883	43.931	37.38	10.491	6.38	5.4	conserved hypothetical protein
MSMEG_1947	-2.75355	0.000285877	3.22057	8.79965e-05	41	23	52	1	4	0	13.273	10.865	19.438	0.749	3.19	0	K18917 mycoredoxin [EC:1.20.4.3]
MSMEG_2319	-2.19917	0.000289205	3.54082	8.91571e-05	48	43	40	4	1	2	15.539	20.312	14.952	2.997	0.798	1.35	K02016 iron complex transport system substrate-binding protein
MSMEG_5979	1.8492	0.000289205	2.67482	8.91475e-05	9	11	10	11	13	6	2.914	5.196	3.738	8.243	10.368	4.05	K00978 glucose-1-phosphate cytidylyltransferase [EC:2.7.7.33]
MSMEG_6723	-2.46206	0.000291033	2.70937	8.97665e-05	23	26	27	1	0	2	7.446	12.282	10.093	0.749	0	1.35	conserved hypothetical protein
MSMEG_0409	-1.68667	0.000296166	4.76121	9.13962e-05	104	78	86	2	9	16	33.668	36.845	32.147	1.499	7.178	10.8	K23156 mycolipenoyl-CoA---2-(long-chain-fatty acyl)-trehalose mycolipenoyltransferase
MSMEG_5258	-1.96427	0.000299461	3.84431	9.246e-05	49	30	41	1	5	2	15.863	14.171	15.326	0.749	3.988	1.35	K01822 steroid Delta-isomerase [EC:5.3.3.1]
MSMEG_6447	-2.53635	0.000300084	0.713838	9.27948e-05	8	15	10	0	0	0	2.59	7.086	3.738	0	0	0	K27089 ESX secretion-associated protein EspC/F
MSMEG_0331	-2.08117	0.000309694	1.47887	9.59593e-05	31	25	27	2	1	1	10.036	11.809	10.093	1.499	0.798	0.675	transcriptional regulator, LuxR family protein
MSMEG_5163	-1.72223	0.000314956	3.18203	9.76888e-05	61	46	55	2	3	9	19.747	21.729	20.559	1.499	2.393	6.075	K02002 glycine betaine/proline transport system substrate-binding protein
MSMEG_0909	-1.644	0.000319569	4.50733	9.93702e-05	80	46	66	4	6	5	25.898	21.729	24.671	2.997	4.785	3.375	acyl-ACP thioesterase superfamily protein
MSMEG_1380	-2.45946	0.000320754	2.00846	9.97889e-05	20	7	19	0	1	0	6.475	3.307	7.102	0	0.798	0	transcriptional regulator
MSMEG_2482	1.70863	0.000322404	2.1951	0.000100454	14	8	13	14	9	8	4.532	3.779	4.859	10.491	7.178	5.4	hypothetical protein
MSMEG_2350	-2.20921	0.000332851	2.25025	0.000103918	19	19	25	2	1	0	6.151	8.975	9.345	1.499	0.798	0	conserved hypothetical protein
MSMEG_3626	-2.29895	0.000335536	1.95467	0.000104862	12	11	16	0	1	0	3.885	5.196	5.981	0	0.798	0	K01429 urease subunit beta [EC:3.5.1.5]
MSMEG_1029	-1.65483	0.000335775	4.03098	0.000104989	49	55	63	3	4	6	15.863	25.98	23.55	2.248	3.19	4.05	probable transcriptional regulatory protein
MSMEG_1008	-2.29921	0.000336439	2.06686	0.000105285	17	15	26	0	1	1	5.503	7.086	9.719	0	0.798	0.675	conserved hypothetical protein
MSMEG_3697	-2.83244	0.000336439	2.99228	0.000105302	37	41	53	2	3	0	11.978	19.367	19.812	1.499	2.393	0	IS1096, tnpA protein
MSMEG_4316	1.86585	0.000341039	1.56032	0.000106932	8	3	7	7	6	4	2.59	1.417	2.617	5.245	4.785	2.7	K00567 methylated-DNA-[protein]-cysteine S-methyltransferase [EC:2.1.1.63]
MSMEG_3019	-1.90535	0.000342283	4.00345	0.000107453	48	43	59	1	8	3	15.539	20.312	22.054	0.749	6.38	2.025	conserved hypothetical protein
MSMEG_5909	1.77006	0.000347147	2.24588	0.000109089	17	11	12	12	7	20	5.503	5.196	4.486	8.992	5.583	13.499	oxidoreductase
MSMEG_2834	-2.88438	0.000351247	2.0645	0.000110433	9	14	20	0	0	0	2.914	6.613	7.476	0	0	0	K14222 tRNA Cys
MSMEG_1896	2.15452	0.000357111	1.30983	0.000112389	6	5	6	8	8	5	1.942	2.362	2.243	5.995	6.38	3.375	K00626 acetyl-CoA C-acetyltransferase [EC:2.3.1.9]
MSMEG_2498	-2.754	0.000357686	1.25819	0.000112626	34	23	22	0	0	4	11.007	10.865	8.224	0	0	2.7	conserved hypothetical protein
MSMEG_5994	2.3311	0.000364904	2.61919	0.00011507	22	8	9	25	15	12	7.122	3.779	3.364	18.734	11.963	8.1	K22821 3-oxo-4-pregnene-20-carboxyl-CoA dehydrogenase alpha subunit [EC:1.3.99.-]
MSMEG_2410	-1.97263	0.000365872	4.59207	0.000115433	72	65	97	3	7	5	23.308	30.704	36.259	2.248	5.583	3.375	putative serine-threonine protein kinase
MSMEG_4524	-2.32056	0.000379493	0.731444	0.000120087	8	8	11	0	0	0	2.59	3.779	4.112	0	0	0	K04781 salicylate synthetase [EC:5.4.4.2 4.2.99.21]
MSMEG_3775	-1.99952	0.000387101	3.77335	0.000122617	31	24	33	3	1	1	10.036	11.337	12.335	2.248	0.798	0.675	K00620 glutamate N-acetyltransferase / amino-acid N-acetyltransferase [EC:2.3.1.35 2.3.1.1]
MSMEG_0106	1.79876	0.000397431	1.77632	0.000126378	20	5	12	10	10	11	6.475	2.362	4.486	7.493	7.976	7.425	K02480 two-component system, NarL family, sensor kinase [EC:2.7.13.3]
MSMEG_5297	1.61731	0.000397431	2.68412	0.000126387	17	9	14	7	13	13	5.503	4.251	5.233	5.245	10.368	8.775	K01577 oxalyl-CoA decarboxylase [EC:4.1.1.8]
MSMEG_0397	-1.80035	0.00041577	3.46015	0.000132806	58	36	56	4	8	1	18.776	17.005	20.933	2.997	6.38	0.675	IS1096, tnpA protein
MSMEG_3406	2.28262	0.000416522	1.7669	0.000133177	3	2	4	6	5	2	0.971	0.945	1.495	4.496	3.988	1.35	putative transcriptional regulator, TetR family protein
MSMEG_2215	2.22874	0.000418092	2.19267	0.000133942	4	7	10	10	8	7	1.295	3.307	3.738	7.493	6.38	4.725	AMP-binding enzyme
MSMEG_4299	-1.98113	0.000418387	5.23141	0.000134102	48	45	57	7	1	3	15.539	21.257	21.307	5.245	0.798	2.025	K15866 2-(1,2-epoxy-1,2-dihydrophenyl)acetyl-CoA isomerase [EC:5.3.3.18]
MSMEG_3215	-2.72829	0.000420394	3.82615	0.000134877	69	66	73	0	6	6	22.337	31.177	27.288	0	4.785	4.05	K02013 iron complex transport system ATP-binding protein [EC:7.2.2.-]
MSMEG_1823	-2.16193	0.000428423	3.92612	0.000137789	30	24	39	0	3	3	9.712	11.337	14.578	0	2.393	2.025	conserved hypothetical protein
MSMEG_2800	-2.28622	0.000429954	2.01803	0.000138349	22	22	23	0	1	2	7.122	10.392	8.597	0	0.798	1.35	K00299 FMN reductase [EC:1.5.1.38]
MSMEG_6404	-2.24616	0.000432689	2.37479	0.000139297	20	14	20	1	1	0	6.475	6.613	7.476	0.749	0.798	0	K01854 UDP-galactopyranose mutase [EC:5.4.99.9]
MSMEG_5451	-2.49765	0.00043971	2.20594	0.000141764	40	34	29	3	0	2	12.949	16.061	10.84	2.248	0	1.35	alkylated DNA repair protein
MSMEG_0753	-2.76922	0.000450643	2.48799	0.000145642	26	27	43	2	0	1	8.417	12.754	16.074	1.499	0	0.675	conserved hypothetical protein
MSMEG_2777	-2.44133	0.00045411	3.74187	0.000146977	35	38	60	5	0	3	11.33	17.95	22.428	3.747	0	2.025	alpha/beta hydrolase fold
MSMEG_5378	-1.85898	0.000462672	3.16121	0.000150111	42	30	45	1	4	3	13.597	14.171	16.821	0.749	3.19	2.025	IS1096, tnpA protein
MSMEG_2536	-2.2772	0.000463127	1.3868	0.000150395	18	16	22	0	1	1	5.827	7.558	8.224	0	0.798	0.675	K00059 3-oxoacyl-[acyl-carrier protein] reductase [EC:1.1.1.100]
MSMEG_1655	-1.88018	0.000464268	3.4873	0.00015092	45	53	59	6	1	5	14.568	25.036	22.054	4.496	0.798	3.375	hydrolase, alpha/beta fold family protein, putative
MSMEG_0341	-2.36748	0.000469522	1.67039	0.000152801	26	24	21	0	1	2	8.417	11.337	7.85	0	0.798	1.35	conserved hypothetical protein
MSMEG_3790	-1.92844	0.000469522	3.03854	0.000152849	46	50	56	1	6	4	14.891	23.619	20.933	0.749	4.785	2.7	K03437 RNA methyltransferase, TrmH family
MSMEG_0223	-1.79142	0.000475454	2.35452	0.000154929	26	20	22	1	1	2	8.417	9.447	8.224	0.749	0.798	1.35	conserved hypothetical protein
MSMEG_3581	-2.2147	0.000477416	2.4321	0.000155643	43	30	30	1	3	1	13.92	14.171	11.214	0.749	2.393	0.675	FabG protein
MSMEG_2340	-1.84716	0.000485649	3.09428	0.000158633	50	39	48	1	7	3	16.186	18.423	17.943	0.749	5.583	2.025	hypothetical protein
MSMEG_6352	-2.06547	0.000491982	2.3794	0.000160855	13	17	19	0	1	1	4.208	8.03	7.102	0	0.798	0.675	conserved hypothetical protein
MSMEG_6143	-2.55831	0.000495834	2.94537	0.000162348	37	32	22	3	1	0	11.978	15.116	8.224	2.248	0.798	0	conserved hypothetical protein
MSMEG_5985	2.05109	0.000498538	2.36026	0.00016339	9	3	12	5	14	7	2.914	1.417	4.486	3.747	11.166	4.725	K01784 UDP-glucose 4-epimerase [EC:5.1.3.2]
MSMEG_3770	-1.88723	0.000498945	4.06584	0.000163601	84	40	62	2	3	9	27.193	18.895	23.176	1.499	2.393	6.075	K01940 argininosuccinate synthase [EC:6.3.4.5]
MSMEG_0337	-1.73374	0.00050028	2.69503	0.000164222	58	31	39	3	2	4	18.776	14.644	14.578	2.248	1.595	2.7	conserved hypothetical protein
MSMEG_2952	1.78581	0.00050028	2.13268	0.000164274	8	7	5	6	6	6	2.59	3.307	1.869	4.496	4.785	4.05	K03761 MFS transporter, MHS family, alpha-ketoglutarate permease
MSMEG_0485	-2.19452	0.000506056	1.73264	0.000166251	11	12	13	1	0	0	3.561	5.668	4.859	0.749	0	0	K01426 amidase [EC:3.5.1.4]
MSMEG_5007	-2.50903	0.000506624	2.70437	0.000166517	24	24	31	0	1	2	7.769	11.337	11.588	0	0.798	1.35	LprB protein
MSMEG_3792	-2.36815	0.000509017	1.04482	0.000167543	13	11	17	0	1	0	4.208	5.196	6.355	0	0.798	0	K02916 large subunit ribosomal protein L35
MSMEG_5841	-2.00733	0.000511508	3.9237	0.000168523	68	46	64	6	6	1	22.014	21.729	23.923	4.496	4.785	0.675	K01923 phosphoribosylaminoimidazole-succinocarboxamide synthase [EC:6.3.2.6]
MSMEG_1119	-2.49605	0.000512311	1.53513	0.000168868	14	16	25	0	2	0	4.532	7.558	9.345	0	1.595	0	K07010 putative glutamine amidotransferase
MSMEG_3628	-2.59264	0.000526202	2.65037	0.00017386	28	30	15	0	1	1	9.064	14.171	5.607	0	0.798	0.675	K19222 1,4-dihydroxy-2-naphthoyl-CoA hydrolase [EC:3.1.2.28]
MSMEG_0843	-2.48018	0.000527789	2.47872	0.000174467	34	14	31	2	0	1	11.007	6.613	11.588	1.499	0	0.675	K05571 multicomponent Na+:H+ antiporter subunit G
MSMEG_2288	-2.27852	0.000529418	1.93637	0.000175171	19	15	22	0	1	1	6.151	7.086	8.224	0	0.798	0.675	conserved hypothetical protein
MSMEG_4661	2.01049	0.000529602	2.55002	0.000175315	14	12	9	7	13	20	4.532	5.668	3.364	5.245	10.368	13.499	K03338 5-dehydro-2-deoxygluconokinase [EC:2.7.1.92]
MSMEG_0789	-2.61488	0.000533705	2.6037	0.000176925	32	18	35	1	2	0	10.359	8.503	13.083	0.749	1.595	0	K00788 thiamine-phosphate pyrophosphorylase [EC:2.5.1.3]
MSMEG_1888	-2.03944	0.000534365	1.34374	0.000177227	11	9	12	0	1	0	3.561	4.251	4.486	0	0.798	0	methyltransferase
MSMEG_2476	-2.40279	0.000537568	1.65252	0.000178458	15	10	17	0	1	0	4.856	4.724	6.355	0	0.798	0	MarR family protein transcriptional regulatory protein
MSMEG_6697	-1.90079	0.000538609	3.12163	0.000178888	35	30	39	2	2	2	11.33	14.171	14.578	1.499	1.595	1.35	IS1096, tnpA protein
MSMEG_5711	-2.70631	0.000549707	1.47929	0.000183178	20	17	25	0	0	2	6.475	8.03	9.345	0	0	1.35	oxidoreductase, short chain dehydrogenase/reductase family protein
MSMEG_0239	-1.95297	0.000550167	3.64836	0.000183418	41	73	59	3	3	4	13.273	34.483	22.054	2.248	2.393	2.7	K01740 O-acetylhomoserine (thiol)-lyase [EC:2.5.1.49]
MSMEG_0576	-2.51761	0.000561666	3.84864	0.000187516	82	73	81	4	4	2	26.546	34.483	30.278	2.997	3.19	1.35	K06994 putative drug exporter of the RND superfamily
MSMEG_3958	-2.6739	0.000569716	2.16202	0.000190382	27	23	24	0	0	4	8.741	10.865	8.971	0	0	2.7	glyoxalase/bleomycin resistance protein/dioxygenase
MSMEG_5198	-2.25953	0.000575658	2.19001	0.000192548	43	21	33	0	4	2	13.92	9.92	12.335	0	3.19	1.35	K08299 crotonobetainyl-CoA hydratase [EC:4.2.1.149]
MSMEG_6753	-2.1445	0.000585965	3.60298	0.000196088	84	42	48	1	3	7	27.193	19.84	17.943	0.749	2.393	4.725	oxidoreductase, short chain dehydrogenase/reductase family protein
MSMEG_4181	-1.7047	0.000586427	3.41167	0.000196334	39	30	30	2	5	1	12.625	14.171	11.214	1.499	3.988	0.675	K01523 phosphoribosyl-ATP pyrophosphohydrolase [EC:3.6.1.31]
MSMEG_4767	-2.76663	0.000602354	2.49488	0.000202915	20	14	20	1	0	0	6.475	6.613	7.476	0.749	0	0	major facilitator superfamily protein permease
MSMEG_0473	-2.18076	0.000628627	0.305553	0.000212534	6	8	11	0	0	0	1.942	3.779	4.112	0	0	0	transcriptional regulator, LuxR family protein
MSMEG_4650	2.35924	0.000628721	2.50252	0.000212664	8	14	12	16	14	15	2.59	6.613	4.486	11.99	11.166	10.125	K00010 myo-inositol 2-dehydrogenase / D-chiro-inositol 1-dehydrogenase [EC:1.1.1.18 1.1.1.369]
MSMEG_2537	-2.25589	0.000633916	1.71829	0.000214819	36	22	21	0	2	2	11.654	10.392	7.85	0	1.595	1.35	transporter protein
MSMEG_6553	-1.80495	0.000634033	3.04986	0.000214958	70	66	67	1	9	9	22.661	31.177	25.045	0.749	7.178	6.075	K14699 ATP-binding cassette, subfamily B, bacterial IrtB/YbtQ [EC:7.-.-.-]
MSMEG_2496	-1.64503	0.000637521	2.93506	0.000216341	49	50	59	2	5	6	15.863	23.619	22.054	1.499	3.988	4.05	NAD-binding protein
MSMEG_3914	-1.89839	0.000637521	1.74039	0.000216261	31	21	30	3	1	1	10.036	9.92	11.214	2.248	0.798	0.675	beta-lactamase
MSMEG_2906	-2.65519	0.000639807	2.02287	0.000217217	41	23	24	0	2	1	13.273	10.865	8.971	0	1.595	0.675	conserved hypothetical protein
MSMEG_1714	2.45318	0.000647118	0.827009	0.000220004	2	2	2	2	3	5	0.647	0.945	0.748	1.499	2.393	3.375	K03077 L-ribulose-5-phosphate 4-epimerase [EC:5.1.3.4]
MSMEG_5431	-2.70412	0.000649818	2.70109	0.000221024	30	25	35	0	2	1	9.712	11.809	13.083	0	1.595	0.675	K02897 large subunit ribosomal protein L25
MSMEG_6576	-1.98534	0.00065002	1.95507	0.000221194	35	32	44	2	2	2	11.33	15.116	16.447	1.499	1.595	1.35	pyridoxamine 5'-phosphate oxidase family protein
MSMEG_6094	-1.82543	0.000651801	3.53682	0.000221903	44	37	33	1	4	3	14.244	17.478	12.335	0.749	3.19	2.025	K04567 lysyl-tRNA synthetase, class II [EC:6.1.1.6]
MSMEG_6891	-1.86931	0.000664761	2.67035	0.000226419	63	25	55	1	4	5	20.395	11.809	20.559	0.749	3.19	3.375	pseudogene
MSMEG_5191	-1.68236	0.000665928	3.24676	0.000226921	38	36	35	2	2	4	12.302	17.005	13.083	1.499	1.595	2.7	siderophore binding protein
MSMEG_6028	1.96196	0.000670097	2.2531	0.000228658	10	7	9	10	6	12	3.237	3.307	3.364	7.493	4.785	8.1	transcriptional regulator, LysR family protein
MSMEG_5837	-1.72154	0.000675912	2.65793	0.000230853	29	22	26	1	2	2	9.388	10.392	9.719	0.749	1.595	1.35	K00432 glutathione peroxidase [EC:1.11.1.9]
MSMEG_6037	1.68325	0.000688404	2.33647	0.000235444	10	10	14	11	7	11	3.237	4.724	5.233	8.243	5.583	7.425	K16050 4,5:9,10-diseco-3-hydroxy-5,9,17-trioxoandrosta-1(10),2-diene-4-oate hydrolase [EC:3.7.1.17]
MSMEG_6647	-2.46129	0.000689468	0.200619	0.000235916	19	8	18	1	0	0	6.151	3.779	6.728	0.749	0	0	K01647 citrate synthase [EC:2.3.3.1]
MSMEG_1226	-1.63351	0.000691954	1.91332	0.000236876	34	26	26	2	2	2	11.007	12.282	9.719	1.499	1.595	1.35	K13444 formylglycine-generating enzyme [EC:1.8.3.7]
MSMEG_4412	2.76256	0.00071211	1.785	0.000244446	12	2	3	3	13	14	3.885	0.945	1.121	2.248	10.368	9.45	oxidoreductase, molybdopterin binding
MSMEG_4271	-2.39521	0.000718984	3.53817	0.000246918	83	53	76	7	2	2	26.869	25.036	28.409	5.245	1.595	1.35	conserved hypothetical protein
MSMEG_1954	-2.30987	0.000784949	4.36419	0.000271666	102	87	93	3	3	10	33.02	41.096	34.764	2.248	2.393	6.75	ABC1 family protein
MSMEG_4090	-1.68098	0.000785861	2.59841	0.000272417	30	15	32	2	1	2	9.712	7.086	11.962	1.499	0.798	1.35	putative IclR family protein transcriptional regulator
MSMEG_6471	-2.28441	0.000796735	3.10527	0.000276679	25	34	40	2	1	1	8.093	16.061	14.952	1.499	0.798	0.675	glycine/D-amino acid oxidase
MSMEG_6462	-1.69821	0.000796752	3.09791	0.000277126	49	48	51	3	3	5	15.863	22.674	19.064	2.248	2.393	3.375	IS1096, tnpA protein
MSMEG_2373	-2.47591	0.000806504	3.41401	0.000281277	74	60	57	0	8	6	23.956	28.342	21.307	0	6.38	4.05	K01653 acetolactate synthase I/III small subunit [EC:2.2.1.6]
MSMEG_0830	-1.63379	0.000808329	3.42475	0.00028204	37	30	39	1	2	7	11.978	14.171	14.578	0.749	1.595	4.725	K22476 N-acetylglutamate synthase [EC:2.3.1.1]
MSMEG_5990	1.59591	0.000819258	2.72671	0.000286239	19	9	25	12	14	14	6.151	4.251	9.345	8.992	11.166	9.45	K25623 17-hydroxy-3-oxo-4-pregnene-20-carboxyl-CoA lyase [EC:4.1.3.-]
MSMEG_0338	-2.57626	0.000835079	1.84296	0.000292422	42	23	19	2	1	0	13.597	10.865	7.102	1.499	0.798	0	acyl-CoA dehydrogenase fadE12
MSMEG_4969	1.89169	0.000840943	1.81006	0.000294739	8	8	15	12	13	6	2.59	3.779	5.607	8.992	10.368	4.05	two-component system response regulator
MSMEG_4341	-2.08239	0.000862026	1.18721	0.000302534	17	8	9	0	0	1	5.503	3.779	3.364	0	0	0.675	hypothetical protein
MSMEG_5576	1.94331	0.000881059	5.91798	0.000309905	77	35	71	65	56	61	24.927	16.533	26.54	48.708	44.663	41.173	K00045 mannitol 2-dehydrogenase [EC:1.1.1.67]
MSMEG_2764	-2.23049	0.000886174	3.23012	0.000312096	24	23	17	2	1	0	7.769	10.865	6.355	1.499	0.798	0	probable conserved alanine rich transmembrane protein
MSMEG_3427	2.38874	0.00088962	0.853476	0.000313754	5	4	3	4	5	9	1.619	1.889	1.121	2.997	3.988	6.075	metal dependent hydrolase
MSMEG_0514	2.10602	0.000913538	1.32979	0.000322476	6	4	4	3	10	5	1.942	1.889	1.495	2.248	7.976	3.375	K07406 alpha-galactosidase [EC:3.2.1.22]
MSMEG_3759	-1.73309	0.000919261	3.24441	0.00032464	29	25	20	1	1	3	9.388	11.809	7.476	0.749	0.798	2.025	K03652 DNA-3-methyladenine glycosylase [EC:3.2.2.21]
MSMEG_1336	-1.65	0.000925795	2.89031	0.000327383	22	27	35	2	3	1	7.122	12.754	13.083	1.499	2.393	0.675	K05916 nitric oxide dioxygenase [EC:1.14.12.17]
MSMEG_0927	-2.08335	0.000926715	3.1812	0.000327854	46	39	45	2	1	5	14.891	18.423	16.821	1.499	0.798	3.375	conserved hypothetical protein
MSMEG_1650	-1.7903	0.000927014	2.61125	0.000328105	25	19	24	1	1	2	8.093	8.975	8.971	0.749	0.798	1.35	methyltransferase type 11
MSMEG_2381	-2.16304	0.000933625	2.46257	0.000330592	18	15	18	1	0	1	5.827	7.086	6.728	0.749	0	0.675	conserved hypothetical protein
MSMEG_0256	-1.61385	0.000939442	2.72096	0.000332799	34	20	26	3	2	1	11.007	9.447	9.719	2.248	1.595	0.675	conserved hypothetical protein
MSMEG_1701	-2.12915	0.000953419	1.95343	0.0003379	19	12	15	0	0	3	6.151	5.668	5.607	0	0	2.025	K03783 purine-nucleoside phosphorylase [EC:2.4.2.1]
MSMEG_4995	-2.67632	0.000974597	2.4261	0.000346017	36	22	30	1	0	2	11.654	10.392	11.214	0.749	0	1.35	K13890 glutathione transport system permease protein
MSMEG_0413	-1.68615	0.000985095	2.9458	0.000350363	19	23	22	1	1	2	6.151	10.865	8.224	0.749	0.798	1.35	conserved hypothetical protein
MSMEG_4255	-2.68826	0.00100838	1.72404	0.000360067	18	17	16	0	0	1	5.827	8.03	5.981	0	0	0.675	conserved hypothetical protein
MSMEG_0941	-1.67702	0.00101688	4.29642	0.000363264	49	63	48	2	3	9	15.863	29.759	17.943	1.499	2.393	6.075	AP endonuclease, family protein 2
MSMEG_5194	-1.78165	0.0010183	3.03523	0.000363931	55	25	40	5	1	3	17.805	11.809	14.952	3.747	0.798	2.025	integral membrane protein
MSMEG_2295	-1.66731	0.00103994	3.79314	0.000372805	49	39	60	5	1	8	15.863	18.423	22.428	3.747	0.798	5.4	transcriptional regulator, TetR family protein
MSMEG_1147	-2.06689	0.00108087	0.25392	0.000388834	21	18	18	0	2	1	6.798	8.503	6.728	0	1.595	0.675	K02067 phospholipid/cholesterol/gamma-HCH transport system substrate-binding protein
MSMEG_2130	-2.33904	0.00108501	1.44819	0.000390496	28	15	16	1	0	1	9.064	7.086	5.981	0.749	0	0.675	K00257 acyl-ACP dehydrogenase [EC:1.3.99.-]
MSMEG_6931	-2.14141	0.00109685	0.622912	0.000395443	8	10	6	0	0	0	2.59	4.724	2.243	0	0	0	K03088 RNA polymerase sigma-70 factor, ECF subfamily
MSMEG_4945	-1.69778	0.00109697	3.15171	0.00039566	33	34	44	2	4	2	10.683	16.061	16.447	1.499	3.19	1.35	IS1096, tnpA protein
MSMEG_1143	-1.62957	0.00109819	1.19848	0.00039627	37	18	27	2	3	1	11.978	8.503	10.093	1.499	2.393	0.675	K02067 phospholipid/cholesterol/gamma-HCH transport system substrate-binding protein
MSMEG_1557	-2.24853	0.00112789	3.03474	0.000407519	48	24	30	5	0	2	15.539	11.337	11.214	3.747	0	1.35	K02996 small subunit ribosomal protein S9
MSMEG_1991	1.74539	0.00114256	2.68482	0.000413	11	8	5	8	8	5	3.561	3.779	1.869	5.995	6.38	3.375	isovaleryl-CoA dehydrogenase
MSMEG_0765	-2.32712	0.00116462	1.72497	0.000421703	12	11	17	0	1	0	3.885	5.196	6.355	0	0.798	0	zinc finger, UBP-type
MSMEG_3676	-1.6845	0.00116719	2.76184	0.00042282	57	58	55	2	5	7	18.453	27.398	20.559	1.499	3.988	4.725	phenoxybenzoate dioxygenase beta subunit
MSMEG_4087	-1.63055	0.00117754	2.6434	0.000426752	21	15	15	1	1	1	6.798	7.086	5.607	0.749	0.798	0.675	major facilitator superfamily protein
MSMEG_3407	-1.88188	0.00117933	2.72564	0.000427587	19	12	19	2	0	1	6.151	5.668	7.102	1.499	0	0.675	epoxide hydrolase
MSMEG_1811	-1.95077	0.00119452	4.29182	0.000433841	47	46	54	3	4	2	15.215	21.729	20.185	2.248	3.19	1.35	K06287 nucleoside triphosphate pyrophosphatase [EC:3.6.1.-]
MSMEG_3342	-2.10174	0.00121487	2.52276	0.000441997	32	25	29	3	3	0	10.359	11.809	10.84	2.248	2.393	0	hypothetical protein
MSMEG_1251	-2.5147	0.00124692	3.32669	0.00045408	75	44	68	7	0	6	24.28	20.784	25.419	5.245	0	4.05	conserved hypothetical protein
MSMEG_5905	2.59029	0.00124692	0.201899	0.000454245	4	1	3	5	2	7	1.295	0.472	1.121	3.747	1.595	4.725	hypothetical protein
MSMEG_0802	-1.72043	0.00126037	3.1586	0.000459736	42	25	47	2	2	4	13.597	11.809	17.569	1.499	1.595	2.7	IS1096, tnpA protein
MSMEG_4881	1.8482	0.00126604	1.96466	0.000462201	10	7	5	7	4	11	3.237	3.307	1.869	5.245	3.19	7.425	K01848 methylmalonyl-CoA mutase, N-terminal domain [EC:5.4.99.2]
MSMEG_3863	-2.67371	0.00127841	2.04338	0.000466917	22	19	19	2	0	0	7.122	8.975	7.102	1.499	0	0	K07006 uncharacterized protein
MSMEG_4966	-2.03257	0.00128466	2.35955	0.00047041	31	18	34	0	2	4	10.036	8.503	12.709	0	1.595	2.7	CalU12 protein
MSMEG_1922	-2.17525	0.00129524	2.23317	0.000475096	16	12	14	0	2	0	5.18	5.668	5.233	0	1.595	0	K03786 3-dehydroquinate dehydratase II [EC:4.2.1.10]
MSMEG_2017	-1.75513	0.00129524	4.29045	0.000475037	79	65	64	6	10	2	25.575	30.704	23.923	4.496	7.976	1.35	transcriptional regulator, MerR family protein
MSMEG_0323	-1.71468	0.00130603	2.42825	0.000479874	46	40	37	1	4	5	14.891	18.895	13.831	0.749	3.19	3.375	acyl-CoA dehydrogenase, short-chain specific, putative
MSMEG_1074	-2.09776	0.00131148	2.23766	0.00048229	13	14	13	2	0	0	4.208	6.613	4.859	1.499	0	0	K22278 peptidoglycan-N-acetylglucosamine deacetylase [EC:3.5.1.104]
MSMEG_6703	-2.07199	0.00132263	0.95538	0.000486803	15	12	7	0	0	1	4.856	5.668	2.617	0	0	0.675	N5,N10-methylenetetrahydromethanopterin reductase-related protein
MSMEG_2968	1.99179	0.00133984	0.822599	0.000493995	5	2	2	3	3	3	1.619	0.945	0.748	2.248	2.393	2.025	K09967 uncharacterized protein
MSMEG_4483	-1.67107	0.00134941	4.1606	0.000498776	85	53	70	3	3	15	27.517	25.036	26.166	2.248	2.393	10.125	K01129 dGTPase [EC:3.1.5.1]
MSMEG_4245	-2.08181	0.00135894	1.61165	0.000502729	11	5	7	0	0	0	3.561	2.362	2.617	0	0	0	conserved hypothetical protein
MSMEG_4218	-2.48733	0.00138168	3.05272	0.000511573	24	20	11	0	2	0	7.769	9.447	4.112	0	1.595	0	K02221 YggT family protein
MSMEG_6345	-1.6871	0.0013846	2.3987	0.000513087	30	21	26	1	4	1	9.712	9.92	9.719	0.749	3.19	0.675	conserved hypothetical protein
MSMEG_1045	2.30217	0.00139963	1.4204	0.000519537	1	1	5	5	3	1	0.324	0.472	1.869	3.747	2.393	0.675	integral membrane protein
MSMEG_1115	-1.73395	0.0014005	3.54272	0.000520079	30	24	26	1	1	4	9.712	11.337	9.719	0.749	0.798	2.7	K03183 demethylmenaquinone methyltransferase / 2-methoxy-6-polyprenyl-1,4-benzoquinol methylase
MSMEG_5753	-2.18582	0.00141378	2.18906	0.000525453	49	17	17	1	1	1	15.863	8.03	6.355	0.749	0.798	0.675	serine/threonine specific protein phosphatase
MSMEG_5424	-2.10017	0.001423	3.00398	0.000529326	19	17	32	1	0	3	6.151	8.03	11.962	0.749	0	2.025	transcriptional regulator, TetR family protein
MSMEG_3261	-1.59639	0.0014666	3.57394	0.000546925	59	33	55	3	6	3	19.1	15.588	20.559	2.248	4.785	2.025	conserved hypothetical protein
MSMEG_4317	1.6145	0.00146707	2.50771	0.000547331	10	9	6	5	7	8	3.237	4.251	2.243	3.747	5.583	5.4	K09990 uncharacterized protein
MSMEG_2697	-1.69279	0.00146787	3.13224	0.000547859	30	16	31	2	1	2	9.712	7.558	11.588	1.499	0.798	1.35	conserved hypothetical protein
MSMEG_3329	2.23991	0.00147776	1.69697	0.000552246	4	5	5	5	7	6	1.295	2.362	1.869	3.747	5.583	4.05	hypothetical protein
MSMEG_3901	-2.27962	0.00148814	3.29775	0.000556594	20	12	25	1	0	1	6.475	5.668	9.345	0.749	0	0.675	K06718 L-2,4-diaminobutyric acid acetyltransferase [EC:2.3.1.178]
MSMEG_0960	-2.3428	0.00155059	1.55835	0.000581005	14	7	22	0	0	1	4.532	3.307	8.224	0	0	0.675	putative transmembrane protein
MSMEG_3872	-1.70056	0.00155059	2.72033	0.000581167	24	26	26	2	2	1	7.769	12.282	9.719	1.499	1.595	0.675	K06042 precorrin-8X/cobalt-precorrin-8 methylmutase [EC:5.4.99.61 5.4.99.60]
MSMEG_2499	-2.09637	0.00156922	0.993958	0.000589133	12	4	8	0	0	0	3.885	1.889	2.99	0	0	0	ABC transporter, membrane spanning protein, putative
MSMEG_4175	2.81096	0.00161631	0.357084	0.00060808	0	0	3	1	1	2	0	0	1.121	0.749	0.798	1.35	transcriptional regulator, ArsR family protein
MSMEG_3620	-2.25224	0.00161875	2.94343	0.000609255	30	24	42	1	2	1	9.712	11.337	15.7	0.749	1.595	0.675	conserved hypothetical protein
MSMEG_3379	-2.17015	0.00166172	1.34894	0.000626992	5	8	13	0	0	0	1.619	3.779	4.859	0	0	0	2-deoxy-D-gluconate 3-dehydrogenase
MSMEG_5533	-1.75542	0.00167393	1.55354	0.000632121	6	4	8	0	0	0	1.942	1.889	2.99	0	0	0	4Fe-4S ferredoxin, iron-sulfur binding
MSMEG_2787	-1.94328	0.00167711	2.77111	0.000633851	34	29	18	0	3	3	11.007	13.699	6.728	0	2.393	2.025	putative riboflavin biosynthesis protein RibD
MSMEG_3627	-2.14496	0.00173368	1.55836	0.00065822	13	13	9	1	0	0	4.208	6.141	3.364	0.749	0	0	K01430 urease subunit gamma [EC:3.5.1.5]
MSMEG_4370	-2.16595	0.00173372	1.20643	0.000658511	18	12	7	1	0	0	5.827	5.668	2.617	0.749	0	0	regulatory protein
MSMEG_3693	-1.90555	0.00173417	2.08929	0.000658953	24	19	17	2	2	0	7.769	8.975	6.355	1.499	1.595	0	cytochrome P450 monooxygenase
MSMEG_3475	-1.92347	0.00173497	1.47569	0.000659526	8	10	12	1	0	0	2.59	4.724	4.486	0.749	0	0	conserved hypothetical protein
MSMEG_4997	-1.90329	0.00177425	3.35473	0.000675016	55	24	31	4	1	2	17.805	11.337	11.588	2.997	0.798	1.35	K13892 glutathione transport system ATP-binding protein
MSMEG_0503	-2.23984	0.00178289	0.913386	0.000678583	13	4	10	0	0	0	4.208	1.889	3.738	0	0	0	DeoR-family protein transcriptional regulator
MSMEG_0615	-2.50864	0.00178916	1.50261	0.000681812	14	10	23	0	1	0	4.532	4.724	8.597	0	0.798	0	K27084 ESX secretion system protein EccA
MSMEG_0015	-2.06311	0.00180286	1.52343	0.000687599	16	10	24	0	1	1	5.18	4.724	8.971	0	0.798	0.675	K23188 iron-siderophore transport system ATP-binding protein [EC:7.2.2.17 7.2.2.-]
MSMEG_0052	-1.79102	0.00183011	3.28132	0.000698567	63	49	43	6	1	6	20.395	23.146	16.074	4.496	0.798	4.05	conserved hypothetical protein
MSMEG_0009	-2.43897	0.00183255	2.13614	0.000699786	18	17	29	1	0	1	5.827	8.03	10.84	0.749	0	0.675	hypothetical protein
MSMEG_6243	-2.1595	0.00193465	0.0618016	0.000742417	9	11	5	0	0	0	2.914	5.196	1.869	0	0	0	K09958 uncharacterized protein
MSMEG_3327	2.21513	0.00197262	2.57502	0.000758223	10	6	3	4	7	13	3.237	2.834	1.121	2.997	5.583	8.775	hypothetical protein
MSMEG_2574	-2.0232	0.00197818	2.1714	0.00076098	20	10	13	0	3	0	6.475	4.724	4.859	0	2.393	0	conserved hypothetical protein
MSMEG_3009	1.82881	0.00197888	1.2978	0.000761563	8	5	8	7	8	5	2.59	2.362	2.99	5.245	6.38	3.375	2,5-dichloro-2,5-cyclohexadiene-1,4-diol dehydrogenase
MSMEG_4547	-2.64285	0.00201845	1.35021	0.000779008	16	13	21	0	1	0	5.18	6.141	7.85	0	0.798	0	acyl-CoA dehydrogenase family protein
MSMEG_4770	-1.91304	0.00206957	1.67261	0.000800359	11	11	13	0	0	2	3.561	5.196	4.859	0	0	1.35	K18481 Mce-associated membrane protein
MSMEG_5097	1.79057	0.00206957	1.39486	0.000800193	12	5	3	3	7	7	3.885	2.362	1.121	2.248	5.583	4.725	hypothetical protein
MSMEG_6754	-1.6291	0.00211136	3.29879	0.000818179	32	20	29	3	1	2	10.359	9.447	10.84	2.248	0.798	1.35	MaoC like domain protein
MSMEG_1916	-1.79976	0.00211628	3.27234	0.000820414	39	17	39	2	1	3	12.625	8.03	14.578	1.499	0.798	2.025	hypothetical protein
MSMEG_0502	-2.20703	0.00211839	1.21509	0.000821567	13	11	12	1	0	0	4.208	5.196	4.486	0.749	0	0	K01222 6-phospho-beta-glucosidase [EC:3.2.1.86]
MSMEG_1734	-2.25705	0.00216183	2.03287	0.000840785	29	15	22	1	0	2	9.388	7.086	8.224	0.749	0	1.35	conserved hypothetical protein
MSMEG_6226	2.31229	0.00219669	1.26914	0.000856069	2	2	1	2	3	2	0.647	0.945	0.374	1.499	2.393	1.35	transcriptional regulator, PadR family protein domain protein
MSMEG_3352	-1.7002	0.00227585	0.355725	0.000890487	7	4	6	0	0	0	2.266	1.889	2.243	0	0	0	hypothetical protein
MSMEG_5130	-1.69392	0.00231704	3.52976	0.000908057	32	27	34	1	1	7	10.359	12.754	12.709	0.749	0.798	4.725	bacterial extracellular solute-binding protein, family protein 5
MSMEG_5910	1.86091	0.00232367	1.23284	0.00091102	8	3	2	3	4	4	2.59	1.417	0.748	2.248	3.19	2.7	quinone binding protein
MSMEG_5840	-2.0563	0.00233581	1.55828	0.000916881	9	6	7	0	0	0	2.914	2.834	2.617	0	0	0	conserved hypothetical protein
MSMEG_0116	-2.05722	0.00233732	1.83255	0.000917841	27	18	13	2	0	1	8.741	8.503	4.859	1.499	0	0.675	K10831 taurine transport system ATP-binding protein [EC:7.6.2.7]
MSMEG_4509	-2.15309	0.00236068	1.35035	0.000927384	22	20	18	2	1	0	7.122	9.447	6.728	1.499	0.798	0	K04793 mycobactin lysine-N-oxygenase
MSMEG_5455	2.05342	0.00242146	0.863245	0.00095316	2	1	4	4	1	3	0.647	0.472	1.495	2.997	0.798	2.025	pe family protein
MSMEG_5452	-1.61357	0.00243664	3.07928	0.0009599	29	32	35	2	2	3	9.388	15.116	13.083	1.499	1.595	2.025	conserved hypothetical protein
MSMEG_6295	2.01101	0.00249744	0.537306	0.000986596	2	4	5	5	5	2	0.647	1.889	1.869	3.747	3.988	1.35	shikimate transporter
MSMEG_1706	1.78282	0.00250404	3.33942	0.000990002	22	14	13	6	19	26	7.122	6.613	4.859	4.496	15.154	17.549	K10547 putative multiple sugar transport system permease protein
MSMEG_0220	-1.95505	0.00254255	2.72648	0.00100681	36	29	26	2	1	2	11.654	13.699	9.719	1.499	0.798	1.35	K01054 acylglycerol lipase [EC:3.1.1.23]
MSMEG_6650	2.60534	0.00258931	1.0281	0.00102776	1	5	0	4	1	2	0.324	2.362	0	2.997	0.798	1.35	hypothetical protein
MSMEG_4223	2.15452	0.00259534	0.221396	0.00103097	1	1	2	1	2	2	0.324	0.472	0.748	0.749	1.595	1.35	hypothetical protein
MSMEG_4075	1.59232	0.00260673	1.90844	0.0010359	9	9	10	10	5	8	2.914	4.251	3.738	7.493	3.988	5.4	CoA-binding protein
MSMEG_1066	-2.58739	0.00261503	2.76653	0.00104043	78	50	61	2	2	3	25.251	23.619	22.802	1.499	1.595	2.025	conserved hypothetical protein
MSMEG_5221	-1.66638	0.00272322	3.08088	0.00108775	28	17	30	2	1	2	9.064	8.03	11.214	1.499	0.798	1.35	GCN5-related N-acetyltransferase
MSMEG_1748	-2.15062	0.00275941	1.07947	0.00110307	25	15	21	0	1	2	8.093	7.086	7.85	0	0.798	1.35	K09705 uncharacterized protein
MSMEG_5349	-2.16224	0.00275941	1.24243	0.00110302	12	12	11	0	1	0	3.885	5.668	4.112	0	0.798	0	conserved hypothetical protein, putative
MSMEG_2307	-1.89888	0.00276134	2.26099	0.00110428	9	9	11	0	0	1	2.914	4.251	4.112	0	0	0.675	conserved hypothetical protein
MSMEG_6888	-2.03396	0.00276885	1.37259	0.00110772	14	13	16	0	0	3	4.532	6.141	5.981	0	0	2.025	transposase subunit
MSMEG_3857	-2.05822	0.00279218	2.63938	0.00111749	25	13	19	2	0	1	8.093	6.141	7.102	1.499	0	0.675	conserved hypothetical protein
MSMEG_4949	-2.10398	0.00281145	0.942589	0.00112601	7	5	12	0	0	0	2.266	2.362	4.486	0	0	0	K02493 release factor glutamine methyltransferase [EC:2.1.1.297]
MSMEG_5175	-1.62945	0.00281483	3.02569	0.00112788	26	25	29	1	1	5	8.417	11.809	10.84	0.749	0.798	3.375	K12410 NAD-dependent protein deacetylase/lipoamidase [EC:2.3.1.286 2.3.1.313]
MSMEG_1333	2.03151	0.00283981	1.49216	0.00113913	2	4	6	3	7	3	0.647	1.889	2.243	2.248	5.583	2.025	conserved hypothetical protein
MSMEG_3193	-1.88843	0.00284147	2.76511	0.00114078	34	30	37	4	0	6	11.007	14.171	13.831	2.997	0	4.05	K18476 TetR/AcrR family transcriptional regulator, tetracycline repressor protein
MSMEG_1025	-1.81358	0.00291561	1.62911	0.00117557	16	18	20	1	0	3	5.18	8.503	7.476	0.749	0	2.025	TetR-family protein transcriptional regulator
MSMEG_0811	2.04118	0.00296319	1.53476	0.00119601	6	1	2	2	2	5	1.942	0.472	0.748	1.499	1.595	3.375	oxidoreductase
MSMEG_0277	1.77057	0.00301621	1.34939	0.00122134	7	5	3	5	4	4	2.266	2.362	1.121	3.747	3.19	2.7	putative aminotransferase
MSMEG_0540	-2.20577	0.00302609	1.64073	0.00122582	15	19	15	3	0	0	4.856	8.975	5.607	2.248	0	0	K07734 transcriptional regulator
MSMEG_2822	-2.0912	0.00306877	1.25822	0.00124359	18	5	13	0	0	1	5.827	2.362	4.859	0	0	0.675	pseudogene
MSMEG_3109	1.61281	0.00307718	2.28774	0.00124845	6	8	7	7	8	3	1.942	3.779	2.617	5.245	6.38	2.025	binding-protein-dependent transport systems inner membrane component
MSMEG_1050	-1.80134	0.00307796	3.60493	0.00124924	52	40	50	2	3	5	16.834	18.895	18.69	1.499	2.393	3.375	SAM-dependent methyltransferase
MSMEG_2660	2.00008	0.00311603	2.13455	0.00126616	5	1	4	2	5	3	1.619	0.472	1.495	1.499	3.988	2.025	transcriptional regulator, AsnC family protein
MSMEG_4513	-2.17759	0.00311626	0.0709462	0.00126675	7	6	12	0	0	0	2.266	2.834	4.486	0	0	0	K04790 mycobactin polyketide synthetase MbtC
MSMEG_0596	-2.03637	0.00316406	1.7989	0.00128866	16	10	22	1	1	0	5.18	4.724	8.224	0.749	0.798	0	K05799 GntR family transcriptional regulator, transcriptional repressor for pyruvate dehydrogenase c
MSMEG_2364	-1.95156	0.00317154	2.35275	0.0012922	10	9	11	1	0	0	3.237	4.251	4.112	0.749	0	0	K02435 aspartyl-tRNA(Asn)/glutamyl-tRNA(Gln) amidotransferase subunit C [EC:6.3.5.6 6.3.5.7]
MSMEG_0759	-1.58344	0.00318343	4.59615	0.00129904	98	69	115	11	2	19	31.725	32.594	42.987	8.243	1.595	12.824	K01939 adenylosuccinate synthase [EC:6.3.4.4]
MSMEG_3725	2.93249	0.00319503	0.0988602	0.00130428	4	0	0	1	1	4	1.295	0	0	0.749	0.798	2.7	pqqA; coenzyme PQQ biosynthesis protein A
MSMEG_0018	-1.61906	0.00323502	1.98391	0.00132263	28	24	28	3	1	2	9.064	11.337	10.466	2.248	0.798	1.35	K06148 ATP-binding cassette, subfamily C, bacterial
MSMEG_0303	-1.82677	0.00324204	2.01801	0.00132601	36	26	18	3	1	1	11.654	12.282	6.728	2.248	0.798	0.675	alcohol dehydrogenase, zinc-containing
MSMEG_4749	1.89941	0.0032569	-0.757759	0.0013326	0	0	0	0	0	0	0	0	0	0	0	0	hypothetical protein
MSMEG_3292	-1.71695	0.00327228	0.841979	0.00133941	6	5	6	0	0	0	1.942	2.362	2.243	0	0	0	DNA-binding protein
MSMEG_4292	-1.7854	0.00327245	1.06442	0.00133999	6	5	7	0	0	0	1.942	2.362	2.617	0	0	0	K15977 putative oxidoreductase
MSMEG_0886	-1.62188	0.00332597	3.13237	0.00136451	45	27	36	1	4	4	14.568	12.754	13.457	0.749	3.19	2.7	K08884 serine/threonine protein kinase, bacterial [EC:2.7.11.1]
MSMEG_2923	-1.66642	0.00343101	3.5566	0.00141138	47	28	46	7	1	3	15.215	13.226	17.195	5.245	0.798	2.025	dehydrogenase/reductase SDR family protein member 1
MSMEG_3870	-2.07738	0.00347328	2.08345	0.00142985	12	15	18	0	3	0	3.885	7.086	6.728	0	2.393	0	K22303 alkyl sulfatase [EC:1.14.11.77]
MSMEG_1295	1.92997	0.00351905	2.37695	0.00145367	16	12	18	10	26	14	5.18	5.668	6.728	7.493	20.736	9.45	K07127 5-hydroxyisourate hydrolase [EC:3.5.2.17]
MSMEG_1093	1.89794	0.00359591	0.675914	0.0014888	6	4	3	3	6	4	1.942	1.889	1.121	2.248	4.785	2.7	K14048 urease subunit gamma/beta [EC:3.5.1.5]
MSMEG_2302	-2.07003	0.00365264	0.865104	0.00151569	10	12	11	0	0	1	3.237	5.668	4.112	0	0	0.675	conserved hypothetical protein
MSMEG_6382	-2.35012	0.00366879	3.48521	0.00152358	40	40	55	0	4	5	12.949	18.895	20.559	0	3.19	3.375	K16653 decaprenylphospho-beta-D-ribofuranose 2-oxidase [EC:1.1.98.3]
MSMEG_3336	-2.01824	0.00378347	2.26759	0.00157536	20	21	26	4	1	0	6.475	9.92	9.719	2.997	0.798	0	hydrolase
MSMEG_1482	-1.79073	0.00378623	2.14459	0.0015771	21	15	20	0	2	2	6.798	7.086	7.476	0	1.595	1.35	methyltransferase
MSMEG_0081	-2.14141	0.0038231	0.884434	0.00159426	8	10	6	0	0	0	2.59	4.724	2.243	0	0	0	K27102 ESX secretion-associated protein EspL
MSMEG_4900	-2.15903	0.00383787	4.07955	0.00160102	69	50	55	8	10	0	22.337	23.619	20.559	5.995	7.976	0	Pks14 protein
MSMEG_6487	-1.75568	0.00389339	2.22712	0.00162601	21	13	17	3	0	1	6.798	6.141	6.355	2.248	0	0.675	K03392 aminocarboxymuconate-semialdehyde decarboxylase [EC:4.1.1.45]
MSMEG_4943	-1.72968	0.0040008	3.00694	0.00167464	18	14	23	1	4	0	5.827	6.613	8.597	0.749	3.19	0	conserved hypothetical protein
MSMEG_0624	-1.71146	0.0040228	2.18492	0.00168511	37	32	31	1	5	2	11.978	15.116	11.588	0.749	3.988	1.35	K14743 membrane-anchored mycosin MYCP [EC:3.4.21.-]
MSMEG_0384	-1.99593	0.00405305	3.02124	0.00169905	30	23	37	0	3	4	9.712	10.865	13.831	0	2.393	2.7	K00973 glucose-1-phosphate thymidylyltransferase [EC:2.7.7.24]
MSMEG_6604	-1.78192	0.0040981	1.85396	0.00171987	21	12	14	0	2	1	6.798	5.668	5.233	0	1.595	0.675	transcriptional regulator, TetR family protein
MSMEG_1320	1.61839	0.00422686	1.10978	0.00177921	6	6	13	4	12	5	1.942	2.834	4.859	2.997	9.571	3.375	K08194 MFS transporter, ACS family, D-galactonate transporter
MSMEG_1105	-2.07864	0.0042406	1.16501	0.00178632	10	8	5	0	0	0	3.237	3.779	1.869	0	0	0	pseudogene
MSMEG_3736	-1.86009	0.00424624	2.55333	0.00178937	39	30	34	4	1	2	12.625	14.171	12.709	2.997	0.798	1.35	hypothetical protein
MSMEG_6930	-1.81788	0.00430605	0.937656	0.00181636	7	3	10	0	0	0	2.266	1.417	3.738	0	0	0	hypothetical protein
MSMEG_1369	-1.66809	0.00430645	2.58588	0.00181744	10	5	10	0	0	1	3.237	2.362	3.738	0	0	0.675	K02529 LacI family transcriptional regulator, galactose operon repressor
MSMEG_6749	-1.7854	0.00442542	0.899195	0.00187181	6	5	7	0	0	0	1.942	2.362	2.617	0	0	0	conserved hypothetical protein
MSMEG_6069	-1.84878	0.00450446	1.22805	0.00190737	17	14	18	0	1	2	5.503	6.613	6.728	0	0.798	1.35	CobW/P47K C-domain protein
MSMEG_1584	1.90305	0.00460932	1.79628	0.00195538	10	6	6	23	4	4	3.237	2.834	2.243	17.235	3.19	2.7	hypothetical protein
MSMEG_3318	-1.92354	0.00462931	1.20537	0.00196532	14	5	12	0	0	1	4.532	2.362	4.486	0	0	0.675	oxidoreductase
MSMEG_5376	-2.17654	0.00464479	1.0654	0.00197429	8	8	8	0	0	0	2.59	3.779	2.99	0	0	0	conserved hypothetical protein
MSMEG_5394	1.79048	0.00464479	0.633592	0.0019748	7	2	5	5	3	4	2.266	0.945	1.869	3.747	2.393	2.7	K01548 potassium-transporting ATPase KdpC subunit
MSMEG_5886	-1.85078	0.00475842	1.57254	0.00202685	10	10	8	0	0	1	3.237	4.724	2.99	0	0	0.675	enoyl-CoA hydratase
MSMEG_1330	-2.03646	0.00491854	1.52756	0.00210199	19	17	20	0	1	2	6.151	8.03	7.476	0	0.798	1.35	MarR-family protein transcriptional regulator
MSMEG_4737	-2.12287	0.00495959	2.19569	0.00212343	24	16	19	2	0	1	7.769	7.558	7.102	1.499	0	0.675	conserved hypothetical protein
MSMEG_6282	-2.05809	0.00496203	2.43252	0.00212525	25	14	25	3	0	1	8.093	6.613	9.345	2.248	0	0.675	KanY protein
MSMEG_4812	1.76692	0.00496341	1.15635	0.00212662	11	5	2	5	6	3	3.561	2.362	0.748	3.747	4.785	2.025	respiratory-chain NADH dehydrogenase domain, 51 kda subunit
MSMEG_6261	2.27685	0.00498876	0.899597	0.00213826	2	3	4	7	2	4	0.647	1.417	1.495	5.245	1.595	2.7	K22081 methylamine---glutamate N-methyltransferase subunit A [EC:2.1.1.21]
MSMEG_4923	-1.89922	0.00501769	2.04972	0.00215308	16	13	13	1	1	0	5.18	6.141	4.859	0.749	0.798	0	K07503 endonuclease [EC:3.1.-.-]
MSMEG_4988	-1.67087	0.00501769	2.4821	0.00215536	33	31	35	2	3	2	10.683	14.644	13.083	1.499	2.393	1.35	integral membrane protein
MSMEG_1598	-1.66636	0.0050412	2.0894	0.00216628	15	8	13	1	1	0	4.856	3.779	4.859	0.749	0.798	0	conserved hypothetical protein
MSMEG_4063	-1.87607	0.00505176	2.08728	0.0021724	15	8	21	0	1	1	4.856	3.779	7.85	0	0.798	0.675	K07045 uncharacterized protein
MSMEG_3146	-1.76744	0.00506349	3.92481	0.00217903	38	21	36	0	4	6	12.302	9.92	13.457	0	3.19	4.05	K21474 peptidoglycan DL-endopeptidase RipB [EC:3.4.-.-]
MSMEG_3838	-1.88134	0.00510385	2.97488	0.00220121	31	30	37	0	7	3	10.036	14.171	13.831	0	5.583	2.025	K24131 protease PrsW [EC:3.4.-.-]
MSMEG_5859	2.00472	0.00519782	1.05212	0.00224581	6	3	2	4	6	2	1.942	1.417	0.748	2.997	4.785	1.35	K00128 aldehyde dehydrogenase (NAD+) [EC:1.2.1.3]
MSMEG_0014	-1.88439	0.00522095	0.80567	0.00225755	10	5	5	0	0	0	3.237	2.362	1.869	0	0	0	K00604 methionyl-tRNA formyltransferase [EC:2.1.2.9]
MSMEG_5465	-1.92379	0.00522095	1.36595	0.00225826	14	15	14	1	1	0	4.532	7.086	5.233	0.749	0.798	0	transcriptional regulator, AraC family protein
MSMEG_5319	1.90993	0.00528345	0.496558	0.00228695	7	3	4	2	6	7	2.266	1.417	1.495	1.499	4.785	4.725	alkylhydroperoxidase AhpD core
MSMEG_2500	-2.05763	0.0054005	2.19559	0.00234186	22	9	18	1	0	1	7.122	4.251	6.728	0.749	0	0.675	conserved hypothetical protein
MSMEG_6209	1.97617	0.00541142	2.80216	0.00234744	11	8	3	9	12	3	3.561	3.779	1.121	6.744	9.571	2.025	conserved hypothetical protein
MSMEG_6793	-1.674	0.00545142	1.89113	0.00237121	48	30	37	3	6	1	15.539	14.171	13.831	2.248	4.785	0.675	hypothetical protein
MSMEG_5428	-1.99958	0.00547171	1.66268	0.00238132	11	9	11	1	0	0	3.561	4.251	4.112	0.749	0	0	K00537 arsenate reductase (glutaredoxin) [EC:1.20.4.1]
MSMEG_0842	-1.89286	0.00552023	1.52303	0.00240417	11	14	10	0	2	0	3.561	6.613	3.738	0	1.595	0	hypothetical protein
MSMEG_5321	-2.16619	0.00572872	-0.596309	0.00250707	13	5	7	0	0	0	4.208	2.362	2.617	0	0	0	hypothetical protein
MSMEG_4089	-1.77743	0.0057603	1.30967	0.00252408	8	7	12	1	0	0	2.59	3.307	4.486	0.749	0	0	transposase subunit
MSMEG_4193	-1.83788	0.00588566	2.69151	0.00258548	33	27	24	1	2	2	10.683	12.754	8.971	0.749	1.595	1.35	phosphoglycerate mutase family protein
MSMEG_3053	-2.07293	0.00589292	2.6502	0.00258959	17	20	37	1	4	0	5.503	9.447	13.831	0.749	3.19	0	K03060 DNA-directed RNA polymerase subunit omega [EC:2.7.7.6]
MSMEG_1912	1.76813	0.00610578	1.12636	0.00269175	9	4	5	5	3	9	2.914	1.889	1.869	3.747	2.393	6.075	K03464 muconolactone D-isomerase [EC:5.3.3.4]
MSMEG_5269	-1.62671	0.00616385	1.22612	0.00272122	5	6	5	0	0	0	1.619	2.834	1.869	0	0	0	hypothetical protein
MSMEG_2244	2.32192	0.00618623	0.209366	0.00273305	2	0	2	1	1	3	0.647	0	0.748	0.749	0.798	2.025	Rieske [2Fe-2S] domain protein
MSMEG_4059	-1.9232	0.00623212	0.71968	0.00275527	6	7	7	0	0	0	1.942	3.307	2.617	0	0	0	K01560 2-haloacid dehalogenase [EC:3.8.1.2]
MSMEG_3425	-1.84705	0.0062585	1.89769	0.0027689	16	13	9	3	0	0	5.18	6.141	3.364	2.248	0	0	K21961 TetR/AcrR family transcriptional regulator, ethionamide resistance regulator
MSMEG_5102	-1.76031	0.00656819	2.20815	0.00291931	22	16	31	0	2	4	7.122	7.558	11.588	0	1.595	2.7	ABC transporter ATP-binding protein
MSMEG_1688	2.57637	0.00659859	0.356165	0.00293489	0	1	3	1	4	1	0	0.472	1.121	0.749	3.19	0.675	cupin domain protein
MSMEG_0235	-1.87445	0.00660642	2.85569	0.00294045	25	16	32	4	2	0	8.093	7.558	11.962	2.997	1.595	0	probable conserved membrane protein
MSMEG_2301	-1.83382	0.00660642	0.632836	0.00293972	8	4	7	0	0	0	2.59	1.889	2.617	0	0	0	K07032 uncharacterized protein
MSMEG_0575	-1.98109	0.0066986	1.8458	0.00299094	13	25	19	0	2	1	4.208	11.809	7.102	0	1.595	0.675	MmpS1 protein
MSMEG_1488	1.58523	0.00683451	0.962818	0.00305868	6	2	5	2	5	3	1.942	0.945	1.869	1.499	3.988	2.025	K01652 acetolactate synthase I/II/III large subunit [EC:2.2.1.6]
MSMEG_1027	-1.7669	0.00684752	1.99156	0.00306602	11	12	5	0	1	0	3.561	5.668	1.869	0	0.798	0	conserved hypothetical protein
MSMEG_2090	-1.84542	0.00685148	3.03878	0.00307062	25	23	38	2	1	2	8.093	10.865	14.205	1.499	0.798	1.35	K09811 cell division transport system permease protein
MSMEG_3449	-2.05362	0.00707963	1.46094	0.00318328	25	14	18	0	2	1	8.093	6.613	6.728	0	1.595	0.675	DNA-binding protein
MSMEG_3495	-2.0399	0.00709418	1.4523	0.00319872	5	7	11	0	0	0	1.619	3.307	4.112	0	0	0	MmpS5 protein
MSMEG_6163	1.5919	0.00710209	4.24605	0.00320341	13	18	20	26	15	6	4.208	8.503	7.476	19.483	11.963	4.05	conserved hypothetical protein
MSMEG_4675	-1.69536	0.00710844	0.976266	0.00320739	6	4	7	0	0	0	1.942	1.889	2.617	0	0	0	K14232 tRNA Pro
MSMEG_2125	-1.648	0.00729787	2.9617	0.00330431	40	21	29	4	1	2	12.949	9.92	10.84	2.997	0.798	1.35	glycerol operon regulatory protein
MSMEG_0512	1.65089	0.00741206	1.01382	0.00336299	5	9	2	2	4	6	1.619	4.251	0.748	1.499	3.19	4.05	BadF/BadG/BcrA/BcrD ATPase family protein
MSMEG_1430	-1.71056	0.00757498	1.9155	0.00344285	23	13	24	2	0	3	7.446	6.141	8.971	1.499	0	2.025	transcriptional regulator, TetR family protein
MSMEG_3058	-2.17099	0.00777102	1.62008	0.00354292	12	3	12	0	0	0	3.885	1.417	4.486	0	0	0	K02073 D-methionine transport system substrate-binding protein
MSMEG_1674	1.89941	0.00781835	-1.1594	0.00357063	0	0	0	0	0	0	0	0	0	0	0	0	hypothetical protein
MSMEG_2567	1.68715	0.00784542	1.04504	0.00358506	11	5	12	10	11	4	3.561	2.362	4.486	7.493	8.773	2.7	K03379 cyclohexanone monooxygenase [EC:1.14.13.22]
MSMEG_6005	1.70872	0.00797544	2.24234	0.00364988	6	5	6	8	7	2	1.942	2.362	2.243	5.995	5.583	1.35	conserved hypothetical protein
MSMEG_2318	-1.58805	0.00804622	1.75848	0.00368985	9	6	8	0	0	1	2.914	2.834	2.99	0	0	0.675	GTP cyclohydrolase II
MSMEG_1754	-1.76236	0.00873957	1.94758	0.0040366	24	13	18	2	0	2	7.769	6.141	6.728	1.499	0	1.35	conserved hypothetical protein
MSMEG_6522	-1.89854	0.00892081	1.50867	0.00412731	36	24	24	2	0	6	11.654	11.337	8.971	1.499	0	4.05	K02053 putative spermidine/putrescine transport system permease protein
MSMEG_4676	-1.69646	0.00917274	0.406072	0.00425538	10	4	4	0	0	0	3.237	1.889	1.495	0	0	0	K14225 tRNA Gly
MSMEG_3529	-1.74894	0.0092666	2.82803	0.00430619	31	17	20	3	3	0	10.036	8.03	7.476	2.248	2.393	0	fatty acid hydroxylase
MSMEG_5862	2.02863	0.00934747	0.405522	0.00434671	2	4	6	11	5	1	0.647	1.889	2.243	8.243	3.988	0.675	short chain dehydrogenase
MSMEG_4736	-2.12283	0.00941346	1.59789	0.00438182	12	14	15	2	0	0	3.885	6.613	5.607	1.499	0	0	conserved hypothetical protein
MSMEG_6911	-1.58321	0.00947839	0.875774	0.00441502	7	8	8	1	0	0	2.266	3.779	2.99	0.749	0	0	K02028 polar amino acid transport system ATP-binding protein [EC:7.4.2.1]
MSMEG_1700	-1.58805	0.00961588	1.72762	0.00448359	9	6	8	0	1	0	2.914	2.834	2.99	0	0.798	0	TetR-family protein transcriptional regulator
MSMEG_1581	-1.88913	0.0097226	1.78649	0.00454098	17	6	13	0	0	2	5.503	2.834	4.859	0	0	1.35	conserved hypothetical protein
MSMEG_6496	1.78289	0.00999014	1.2958	0.00468944	2	2	7	5	4	1	0.647	0.945	2.617	3.747	3.19	0.675	K02049 NitT/TauT family transport system ATP-binding protein

## Sheet: WT 2% vs WT 0.1% glucose
Supplementary Table
total RNA sequencing
gene	Log2-transformed Fold Change (Log2FC) values for expression in MSMEG6238/6236 double mutant strain versus wild-type control	False Discovery Rate (FDR)	Log2-transformed Average Expression	p value ↓	raw read count						CPM-transformed values
					WT_1	WT_2	WT_3	MUT_1	MUT_2	MUT_3	WT_1	WT_2	WT_3	MUT_1	MUT_2	MUT_3	annotation
MSMEG_3616	6.87791	1.54834e-23	9.15206	2.42915e-27	223	352	523	5371	3870	4228	93.152	121.851	112.78	2940.07	3118.27	3111.84	integral membrane protein
MSMEG_1361	7.58139	1.71243e-23	9.20899	5.37316e-27	113	142	197	3813	2804	2669	47.202	49.156	42.481	2087.22	2259.34	1964.4	alpha-mannosidase
MSMEG_3254	7.41464	3.45622e-23	10.9682	1.62671e-26	488	536	942	12797	10953	11384	203.848	185.546	203.134	7005.03	8825.43	8378.71	RDD family protein, putative
MSMEG_3255	8.43515	5.54119e-23	11.7592	3.47737e-26	518	486	770	25267	19997	20539	216.379	168.238	166.043	13831.1	16112.7	15116.9	DoxX subfamily protein, putative
MSMEG_3304	8.76898	1.56539e-22	9.57154	1.22795e-25	95	94	147	6382	4624	4641	39.683	32.54	31.699	3493.49	3725.81	3415.81	K00135 succinate-semialdehyde dehydrogenase / glutarate-semialdehyde dehydrogenase [EC:1.2.1.16]
MSMEG_2958	8.64748	1.74756e-22	9.85823	1.64502e-25	114	120	179	6482	5658	5455	47.62	41.54	38.6	3548.22	4558.96	4014.92	conserved hypothetical protein
MSMEG_5542	6.60714	1.79276e-22	10.85	1.96883e-25	663	629	1248	10015	7799	8038	276.949	217.74	269.12	5482.18	6284.08	5916.03	K07729 putative transcriptional regulator
MSMEG_4384	6.82938	1.99212e-22	7.89525	2.5003e-25	61	78	122	1510	774	954	25.481	27.001	26.308	826.569	623.654	702.152	Penicillin binding protein transpeptidase domain protein
MSMEG_1112	7.5899	2.05965e-22	9.48667	3.08597e-25	109	127	228	3582	2881	2888	45.532	43.963	49.166	1960.78	2321.38	2125.59	K01681 aconitate hydratase [EC:4.2.1.3]
MSMEG_3673	7.52266	2.05965e-22	9.51676	3.23134e-25	158	143	233	4028	3215	3203	66	49.502	50.244	2204.91	2590.5	2357.43	K00705 4-alpha-glucanotransferase [EC:2.4.1.25]
MSMEG_2837	9.0741	2.36388e-22	8.22159	4.07948e-25	33	28	65	2773	2155	2152	13.785	9.693	14.017	1517.93	1736.4	1583.89	nitrate reductase NarB
MSMEG_3141	8.20111	2.41929e-22	10.834	4.55467e-25	271	182	348	10346	7157	7479	113.202	63.003	75.043	5663.36	5766.79	5504.6	conserved domain protein
MSMEG_3536	8.26067	2.86088e-22	9.58173	6.2837e-25	119	131	184	5853	4212	4241	49.709	45.348	39.678	3203.91	3393.84	3121.41	sugar transport protein
MSMEG_5605	9.5468	2.86088e-22	9.63106	6.20057e-25	87	68	93	7975	5670	5888	36.342	23.539	20.055	4365.49	4568.63	4333.61	K00425 cytochrome bd ubiquinol oxidase subunit I [EC:7.1.1.7]
MSMEG_0280	10.7828	3.60494e-22	9.3613	9.36555e-25	31	33	38	8110	5451	5625	12.949	11.424	8.194	4439.39	4392.17	4140.05	alpha/beta hydrolase fold
MSMEG_1496	5.8844	3.60494e-22	8.46479	9.19202e-25	167	215	375	2168	1193	1407	69.759	74.426	80.865	1186.76	961.266	1035.56	K00020 3-hydroxyisobutyrate dehydrogenase [EC:1.1.1.31]
MSMEG_5570	7.55113	3.60494e-22	8.82299	9.61469e-25	129	121	189	3370	2642	2750	53.886	41.886	40.756	1844.73	2128.8	2024.02	K01971 bifunctional non-homologous end joining protein LigD [EC:6.5.1.1]
MSMEG_1787	8.35847	3.84776e-22	9.08654	1.18477e-24	80	68	112	3603	2690	2731	33.418	23.539	24.152	1972.27	2167.48	2010.04	RsbW protein
MSMEG_2035	6.42125	3.84776e-22	9.29573	1.2677e-24	194	220	340	2778	2101	2026	81.038	76.157	73.318	1520.67	1692.89	1491.15	K00274 monoamine oxidase [EC:1.4.3.4]
MSMEG_3615	6.13048	3.84776e-22	7.88371	1.08767e-24	129	196	290	1844	1291	1400	53.886	67.849	62.536	1009.4	1040.23	1030.41	K13953 alcohol dehydrogenase, propanol-preferring [EC:1.1.1.1]
MSMEG_5826	6.90174	3.84776e-22	9.3194	1.21768e-24	190	188	333	3599	2615	2795	79.367	65.08	71.808	1970.08	2107.05	2057.14	K00156 pyruvate dehydrogenase (quinone) [EC:1.2.5.1]
MSMEG_2115	7.95273	4.85291e-22	9.28538	1.74952e-24	132	131	150	4185	3292	3463	55.139	45.348	32.346	2290.86	2652.55	2548.8	conserved hypothetical protein
MSMEG_4991	6.40886	4.85291e-22	8.9944	1.75113e-24	182	234	376	2773	2245	2070	76.025	81.003	81.081	1517.93	1808.92	1523.54	hypothetical protein
MSMEG_3142	6.54896	5.97467e-22	9.47535	2.24964e-24	204	248	388	3588	2255	2588	85.215	85.85	83.669	1964.06	1816.98	1904.79	K21962 TetR/AcrR family transcriptional regulator, transcriptional repressor of aconitase
MSMEG_6322	7.41152	1.04599e-21	8.04231	4.10258e-24	49	53	99	1483	1082	1054	20.468	18.347	21.348	811.789	871.827	775.752	K00635 diacylglycerol O-acyltransferase / wax synthase [EC:2.3.1.20 2.3.1.75]
MSMEG_1782	7.95265	1.11786e-21	10.6841	4.55983e-24	286	231	429	9564	7316	7913	119.468	79.965	92.51	5235.3	5894.9	5824.03	oxidoreductase, short chain dehydrogenase/reductase family protein
MSMEG_5543	7.98583	1.12681e-21	11.6615	4.77311e-24	601	511	887	20452	15969	17542	251.05	176.892	191.273	11195.4	12867.1	12911.1	hypothetical protein
MSMEG_6500	6.33752	1.55006e-21	8.78013	6.80917e-24	141	153	294	1909	1478	1565	58.899	52.964	63.398	1044.98	1190.91	1151.85	conserved hypothetical protein
MSMEG_5401	8.73626	1.63308e-21	9.35887	7.43009e-24	110	60	133	5446	3809	3962	45.949	20.77	28.68	2981.12	3069.12	2916.06	conserved hypothetical protein
MSMEG_2913	8.76033	1.67002e-21	9.11689	7.86014e-24	73	56	109	4184	3230	3358	30.494	19.385	23.505	2290.31	2602.59	2471.51	hydrolase
MSMEG_1790	7.57471	1.67522e-21	10.4809	8.14742e-24	296	242	381	7350	5846	5607	123.645	83.773	82.159	4023.36	4710.44	4126.8	conserved hypothetical protein
MSMEG_3444	7.48222	2.08887e-21	7.37859	1.04869e-23	34	36	77	1139	839	787	14.202	12.462	16.604	623.485	676.028	579.238	choline dehydrogenase
MSMEG_2375	5.84569	2.11841e-21	9.39692	1.09676e-23	327	398	674	3245	2510	2681	136.595	137.775	145.342	1776.3	2022.44	1973.24	K03809 NAD(P)H dehydrogenase (quinone) [EC:1.6.5.2]
MSMEG_1695	6.49536	2.71632e-21	8.61231	1.44893e-23	129	172	293	2123	1740	1717	53.886	59.541	63.183	1162.12	1402.01	1263.73	K01840 phosphomannomutase [EC:5.4.2.8]
MSMEG_2959	7.08253	2.96417e-21	9.53148	1.67415e-23	208	228	403	4538	4023	3404	86.886	78.926	86.903	2484.09	3241.55	2505.37	K07250 4-aminobutyrate aminotransferase / (S)-3-amino-2-methylpropionate transaminase
MSMEG_5606	9.51861	2.96417e-21	8.12155	1.63617e-23	34	27	32	2800	2210	2067	14.202	9.347	6.901	1532.71	1780.72	1521.33	K00426 cytochrome bd ubiquinol oxidase subunit II [EC:7.1.1.7]
MSMEG_0375	8.70851	3.09505e-21	8.2225	1.89374e-23	47	32	61	2306	1856	1908	19.633	11.077	13.154	1262.3	1495.48	1404.3	phospholipase D family protein
MSMEG_2112	8.08474	3.09505e-21	9.85379	1.80232e-23	173	153	279	6016	5657	5573	72.266	52.964	60.164	3293.14	4558.16	4101.77	secreted protein
MSMEG_5342	7.49777	3.09505e-21	9.73956	1.85938e-23	184	136	241	4587	3149	3082	76.861	47.079	51.969	2510.91	2537.32	2268.38	conserved hypothetical protein
MSMEG_3289	8.33413	3.42968e-21	11.5394	2.15229e-23	434	281	501	16948	12111	12766	181.291	97.273	108.036	9277.28	9758.5	9395.88	gp61 protein
MSMEG_6616	8.58833	3.88234e-21	10.6302	2.49727e-23	222	153	259	10108	7699	8024	92.734	52.964	55.851	5533.09	6203.51	5905.73	S-(hydroxymethyl)glutathione dehydrogenase
MSMEG_1775	7.75563	4.41393e-21	8.63782	2.90846e-23	83	78	106	2391	1912	1825	34.671	27.001	22.858	1308.83	1540.6	1343.21	cytochrome P450 monooxygenase
MSMEG_6210	6.07476	5.01789e-21	8.47917	3.38515e-23	144	144	243	1538	1096	1175	60.152	49.848	52.401	841.896	883.108	864.809	conserved hypothetical protein
MSMEG_0358	5.53904	8.08133e-21	7.40922	6.33929e-23	78	123	170	823	470	559	32.582	42.579	36.659	450.507	378.705	411.428	K00526 ribonucleoside-diphosphate reductase beta chain [EC:1.17.4.1]
MSMEG_0684	7.20799	8.08133e-21	10.7682	6.18712e-23	439	356	687	9028	7045	7063	183.379	123.236	148.145	4941.9	5676.54	5198.42	K11177 xanthine dehydrogenase YagR molybdenum-binding subunit [EC:1.17.1.4]
MSMEG_1767	7.20721	8.08133e-21	8.64128	5.95356e-23	85	57	120	1570	1229	1205	35.506	19.732	25.877	859.413	990.273	886.89	conserved hypothetical protein
MSMEG_1794	7.81492	8.08133e-21	10.0638	6.14633e-23	218	155	289	6405	4691	4679	91.063	53.656	62.32	3506.07	3779.8	3443.78	dehydrogenase
MSMEG_5140	7.4588	8.08133e-21	7.22772	6.22811e-23	37	32	43	1008	525	604	15.456	11.077	9.273	551.776	423.021	444.549	K00370 nitrate reductase / nitrite oxidoreductase, alpha subunit [EC:1.7.5.1 1.7.99.-]
MSMEG_5271	6.34346	8.08133e-21	7.52124	6.2157e-23	75	120	173	1581	740	946	31.329	41.54	37.306	865.434	596.259	696.264	esterase
MSMEG_5473	5.32889	8.08133e-21	6.77483	5.88361e-23	63	69	105	419	287	311	26.316	23.886	22.642	229.359	231.252	228.898	K11735 GABA permease
MSMEG_0597	4.9857	8.19706e-21	7.24548	6.68728e-23	116	154	241	755	466	509	48.456	53.31	51.969	413.284	375.482	374.628	conserved hypothetical protein
MSMEG_6445	5.94917	8.19706e-21	6.83423	6.62963e-23	46	67	115	572	456	445	19.215	23.193	24.799	313.111	367.424	327.524	K04477 putative hydrolase
MSMEG_1789	7.58597	8.44748e-21	8.77073	7.05549e-23	93	67	115	2131	1724	1667	38.848	23.193	24.799	1166.5	1389.12	1226.92	conserved hypothetical protein
MSMEG_6678	8.28218	8.44748e-21	7.89923	7.15664e-23	33	32	59	1944	1030	1226	13.785	11.077	12.723	1064.14	829.928	902.346	conserved hypothetical protein
MSMEG_1803	4.83091	8.45071e-21	10.1618	7.29195e-23	718	790	1362	3344	2600	2669	299.923	273.473	293.703	1830.49	2094.96	1964.4	K04757 serine/threonine-protein kinase RsbW [EC:2.7.11.1]
MSMEG_1658	6.00019	8.64516e-21	9.48978	7.731e-23	318	403	669	3552	2877	2883	132.835	139.506	144.264	1944.35	2318.16	2121.91	K07058 membrane protein
MSMEG_5153	5.80455	8.64516e-21	10.28	7.60247e-23	590	779	1314	7441	4036	4581	246.455	269.665	283.352	4073.18	3252.03	3371.65	conserved hypothetical protein
MSMEG_5343	6.73409	9.30718e-21	10.373	8.46904e-23	399	299	506	5780	4082	3952	166.67	103.504	109.114	3163.95	3289.09	2908.7	conserved hypothetical protein
MSMEG_4710	6.10381	9.44701e-21	7.04158	8.74448e-23	69	115	190	1314	635	805	28.823	39.809	40.972	719.279	511.654	592.486	K09699 2-oxoisovalerate dehydrogenase E2 component (dihydrolipoyl transacylase) [EC:2.3.1.168]
MSMEG_6398	-4.77926	1.28722e-20	8.8758	1.21169e-22	16808	26337	41965	148	82	93	7021.05	9117.03	9049.36	81.015	66.072	68.449	K18851 diacylglycerol O-acyltransferase / trehalose O-mycolyltransferase [EC:2.3.1.20 2.3.1.122]
MSMEG_1772	5.11925	1.42768e-20	8.91663	1.36631e-22	232	213	390	1250	902	926	96.911	73.734	84.1	684.246	726.791	681.543	conserved hypothetical protein
MSMEG_0963	9.83906	1.44492e-20	8.18543	1.40547e-22	20	20	32	2911	2114	2075	8.354	6.923	6.901	1593.47	1703.37	1527.22	hypothetical protein
MSMEG_1766	7.45862	1.54068e-20	8.37268	1.52279e-22	70	55	80	1431	1184	1155	29.24	19.039	17.251	783.325	954.014	850.089	conserved hypothetical protein
MSMEG_2752	5.68925	1.73675e-20	11.0829	1.74384e-22	1041	961	1473	7792	5507	6068	434.847	332.668	317.639	4265.31	4437.29	4466.1	K03087 RNA polymerase nonessential primary-like sigma factor
MSMEG_2058	7.75567	1.75479e-20	8.6806	1.78948e-22	41	41	74	1376	1152	1037	17.127	14.193	15.957	753.218	928.23	763.24	K00335 NADH-quinone oxidoreductase subunit F [EC:7.1.1.2]
MSMEG_6213	7.65668	1.77132e-20	10.8253	1.83412e-22	399	317	482	8541	8332	9010	166.67	109.735	103.939	4675.31	6713.55	6631.43	K07217 manganese catalase [EC:1.11.1.6]
MSMEG_0968	7.92884	1.95817e-20	8.70003	2.05832e-22	84	90	126	3202	2300	2329	35.089	31.155	27.171	1752.76	1853.24	1714.16	cytochrome P450
MSMEG_1761	8.9727	1.9752e-20	7.03353	2.10721e-22	11	15	25	1225	755	825	4.595	5.193	5.391	670.561	608.345	607.207	integral membrane protein
MSMEG_5402	8.19676	2.09419e-20	9.33932	2.26701e-22	117	85	162	4458	3258	3477	48.873	29.424	34.934	2440.29	2625.15	2559.1	dehydrogenase DhgA
MSMEG_1771	6.37237	2.09898e-20	10.2068	2.30513e-22	323	267	400	3473	2754	2617	134.924	92.427	86.256	1901.11	2219.05	1926.13	K02493 release factor glutamine methyltransferase [EC:2.1.1.297]
MSMEG_5390	6.85023	2.14482e-20	7.11457	2.38912e-22	44	45	92	844	674	667	18.38	15.578	19.839	462.003	543.079	490.917	conserved hypothetical protein
MSMEG_2337	5.94231	2.21129e-20	8.35066	2.49785e-22	104	93	179	977	703	752	43.443	32.194	38.6	534.806	566.446	553.478	K01823 isopentenyl-diphosphate Delta-isomerase [EC:5.3.3.2]
MSMEG_0685	7.60652	2.30784e-20	8.16513	2.64312e-22	68	57	75	1545	1255	1280	28.405	19.732	16.173	845.728	1011.22	942.09	K11178 xanthine dehydrogenase YagS FAD-binding subunit [EC:1.17.1.4]
MSMEG_4916	5.47537	2.51861e-20	9.86696	2.92402e-22	458	493	868	3362	2646	2530	191.316	170.661	187.176	1840.35	2132.03	1862.1	K16147 starch synthase (maltosyl-transferring) [EC:2.4.99.16]
MSMEG_5400	6.65321	2.70729e-20	9.53689	3.20677e-22	268	202	312	3552	2344	2599	111.949	69.926	67.28	1944.35	1888.69	1912.88	dehydrogenase
MSMEG_6615	7.24539	2.70729e-20	8.06332	3.22802e-22	63	44	79	1182	851	909	26.316	15.231	17.036	647.023	685.698	669.031	hypothetical protein
MSMEG_2347	6.24782	2.70947e-20	10.0634	3.31564e-22	303	235	400	3263	2235	2184	126.569	81.35	86.256	1786.15	1800.86	1607.44	K10027 phytoene desaturase [EC:1.3.99.26 1.3.99.28 1.3.99.29 1.3.99.31]
MSMEG_6212	6.80889	2.70947e-20	8.7606	3.30762e-22	124	98	176	1806	1383	1508	51.797	33.924	37.953	988.598	1114.36	1109.9	hemerythrin HHE cation binding domain subfamily protein, putative
MSMEG_2121	5.39771	2.71539e-20	6.78544	3.36548e-22	70	83	138	554	382	371	29.24	28.732	29.758	303.258	307.798	273.059	K23993 multiphosphoryl transfer protein [EC:2.7.3.9 2.7.1.202]
MSMEG_1097	6.92805	2.81037e-20	10.0431	3.53002e-22	267	201	367	4372	3283	3158	111.531	69.58	79.14	2393.22	2645.29	2324.31	glycosyl transferase, group 2 family protein
MSMEG_1768	6.65096	2.81037e-20	8.86273	3.57138e-22	126	87	160	1518	1172	1227	52.633	30.117	34.503	830.948	944.345	903.082	conserved hypothetical protein
MSMEG_1774	5.8095	3.08451e-20	8.54132	3.96814e-22	173	158	254	1296	1127	1067	72.266	54.695	54.773	709.426	908.086	785.32	conserved hypothetical protein
MSMEG_3443	8.06965	3.18851e-20	8.23021	4.15196e-22	53	36	100	2065	1686	1426	22.139	12.462	21.564	1130.37	1358.5	1049.55	hypothetical protein
MSMEG_3273	8.12998	3.83382e-20	7.94526	5.06483e-22	42	45	57	1707	1332	1250	17.544	15.578	12.292	934.406	1073.27	920.01	glutamyl aminopeptidase, M42 family protein
MSMEG_3593	6.2184	3.83382e-20	7.49701	5.11256e-22	68	52	104	727	475	550	28.405	18.001	22.427	397.957	382.734	404.804	conserved hypothetical protein
MSMEG_3952	5.10569	4.32047e-20	8.57111	5.82931e-22	195	179	316	1038	736	756	81.456	61.964	68.142	568.198	593.036	556.422	conserved hypothetical protein
MSMEG_0266	7.07542	4.66274e-20	9.76992	6.43742e-22	206	225	355	4708	3160	3505	86.05	77.888	76.552	2577.14	2546.19	2579.71	K01585 arginine decarboxylase [EC:4.1.1.19]
MSMEG_5661	5.27892	4.66274e-20	7.68942	6.42214e-22	125	179	290	1028	690	709	52.215	61.964	62.536	562.724	555.971	521.83	ABC transporter ATP-binding protein
MSMEG_5571	6.72654	4.7533e-20	6.57804	6.63702e-22	39	40	63	866	346	486	16.291	13.847	13.585	474.045	278.791	357.7	K10112 multiple sugar transport system ATP-binding protein [EC:7.5.2.-]
MSMEG_5582	5.72023	4.82814e-20	6.7403	6.81727e-22	51	75	98	523	346	393	21.304	25.963	21.133	286.288	278.791	289.251	hypothetical protein
MSMEG_1783	7.58268	5.16542e-20	7.90281	7.37454e-22	69	40	83	1498	1092	1176	28.823	13.847	17.898	820	879.884	865.545	hypothetical protein
MSMEG_4564	4.93153	6.32636e-20	6.34665	9.13123e-22	50	82	120	373	207	244	20.886	28.386	25.877	204.179	166.791	179.586	CBS domain protein
MSMEG_3008	5.55453	6.38088e-20	7.45563	9.31004e-22	82	115	156	939	413	505	34.253	39.809	33.64	514.005	332.777	371.684	K21405 sigma-54 dependent transcriptional regulator
MSMEG_1547	4.80074	6.41534e-20	7.83427	9.46096e-22	103	144	179	603	331	366	43.025	49.848	38.6	330.08	266.705	269.379	K01699 propanediol dehydratase large subunit [EC:4.2.1.28]
MSMEG_5189	5.84041	6.5175e-20	10.8015	9.71387e-22	798	675	1150	6293	4959	4814	333.341	233.664	247.987	3444.77	3995.74	3543.14	oxidoreductase
MSMEG_0420	7.57581	7.31524e-20	5.64543	1.10176e-21	11	12	21	366	261	286	4.595	4.154	4.528	200.347	210.302	210.498	conserved hypothetical protein
MSMEG_0697	8.60478	7.91825e-20	9.09146	1.21743e-21	91	65	90	3667	3025	3233	38.013	22.501	19.408	2007.3	2437.41	2379.51	integral membrane protein
MSMEG_1770	4.1439	7.91825e-20	13.672	1.21125e-21	12788	18063	24527	43083	29979	31526	5341.81	6252.84	5289.02	23583.5	24155.7	23203.4	conserved hypothetical protein
MSMEG_0430	6.18725	8.13554e-20	8.69384	1.26545e-21	179	254	381	2361	1865	2002	74.772	87.927	82.159	1292.4	1502.73	1473.49	K07485 transposase
MSMEG_0901	4.79286	8.13554e-20	8.38887	1.27636e-21	180	292	474	1155	769	791	75.19	101.081	102.214	632.243	619.626	582.182	K09959 uncharacterized protein
MSMEG_5875	5.59167	1.0439e-19	6.19417	1.65413e-21	39	43	94	389	250	254	16.291	14.885	20.27	212.937	201.439	186.946	hypothetical protein
MSMEG_0536	5.06179	1.06167e-19	6.38996	1.69894e-21	58	65	102	310	235	252	24.228	22.501	21.995	169.693	189.352	185.474	K05520 deglycase [EC:3.5.1.124]
MSMEG_2037	7.3958	1.09322e-19	8.37818	1.77254e-21	67	61	119	1774	1272	1331	27.987	21.116	25.661	971.082	1024.92	979.627	conserved hypothetical protein
MSMEG_4576	6.04118	1.09322e-19	6.37556	1.78374e-21	41	42	72	514	282	313	17.127	14.539	15.526	281.362	227.223	230.37	SpfH domain protein
MSMEG_0696	8.30763	1.11417e-19	7.8545	1.8354e-21	38	34	54	1539	1336	1333	15.873	11.77	11.645	842.443	1076.49	981.099	alanine-rich protein
MSMEG_0318	4.76936	1.12318e-19	6.34509	1.88502e-21	71	97	162	399	279	272	29.658	33.578	34.934	218.411	224.806	200.194	K15868 bile acid-coenzyme A ligase [EC:6.2.1.7]
MSMEG_0357	5.24037	1.12318e-19	6.8946	1.92072e-21	65	95	144	500	365	351	27.152	32.886	31.052	273.698	294.101	258.339	transmembrane transport protein
MSMEG_0523	7.79521	1.12318e-19	6.68135	1.92054e-21	27	16	37	723	540	571	11.278	5.539	7.979	395.768	435.108	420.261	DNA-binding protein
MSMEG_2914	5.52241	1.12318e-19	6.94317	1.89815e-21	68	63	113	505	315	374	28.405	21.809	24.367	276.435	253.813	275.267	K00098 L-idonate 5-dehydrogenase [EC:1.1.1.264]
MSMEG_3311	8.36853	1.21507e-19	7.11063	2.09692e-21	17	17	45	952	861	877	7.101	5.885	9.704	521.122	693.755	645.479	acyl carrier protein
MSMEG_6159	-4.75167	1.44001e-19	9.96039	2.5077e-21	39448	61244	80539	310	201	206	16478.2	21200.7	17367.5	169.693	161.957	151.618	K03704 cold shock protein
MSMEG_1777	6.44007	1.5595e-19	10.4694	2.74025e-21	392	301	526	4225	3357	3685	163.746	104.197	113.427	2312.75	2704.92	2712.19	UsfY protein
MSMEG_0988	3.50935	1.5721e-19	9.19926	2.78705e-21	649	931	1375	1440	990	1122	271.101	322.283	296.506	788.251	797.697	825.801	K02548 1,4-dihydroxy-2-naphthoate polyprenyltransferase [EC:2.5.1.74]
MSMEG_1605	4.47255	1.62762e-19	9.60559	2.91103e-21	400	394	621	1344	1037	994	167.088	136.39	133.913	735.701	835.568	731.592	K02039 phosphate transport system protein
MSMEG_1802	6.60843	1.96426e-19	10.5632	3.54393e-21	476	358	567	6290	4144	4404	198.835	123.928	122.268	3443.12	3339.05	3241.38	ChaB protein
MSMEG_1757	4.74137	1.99254e-19	9.43959	3.62621e-21	372	437	777	1777	1289	1380	155.392	151.276	167.553	972.724	1038.62	1015.69	K03724 ATP-dependent helicase Lhr and Lhr-like helicase [EC:5.6.2.6 5.6.2.4]
MSMEG_1711	14.5494	2.10861e-19	7.92758	3.87052e-21	4	7	16	31254	17913	20357	1.671	2.423	3.45	17108.3	14433.5	14982.9	K10820 galactofuranose transport system ATP-binding protein [EC:7.5.2.9]
MSMEG_3611	6.84699	2.48583e-19	7.6251	4.60779e-21	46	48	74	835	580	647	19.215	16.616	15.957	457.076	467.338	476.197	K01621 xylulose-5-phosphate/fructose-6-phosphate phosphoketolase [EC:4.1.2.9 4.1.2.22]
MSMEG_6935	3.74845	2.48583e-19	10.0832	4.64095e-21	1217	1565	2556	2923	2198	2402	508.366	541.753	551.178	1600.04	1771.05	1767.89	K01448 N-acetylmuramoyl-L-alanine amidase [EC:3.5.1.28]
MSMEG_4355	5.72459	2.75609e-19	8.67831	5.18875e-21	220	264	413	1956	1560	1515	91.899	91.388	89.06	1070.71	1256.98	1115.05	K02033 peptide/nickel transport system permease protein
MSMEG_1360	5.50637	2.93069e-19	7.87939	5.56343e-21	105	149	289	987	758	772	43.861	51.579	62.32	540.28	610.762	568.198	endonuclease/exonuclease/phosphatase
MSMEG_5486	4.29707	2.96486e-19	9.21695	5.67482e-21	471	741	1057	2095	1278	1364	196.746	256.511	227.932	1146.8	1029.76	1003.91	K08372 putative serine protease PepD [EC:3.4.21.-]
MSMEG_1951	6.03573	3.16866e-19	10.3231	6.1146e-21	603	500	793	4964	3939	4443	251.885	173.084	171.003	2717.28	3173.87	3270.08	conserved domain protein
MSMEG_5078	4.59545	3.28541e-19	10.1555	6.39145e-21	681	639	1128	2460	1928	1897	284.468	221.201	243.243	1346.6	1553.5	1396.21	K00975 glucose-1-phosphate adenylyltransferase [EC:2.7.7.27]
MSMEG_1781	6.06226	3.45054e-19	7.83887	6.76682e-21	99	74	150	928	671	661	41.354	25.616	32.346	507.984	540.662	486.501	hypothetical protein
MSMEG_3312	7.44772	3.47211e-19	6.83108	6.8636e-21	26	27	55	697	640	642	10.861	9.347	11.86	381.535	515.683	472.517	hemerythrin HHE cation binding domain subfamily protein, putative
MSMEG_1791	4.69816	3.623e-19	7.53849	7.21871e-21	115	119	182	525	298	350	48.038	41.194	39.247	287.383	240.115	257.603	UsfY protein
MSMEG_2343	4.91816	3.7244e-19	8.89839	7.47919e-21	235	208	336	1015	732	779	98.164	72.003	72.455	555.608	589.813	573.35	methylesterase
MSMEG_3621	4.02187	3.85043e-19	9.96569	7.79267e-21	1048	1540	2309	3418	2439	2502	437.771	533.099	497.914	1871	1965.24	1841.49	K03885 NADH:quinone reductase (non-electrogenic) [EC:1.6.5.9]
MSMEG_3310	4.8234	3.94347e-19	7.74622	8.04286e-21	142	199	321	770	591	598	59.316	68.887	69.221	421.495	476.201	440.133	integral membrane protein
MSMEG_4712	6.5197	4.16805e-19	5.29909	8.56628e-21	21	18	36	322	192	225	8.772	6.231	7.763	176.262	154.705	165.602	K00166 2-oxoisovalerate dehydrogenase E1 component subunit alpha [EC:1.2.4.4]
MSMEG_4918	5.02791	4.39336e-19	9.88334	9.09826e-21	556	645	1077	2829	2523	2457	232.253	223.278	232.245	1548.59	2032.92	1808.37	K00700 1,4-alpha-glucan branching enzyme [EC:2.4.1.18]
MSMEG_5084	5.40633	4.44768e-19	7.6527	9.28053e-21	123	139	256	989	650	681	51.38	48.117	55.204	541.375	523.741	501.221	K13693 glucosyl-3-phosphoglycerate synthase [EC:2.4.1.266]
MSMEG_3157	5.38985	4.49584e-19	7.48387	9.45157e-21	120	148	236	682	811	737	50.126	51.233	50.891	373.324	653.467	542.438	conserved hypothetical protein
MSMEG_0987	4.5084	5.00088e-19	8.28078	1.05918e-20	241	407	588	1134	871	907	100.671	140.89	126.797	620.748	701.813	667.559	hypothetical protein
MSMEG_0964	6.40691	5.40141e-19	7.43792	1.15248e-20	72	115	129	1156	849	851	30.076	39.809	27.818	632.79	684.086	626.343	pyridoxamine 5'-phosphate oxidase family protein
MSMEG_3075	4.58878	5.54367e-19	6.844	1.19153e-20	86	159	249	497	356	367	35.924	55.041	53.695	272.056	286.849	270.115	acetyltransferase, GNAT family protein
MSMEG_5770	4.59326	5.63268e-19	9.84766	1.2195e-20	705	1005	1668	3712	2303	2542	294.493	347.899	359.689	2031.94	1855.65	1870.93	hypothetical protein
MSMEG_6321	4.26559	5.98522e-19	6.79012	1.30522e-20	94	120	191	310	255	255	39.266	41.54	41.187	169.693	205.468	187.682	glycerol dehydratase large subunit
MSMEG_2701	5.20501	6.60203e-19	6.95591	1.45008e-20	96	97	175	634	387	429	40.101	33.578	37.737	347.049	311.827	315.747	hypothetical protein
MSMEG_5722	6.5283	7.31783e-19	8.79825	1.62497e-20	163	103	189	1660	1481	1243	68.088	35.655	40.756	908.678	1193.32	914.858	conserved hypothetical protein
MSMEG_5907	5.69022	7.31783e-19	4.89063	1.63027e-20	15	18	34	149	113	108	6.266	6.231	7.332	81.562	91.05	79.489	K22819 3-oxocholest-4-en-26-oyl-CoA dehydrogenase beta subunit [EC:1.3.99.-]
MSMEG_6291	6.00524	7.68283e-19	6.46066	1.72363e-20	50	82	77	648	368	427	20.886	28.386	16.604	354.713	296.518	314.275	K00285 D-amino-acid dehydrogenase [EC:1.4.5.1]
MSMEG_3706	5.41132	7.96663e-19	6.07991	1.7998e-20	31	47	74	352	156	205	12.949	16.27	15.957	192.684	125.698	150.882	K01637 isocitrate lyase [EC:4.1.3.1]
MSMEG_3689	3.54492	8.16781e-19	11.0373	1.85807e-20	2292	3211	5406	4903	4023	4198	957.415	1111.55	1165.75	2683.89	3241.55	3089.76	K03307 solute:Na+ symporter, SSS family
MSMEG_5876	5.87829	8.4167e-19	6.11302	1.92789e-20	27	44	55	302	248	236	11.278	15.231	11.86	165.314	199.827	173.698	H-N-H endonuclease F-TflIV
MSMEG_2346	6.32401	8.67835e-19	7.93245	2.00144e-20	70	42	83	630	496	476	29.24	14.539	17.898	344.86	399.654	350.34	K02291 15-cis-phytoene synthase [EC:2.5.1.32]
MSMEG_1950	6.50974	8.90146e-19	9.98058	2.06686e-20	371	345	539	4813	3499	3996	154.974	119.428	116.23	2634.62	2819.34	2941.09	conserved hypothetical protein
MSMEG_2376	9.0919	8.96698e-19	9.82796	2.09614e-20	129	80	148	7195	6208	6689	53.886	27.693	31.915	3938.52	5002.13	4923.16	conserved hypothetical protein
MSMEG_1788	7.80447	9.8983e-19	10.3318	2.32938e-20	275	165	301	6274	5539	5486	114.873	57.118	64.908	3434.37	4463.08	4037.74	conserved hypothetical protein
MSMEG_1760	3.6511	1.04402e-18	7.99628	2.47329e-20	281	409	613	772	478	493	117.379	141.583	132.188	422.59	385.151	362.852	short-chain dehydrogenase/reductase SDR
MSMEG_6787	6.95125	1.06321e-18	8.15572	2.53543e-20	74	64	135	1430	1037	1063	30.911	22.155	29.111	782.777	835.568	782.376	K01808 ribose 5-phosphate isomerase B [EC:5.3.1.6]
MSMEG_6665	7.59264	1.15286e-18	9.60361	2.76729e-20	233	134	233	4422	3820	3795	97.329	46.387	50.244	2420.59	3077.98	2793.15	integral membrane protein
MSMEG_1358	7.18989	1.16942e-18	7.60576	2.82539e-20	42	43	101	1084	815	906	17.544	14.885	21.78	593.378	656.69	666.823	conserved hypothetical protein
MSMEG_6767	6.8841	1.26285e-18	9.95116	3.07095e-20	448	266	492	5979	4481	4594	187.139	92.081	106.095	3272.88	3610.59	3381.22	mycocerosic acid synthase
MSMEG_4554	4.97823	1.27282e-18	6.43227	3.11515e-20	73	65	106	359	220	244	30.494	22.501	22.858	196.515	177.266	179.586	probable serine/threonine-protein kinase PknH, putative
MSMEG_6727	5.71892	1.2792e-18	9.58042	3.15084e-20	314	295	563	2743	1835	1965	131.164	102.12	121.406	1501.51	1478.56	1446.26	amino acid permease-associated region
MSMEG_6819	7.47211	1.40333e-18	7.91918	3.47861e-20	61	37	88	1373	988	1024	25.481	12.808	18.976	751.576	796.086	753.672	pseudogene
MSMEG_0265	8.77001	1.6233e-18	7.68393	4.04934e-20	29	19	34	1527	1087	1127	12.114	6.577	7.332	835.875	875.856	829.481	K21929 uracil-DNA glycosylase [EC:3.2.2.27]
MSMEG_0267	7.03437	1.67019e-18	10.0971	4.19251e-20	326	201	375	4657	3791	3968	136.177	69.58	80.865	2549.23	3054.62	2920.48	esterase
MSMEG_3185	4.09616	1.72605e-18	10.8779	4.35981e-20	1343	1524	2477	3915	2866	2936	560.999	527.56	534.142	2143.06	2309.29	2160.92	pseudogene
MSMEG_1793	6.0011	1.83212e-18	6.45486	4.65646e-20	38	33	53	323	238	278	15.873	11.424	11.429	176.809	191.77	204.61	membrane protein
MSMEG_0419	7.16574	1.84075e-18	5.02561	4.70728e-20	8	8	16	238	129	146	3.342	2.769	3.45	130.28	103.942	107.457	integral membrane protein
MSMEG_0746	6.21607	1.89631e-18	5.69509	4.87911e-20	19	17	36	234	165	170	7.937	5.885	7.763	128.091	132.95	125.121	K03520 aerobic carbon-monoxide dehydrogenase large subunit [EC:1.2.5.3]
MSMEG_0637	6.76595	2.19921e-18	9.51533	5.69297e-20	200	136	255	2495	2072	2170	83.544	47.079	54.988	1365.76	1669.52	1597.14	iron-sulfur binding oxidoreductase
MSMEG_1497	6.06852	2.36322e-18	5.85896	6.15939e-20	23	29	72	413	225	238	9.608	10.039	15.526	226.075	181.295	175.17	acyl-CoA dehydrogenase family protein member 8
MSMEG_3162	3.93053	2.36322e-18	6.78654	6.19167e-20	102	137	210	322	201	209	42.607	47.425	45.285	176.262	161.957	153.826	beta-lactamase
MSMEG_1764	4.57626	2.46353e-18	6.25794	6.49314e-20	152	235	310	756	467	555	63.494	81.35	66.849	413.832	376.288	408.484	K03918 L-lysine 6-transaminase [EC:2.6.1.36]
MSMEG_5404	4.56294	2.46365e-18	6.57769	6.53212e-20	79	95	136	395	197	217	33	32.886	29.327	216.222	158.734	159.714	K01908 propionyl-CoA synthetase [EC:6.2.1.17]
MSMEG_4563	4.00333	2.51246e-18	6.85083	6.70096e-20	147	202	277	427	319	323	61.405	69.926	59.732	233.738	257.036	237.731	puromycin N-acetyltransferase
MSMEG_3418	5.04605	2.5614e-18	9.26907	6.87165e-20	478	487	666	2316	1698	1831	199.67	168.584	143.617	1267.77	1368.17	1347.63	conserved hypothetical protein
MSMEG_3419	5.97738	2.59899e-18	9.52572	7.01328e-20	370	271	501	2929	2243	2459	154.557	93.812	108.036	1603.33	1807.31	1809.84	hypothetical protein
MSMEG_1780	7.4523	2.74511e-18	7.09134	7.45064e-20	30	19	56	762	550	564	12.532	6.577	12.076	417.116	443.165	415.108	hypothetical protein
MSMEG_6812	7.8277	2.85776e-18	6.7741	7.80122e-20	25	16	23	586	455	457	10.443	5.539	4.96	320.774	366.619	336.356	pseudogene
MSMEG_3522	5.49109	2.89384e-18	5.58122	7.94512e-20	26	34	53	274	128	159	10.861	11.77	11.429	149.987	103.137	117.025	dopamine receptor D4
MSMEG_1057	5.96569	3.27417e-18	8.32983	9.04069e-20	123	80	164	944	682	755	51.38	27.693	35.365	516.742	549.525	555.686	K01823 isopentenyl-diphosphate Delta-isomerase [EC:5.3.3.2]
MSMEG_0416	5.5476	3.31521e-18	8.48333	9.20601e-20	194	292	418	1768	1257	1431	81.038	101.081	90.138	967.797	1012.83	1053.23	hypothetical protein
MSMEG_1847	8.55505	3.50111e-18	5.82319	9.86788e-20	9	9	17	516	431	485	3.759	3.116	3.666	282.457	347.28	356.964	K00124 formate dehydrogenase iron-sulfur subunit
MSMEG_2336	4.79032	3.50111e-18	7.19154	9.81487e-20	117	110	178	463	375	352	48.873	38.079	38.384	253.445	302.158	259.075	pseudogene
MSMEG_5139	8.58892	3.50111e-18	5.44923	9.88703e-20	4	9	7	400	225	243	1.671	3.116	1.509	218.959	181.295	178.85	K00371 nitrate reductase / nitrite oxidoreductase, beta subunit [EC:1.7.5.1 1.7.99.-]
MSMEG_6751	6.7061	3.59452e-18	5.76228	1.02072e-19	12	16	38	287	219	212	5.013	5.539	8.194	157.103	176.46	156.034	hypothetical protein
MSMEG_2113	6.28803	3.65527e-18	6.5898	1.04933e-19	38	38	79	478	421	369	15.873	13.154	17.036	261.656	339.223	271.587	hypothetical protein
MSMEG_6233	9.03089	3.65527e-18	6.219	1.04944e-19	10	7	13	732	492	498	4.177	2.423	2.803	400.694	396.431	366.532	conserved hypothetical protein
MSMEG_1298	5.40419	3.99369e-18	5.85349	1.15287e-19	36	40	66	246	195	197	15.038	13.847	14.232	134.66	157.122	144.994	K01487 guanine deaminase [EC:3.5.4.3]
MSMEG_2344	5.15216	4.20342e-18	8.11029	1.22001e-19	147	91	156	641	434	401	61.405	31.501	33.64	350.881	349.698	295.139	K09879 carotenoid phi-ring synthase / carotenoid chi-ring synthase [EC:1.3.99.39 1.3.99.40]
MSMEG_1056	4.77799	4.33716e-18	7.19272	1.26563e-19	104	114	186	496	382	309	43.443	39.463	40.109	271.509	307.798	227.426	pseudogene
MSMEG_2057	9.55617	4.59137e-18	7.37754	1.34701e-19	7	10	18	1248	770	881	2.924	3.462	3.882	683.151	620.431	648.423	K00336 NADH-quinone oxidoreductase subunit G [EC:7.1.1.2]
MSMEG_4298	-4.73356	4.5914e-18	7.25713	1.35423e-19	13662	19706	35557	108	72	84	5706.9	6821.59	7667.54	59.119	58.014	61.825	K00606 3-methyl-2-oxobutanoate hydroxymethyltransferase [EC:2.1.2.11]
MSMEG_3305	4.12111	5.24396e-18	5.77875	1.55492e-19	42	56	96	141	99	116	17.544	19.385	20.702	77.183	79.77	85.377	integral membrane protein DUF6
MSMEG_5474	5.77455	5.91877e-18	5.8027	1.7643e-19	29	22	43	229	159	156	12.114	7.616	9.273	125.354	128.115	114.817	universal stress protein family protein
MSMEG_0984	5.16624	6.07386e-18	5.9257	1.83514e-19	29	32	58	239	110	123	12.114	11.077	12.507	130.828	88.633	90.529	trap transporter, 4tm/12tm fusion protein
MSMEG_5938	7.24989	6.07386e-18	8.11316	1.84865e-19	76	55	101	1308	1124	1236	31.747	19.039	21.78	715.995	905.669	909.706	hypothetical protein
MSMEG_6211	6.58853	6.07386e-18	6.48679	1.84777e-19	26	21	41	304	314	273	10.861	7.27	8.841	166.409	253.007	200.93	hypothetical protein
MSMEG_6788	4.21993	6.07386e-18	6.66122	1.83044e-19	95	140	198	340	270	244	39.683	48.464	42.697	186.115	217.554	179.586	K20901 L-erythrulose 1-kinase [EC:2.7.1.209]
MSMEG_1773	5.85052	6.08778e-18	9.3235	1.86244e-19	246	165	272	1619	1220	1338	102.759	57.118	58.654	886.235	983.021	984.779	conserved hypothetical protein
MSMEG_3594	3.58938	6.13321e-18	8.02196	1.88596e-19	307	461	665	901	416	567	128.24	159.584	143.401	493.204	335.194	417.317	K00529 3-phenylpropionate/trans-cinnamate dioxygenase ferredoxin reductase component [EC:1.18.1.3]
MSMEG_5951	5.70873	7.20759e-18	4.76319	2.22764e-19	13	19	39	153	114	123	5.43	6.577	8.41	83.752	91.856	90.529	glycosyl transferase, group 1, putative
MSMEG_6766	7.13285	7.89495e-18	7.43482	2.45246e-19	95	64	80	1425	1096	944	39.683	22.155	17.251	780.04	883.108	694.791	K01990 ABC-2 type transport system ATP-binding protein
MSMEG_6020	6.59812	7.94775e-18	5.35829	2.48133e-19	11	22	36	335	168	218	4.595	7.616	7.763	183.378	135.367	160.45	K10543 D-xylose transport system substrate-binding protein
MSMEG_4339	4.20214	7.99037e-18	7.27635	2.50717e-19	118	194	301	535	305	350	49.291	67.157	64.908	292.857	245.755	257.603	tetratricopeptide repeat family protein
MSMEG_1846	7.97078	8.56532e-18	5.77562	2.70102e-19	15	11	25	567	387	409	6.266	3.808	5.391	310.374	311.827	301.027	polysulphide reductase, NrfD
MSMEG_5496	5.94008	8.57529e-18	7.06694	2.72668e-19	48	35	64	374	262	308	20.051	12.116	13.801	204.726	211.108	226.69	MscS Mechanosensitive ion channel
MSMEG_6019	5.81696	8.57529e-18	5.27717	2.73107e-19	14	28	46	229	118	182	5.848	9.693	9.919	125.354	95.079	133.953	K10545 D-xylose transport system ATP-binding protein [EC:7.5.2.10]
MSMEG_0900	4.80123	8.89086e-18	6.67609	2.84552e-19	63	92	158	437	217	283	26.316	31.847	34.071	239.212	174.849	208.29	K00138 aldehyde dehydrogenase [EC:1.2.1.-]
MSMEG_0522	9.20379	9.1119e-18	6.46281	2.93288e-19	9	9	16	828	680	684	3.759	3.116	3.45	453.244	547.913	503.429	pp24 protein
MSMEG_0686	6.78457	9.1119e-18	7.47643	2.94486e-19	52	37	77	758	539	608	21.721	12.808	16.604	414.927	434.302	447.493	K13483 xanthine dehydrogenase YagT iron-sulfur-binding subunit
MSMEG_1736	3.5688	9.2985e-18	9.19357	3.01975e-19	687	945	1407	1512	1156	1139	286.974	327.129	303.406	827.664	931.453	838.313	K00111 glycerol-3-phosphate dehydrogenase [EC:1.1.5.3]
MSMEG_6467	4.65496	9.3124e-18	10.9447	3.03888e-19	1542	1167	1933	5166	3528	3910	644.125	403.978	416.834	2827.85	2842.7	2877.79	K04047 starvation-inducible DNA-binding protein
MSMEG_6515	3.5683	9.8204e-18	9.24337	3.22006e-19	576	700	1162	1169	951	919	240.607	242.318	250.575	639.907	766.273	676.391	K05343 maltose alpha-D-glucosyltransferase / alpha-amylase [EC:5.4.99.16 3.2.1.1]
MSMEG_6768	7.08291	1.14243e-17	8.59046	3.76388e-19	100	83	157	1860	1457	1517	41.772	28.732	33.856	1018.16	1173.98	1116.52	halogenase
MSMEG_2122	5.84149	1.17393e-17	4.8852	3.8861e-19	20	12	32	149	118	112	8.354	4.154	6.901	81.562	95.079	82.433	K05879 phosphoenolpyruvate---glycerone phosphotransferase subunit DhaL [EC:2.7.1.121]
MSMEG_4590	5.454	1.19139e-17	5.46427	3.96258e-19	24	34	50	176	171	157	10.025	11.77	10.782	96.342	137.784	115.553	ssuD; nitrilotriacetate monooxygenase component A
MSMEG_1659	4.13334	1.24919e-17	6.98147	4.17441e-19	129	198	273	407	332	367	53.886	68.541	58.87	222.79	267.511	270.115	K11741 quaternary ammonium compound-resistance protein SugE
MSMEG_6535	7.02441	1.30708e-17	5.77243	4.38836e-19	17	17	22	405	192	218	7.101	5.885	4.744	221.696	154.705	160.45	K02355 elongation factor G
MSMEG_4357	5.19622	1.30905e-17	8.73499	4.41554e-19	290	386	674	2065	1543	1533	121.139	133.621	145.342	1130.37	1243.28	1128.3	K02031 peptide/nickel transport system ATP-binding protein K02032
MSMEG_2123	5.29642	1.32488e-17	5.63349	4.48971e-19	36	35	55	218	159	151	15.038	12.116	11.86	119.332	128.115	111.137	K05878 phosphoenolpyruvate---glycerone phosphotransferase subunit DhaK [EC:2.7.1.121]
MSMEG_1792	8.37564	1.33444e-17	8.8453	4.54303e-19	73	58	92	2919	2400	2442	30.494	20.078	19.839	1597.85	1933.81	1797.33	conserved hypothetical protein
MSMEG_2345	5.00825	1.54082e-17	6.82743	5.26983e-19	50	40	74	250	142	170	20.886	13.847	15.957	136.849	114.417	125.121	pseudogene
MSMEG_5573	4.59971	1.55403e-17	5.32067	5.3394e-19	37	48	79	215	91	132	15.456	16.616	17.036	117.69	73.324	97.153	K10228 polyol transport system permease protein
MSMEG_1885	3.97417	1.55685e-17	9.01514	5.37348e-19	411	493	780	1126	860	825	171.683	170.661	168.2	616.369	692.949	607.207	K22770 stearoyl-CoA 9-desaturase NADPH oxidoreductase
MSMEG_2389	3.75238	1.64168e-17	11.7491	5.69204e-19	4070	6708	12253	15003	7543	9445	1700.12	2322.1	2642.25	8212.59	6077.81	6951.6	K03530 DNA-binding protein HU-beta
MSMEG_2838	8.59413	1.64314e-17	5.31028	5.72289e-19	6	7	10	388	295	318	2.506	2.423	2.156	212.39	237.698	234.051	conserved hypothetical protein
MSMEG_6664	4.90453	1.70481e-17	8.48177	5.96443e-19	200	176	274	883	591	626	83.544	60.926	59.086	483.351	476.201	460.741	methylenetetrahydrofolate reductase family protein, putative
MSMEG_1844	5.89433	1.79395e-17	5.42776	6.30443e-19	19	24	31	180	142	150	7.937	8.308	6.685	98.531	114.417	110.401	conserved hypothetical protein
MSMEG_3331	4.13964	1.85508e-17	7.87485	6.57746e-19	301	353	464	1027	548	614	125.734	122.197	100.057	562.176	441.554	451.909	hypothetical protein
MSMEG_5540	3.93916	1.85508e-17	6.61116	6.57431e-19	135	164	247	310	267	310	56.392	56.772	53.263	169.693	215.137	228.162	conserved hypothetical protein
MSMEG_6740	4.0134	2.03969e-17	5.53044	7.26405e-19	64	99	151	207	176	150	26.734	34.271	32.562	113.311	141.813	110.401	K01505 1-aminocyclopropane-1-carboxylate deaminase [EC:3.5.99.7]
MSMEG_0670	4.35796	2.07248e-17	8.0879	7.41334e-19	195	197	332	655	438	493	81.456	68.195	71.593	358.545	352.921	362.852	FAD dependent oxidoreductase
MSMEG_4367	3.77967	2.18898e-17	6.38324	7.8644e-19	67	99	163	213	129	136	27.987	34.271	35.149	116.595	103.942	100.097	K01455 formamidase [EC:3.5.1.49]
MSMEG_5341	5.55771	2.20108e-17	7.42135	7.94241e-19	98	61	142	607	398	457	40.937	21.116	30.621	332.27	320.69	336.356	dipeptidyl aminopeptidase/acylaminoacyl peptidase
MSMEG_0166	4.89404	2.29351e-17	6.66139	8.3119e-19	65	110	153	435	284	312	27.152	38.079	32.993	238.118	228.834	229.634	GntR-family protein transcriptional regulator
MSMEG_5733	3.70285	2.30957e-17	10.6233	8.40634e-19	1200	1040	1626	2439	1430	1644	501.265	360.015	350.632	1335.1	1152.23	1210	universal stress protein family protein
MSMEG_3560	7.05404	2.54403e-17	6.51549	9.29962e-19	30	22	47	538	422	415	12.532	7.616	10.135	294.499	340.029	305.443	conserved hypothetical protein
MSMEG_1204	3.59182	2.72172e-17	5.82055	9.9919e-19	51	75	133	149	87	93	21.304	25.963	28.68	81.562	70.101	68.449	K27070 meromycolic acid 3-oxoacyl-(acyl carrier protein) synthase II [EC:2.3.1.294]
MSMEG_5138	5.17481	2.88428e-17	5.65656	1.06339e-18	35	33	42	203	113	113	14.62	11.424	9.057	111.122	91.05	83.169	K00373 nitrate reductase molybdenum cofactor assembly chaperone NarJ/NarW
MSMEG_3281	3.81687	2.91431e-17	5.60645	1.07909e-18	79	94	164	226	116	168	33	32.54	35.365	123.712	93.468	123.649	K11072 spermidine/putrescine transport system ATP-binding protein [EC:7.6.2.11]
MSMEG_4356	5.63785	2.91431e-17	7.16316	1.08361e-18	83	103	174	696	581	602	34.671	35.655	37.521	380.988	468.144	443.077	K02034 peptide/nickel transport system permease protein
MSMEG_0699	4.08561	3.23227e-17	8.28481	1.21198e-18	257	436	644	946	711	691	107.354	150.929	138.873	517.837	572.892	508.581	conserved hypothetical proline rich protein
MSMEG_5406	3.658	3.23227e-17	9.05135	1.20741e-18	705	988	1673	2117	1108	1301	294.493	342.014	360.767	1158.84	892.777	957.546	hypothetical protein
MSMEG_2093	4.62179	3.47091e-17	16.7789	1.3069e-18	72483	105939	174690	256810	304050	334476	30277.6	36672.7	37670.3	140577	244990	246177	K15035 transfer-messenger RNA
MSMEG_6765	7.02606	3.81406e-17	6.39203	1.44209e-18	40	30	37	518	464	449	16.709	10.385	7.979	283.551	373.87	330.468	K01992 ABC-2 type transport system permease protein
MSMEG_2199	4.03363	4.19726e-17	6.02857	1.59356e-18	59	61	124	193	120	111	24.646	21.116	26.739	105.648	96.691	81.697	conserved hypothetical protein
MSMEG_2594	3.22213	4.53581e-17	10.7862	1.72922e-18	1947	2550	3819	3264	2463	2495	813.302	882.729	823.532	1786.7	1984.58	1836.34	K01953 asparagine synthase (glutamine-hydrolysing) [EC:6.3.5.4]
MSMEG_1769	4.9974	4.63067e-17	8.70723	1.77264e-18	230	161	319	846	753	770	96.076	55.733	68.789	463.098	606.734	566.726	UsfY protein
MSMEG_5251	4.04605	4.66432e-17	6.60209	1.79284e-18	103	125	211	310	228	227	43.025	43.271	45.5	169.693	183.712	167.074	hypothetical protein
MSMEG_4993	7.8215	4.99486e-17	7.88933	1.92773e-18	61	29	64	1479	1152	892	25.481	10.039	13.801	809.6	928.23	656.519	hypothetical protein
MSMEG_0228	3.80111	5.43332e-17	6.41135	2.10548e-18	72	101	181	240	135	147	30.076	34.963	39.031	131.375	108.777	108.193	K01768 adenylate cyclase [EC:4.6.1.1]
MSMEG_5243	3.27735	5.45007e-17	9.02878	2.12052e-18	511	485	800	807	478	603	213.455	167.892	172.513	441.749	385.151	443.813	K07005 uncharacterized protein
MSMEG_5952	8.39803	5.45213e-17	4.69856	2.12987e-18	2	6	9	230	173	212	0.835	2.077	1.941	125.901	139.396	156.034	conserved hypothetical protein, putative
MSMEG_0451	5.75274	6.31387e-17	8.45125	2.47642e-18	173	105	241	1110	922	844	72.266	36.348	51.969	607.61	742.906	621.191	oxidoreductase, FAD-linked
MSMEG_6739	5.7631	7.65754e-17	4.26321	3.01544e-18	9	13	15	93	60	67	3.759	4.5	3.235	50.908	48.345	49.313	hypothetical protein
MSMEG_3559	6.21955	7.72351e-17	5.43418	3.05354e-18	14	17	21	195	106	125	5.848	5.885	4.528	106.742	85.41	92.001	short chain dehydrogenase
MSMEG_1140	3.56977	8.17279e-17	6.41511	3.24399e-18	76	141	212	239	134	160	31.747	48.81	45.716	130.828	107.971	117.761	K00057 glycerol-3-phosphate dehydrogenase (NAD(P)+) [EC:1.1.1.94]
MSMEG_3121	3.26555	8.32821e-17	11.1629	3.31874e-18	1744	2530	3653	3064	2525	2420	728.505	875.806	787.736	1677.22	2034.53	1781.14	DNA-binding protein
MSMEG_1495	8.52495	8.60158e-17	7.87668	3.44117e-18	35	33	47	2065	1274	1241	14.62	11.424	10.135	1130.37	1026.53	913.386	HAD-superfamily protein hydrolase subfamily protein IA, variant 3,
MSMEG_1411	5.54228	8.8036e-17	5.87206	3.5358e-18	21	39	74	352	156	169	8.772	13.501	15.957	192.684	125.698	124.385	universal stress protein family protein
MSMEG_1498	3.8606	1.00393e-16	5.41079	4.04784e-18	52	55	94	142	78	93	21.721	19.039	20.27	77.73	62.849	68.449	K00140 malonate-semialdehyde dehydrogenase (acetylating) / methylmalonate-semialdehyde dehydrogenase
MSMEG_2973	3.42826	1.0085e-16	6.62683	4.08209e-18	145	196	352	304	248	220	60.569	67.849	75.906	166.409	199.827	161.922	K03768 peptidyl-prolyl cis-trans isomerase B (cyclophilin B) [EC:5.2.1.8]
MSMEG_0521	7.55208	1.02605e-16	6.98913	4.16925e-18	28	19	38	643	494	527	11.696	6.577	8.194	351.976	398.043	387.876	pseudogene
MSMEG_4318	4.9435	1.05459e-16	5.4839	4.30174e-18	30	31	61	157	109	131	12.532	10.731	13.154	85.941	87.827	96.417	hypothetical protein
MSMEG_0373	4.01219	1.05891e-16	8.38318	4.33597e-18	278	438	709	1117	635	669	116.126	151.622	152.889	611.442	511.654	492.389	K00626 acetyl-CoA C-acetyltransferase [EC:2.3.1.9]
MSMEG_3186	3.38526	1.10603e-16	9.8081	4.5463e-18	954	1078	1789	1623	1263	1333	398.505	373.169	385.781	888.425	1017.67	981.099	K01214 isoamylase [EC:3.2.1.68]
MSMEG_3477	2.68425	1.12912e-16	6.76942	4.65892e-18	294	387	597	356	230	286	122.81	133.967	128.738	194.873	185.324	210.498	possible inv protein
MSMEG_4711	8.24458	1.17087e-16	5.01782	4.84955e-18	12	9	7	435	213	252	5.013	3.116	1.509	238.118	171.626	185.474	K00167 2-oxoisovalerate dehydrogenase E1 component subunit beta [EC:1.2.4.4]
MSMEG_1778	4.58084	1.18402e-16	7.555	4.92258e-18	106	98	155	337	299	274	44.278	33.924	33.424	184.473	240.921	201.666	conserved hypothetical protein
MSMEG_5574	6.18037	1.19091e-16	6.23752	4.9886e-18	29	46	69	729	195	334	12.114	15.924	14.879	399.052	157.122	245.827	K10227 polyol transport system substrate-binding protein
MSMEG_6018	5.68602	1.19091e-16	5.38496	4.98827e-18	14	27	46	251	99	142	5.848	9.347	9.919	137.397	79.77	104.513	K10544 D-xylose transport system permease protein
MSMEG_2426	3.53647	1.20735e-16	7.78506	5.07641e-18	239	341	514	583	362	404	99.835	118.043	110.839	319.132	291.683	297.347	K04751 nitrogen regulatory protein P-II 1
MSMEG_6514	3.25321	1.25495e-16	9.64292	5.31415e-18	908	1082	1719	1517	1117	1123	379.29	374.554	370.686	830.401	900.028	826.537	K16146 maltokinase [EC:2.7.1.175]
MSMEG_6785	5.18239	1.25495e-16	6.97255	5.31592e-18	68	69	100	337	285	289	28.405	23.886	21.564	184.473	229.64	212.706	K21910 L-erythrulose 1-phosphate isomerase [EC:5.3.1.33]
MSMEG_5136	3.50425	1.25611e-16	10.1535	5.34054e-18	996	805	1411	1704	1005	1238	416.05	278.665	304.269	932.764	809.784	911.178	helix-turn-helix motif
MSMEG_3137	5.07301	1.323e-16	6.92305	5.64568e-18	70	88	126	425	311	287	29.24	30.463	27.171	232.644	250.59	211.234	oxidoreductase
MSMEG_1297	6.09025	1.36685e-16	6.44705	5.85425e-18	35	45	69	446	320	318	14.62	15.578	14.879	244.139	257.842	234.051	K18456 8-oxoguanine deaminase [EC:3.5.4.32]
MSMEG_6306	5.5422	1.38709e-16	6.04662	5.96268e-18	33	41	73	294	204	228	13.785	14.193	15.742	160.935	164.374	167.81	K01885 glutamyl-tRNA synthetase [EC:6.1.1.17]
MSMEG_5117	5.36805	1.40532e-16	5.90485	6.0631e-18	37	52	78	363	170	225	15.456	18.001	16.82	198.705	136.978	165.602	K00318 proline dehydrogenase [EC:1.5.5.2]
MSMEG_0672	4.4734	1.42197e-16	9.06361	6.17955e-18	422	409	646	1301	1056	1153	176.278	141.583	139.304	712.163	850.877	848.617	conserved hypothetical protein
MSMEG_6199	5.77169	1.42197e-16	5.29248	6.15944e-18	17	22	33	177	102	149	7.101	7.616	7.116	96.889	82.187	109.665	K18955 WhiB family transcriptional regulator, redox-sensing transcriptional regulator
MSMEG_6663	4.7401	1.47962e-16	7.33936	6.45332e-18	110	80	149	410	268	279	45.949	27.693	32.13	224.433	215.942	205.346	C5-O-methyltransferase
MSMEG_3440	3.75005	1.48048e-16	8.42116	6.48029e-18	420	567	743	862	777	839	175.443	196.277	160.221	471.856	626.072	617.511	K01752 L-serine dehydratase [EC:4.3.1.17]
MSMEG_0934	3.95265	1.50337e-16	7.16121	6.60406e-18	155	204	325	405	359	345	64.747	70.618	70.083	221.696	289.266	253.923	conserved hypothetical protein
MSMEG_0982	5.16614	1.51425e-16	4.44088	6.67562e-18	10	16	23	89	52	51	4.177	5.539	4.96	48.718	41.899	37.536	K07080 uncharacterized protein
MSMEG_0423	3.24792	1.5322e-16	6.33231	6.77879e-18	105	136	236	207	125	146	43.861	47.079	50.891	113.311	100.719	107.457	conserved hypothetical protein
MSMEG_0732	3.12616	1.57038e-16	7.3164	6.97235e-18	191	308	461	419	232	242	79.785	106.62	99.41	229.359	186.935	178.114	K03695 ATP-dependent Clp protease ATP-binding subunit ClpB
MSMEG_6084	2.68965	1.69385e-16	10.6049	7.54713e-18	2698	3887	6476	3897	2291	2661	1127.01	1345.56	1396.49	2133.2	1845.98	1958.52	pseudogene
MSMEG_5141	6.34138	1.85824e-16	4.58924	8.30872e-18	10	8	14	141	74	75	4.177	2.769	3.019	77.183	59.626	55.201	K02575 MFS transporter, NNP family, nitrate/nitrite transporter
MSMEG_0415	3.54817	1.87871e-16	7.91916	8.42973e-18	352	515	810	920	521	639	147.038	178.277	174.669	503.605	419.798	470.309	NADH-fmn oxidoreductase
MSMEG_5022	6.05233	1.88871e-16	4.9337	8.50425e-18	14	13	27	181	105	104	5.848	4.5	5.822	99.079	84.604	76.545	K07222 putative flavoprotein involved in K+ transport
MSMEG_1801	7.80561	2.00538e-16	6.5918	9.06102e-18	21	17	30	632	472	512	8.772	5.885	6.469	345.955	380.316	376.836	hypothetical protein
MSMEG_1853	3.97504	2.11821e-16	7.00474	9.6373e-18	124	131	221	304	238	249	51.797	45.348	47.657	166.409	191.77	183.266	pseudogene
MSMEG_5906	4.46554	2.11821e-16	4.77497	9.63637e-18	17	35	49	93	65	76	7.101	12.116	10.566	50.908	52.374	55.937	K22818 3-oxocholest-4-en-26-oyl-CoA dehydrogenase alpha subunit [EC:1.3.99.-]
MSMEG_0374	3.75415	2.22594e-16	5.23528	1.01624e-17	45	61	92	108	87	88	18.797	21.116	19.839	59.119	70.101	64.769	K00104 glycolate dehydrogenase FAD-linked subunit [EC:1.1.99.14]
MSMEG_6822	2.7897	2.24941e-16	9.7386	1.03048e-17	1554	1986	3246	2124	1399	1450	649.138	687.49	699.97	1162.67	1127.25	1067.21	beta-lactamase
MSMEG_5188	4.85361	2.59806e-16	7.75382	1.19835e-17	142	95	197	480	400	418	59.316	32.886	42.481	262.75	322.302	307.651	K07052 CAAX protease family protein
MSMEG_5372	3.41472	2.59806e-16	5.66857	1.19821e-17	46	57	95	101	58	66	19.215	19.732	20.486	55.287	46.734	48.577	K07646 two-component system, OmpR family, sensor histidine kinase KdpD [EC:2.7.13.3]
MSMEG_1001	4.42018	2.72583e-16	8.88728	1.26156e-17	336	386	636	1149	1037	888	140.354	133.621	137.148	628.959	835.568	653.575	acetyltransferase, gnat family protein, putative
MSMEG_5577	4.29293	2.73292e-16	6.17515	1.26913e-17	61	108	141	371	128	190	25.481	37.386	30.405	203.084	103.137	139.842	K00847 fructokinase [EC:2.7.1.4]
MSMEG_1624	7.50851	2.73366e-16	5.66663	1.27376e-17	6	14	25	457	198	241	2.506	4.846	5.391	250.16	159.539	177.378	universal stress protein family protein
MSMEG_1625	5.25304	2.76313e-16	5.03744	1.29183e-17	18	26	35	148	89	90	7.519	9	7.547	81.015	71.712	66.241	amino acid transporter, putative
MSMEG_3022	6.63461	2.7671e-16	6.33174	1.29803e-17	25	26	48	316	367	360	10.443	9	10.351	172.977	295.712	264.963	transglycosylase associated protein
MSMEG_0695	3.15408	2.87964e-16	6.94025	1.35534e-17	194	272	472	336	248	278	81.038	94.158	101.782	183.925	199.827	204.61	isoniazid inductible protein IniA
MSMEG_1810	4.47636	2.95809e-16	4.6455	1.3969e-17	28	44	79	163	86	108	11.696	15.231	17.036	89.226	69.295	79.489	hypothetical protein
MSMEG_2399	4.23149	3.01601e-16	8.52699	1.42898e-17	360	482	879	1296	1137	904	150.379	166.853	189.548	709.426	916.143	665.351	K03648 uracil-DNA glycosylase [EC:3.2.2.27]
MSMEG_1549	3.52354	3.1268e-16	7.2106	1.48638e-17	90	115	188	223	122	140	37.595	39.809	40.54	122.069	98.302	103.041	pseudogene
MSMEG_2659	3.82467	3.19996e-16	6.13611	1.53622e-17	157	214	327	503	254	317	65.582	74.08	70.515	275.34	204.662	233.315	K00259 alanine dehydrogenase [EC:1.4.1.1]
MSMEG_3563	2.93074	3.19996e-16	7.14429	1.53176e-17	179	258	359	274	187	186	74.772	89.311	77.415	149.987	150.676	136.897	drug transporter
MSMEG_6676	5.3899	3.19996e-16	5.19734	1.52895e-17	15	16	27	97	85	80	6.266	5.539	5.822	53.097	68.489	58.881	probable conserved transmembrane protein
MSMEG_1978	6.84542	3.45732e-16	9.13849	1.6652e-17	128	170	245	3021	1633	2129	53.468	58.849	52.832	1653.68	1315.8	1566.96	K04077 chaperonin GroEL [EC:5.6.1.7]
MSMEG_1966	5.17702	3.50339e-16	4.48895	1.69289e-17	16	28	27	132	61	86	6.684	9.693	5.822	72.256	49.151	63.297	hypothetical protein
MSMEG_2945	3.01198	3.56384e-16	7.43818	1.72769e-17	312	419	670	479	333	376	130.329	145.044	144.479	262.203	268.316	276.739	K03551 holliday junction DNA helicase RuvB [EC:5.6.2.4]
MSMEG_1878	3.78148	3.65145e-16	6.4736	1.77589e-17	89	133	207	274	181	170	37.177	46.04	44.638	149.987	145.842	125.121	S30AE family protein
MSMEG_3184	3.17452	3.68762e-16	9.28123	1.79926e-17	691	845	1322	1070	814	849	288.645	292.512	285.077	585.714	655.885	624.871	K01236 maltooligosyltrehalose trehalohydrolase [EC:3.2.1.141]
MSMEG_6612	5.45882	3.72512e-16	6.99591	1.8234e-17	67	47	102	357	292	330	27.987	16.27	21.995	195.421	235.28	242.883	K03924 MoxR-like ATPase [EC:3.6.3.-]
MSMEG_5389	5.68012	3.82662e-16	4.51515	1.87909e-17	13	10	34	125	81	92	5.43	3.462	7.332	68.425	65.266	67.713	LysA protein
MSMEG_1548	5.38842	3.94185e-16	5.77797	1.94186e-17	16	24	36	160	82	105	6.684	8.308	7.763	87.583	66.072	77.281	K13919 propanediol dehydratase medium subunit [EC:4.2.1.28]
MSMEG_6235	3.80217	4.00572e-16	6.09411	1.97961e-17	84	133	158	263	150	154	35.089	46.04	34.071	143.965	120.863	113.345	thiopurine S-methyltransferase (tpmt) superfamily protein
MSMEG_3574	3.42782	4.06968e-16	5.18853	2.0176e-17	49	58	98	88	70	75	20.468	20.078	21.133	48.171	56.403	55.201	TPR domain protein
MSMEG_5799	4.14862	4.1477e-16	8.11962	2.06279e-17	234	247	448	661	515	553	97.747	85.504	96.607	361.829	414.964	407.012	nucleoside-diphosphate-sugar epimerase
MSMEG_3243	4.02373	4.18931e-16	5.24665	2.09005e-17	43	53	72	132	82	80	17.962	18.347	15.526	72.256	66.072	58.881	pseudogene
MSMEG_3438	4.51235	4.28791e-16	10.2791	2.14597e-17	987	1260	1883	3146	3470	3337	412.29	436.172	406.051	1722.11	2795.97	2456.06	hypothetical protein
MSMEG_4182	3.42914	4.69907e-16	6.39793	2.35912e-17	104	104	177	180	127	133	43.443	36.001	38.168	98.531	102.331	97.889	arabinose-proton symporter
MSMEG_1076	3.79539	4.82631e-16	9.62063	2.43057e-17	688	675	1103	1576	1022	1098	287.392	233.664	237.852	862.697	823.482	808.137	K19777 acid stress chaperone HdeA
MSMEG_0418	4.52346	4.85417e-16	5.26304	2.45222e-17	20	29	39	107	47	68	8.354	10.039	8.41	58.571	37.87	50.049	K00239 succinate dehydrogenase flavoprotein subunit [EC:1.3.5.1]
MSMEG_0402	2.78696	4.85882e-16	13.1273	2.46219e-17	14652	20906	32016	18430	15373	14831	6120.44	7236.99	6903.95	10088.5	12386.9	10915.7	K16229 glycopeptidolipid biosynthesis protein
MSMEG_2593	3.15513	4.88159e-16	11.0665	2.48138e-17	2506	3394	5051	4039	3157	3104	1046.81	1174.89	1089.2	2210.93	2543.77	2284.57	gnat-family protein acetyltransferase
MSMEG_1551	3.95507	4.94228e-16	4.94619	2.51999e-17	51	60	83	171	70	93	21.304	20.77	17.898	93.605	56.403	68.449	hypothetical protein
MSMEG_5019	3.4951	5.14686e-16	5.91247	2.63238e-17	65	113	136	167	90	122	27.152	39.117	29.327	91.415	72.518	89.793	regulatory protein
MSMEG_1743	4.68386	5.48906e-16	7.21133	2.816e-17	97	109	180	365	344	335	40.519	37.732	38.815	199.8	277.18	246.563	K22769 NADPH-dependent stearoyl-CoA 9-desaturase [EC:1.14.19.-]
MSMEG_0583	4.20897	5.62638e-16	5.46836	2.89528e-17	45	52	68	153	71	109	18.797	18.001	14.664	83.752	57.209	80.225	probable membrane protein
MSMEG_2830	4.03695	6.48076e-16	7.34162	3.34511e-17	206	296	440	605	508	507	86.05	102.466	94.882	331.175	409.324	373.156	ISMsm4, transposase
MSMEG_6428	3.89955	6.83781e-16	7.31977	3.54013e-17	132	127	270	351	230	243	55.139	43.963	58.223	192.136	185.324	178.85	conserved hypothetical protein
MSMEG_1543	4.09533	7.50952e-16	7.02691	3.90681e-17	71	109	154	286	143	189	29.658	37.732	33.209	156.555	115.223	139.106	K00138 aldehyde dehydrogenase [EC:1.2.1.-]
MSMEG_3182	4.10567	7.50952e-16	5.86321	3.91145e-17	58	76	124	175	136	157	24.228	26.309	26.739	95.794	109.583	115.553	hypothetical protein
MSMEG_6405	3.09261	7.55451e-16	8.80181	3.94674e-17	892	1117	1726	1394	1057	942	372.607	386.67	372.196	763.071	851.683	693.319	Erp protein
MSMEG_3561	3.61948	8.43302e-16	5.68322	4.41894e-17	47	79	113	159	64	98	19.633	27.347	24.367	87.036	51.568	72.129	K01915 glutamine synthetase [EC:6.3.1.2]
MSMEG_5590	5.74046	8.70713e-16	8.00654	4.57623e-17	103	67	146	724	532	496	43.025	23.193	31.484	396.315	428.662	365.06	K06048 glutamate---cysteine ligase / carboxylate-amine ligase [EC:6.3.2.2 6.3.-.-]
MSMEG_5527	5.52802	9.20187e-16	6.10172	4.85069e-17	29	23	71	238	190	151	12.114	7.962	15.31	130.28	153.093	111.137	conserved hypothetical protein
MSMEG_0883	3.03864	9.2311e-16	6.15479	4.88058e-17	100	153	219	194	108	114	41.772	52.964	47.225	106.195	87.022	83.905	amidohydrolase family protein
MSMEG_3703	3.99141	9.96227e-16	8.73429	5.28278e-17	324	493	755	1268	649	767	135.341	170.661	162.809	694.099	522.935	564.518	hypothetical protein
MSMEG_5119	6.31328	1.00482e-15	6.55289	5.34412e-17	36	56	70	723	313	404	15.038	19.385	15.095	395.768	252.201	297.347	K00294 1-pyrroline-5-carboxylate dehydrogenase [EC:1.2.1.88]
MSMEG_1296	6.85603	1.025e-15	5.2035	5.46752e-17	13	11	22	214	196	163	5.43	3.808	4.744	117.143	157.928	119.969	K00365 urate oxidase [EC:1.7.3.3]
MSMEG_4951	-3.54724	1.07358e-15	7.21401	5.7435e-17	3877	5424	8359	62	39	58	1619.5	1877.62	1802.54	33.939	31.424	42.688	K02909 large subunit ribosomal protein L31
MSMEG_1400	-3.54092	1.11334e-15	7.68592	5.97368e-17	5094	7396	11719	88	60	68	2127.87	2560.26	2527.09	48.171	48.345	50.049	pseudogene
MSMEG_1315	6.50867	1.13685e-15	7.01691	6.11768e-17	37	30	52	457	363	324	15.456	10.385	11.213	250.16	292.489	238.467	K22044 moderate conductance mechanosensitive channel
MSMEG_1477	3.27358	1.15747e-15	9.57486	6.24679e-17	1065	1363	2351	1887	1441	1485	444.872	471.827	506.971	1032.94	1161.09	1092.97	K03762 MFS transporter, MHS family, proline/betaine transporter
MSMEG_3524	6.37654	1.16827e-15	4.05292	6.3234e-17	4	10	15	105	76	75	1.671	3.462	3.235	57.477	61.237	55.201	K15981 cholest-4-en-3-one 26-monooxygenase [EC:1.14.15.29]
MSMEG_1412	6.65266	1.29608e-15	5.48276	7.0355e-17	10	20	23	322	116	172	4.177	6.923	4.96	176.262	93.468	126.593	K03294 basic amino acid/polyamine antiporter, APA family
MSMEG_1132	3.65582	1.30506e-15	7.39548	7.1252e-17	189	247	362	432	314	324	78.949	85.504	78.062	236.475	253.007	238.467	K21401 menaquinone-9 beta-reductase [EC:1.3.99.38]
MSMEG_3461	3.55159	1.30506e-15	8.91201	7.1204e-17	437	626	957	1027	704	762	182.544	216.701	206.368	562.176	567.252	560.838	K03782 catalase-peroxidase [EC:1.11.1.21]
MSMEG_1999	-4.79569	1.46576e-15	5.43374	8.02557e-17	2557	3682	6098	18	15	12	1068.11	1274.59	1314.98	9.853	12.086	8.832	hypothetical protein
MSMEG_3023	3.95779	1.47103e-15	6.04986	8.07752e-17	99	91	127	260	128	152	41.354	31.501	27.386	142.323	103.137	111.873	pseudogene
MSMEG_2595	2.81673	1.54903e-15	6.01329	8.53011e-17	138	192	324	221	125	141	57.645	66.464	69.868	120.975	100.719	103.777	K01915 glutamine synthetase [EC:6.3.1.2]
MSMEG_1491	5.32503	1.56097e-15	4.53955	8.62034e-17	11	17	26	76	71	88	4.595	5.885	5.607	41.602	57.209	64.769	K00817 histidinol-phosphate aminotransferase [EC:2.6.1.9]
MSMEG_2050	6.26719	1.60365e-15	5.99912	8.8812e-17	15	16	30	182	147	174	6.266	5.539	6.469	99.626	118.446	128.065	K00343 NADH-quinone oxidoreductase subunit N [EC:7.1.1.2]
MSMEG_6919	2.76357	1.67386e-15	6.81293	9.29629e-17	295	452	765	468	272	328	123.228	156.468	164.965	256.182	219.165	241.411	proline-rich 28 kDa antigen
MSMEG_0279	5.35681	1.74396e-15	5.10248	9.71296e-17	18	17	24	87	80	93	7.519	5.885	5.175	47.624	64.46	68.449	amino acid permease
MSMEG_2747	3.2301	1.74793e-15	5.52834	9.76254e-17	61	93	147	135	79	85	25.481	32.194	31.699	73.899	63.655	62.561	pseudogene
MSMEG_0671	3.66849	1.84453e-15	9.50586	1.0331e-16	739	800	1203	1450	1116	1170	308.695	276.935	259.416	793.725	899.223	861.129	S-(hydroxymethyl)glutathione dehydrogenase
MSMEG_5485	2.66565	1.85315e-15	8.95176	1.04083e-16	913	1452	2214	1426	795	861	381.379	502.636	477.429	780.588	640.575	633.703	molybdopterin biosynthesis protein
MSMEG_3290	3.08196	1.89416e-15	8.00503	1.06684e-16	341	372	624	487	345	371	142.443	128.775	134.56	266.582	277.985	273.059	regulatory protein
MSMEG_5014	2.7276	1.93294e-15	10.891	1.09171e-16	2275	3015	4627	3077	2031	1917	950.314	1043.7	997.77	1684.34	1636.49	1410.93	K17686 P-type Cu+ transporter [EC:7.2.2.8]
MSMEG_6151	4.50079	1.94547e-15	5.07414	1.10184e-16	44	41	65	151	99	111	18.38	14.193	14.017	82.657	79.77	81.697	alpha/beta hydrolase fold-1
MSMEG_1552	4.06108	1.98586e-15	6.14356	1.12784e-16	97	99	172	338	149	191	40.519	34.271	37.09	185.02	120.057	140.578	K16238 ethanolamine permease
MSMEG_4037	7.64945	1.99349e-15	3.04283	1.1353e-16	3	2	7	93	91	86	1.253	0.692	1.509	50.908	73.324	63.297	hypothetical protein
MSMEG_1113	4.63616	2.14247e-15	5.09371	1.2235e-16	23	36	51	105	102	85	9.608	12.462	10.998	57.477	82.187	62.561	K12583 phosphatidylinositol alpha 1,6-mannosyltransferase [EC:2.4.1.-]
MSMEG_0703	2.95828	2.19193e-15	7.07495	1.25518e-16	184	310	505	315	250	228	76.861	107.312	108.899	172.43	201.439	167.81	conserved hypothetical protein
MSMEG_5526	3.76863	2.25303e-15	9.47085	1.2937e-16	693	742	1139	1607	1154	1033	289.48	256.857	245.615	879.666	929.841	760.296	peptidoglycan-binding LysM
MSMEG_4992	4.82026	2.39968e-15	7.56691	1.38168e-16	190	235	340	878	697	726	79.367	81.35	73.318	480.614	561.611	534.342	hypothetical protein
MSMEG_5489	-5.41453	2.45491e-15	5.63961	1.41733e-16	2701	3863	5908	15	8	7	1128.26	1337.25	1274.01	8.211	6.446	5.152	K02911 large subunit ribosomal protein L32
MSMEG_0747	5.9482	2.588e-15	4.67016	1.49823e-16	9	9	19	112	57	82	3.759	3.116	4.097	61.308	45.928	60.353	K07402 xanthine dehydrogenase accessory factor
MSMEG_2597	3.47541	2.61003e-15	6.07023	1.51508e-16	110	138	212	261	142	152	45.949	47.771	45.716	142.871	114.417	111.873	aldehyde dehydrogenase
MSMEG_5398	2.90405	2.63868e-15	6.36482	1.53585e-16	160	253	326	229	167	189	66.835	87.581	70.299	125.354	134.561	139.106	K07485 transposase
MSMEG_4537	3.30544	2.65158e-15	5.7236	1.54752e-16	69	97	147	145	98	87	28.823	33.578	31.699	79.373	78.964	64.033	major membrane protein I
MSMEG_5352	4.06181	2.7367e-15	6.88404	1.60149e-16	129	177	258	463	241	318	53.886	61.272	55.635	253.445	194.187	234.051	K06975 uncharacterized protein
MSMEG_1184	3.93556	2.75581e-15	6.78163	1.617e-16	94	113	179	292	151	197	39.266	39.117	38.6	159.84	121.669	144.994	K27358 cutinase-like protein [EC:3.1.1.-]
MSMEG_1742	4.70078	2.89914e-15	9.44398	1.70565e-16	393	490	759	1729	1413	1374	164.164	169.622	163.671	946.449	1138.53	1011.27	K22770 stearoyl-CoA 9-desaturase NADPH oxidoreductase
MSMEG_2259	3.27445	2.91691e-15	7.25976	1.72067e-16	194	332	500	492	264	294	81.038	114.928	107.82	269.319	212.719	216.386	K06200 carbon starvation protein
MSMEG_6354	6.75086	2.93398e-15	9.92422	1.73535e-16	286	242	444	4476	3232	3418	119.468	83.773	95.744	2450.15	2604.2	2515.68	K27358 cutinase-like protein [EC:3.1.1.-]
MSMEG_4562	5.39042	2.9519e-15	4.78111	1.75057e-16	17	27	36	144	124	94	7.101	9.347	7.763	78.825	99.914	69.185	pseudogene
MSMEG_4205	3.79804	2.99903e-15	5.45082	1.78323e-16	35	51	83	112	68	70	14.62	17.655	17.898	61.308	54.791	51.521	putative transcriptional regulator
MSMEG_0600	6.0545	3.36178e-15	5.7018	2.00763e-16	17	14	38	163	163	150	7.101	4.846	8.194	89.226	131.338	110.401	dehydrogenase
MSMEG_5407	2.67737	3.36178e-15	5.99094	2.00948e-16	155	217	342	222	110	158	64.747	75.119	73.749	121.522	88.633	116.289	K07238 zinc transporter, ZIP family
MSMEG_0651	4.52717	3.46402e-15	6.37483	2.07602e-16	48	57	108	190	151	173	20.051	19.732	23.289	104.005	121.669	127.329	putative conserved exported protein
MSMEG_3955	4.36195	3.62244e-15	7.95537	2.17664e-16	134	80	160	377	189	250	55.975	27.693	34.503	206.369	152.288	184.002	conserved hypothetical protein
MSMEG_3050	-4.00899	3.68239e-15	8.48032	2.21845e-16	11051	16144	26197	163	92	94	4616.23	5588.54	5649.14	89.226	74.129	69.185	integration host factor
MSMEG_3464	3.38334	3.69586e-15	5.98025	2.23236e-16	63	104	145	164	85	100	26.316	36.001	31.268	89.773	68.489	73.601	K00001 alcohol dehydrogenase [EC:1.1.1.1]
MSMEG_1561	3.23513	3.87512e-15	5.90099	2.34671e-16	84	108	146	140	98	102	35.089	37.386	31.484	76.636	78.964	75.073	LysR-family protein trancsriptional regulator
MSMEG_5434	4.61213	3.91609e-15	5.32629	2.37767e-16	49	59	83	201	147	150	20.468	20.424	17.898	110.027	118.446	110.401	hypothetical protein
MSMEG_2427	3.48584	3.94374e-15	6.83441	2.40065e-16	111	146	248	230	191	171	46.367	50.541	53.479	125.901	153.899	125.857	K00990 [protein-PII] uridylyltransferase [EC:2.7.7.59]
MSMEG_6512	2.73735	3.95574e-15	6.61528	2.41415e-16	200	268	421	237	204	182	83.544	92.773	90.785	129.733	164.374	133.953	acyl-CoA dehydrogenase domain protein
MSMEG_3158	2.38742	4.05782e-15	7.73007	2.48282e-16	497	657	1140	522	348	383	207.607	227.433	245.83	285.741	280.403	281.891	K01847 methylmalonyl-CoA mutase [EC:5.4.99.2]
MSMEG_1519	-4.03172	4.31177e-15	6.95282	2.64497e-16	3661	5023	7368	42	24	38	1529.28	1738.8	1588.84	22.991	19.338	27.968	K02518 translation initiation factor IF-1
MSMEG_3471	3.65715	4.3572e-15	6.1381	2.67967e-16	83	105	191	254	122	140	34.671	36.348	41.187	139.039	98.302	103.041	GTP cyclohydrolase
MSMEG_2596	3.38439	4.37857e-15	5.10172	2.70656e-16	56	80	106	106	72	91	23.392	27.693	22.858	58.024	58.014	66.977	K07010 putative glutamine amidotransferase
MSMEG_5559	5.01176	4.37857e-15	5.45272	2.70307e-16	23	15	57	129	88	87	9.608	5.193	12.292	70.614	70.906	64.033	metabolite/sugar transport protein
MSMEG_5953	8.35766	4.68653e-15	3.99363	2.90427e-16	4	1	8	147	144	130	1.671	0.346	1.725	80.467	116.029	95.681	hypothetical protein
MSMEG_1971	7.94141	4.70016e-15	7.7637	2.92009e-16	28	34	57	1545	740	945	11.696	11.77	12.292	845.728	596.259	695.528	K18223 propane 2-monooxygenase large subunit [EC:1.14.13.227]
MSMEG_6662	2.27085	4.74774e-15	6.37405	2.95709e-16	234	358	513	225	166	169	97.747	123.928	110.624	123.164	133.755	124.385	short chain dehydrogenase
MSMEG_4719	2.64145	4.76102e-15	6.94534	2.97284e-16	269	354	616	333	238	235	112.367	122.544	132.835	182.283	191.77	172.962	peptidase S9, prolyl oligopeptidase
MSMEG_5650	3.74137	5.39705e-15	4.55401	3.38119e-16	20	32	54	67	43	40	8.354	11.077	11.645	36.676	34.647	29.44	K01895 acetyl-CoA synthetase [EC:6.2.1.1]
MSMEG_6610	4.75883	5.39705e-15	6.57464	3.38691e-16	61	48	75	192	157	172	25.481	16.616	16.173	105.1	126.504	126.593	protein of unknown function DUF58, putative
MSMEG_3543	4.63036	5.46533e-15	8.51992	3.43834e-16	243	211	354	737	705	682	101.506	73.041	76.337	403.431	568.057	501.957	soluble secreted antigen MPT53
MSMEG_5218	4.68433	5.47342e-15	4.74602	3.45202e-16	22	23	42	88	86	66	9.19	7.962	9.057	48.171	69.295	48.577	conserved hypothetical protein
MSMEG_5672	-3.14476	5.48329e-15	6.13404	3.46685e-16	1717	2363	3711	38	22	32	717.226	817.995	800.243	20.801	17.727	23.552	K01647 citrate synthase [EC:2.3.3.1]
MSMEG_6257	-3.47258	5.51597e-15	6.08931	3.49616e-16	1660	2531	3645	31	20	22	693.416	876.152	786.01	16.969	16.115	16.192	K00928 aspartate kinase [EC:2.7.2.4]
MSMEG_2060	7.23491	5.81692e-15	6.43275	3.70364e-16	16	9	30	410	206	252	6.684	3.116	6.469	224.433	165.986	185.474	K00333 NADH-quinone oxidoreductase subunit D [EC:7.1.1.2]
MSMEG_4565	6.78939	5.81692e-15	4.8502	3.70516e-16	6	10	18	141	135	129	2.506	3.462	3.882	77.183	108.777	94.945	oxidoreductase
MSMEG_1239	3.57691	6.34235e-15	7.59262	4.04979e-16	277	454	662	677	496	553	115.709	157.16	142.754	370.588	399.654	407.012	ISMsm4, transposase
MSMEG_4560	-3.6809	6.35956e-15	6.68678	4.07076e-16	2771	4327	6792	38	39	35	1157.5	1497.87	1464.63	20.801	31.424	25.76	K02016 iron complex transport system substrate-binding protein
MSMEG_4338	3.46685	6.53935e-15	4.89826	4.1961e-16	47	71	99	124	69	66	19.633	24.578	21.348	67.877	55.597	48.577	possible transcriptional regulatory protein
MSMEG_0289	3.63197	6.83555e-15	5.81284	4.39689e-16	66	72	123	129	111	102	27.57	24.924	26.524	70.614	89.439	75.073	alpha/beta hydrolase fold family protein
MSMEG_0383	2.18265	7.11979e-15	9.75528	4.59089e-16	1726	2402	3707	1432	1109	1183	720.986	831.496	799.38	783.872	893.582	870.697	conserved hypothetical protein
MSMEG_1421	3.37368	7.24651e-15	7.13529	4.68397e-16	102	135	277	250	158	144	42.607	46.733	59.732	136.849	127.309	105.985	K24694 mycofactocin precursor peptide MftA
MSMEG_4361	3.65773	7.41356e-15	4.77753	4.80358e-16	42	38	76	87	58	62	17.544	13.154	16.389	47.624	46.734	45.632	conserved hypothetical protein
MSMEG_0260	3.32475	8.79551e-15	5.57478	5.7128e-16	60	71	163	124	96	82	25.063	24.578	35.149	67.877	77.352	60.353	DNA-binding protein
MSMEG_2052	8.97562	8.80551e-15	6.30108	5.73311e-16	1	10	16	452	336	374	0.418	3.462	3.45	247.423	270.734	275.267	K00341 NADH-quinone oxidoreductase subunit L [EC:7.1.1.2]
MSMEG_2051	8.28901	8.91262e-15	5.24338	5.81683e-16	3	5	4	174	126	144	1.253	1.731	0.863	95.247	101.525	105.985	K00342 NADH-quinone oxidoreductase subunit M [EC:7.1.1.2]
MSMEG_2171	7.87937	9.09018e-15	4.41368	5.94698e-16	3	2	11	160	117	100	1.253	0.692	2.372	87.583	94.273	73.601	L-carnitine dehydratase/bile acid-inducible protein F
MSMEG_1838	2.80653	9.0902e-15	6.26246	5.96126e-16	99	128	215	128	88	109	41.354	44.31	46.363	70.067	70.906	80.225	K03294 basic amino acid/polyamine antiporter, APA family
MSMEG_5302	4.08295	9.23498e-15	9.00792	6.07299e-16	494	580	1026	1564	1103	1082	206.354	200.778	221.247	856.128	888.748	796.361	K11103 aerobic C4-dicarboxylate transport protein
MSMEG_6181	2.80901	9.23498e-15	6.1876	6.08518e-16	145	210	319	189	133	175	60.569	72.695	68.789	103.458	107.165	128.801	conserved hypothetical protein
MSMEG_0417	4.24622	9.24667e-15	4.9356	6.10739e-16	20	27	51	91	39	72	8.354	9.347	10.998	49.813	31.424	52.993	K00240 succinate dehydrogenase iron-sulfur subunit [EC:1.3.5.1]
MSMEG_5903	2.47294	9.80469e-15	6.6258	6.49134e-16	176	289	412	237	131	149	73.519	100.043	88.844	129.733	105.554	109.665	oxidoreductase, short chain dehydrogenase/reductase family protein
MSMEG_2525	3.79534	9.96225e-15	5.18404	6.61128e-16	46	61	97	128	87	86	19.215	21.116	20.917	70.067	70.101	63.297	K20265 glutamate:GABA antiporter
MSMEG_1077	2.87207	1.03013e-14	8.14917	6.85246e-16	333	427	755	500	329	334	139.101	147.814	162.809	273.698	265.093	245.827	conserved hypothetical protein
MSMEG_5267	2.97611	1.14261e-14	7.73963	7.61859e-16	351	520	820	657	359	402	146.62	180.007	176.825	359.64	289.266	295.875	K00252 glutaryl-CoA dehydrogenase [EC:1.3.8.6]
MSMEG_4756	-3.09938	1.17519e-14	6.96748	7.85429e-16	2539	3781	6273	70	40	42	1060.59	1308.86	1352.71	38.318	32.23	30.912	K00997 holo-[acyl-carrier protein] synthase [EC:2.7.8.7]
MSMEG_1220	3.9263	1.1837e-14	4.4688	7.9297e-16	23	28	54	75	37	59	9.608	9.693	11.645	41.055	29.813	43.424	K01997 branched-chain amino acid transport system permease protein
MSMEG_1758	9.13315	1.24705e-14	6.52678	8.37368e-16	9	9	11	697	563	533	3.759	3.116	2.372	381.535	453.64	392.292	hypothetical protein
MSMEG_1426	3.2555	1.26067e-14	9.01581	8.49766e-16	575	729	1228	967	817	743	240.189	252.357	264.807	529.333	658.302	546.854	K24698 mycofactocin glycosyltransferase
MSMEG_3564	2.96987	1.26067e-14	9.71237	8.50465e-16	1402	1759	2744	2268	1167	1590	585.644	608.91	591.718	1241.5	940.316	1170.25	K03594 bacterioferritin [EC:1.16.3.1]
MSMEG_6214	2.67736	1.41138e-14	5.80902	9.54353e-16	105	128	218	123	77	105	43.861	44.31	47.01	67.33	62.043	77.281	K09117 uncharacterized protein
MSMEG_1785	5.19006	1.49895e-14	4.24581	1.01592e-15	9	11	20	74	45	41	3.759	3.808	4.313	40.507	36.259	30.176	hypothetical protein
MSMEG_1286	2.37123	1.56096e-14	6.89212	1.06039e-15	217	256	388	212	131	137	90.645	88.619	83.669	116.048	105.554	100.833	sulfatase family protein
MSMEG_2928	3.25248	1.59789e-14	6.02713	1.08799e-15	72	91	211	145	100	115	30.076	31.501	45.5	79.373	80.576	84.641	conserved hypothetical protein
MSMEG_2061	7.29783	1.69653e-14	4.68013	1.15782e-15	2	9	7	142	70	89	0.835	3.116	1.509	77.73	56.403	65.505	K00332 NADH-quinone oxidoreductase subunit C [EC:7.1.1.2]
MSMEG_2657	-5.80684	1.70893e-14	4.91095	1.16896e-15	1231	1733	2611	3	3	3	514.214	599.91	563.038	1.642	2.417	2.208	peptidase, M16 family protein
MSMEG_2884	5.56571	1.71546e-14	4.08682	1.17611e-15	8	20	16	81	71	66	3.342	6.923	3.45	44.339	57.209	48.577	cyclohexanone monooxygenase
MSMEG_3531	-4.52445	1.79738e-14	5.3244	1.23792e-15	1236	1844	2694	10	8	7	516.303	638.334	580.936	5.474	6.446	5.152	conserved hypothetical protein
MSMEG_5152	4.58761	1.79738e-14	4.41822	1.23584e-15	20	20	53	121	53	64	8.354	6.923	11.429	66.235	42.705	47.105	hypothetical protein
MSMEG_2917	3.63974	1.80698e-14	6.17976	1.24737e-15	61	105	149	229	101	103	25.481	36.348	32.13	125.354	81.381	75.809	hypothetical protein
MSMEG_1977	6.39723	2.00495e-14	7.89427	1.38717e-15	64	76	121	1105	582	708	26.734	26.309	26.093	604.873	468.949	521.094	K18382 NAD+-dependent secondary alcohol dehydrogenase Adh1 [EC:1.1.1.-]
MSMEG_5769	2.98929	2.03657e-14	6.96729	1.41224e-15	233	246	432	385	184	223	97.329	85.157	93.157	210.748	148.259	164.13	hypothetical protein
MSMEG_4195	3.512	2.0741e-14	7.83909	1.44152e-15	275	256	462	465	356	377	114.873	88.619	99.626	254.539	286.849	277.475	conserved hypothetical protein
MSMEG_3614	3.96768	2.11731e-14	3.97842	1.47487e-15	17	25	39	57	39	39	7.101	8.654	8.41	31.202	31.424	28.704	hypothetical protein
MSMEG_5328	2.73844	2.34695e-14	8.81882	1.63852e-15	596	665	1147	592	483	617	248.961	230.202	247.34	324.059	389.18	454.117	conserved hypothetical protein
MSMEG_1759	10.1294	2.45084e-14	3.34883	1.7149e-15	1	0	0	84	92	91	0.418	0	0	45.981	74.129	66.977	hypothetical protein
MSMEG_5246	2.11114	2.46949e-14	10.227	1.73182e-15	1986	2058	3429	1469	949	1048	829.593	712.414	739.432	804.126	764.662	771.336	conserved hypothetical protein
MSMEG_4237	2.73588	2.51141e-14	9.38078	1.76516e-15	1286	1682	2672	1666	1062	1256	537.189	582.255	576.192	911.963	855.712	924.426	probable conserved transmembrane protein
MSMEG_3946	3.1234	2.76933e-14	8.91875	1.95078e-15	457	308	580	530	332	392	190.898	106.62	125.072	290.12	267.511	288.515	probable conserved transmembrane protein
MSMEG_0249	2.76748	2.81941e-14	6.1544	1.99049e-15	150	216	341	236	145	132	62.658	74.772	73.533	129.186	116.834	97.153	K20469 putative heme transporter
MSMEG_2599	3.93373	2.83599e-14	5.47117	2.01109e-15	68	81	144	235	109	142	28.405	28.04	31.052	128.638	87.827	104.513	GntR-family protein transcriptional regulator
MSMEG_6179	2.13274	2.83599e-14	8.14569	2.01029e-15	459	723	1166	481	263	336	191.734	250.28	251.437	263.298	211.914	247.299	K01895 acetyl-CoA synthetase [EC:6.2.1.1]
MSMEG_5790	-4.3841	2.84314e-14	6.59861	2.02062e-15	2198	3088	5129	22	19	11	918.15	1068.97	1106.02	12.043	15.309	8.096	SseC protein
MSMEG_2744	2.81596	2.8465e-14	5.71529	2.02747e-15	98	130	173	135	78	91	40.937	45.002	37.306	73.899	62.849	66.977	thymidylate synthase
MSMEG_3271	5.72585	3.10924e-14	5.58024	2.2195e-15	40	55	81	521	224	295	16.709	19.039	17.467	285.194	180.489	217.122	K20902 D-erythrulose 4-kinase [EC:2.7.1.210]
MSMEG_6652	9.19817	3.13151e-14	3.29988	2.24031e-15	1	1	2	131	107	104	0.418	0.346	0.431	71.709	86.216	76.545	hypothetical protein
MSMEG_5834	3.28047	3.27565e-14	5.66477	2.34856e-15	74	99	152	130	106	98	30.911	34.271	32.777	71.162	85.41	72.129	metallo-beta-lactamase superfamily protein
MSMEG_4920	-3.34159	3.31712e-14	6.20625	2.3835e-15	2027	3117	4940	39	32	31	846.72	1079.01	1065.27	21.348	25.784	22.816	K00626 acetyl-CoA C-acetyltransferase [EC:2.3.1.9]
MSMEG_2497	3.17976	3.3251e-14	4.97767	2.39445e-15	62	67	117	98	55	85	25.899	23.193	25.23	53.645	44.317	62.561	K02433 aspartyl-tRNA(Asn)/glutamyl-tRNA(Gln) amidotransferase subunit A [EC:6.3.5.6 6.3.5.7]
MSMEG_3885	-3.36418	3.32995e-14	6.40116	2.40316e-15	1291	2001	2744	28	15	18	539.277	692.683	591.718	15.327	12.086	13.248	K03727 ATP-dependent RNA helicase HelY [EC:5.6.2.6]
MSMEG_1193	3.23657	3.38732e-14	7.56114	2.44988e-15	215	357	542	476	317	303	89.81	123.582	116.877	260.561	255.424	223.01	K11089 60 kDa SS-A/Ro ribonucleoprotein
MSMEG_3103	1.96859	3.39329e-14	8.1637	2.46485e-15	738	968	1408	535	350	417	308.278	335.091	303.622	292.857	282.014	306.915	K00615 transketolase [EC:2.2.1.1]
MSMEG_6305	9.0064	3.39329e-14	7.09608	2.46108e-15	22	8	24	931	793	996	9.19	2.769	5.175	509.626	638.964	733.064	conserved hypothetical protein
MSMEG_2056	8.46723	3.73268e-14	4.91535	2.71723e-15	3	3	5	203	133	137	1.253	1.039	1.078	111.122	107.165	100.833	K00337 NADH-quinone oxidoreductase subunit H [EC:7.1.1.2]
MSMEG_2136	3.15459	3.97321e-14	5.87288	2.89856e-15	84	121	204	180	81	130	35.089	41.886	43.991	98.531	65.266	95.681	K01835 phosphoglucomutase [EC:5.4.2.2]
MSMEG_2519	-2.94652	4.02435e-14	6.49952	2.94219e-15	1729	2498	3805	39	38	32	722.239	864.728	820.513	21.348	30.619	23.552	K02967 small subunit ribosomal protein S2
MSMEG_6361	2.54258	4.07282e-14	7.88303	2.98401e-15	374	621	969	576	303	332	156.227	214.97	208.956	315.3	244.144	244.355	transcriptional regulator, MarR family protein
MSMEG_2540	-3.10339	4.21779e-14	6.40179	3.09684e-15	1750	2545	3880	44	26	29	731.011	880.998	836.686	24.085	20.95	21.344	K09903 uridylate kinase [EC:2.7.4.22]
MSMEG_5359	4.33576	4.23846e-14	4.48993	3.11867e-15	19	28	47	110	49	50	7.937	9.693	10.135	60.214	39.482	36.8	K01725 cyanate lyase [EC:4.2.1.104]
MSMEG_3935	2.94352	4.2978e-14	9.12842	3.16907e-15	600	481	721	664	366	496	250.632	166.507	155.477	363.471	294.906	365.06	conserved hypothetical protein
MSMEG_1254	2.04892	4.53168e-14	8.04056	3.34896e-15	608	778	1149	465	322	333	253.974	269.319	247.771	254.539	259.453	245.091	DEAD/DEAH box helicase
MSMEG_5867	3.58738	4.53168e-14	4.10674	3.35575e-15	21	30	42	55	34	31	8.772	10.385	9.057	30.107	27.396	22.816	K01822 steroid Delta-isomerase [EC:5.3.3.1]
MSMEG_3535	2.65322	4.64715e-14	5.98537	3.44854e-15	100	163	266	171	85	96	41.772	56.425	57.36	93.605	68.489	70.657	K01480 agmatinase [EC:3.5.3.11]
MSMEG_4527	-3.68929	4.64927e-14	5.81284	3.45741e-15	1266	1789	2768	23	10	14	528.834	619.295	596.894	12.59	8.058	10.304	K00392 sulfite reductase (ferredoxin) [EC:1.8.7.1]
MSMEG_3222	-3.58256	4.65921e-14	6.76833	3.47211e-15	2046	3155	4655	35	26	24	854.656	1092.16	1003.81	19.159	20.95	17.664	K13292 phosphatidylglycerol---prolipoprotein diacylglyceryl transferase [EC:2.5.1.145]
[truncated: 2,547 more rows]
