# Supplementary material for: MnoSR removal in Mycobacterium smegmatis triggers broad transcriptional response to 1,3-propanediol and glucose as sole carbon sources
Source: Front Cell Infect Microbiol. 2024 Jul 24;14:1427829. doi: 10.3389/fcimb.2024.1427829 (PMC11303327; doi:10.3389/fcimb.2024.1427829)
Supplement: Supplementary file 3 [file Table_2.xlsx]

## Sheet: WT2%glucose vs. WT0.1%glucose
Supplementary Table
Gene Ontology (GO) enrichment with ShinyGo 0.80
Downexpressed under carbon starvation conditions
Enrichment FDR	nGenes	Pathway Genes	Fold Enrichment	Pathway	URL	Genes
8.43e-31	93	133	3.33288	Translation, and protein export		MSMEG_1339 MSMEG_1346 MSMEG_1347 MSMEG_1364 MSMEG_1365 MSMEG_1367 MSMEG_1368 MSMEG_1398 MSMEG_1399 MSMEG_1401 MSMEG_1435 MSMEG_1436 MSMEG_1437 MSMEG_1438 MSMEG_1439 MSMEG_1440 MSMEG_1441 MSMEG_1442 MSMEG_1443 MSMEG_1444 MSMEG_1445 MSMEG_1465 MSMEG_1466 MSMEG_1467 MSMEG_1468 MSMEG_1469 MSMEG_1483 MSMEG_1519 MSMEG_1520 MSMEG_1521 MSMEG_1522 MSMEG_1523 MSMEG_1524 MSMEG_1525 MSMEG_1527 MSMEG_1540 MSM…
5.34e-29	106	170	2.97198	Mixed, incl. translation, and protein export		MSMEG_0832 MSMEG_1316 MSMEG_1339 MSMEG_1346 MSMEG_1347 MSMEG_1364 MSMEG_1365 MSMEG_1367 MSMEG_1368 MSMEG_1398 MSMEG_1399 MSMEG_1401 MSMEG_1435 MSMEG_1436 MSMEG_1437 MSMEG_1438 MSMEG_1439 MSMEG_1440 MSMEG_1441 MSMEG_1442 MSMEG_1443 MSMEG_1444 MSMEG_1445 MSMEG_1465 MSMEG_1466 MSMEG_1467 MSMEG_1468 MSMEG_1469 MSMEG_1483 MSMEG_1485 MSMEG_1519 MSMEG_1520 MSMEG_1521 MSMEG_1522 MSMEG_1523 MSMEG_1524 MSM…
4.38e-27	81	116	3.32825	Translation, and rna processing		MSMEG_1339 MSMEG_1346 MSMEG_1347 MSMEG_1364 MSMEG_1365 MSMEG_1367 MSMEG_1368 MSMEG_1398 MSMEG_1399 MSMEG_1401 MSMEG_1435 MSMEG_1436 MSMEG_1437 MSMEG_1438 MSMEG_1439 MSMEG_1440 MSMEG_1441 MSMEG_1442 MSMEG_1443 MSMEG_1444 MSMEG_1445 MSMEG_1465 MSMEG_1466 MSMEG_1467 MSMEG_1468 MSMEG_1469 MSMEG_1519 MSMEG_1520 MSMEG_1521 MSMEG_1522 MSMEG_1523 MSMEG_1524 MSMEG_1525 MSMEG_1527 MSMEG_1540 MSMEG_1556 MSM…
1.01e-25	76	108	3.35412	Translation, and rna polymerase		MSMEG_1339 MSMEG_1346 MSMEG_1347 MSMEG_1364 MSMEG_1365 MSMEG_1367 MSMEG_1368 MSMEG_1398 MSMEG_1399 MSMEG_1401 MSMEG_1435 MSMEG_1436 MSMEG_1437 MSMEG_1438 MSMEG_1439 MSMEG_1440 MSMEG_1441 MSMEG_1442 MSMEG_1443 MSMEG_1444 MSMEG_1445 MSMEG_1465 MSMEG_1466 MSMEG_1467 MSMEG_1468 MSMEG_1469 MSMEG_1519 MSMEG_1520 MSMEG_1521 MSMEG_1522 MSMEG_1523 MSMEG_1524 MSMEG_1525 MSMEG_1527 MSMEG_1556 MSMEG_1557 MSM…
5.17e-25	73	103	3.37812	Translation		MSMEG_1339 MSMEG_1346 MSMEG_1347 MSMEG_1364 MSMEG_1365 MSMEG_1367 MSMEG_1368 MSMEG_1398 MSMEG_1399 MSMEG_1401 MSMEG_1435 MSMEG_1436 MSMEG_1437 MSMEG_1438 MSMEG_1439 MSMEG_1440 MSMEG_1441 MSMEG_1442 MSMEG_1443 MSMEG_1444 MSMEG_1445 MSMEG_1465 MSMEG_1466 MSMEG_1467 MSMEG_1468 MSMEG_1469 MSMEG_1519 MSMEG_1520 MSMEG_1521 MSMEG_1522 MSMEG_1523 MSMEG_1524 MSMEG_1525 MSMEG_1556 MSMEG_1557 MSMEG_2091 MSM…
9.64e-24	64	86	3.54707	Ribosome, and translation regulator activity		MSMEG_1339 MSMEG_1346 MSMEG_1347 MSMEG_1364 MSMEG_1365 MSMEG_1367 MSMEG_1368 MSMEG_1398 MSMEG_1399 MSMEG_1401 MSMEG_1435 MSMEG_1436 MSMEG_1437 MSMEG_1438 MSMEG_1439 MSMEG_1440 MSMEG_1441 MSMEG_1442 MSMEG_1443 MSMEG_1444 MSMEG_1445 MSMEG_1465 MSMEG_1466 MSMEG_1467 MSMEG_1468 MSMEG_1469 MSMEG_1519 MSMEG_1520 MSMEG_1521 MSMEG_1522 MSMEG_1523 MSMEG_1524 MSMEG_1525 MSMEG_1556 MSMEG_1557 MSMEG_2091 MSM…
1.85e-23	58	74	3.73581	Ribosome		MSMEG_1339 MSMEG_1346 MSMEG_1347 MSMEG_1364 MSMEG_1365 MSMEG_1398 MSMEG_1399 MSMEG_1401 MSMEG_1435 MSMEG_1436 MSMEG_1437 MSMEG_1438 MSMEG_1439 MSMEG_1440 MSMEG_1441 MSMEG_1442 MSMEG_1443 MSMEG_1444 MSMEG_1445 MSMEG_1465 MSMEG_1466 MSMEG_1467 MSMEG_1468 MSMEG_1469 MSMEG_1519 MSMEG_1520 MSMEG_1521 MSMEG_1522 MSMEG_1523 MSMEG_1525 MSMEG_1556 MSMEG_1557 MSMEG_2091 MSMEG_2435 MSMEG_2437 MSMEG_2438 MSM…
2.83e-22	53	66	3.82755	Structural constituent of ribosome		MSMEG_1339 MSMEG_1346 MSMEG_1347 MSMEG_1364 MSMEG_1365 MSMEG_1398 MSMEG_1399 MSMEG_1401 MSMEG_1435 MSMEG_1436 MSMEG_1437 MSMEG_1438 MSMEG_1439 MSMEG_1440 MSMEG_1441 MSMEG_1442 MSMEG_1443 MSMEG_1444 MSMEG_1445 MSMEG_1465 MSMEG_1466 MSMEG_1467 MSMEG_1468 MSMEG_1469 MSMEG_1519 MSMEG_1520 MSMEG_1521 MSMEG_1522 MSMEG_1523 MSMEG_1525 MSMEG_1556 MSMEG_1557 MSMEG_2091 MSMEG_2435 MSMEG_2440 MSMEG_2519 MSM…
5.26e-20	47	58	3.86241	Ribosomal protein		MSMEG_1339 MSMEG_1346 MSMEG_1347 MSMEG_1364 MSMEG_1365 MSMEG_1398 MSMEG_1399 MSMEG_1435 MSMEG_1436 MSMEG_1437 MSMEG_1438 MSMEG_1439 MSMEG_1440 MSMEG_1441 MSMEG_1442 MSMEG_1443 MSMEG_1444 MSMEG_1445 MSMEG_1465 MSMEG_1466 MSMEG_1467 MSMEG_1468 MSMEG_1469 MSMEG_1520 MSMEG_1521 MSMEG_1522 MSMEG_1523 MSMEG_1525 MSMEG_1556 MSMEG_1557 MSMEG_2435 MSMEG_2440 MSMEG_2519 MSMEG_2654 MSMEG_3791 MSMEG_3792 MSM…
1.92e-19	47	59	3.79695	Ribonucleoprotein		MSMEG_1339 MSMEG_1346 MSMEG_1347 MSMEG_1364 MSMEG_1365 MSMEG_1398 MSMEG_1399 MSMEG_1435 MSMEG_1436 MSMEG_1437 MSMEG_1438 MSMEG_1439 MSMEG_1440 MSMEG_1441 MSMEG_1442 MSMEG_1443 MSMEG_1444 MSMEG_1445 MSMEG_1465 MSMEG_1466 MSMEG_1467 MSMEG_1468 MSMEG_1469 MSMEG_1520 MSMEG_1521 MSMEG_1522 MSMEG_1523 MSMEG_1525 MSMEG_1556 MSMEG_1557 MSMEG_2435 MSMEG_2440 MSMEG_2519 MSMEG_2654 MSMEG_3791 MSMEG_3792 MSM…
3.47e-17	50	70	3.40456	RNA-binding		MSMEG_1346 MSMEG_1347 MSMEG_1364 MSMEG_1398 MSMEG_1399 MSMEG_1436 MSMEG_1437 MSMEG_1438 MSMEG_1439 MSMEG_1440 MSMEG_1441 MSMEG_1442 MSMEG_1443 MSMEG_1445 MSMEG_1465 MSMEG_1466 MSMEG_1467 MSMEG_1468 MSMEG_1469 MSMEG_1519 MSMEG_1521 MSMEG_1522 MSMEG_1523 MSMEG_1646 MSMEG_1889 MSMEG_2091 MSMEG_2436 MSMEG_2654 MSMEG_2656 MSMEG_2685 MSMEG_2931 MSMEG_3036 MSMEG_3175 MSMEG_3740 MSMEG_3751 MSMEG_3777 MSM…
4.16e-16	120	272	2.10282	Cytoplasm		MSMEG_6947 MSMEG_0001 MSMEG_0005 MSMEG_0006 MSMEG_0057 MSMEG_0059 MSMEG_0615 MSMEG_0759 MSMEG_0783 MSMEG_0784 MSMEG_0922 MSMEG_0928 MSMEG_0943 MSMEG_1014 MSMEG_1316 MSMEG_1401 MSMEG_1484 MSMEG_1519 MSMEG_1568 MSMEG_1580 MSMEG_1582 MSMEG_1597 MSMEG_1636 MSMEG_1651 MSMEG_1811 MSMEG_1843 MSMEG_1881 MSMEG_1889 MSMEG_2086 MSMEG_2091 MSMEG_2379 MSMEG_2395 MSMEG_2414 MSMEG_2437 MSMEG_2438 MSMEG_2442 MSM…
1.27e-13	33	41	3.83636	rRNA-binding		MSMEG_1346 MSMEG_1347 MSMEG_1364 MSMEG_1398 MSMEG_1399 MSMEG_1436 MSMEG_1437 MSMEG_1438 MSMEG_1439 MSMEG_1440 MSMEG_1441 MSMEG_1442 MSMEG_1443 MSMEG_1445 MSMEG_1465 MSMEG_1466 MSMEG_1467 MSMEG_1468 MSMEG_1469 MSMEG_1519 MSMEG_1521 MSMEG_1522 MSMEG_1523 MSMEG_1889 MSMEG_2654 MSMEG_3791 MSMEG_4571 MSMEG_4625 MSMEG_4951 MSMEG_5431 MSMEG_6894 MSMEG_6895 MSMEG_6897
6.66e-13	50	82	2.90633	Mixed, incl. tetrapyrrole biosynthetic process, and abc transporter periplasmic binding domain		MSMEG_0009 MSMEG_0011 MSMEG_0012 MSMEG_0020 MSMEG_0952 MSMEG_0953 MSMEG_0954 MSMEG_0956 MSMEG_0958 MSMEG_0959 MSMEG_0960 MSMEG_0970 MSMEG_0971 MSMEG_0973 MSMEG_0974 MSMEG_1038 MSMEG_1039 MSMEG_1042 MSMEG_2588 MSMEG_2607 MSMEG_2608 MSMEG_2609 MSMEG_2610 MSMEG_2615 MSMEG_2616 MSMEG_2617 MSMEG_2618 MSMEG_3152 MSMEG_3872 MSMEG_3873 MSMEG_3875 MSMEG_3877 MSMEG_4274 MSMEG_4275 MSMEG_4310 MSMEG_4472 MSM…
8.83e-12	246	774	1.5149	Organonitrogen compound biosynthetic process	http://amigo.geneontology.org/amigo/term/GO:1901566	MSMEG_0014 MSMEG_0031 MSMEG_0233 MSMEG_0239 MSMEG_0313 MSMEG_0545 MSMEG_0678 MSMEG_0759 MSMEG_0769 MSMEG_0783 MSMEG_0784 MSMEG_0789 MSMEG_0825 MSMEG_0826 MSMEG_0832 MSMEG_0836 MSMEG_0928 MSMEG_0929 MSMEG_0943 MSMEG_0949 MSMEG_0952 MSMEG_0953 MSMEG_0954 MSMEG_0956 MSMEG_1041 MSMEG_1316 MSMEG_1339 MSMEG_1346 MSMEG_1347 MSMEG_1364 MSMEG_1365 MSMEG_1398 MSMEG_1399 MSMEG_1401 MSMEG_1435 MSMEG_1436 MSM…
3.37e-10	199	612	1.54985	Transferase		MSMEG_0001 MSMEG_0014 MSMEG_0028 MSMEG_0030 MSMEG_0095 MSMEG_0246 MSMEG_0311 MSMEG_0359 MSMEG_0388 MSMEG_0389 MSMEG_0390 MSMEG_0614 MSMEG_0627 MSMEG_0629 MSMEG_0688 MSMEG_0739 MSMEG_0769 MSMEG_0782 MSMEG_0783 MSMEG_0784 MSMEG_0789 MSMEG_0825 MSMEG_0830 MSMEG_0860 MSMEG_0913 MSMEG_0936 MSMEG_0953 MSMEG_1014 MSMEG_1049 MSMEG_1050 MSMEG_1055 MSMEG_1115 MSMEG_1133 MSMEG_1207 MSMEG_1208 MSMEG_1350 MSM…
1.09e-09	374	1338	1.33231	Organic substance biosynthetic process	http://amigo.geneontology.org/amigo/term/GO:1901576	MSMEG_6947 MSMEG_0001 MSMEG_0005 MSMEG_0006 MSMEG_0014 MSMEG_0031 MSMEG_0220 MSMEG_0233 MSMEG_0239 MSMEG_0311 MSMEG_0313 MSMEG_0359 MSMEG_0390 MSMEG_0408 MSMEG_0409 MSMEG_0545 MSMEG_0627 MSMEG_0634 MSMEG_0678 MSMEG_0758 MSMEG_0759 MSMEG_0769 MSMEG_0783 MSMEG_0784 MSMEG_0789 MSMEG_0825 MSMEG_0826 MSMEG_0830 MSMEG_0832 MSMEG_0836 MSMEG_0860 MSMEG_0912 MSMEG_0913 MSMEG_0922 MSMEG_0928 MSMEG_0929 MSM…
1.71e-09	387	1398	1.31945	Biosynthetic process	http://amigo.geneontology.org/amigo/term/GO:0009058	MSMEG_6947 MSMEG_0001 MSMEG_0005 MSMEG_0006 MSMEG_0014 MSMEG_0031 MSMEG_0129 MSMEG_0220 MSMEG_0233 MSMEG_0239 MSMEG_0311 MSMEG_0313 MSMEG_0359 MSMEG_0388 MSMEG_0390 MSMEG_0408 MSMEG_0409 MSMEG_0426 MSMEG_0545 MSMEG_0627 MSMEG_0634 MSMEG_0678 MSMEG_0688 MSMEG_0758 MSMEG_0759 MSMEG_0769 MSMEG_0782 MSMEG_0783 MSMEG_0784 MSMEG_0789 MSMEG_0825 MSMEG_0826 MSMEG_0830 MSMEG_0832 MSMEG_0836 MSMEG_0860 MSM…
2.14e-09	361	1289	1.33488	Cellular biosynthetic process	http://amigo.geneontology.org/amigo/term/GO:0044249	MSMEG_6947 MSMEG_0001 MSMEG_0005 MSMEG_0006 MSMEG_0014 MSMEG_0031 MSMEG_0129 MSMEG_0220 MSMEG_0233 MSMEG_0239 MSMEG_0311 MSMEG_0313 MSMEG_0359 MSMEG_0388 MSMEG_0408 MSMEG_0409 MSMEG_0545 MSMEG_0627 MSMEG_0634 MSMEG_0678 MSMEG_0758 MSMEG_0759 MSMEG_0769 MSMEG_0783 MSMEG_0784 MSMEG_0789 MSMEG_0825 MSMEG_0826 MSMEG_0830 MSMEG_0832 MSMEG_0860 MSMEG_0912 MSMEG_0922 MSMEG_0928 MSMEG_0929 MSMEG_0943 MSM…
2.77e-09	56	114	2.34138	Mixed, incl. tetrapyrrole biosynthetic process, and transition metal ion transport		MSMEG_0009 MSMEG_0011 MSMEG_0012 MSMEG_0020 MSMEG_0952 MSMEG_0953 MSMEG_0954 MSMEG_0956 MSMEG_0958 MSMEG_0959 MSMEG_0960 MSMEG_0970 MSMEG_0971 MSMEG_0973 MSMEG_0974 MSMEG_1038 MSMEG_1039 MSMEG_1042 MSMEG_1642 MSMEG_1643 MSMEG_2588 MSMEG_2607 MSMEG_2608 MSMEG_2609 MSMEG_2610 MSMEG_2615 MSMEG_2616 MSMEG_2617 MSMEG_2618 MSMEG_3152 MSMEG_3872 MSMEG_3873 MSMEG_3875 MSMEG_3877 MSMEG_4274 MSMEG_4275 MSM…
3.41e-09	197	619	1.51693	Cellular nitrogen compound biosynthetic process	http://amigo.geneontology.org/amigo/term/GO:0044271	MSMEG_0001 MSMEG_0014 MSMEG_0545 MSMEG_0678 MSMEG_0759 MSMEG_0783 MSMEG_0784 MSMEG_0789 MSMEG_0825 MSMEG_0826 MSMEG_0832 MSMEG_0922 MSMEG_0952 MSMEG_0953 MSMEG_0954 MSMEG_0956 MSMEG_1014 MSMEG_1316 MSMEG_1339 MSMEG_1346 MSMEG_1347 MSMEG_1364 MSMEG_1365 MSMEG_1367 MSMEG_1368 MSMEG_1398 MSMEG_1399 MSMEG_1401 MSMEG_1435 MSMEG_1436 MSMEG_1437 MSMEG_1438 MSMEG_1439 MSMEG_1440 MSMEG_1441 MSMEG_1442 MSM…
2.38e-08	115	319	1.71829	Cellular amide metabolic process	http://amigo.geneontology.org/amigo/term/GO:0043603	MSMEG_0014 MSMEG_0580 MSMEG_0783 MSMEG_0784 MSMEG_0832 MSMEG_1316 MSMEG_1339 MSMEG_1346 MSMEG_1347 MSMEG_1364 MSMEG_1365 MSMEG_1398 MSMEG_1399 MSMEG_1401 MSMEG_1435 MSMEG_1436 MSMEG_1437 MSMEG_1438 MSMEG_1439 MSMEG_1440 MSMEG_1441 MSMEG_1442 MSMEG_1443 MSMEG_1444 MSMEG_1445 MSMEG_1465 MSMEG_1466 MSMEG_1467 MSMEG_1468 MSMEG_1469 MSMEG_1519 MSMEG_1520 MSMEG_1521 MSMEG_1522 MSMEG_1523 MSMEG_1525 MSM…
3.42e-08	83	208	1.90197	RNA binding	http://amigo.geneontology.org/amigo/term/GO:0003723	MSMEG_0739 MSMEG_1247 MSMEG_1316 MSMEG_1346 MSMEG_1347 MSMEG_1364 MSMEG_1396 MSMEG_1398 MSMEG_1399 MSMEG_1401 MSMEG_1435 MSMEG_1436 MSMEG_1437 MSMEG_1438 MSMEG_1439 MSMEG_1440 MSMEG_1441 MSMEG_1442 MSMEG_1443 MSMEG_1445 MSMEG_1465 MSMEG_1466 MSMEG_1467 MSMEG_1468 MSMEG_1469 MSMEG_1519 MSMEG_1521 MSMEG_1522 MSMEG_1523 MSMEG_1527 MSMEG_1540 MSMEG_1636 MSMEG_1646 MSMEG_1889 MSMEG_2086 MSMEG_2091 MSM…
4.4e-08	33	55	2.85983	Tetrapyrrole biosynthetic process, and cobalt transport protein		MSMEG_0952 MSMEG_0953 MSMEG_0954 MSMEG_0956 MSMEG_0970 MSMEG_0971 MSMEG_0973 MSMEG_0974 MSMEG_2588 MSMEG_2607 MSMEG_2608 MSMEG_2609 MSMEG_2610 MSMEG_2615 MSMEG_2616 MSMEG_2617 MSMEG_2618 MSMEG_3152 MSMEG_3872 MSMEG_3873 MSMEG_3875 MSMEG_3877 MSMEG_4274 MSMEG_4275 MSMEG_4310 MSMEG_4472 MSMEG_4529 MSMEG_5548 MSMEG_6088 MSMEG_6089 MSMEG_6724 MSMEG_6725 MSMEG_6726
4.4e-08	83	209	1.89287	Peptide metabolic process	http://amigo.geneontology.org/amigo/term/GO:0006518	MSMEG_0014 MSMEG_0832 MSMEG_1316 MSMEG_1339 MSMEG_1346 MSMEG_1347 MSMEG_1364 MSMEG_1365 MSMEG_1398 MSMEG_1399 MSMEG_1401 MSMEG_1435 MSMEG_1436 MSMEG_1437 MSMEG_1438 MSMEG_1439 MSMEG_1440 MSMEG_1441 MSMEG_1442 MSMEG_1443 MSMEG_1444 MSMEG_1445 MSMEG_1465 MSMEG_1466 MSMEG_1467 MSMEG_1468 MSMEG_1469 MSMEG_1519 MSMEG_1520 MSMEG_1521 MSMEG_1522 MSMEG_1523 MSMEG_1525 MSMEG_1556 MSMEG_1557 MSMEG_1615 MSM…
4.44e-08	36	63	2.72365	Mixed, incl. tetrapyrrole biosynthetic process, and cobalt transport protein		MSMEG_0952 MSMEG_0953 MSMEG_0954 MSMEG_0956 MSMEG_0958 MSMEG_0959 MSMEG_0960 MSMEG_0970 MSMEG_0971 MSMEG_0973 MSMEG_0974 MSMEG_2588 MSMEG_2607 MSMEG_2608 MSMEG_2609 MSMEG_2610 MSMEG_2615 MSMEG_2616 MSMEG_2617 MSMEG_2618 MSMEG_3152 MSMEG_3872 MSMEG_3873 MSMEG_3875 MSMEG_3877 MSMEG_4274 MSMEG_4275 MSMEG_4310 MSMEG_4472 MSMEG_4529 MSMEG_5548 MSMEG_6088 MSMEG_6089 MSMEG_6724 MSMEG_6725 MSMEG_6726
7.68e-08	82	208	1.87905	Peptide biosynthetic process	http://amigo.geneontology.org/amigo/term/GO:0043043	MSMEG_0014 MSMEG_0832 MSMEG_1316 MSMEG_1339 MSMEG_1346 MSMEG_1347 MSMEG_1364 MSMEG_1365 MSMEG_1398 MSMEG_1399 MSMEG_1401 MSMEG_1435 MSMEG_1436 MSMEG_1437 MSMEG_1438 MSMEG_1439 MSMEG_1440 MSMEG_1441 MSMEG_1442 MSMEG_1443 MSMEG_1444 MSMEG_1445 MSMEG_1465 MSMEG_1466 MSMEG_1467 MSMEG_1468 MSMEG_1469 MSMEG_1519 MSMEG_1520 MSMEG_1521 MSMEG_1522 MSMEG_1523 MSMEG_1525 MSMEG_1556 MSMEG_1557 MSMEG_1615 MSM…
1.23e-07	120	346	1.65308	Gene expression	http://amigo.geneontology.org/amigo/term/GO:0010467	MSMEG_0014 MSMEG_0739 MSMEG_0832 MSMEG_1316 MSMEG_1339 MSMEG_1346 MSMEG_1347 MSMEG_1364 MSMEG_1365 MSMEG_1367 MSMEG_1368 MSMEG_1398 MSMEG_1399 MSMEG_1401 MSMEG_1435 MSMEG_1436 MSMEG_1437 MSMEG_1438 MSMEG_1439 MSMEG_1440 MSMEG_1441 MSMEG_1442 MSMEG_1443 MSMEG_1444 MSMEG_1445 MSMEG_1465 MSMEG_1466 MSMEG_1467 MSMEG_1468 MSMEG_1469 MSMEG_1485 MSMEG_1519 MSMEG_1520 MSMEG_1521 MSMEG_1522 MSMEG_1523 MSM…
1.53e-07	78	197	1.8872	Mixed, incl. external encapsulating structure organization, and transmembrane helix		MSMEG_0025 MSMEG_0315 MSMEG_0317 MSMEG_0359 MSMEG_0758 MSMEG_0830 MSMEG_0923 MSMEG_0927 MSMEG_0929 MSMEG_0941 MSMEG_0942 MSMEG_1055 MSMEG_1567 MSMEG_1570 MSMEG_1684 MSMEG_1823 MSMEG_1824 MSMEG_1826 MSMEG_1920 MSMEG_1921 MSMEG_1923 MSMEG_1929 MSMEG_2349 MSMEG_2350 MSMEG_2363 MSMEG_2697 MSMEG_2699 MSMEG_2729 MSMEG_2761 MSMEG_3148 MSMEG_3149 MSMEG_3817 MSMEG_3857 MSMEG_3879 MSMEG_4239 MSMEG_4241 MSM…
2.18e-07	66	158	1.99102	Mostly uncharacterized, incl. external encapsulating structure organization, and transferase activity, transferring hexosyl groups		MSMEG_0025 MSMEG_0315 MSMEG_0317 MSMEG_0359 MSMEG_0758 MSMEG_0830 MSMEG_0923 MSMEG_0927 MSMEG_0929 MSMEG_0941 MSMEG_0942 MSMEG_1055 MSMEG_1567 MSMEG_1684 MSMEG_1823 MSMEG_1824 MSMEG_1826 MSMEG_1920 MSMEG_1921 MSMEG_1923 MSMEG_1929 MSMEG_2349 MSMEG_2350 MSMEG_2363 MSMEG_2729 MSMEG_2761 MSMEG_3148 MSMEG_3149 MSMEG_3817 MSMEG_3879 MSMEG_4239 MSMEG_4241 MSMEG_4245 MSMEG_4252 MSMEG_4752 MSMEG_4893 MSM…
2.18e-07	95	258	1.75506	Amide biosynthetic process	http://amigo.geneontology.org/amigo/term/GO:0043604	MSMEG_0014 MSMEG_0783 MSMEG_0784 MSMEG_0832 MSMEG_1316 MSMEG_1339 MSMEG_1346 MSMEG_1347 MSMEG_1364 MSMEG_1365 MSMEG_1398 MSMEG_1399 MSMEG_1401 MSMEG_1435 MSMEG_1436 MSMEG_1437 MSMEG_1438 MSMEG_1439 MSMEG_1440 MSMEG_1441 MSMEG_1442 MSMEG_1443 MSMEG_1444 MSMEG_1445 MSMEG_1465 MSMEG_1466 MSMEG_1467 MSMEG_1468 MSMEG_1469 MSMEG_1519 MSMEG_1520 MSMEG_1521 MSMEG_1522 MSMEG_1523 MSMEG_1525 MSMEG_1556 MSM…
4.91e-07	132	399	1.57685	Nucleotide-binding		MSMEG_6947 MSMEG_0005 MSMEG_0006 MSMEG_0017 MSMEG_0028 MSMEG_0059 MSMEG_0061 MSMEG_0246 MSMEG_0457 MSMEG_0615 MSMEG_0617 MSMEG_0640 MSMEG_0678 MSMEG_0759 MSMEG_0784 MSMEG_0825 MSMEG_0836 MSMEG_0858 MSMEG_0866 MSMEG_0903 MSMEG_0936 MSMEG_1046 MSMEG_1316 MSMEG_1401 MSMEG_1484 MSMEG_1540 MSMEG_1642 MSMEG_1819 MSMEG_1873 MSMEG_1881 MSMEG_1889 MSMEG_1934 MSMEG_2089 MSMEG_2364 MSMEG_2365 MSMEG_2395 MSM…
8.26e-07	314	1147	1.30483	Cellular nitrogen compound metabolic process	http://amigo.geneontology.org/amigo/term/GO:0034641	MSMEG_6947 MSMEG_0001 MSMEG_0005 MSMEG_0006 MSMEG_0014 MSMEG_0144 MSMEG_0202 MSMEG_0456 MSMEG_0457 MSMEG_0545 MSMEG_0580 MSMEG_0678 MSMEG_0725 MSMEG_0739 MSMEG_0759 MSMEG_0783 MSMEG_0784 MSMEG_0789 MSMEG_0825 MSMEG_0826 MSMEG_0832 MSMEG_0903 MSMEG_0922 MSMEG_0952 MSMEG_0953 MSMEG_0954 MSMEG_0956 MSMEG_1014 MSMEG_1047 MSMEG_1068 MSMEG_1249 MSMEG_1316 MSMEG_1339 MSMEG_1346 MSMEG_1347 MSMEG_1364 MSM…
9.82e-07	26	42	2.95062	Protein biosynthesis		MSMEG_0832 MSMEG_1316 MSMEG_1401 MSMEG_1519 MSMEG_2086 MSMEG_2364 MSMEG_2365 MSMEG_2520 MSMEG_2541 MSMEG_2621 MSMEG_2931 MSMEG_3003 MSMEG_3035 MSMEG_3064 MSMEG_3169 MSMEG_3777 MSMEG_3793 MSMEG_4485 MSMEG_4950 MSMEG_4959 MSMEG_5441 MSMEG_5671 MSMEG_6074 MSMEG_6094 MSMEG_6413 MSMEG_6917
1.13e-06	60	144	1.98599	Mixed, incl. external encapsulating structure organization, and transferase activity, transferring hexosyl groups		MSMEG_0025 MSMEG_0315 MSMEG_0317 MSMEG_0359 MSMEG_0758 MSMEG_0830 MSMEG_0929 MSMEG_0941 MSMEG_0942 MSMEG_1055 MSMEG_1567 MSMEG_1684 MSMEG_1823 MSMEG_1824 MSMEG_1826 MSMEG_1920 MSMEG_1921 MSMEG_1923 MSMEG_1929 MSMEG_2349 MSMEG_2350 MSMEG_2363 MSMEG_2729 MSMEG_2761 MSMEG_3148 MSMEG_3149 MSMEG_3879 MSMEG_4239 MSMEG_4241 MSMEG_4245 MSMEG_4252 MSMEG_4752 MSMEG_4893 MSMEG_4896 MSMEG_4933 MSMEG_5130 MSM…
1.74e-06	345	1289	1.27572	Organonitrogen compound metabolic process	http://amigo.geneontology.org/amigo/term/GO:1901564	MSMEG_0014 MSMEG_0024 MSMEG_0028 MSMEG_0030 MSMEG_0031 MSMEG_0096 MSMEG_0233 MSMEG_0239 MSMEG_0246 MSMEG_0313 MSMEG_0361 MSMEG_0545 MSMEG_0560 MSMEG_0580 MSMEG_0678 MSMEG_0759 MSMEG_0765 MSMEG_0769 MSMEG_0782 MSMEG_0783 MSMEG_0784 MSMEG_0789 MSMEG_0807 MSMEG_0824 MSMEG_0825 MSMEG_0826 MSMEG_0832 MSMEG_0836 MSMEG_0858 MSMEG_0899 MSMEG_0903 MSMEG_0928 MSMEG_0929 MSMEG_0936 MSMEG_0943 MSMEG_0949 MSM…
5.89e-06	23	37	2.96289	Tetrapyrrole biosynthetic process, and cytochrome complex assembly		MSMEG_0952 MSMEG_0953 MSMEG_0954 MSMEG_0956 MSMEG_0970 MSMEG_0971 MSMEG_0973 MSMEG_0974 MSMEG_2588 MSMEG_2615 MSMEG_2616 MSMEG_2617 MSMEG_2618 MSMEG_3152 MSMEG_3872 MSMEG_3873 MSMEG_3875 MSMEG_3877 MSMEG_4274 MSMEG_4275 MSMEG_4310 MSMEG_4529 MSMEG_5548
6.97e-06	17	23	3.52298	Cobalamin metabolic process	http://amigo.geneontology.org/amigo/term/GO:0009235	MSMEG_2588 MSMEG_2607 MSMEG_2608 MSMEG_2616 MSMEG_2617 MSMEG_2618 MSMEG_3872 MSMEG_3873 MSMEG_3875 MSMEG_3877 MSMEG_4274 MSMEG_4275 MSMEG_4305 MSMEG_4310 MSMEG_4529 MSMEG_5548 MSMEG_6277
6.97e-06	17	23	3.52298	Cobalamin biosynthetic process	http://amigo.geneontology.org/amigo/term/GO:0009236	MSMEG_2588 MSMEG_2607 MSMEG_2608 MSMEG_2616 MSMEG_2617 MSMEG_2618 MSMEG_3872 MSMEG_3873 MSMEG_3875 MSMEG_3877 MSMEG_4274 MSMEG_4275 MSMEG_4305 MSMEG_4310 MSMEG_4529 MSMEG_5548 MSMEG_6277
1.82e-05	111	341	1.55152	ATP-binding		MSMEG_6947 MSMEG_0005 MSMEG_0006 MSMEG_0017 MSMEG_0028 MSMEG_0059 MSMEG_0061 MSMEG_0246 MSMEG_0457 MSMEG_0615 MSMEG_0617 MSMEG_0640 MSMEG_0784 MSMEG_0825 MSMEG_0836 MSMEG_0858 MSMEG_0866 MSMEG_0936 MSMEG_1046 MSMEG_1484 MSMEG_1540 MSMEG_1642 MSMEG_1819 MSMEG_1873 MSMEG_1881 MSMEG_1934 MSMEG_2089 MSMEG_2364 MSMEG_2365 MSMEG_2395 MSMEG_2414 MSMEG_2502 MSMEG_2540 MSMEG_2610 MSMEG_2617 MSMEG_2621 MSM…
2.29e-05	27	50	2.57385	Tetrapyrrole metabolic process	http://amigo.geneontology.org/amigo/term/GO:0033013	MSMEG_0952 MSMEG_0953 MSMEG_0954 MSMEG_0956 MSMEG_2588 MSMEG_2607 MSMEG_2608 MSMEG_2615 MSMEG_2616 MSMEG_2617 MSMEG_2618 MSMEG_3105 MSMEG_3117 MSMEG_3152 MSMEG_3872 MSMEG_3873 MSMEG_3875 MSMEG_3877 MSMEG_4274 MSMEG_4275 MSMEG_4305 MSMEG_4310 MSMEG_4529 MSMEG_5548 MSMEG_6086 MSMEG_6277 MSMEG_6497
2.3e-05	138	448	1.46822	Macromolecule biosynthetic process	http://amigo.geneontology.org/amigo/term/GO:0009059	MSMEG_6947 MSMEG_0001 MSMEG_0005 MSMEG_0006 MSMEG_0014 MSMEG_0031 MSMEG_0233 MSMEG_0359 MSMEG_0390 MSMEG_0627 MSMEG_0832 MSMEG_0928 MSMEG_0929 MSMEG_1014 MSMEG_1316 MSMEG_1339 MSMEG_1346 MSMEG_1347 MSMEG_1364 MSMEG_1365 MSMEG_1367 MSMEG_1368 MSMEG_1398 MSMEG_1399 MSMEG_1401 MSMEG_1435 MSMEG_1436 MSMEG_1437 MSMEG_1438 MSMEG_1439 MSMEG_1440 MSMEG_1441 MSMEG_1442 MSMEG_1443 MSMEG_1444 MSMEG_1445 MSM…
2.48e-05	131	421	1.48313	Cellular macromolecule biosynthetic process	http://amigo.geneontology.org/amigo/term/GO:0034645	MSMEG_6947 MSMEG_0001 MSMEG_0005 MSMEG_0006 MSMEG_0014 MSMEG_0031 MSMEG_0233 MSMEG_0359 MSMEG_0627 MSMEG_0832 MSMEG_0928 MSMEG_0929 MSMEG_1014 MSMEG_1316 MSMEG_1339 MSMEG_1346 MSMEG_1347 MSMEG_1364 MSMEG_1365 MSMEG_1367 MSMEG_1368 MSMEG_1398 MSMEG_1399 MSMEG_1401 MSMEG_1435 MSMEG_1436 MSMEG_1437 MSMEG_1438 MSMEG_1439 MSMEG_1440 MSMEG_1441 MSMEG_1442 MSMEG_1443 MSMEG_1444 MSMEG_1445 MSMEG_1465 MSM…
3.35e-05	26	48	2.58179	Tetrapyrrole biosynthetic process	http://amigo.geneontology.org/amigo/term/GO:0033014	MSMEG_0952 MSMEG_0953 MSMEG_0954 MSMEG_0956 MSMEG_2588 MSMEG_2607 MSMEG_2608 MSMEG_2615 MSMEG_2616 MSMEG_2617 MSMEG_2618 MSMEG_3105 MSMEG_3117 MSMEG_3152 MSMEG_3872 MSMEG_3873 MSMEG_3875 MSMEG_3877 MSMEG_4274 MSMEG_4275 MSMEG_4305 MSMEG_4310 MSMEG_4529 MSMEG_5548 MSMEG_6277 MSMEG_6497
6.72e-05	30	61	2.34412	Mostly uncharacterized, incl. actinobacterium-type cell wall biogenesis, and cellular polysaccharide biosynthetic process		MSMEG_0025 MSMEG_0315 MSMEG_0317 MSMEG_0359 MSMEG_0758 MSMEG_1055 MSMEG_1567 MSMEG_1684 MSMEG_2349 MSMEG_2350 MSMEG_2363 MSMEG_2729 MSMEG_2761 MSMEG_4239 MSMEG_4241 MSMEG_4252 MSMEG_4752 MSMEG_4893 MSMEG_4896 MSMEG_4933 MSMEG_5130 MSMEG_5223 MSMEG_5517 MSMEG_5785 MSMEG_6143 MSMEG_6386 MSMEG_6387 MSMEG_6388 MSMEG_6389 MSMEG_6400
6.72e-05	47	115	1.948	Structural molecule activity	http://amigo.geneontology.org/amigo/term/GO:0005198	MSMEG_1339 MSMEG_1346 MSMEG_1347 MSMEG_1364 MSMEG_1365 MSMEG_1398 MSMEG_1399 MSMEG_1435 MSMEG_1436 MSMEG_1437 MSMEG_1438 MSMEG_1439 MSMEG_1440 MSMEG_1441 MSMEG_1442 MSMEG_1443 MSMEG_1444 MSMEG_1445 MSMEG_1465 MSMEG_1466 MSMEG_1467 MSMEG_1468 MSMEG_1469 MSMEG_1520 MSMEG_1521 MSMEG_1522 MSMEG_1523 MSMEG_1525 MSMEG_1556 MSMEG_1557 MSMEG_2435 MSMEG_2440 MSMEG_2519 MSMEG_2654 MSMEG_3050 MSMEG_3791 MSM…
7.82e-05	453	1817	1.18832	Nitrogen compound metabolic process	http://amigo.geneontology.org/amigo/term/GO:0006807	MSMEG_6947 MSMEG_0001 MSMEG_0005 MSMEG_0006 MSMEG_0014 MSMEG_0024 MSMEG_0028 MSMEG_0030 MSMEG_0031 MSMEG_0096 MSMEG_0144 MSMEG_0202 MSMEG_0233 MSMEG_0239 MSMEG_0246 MSMEG_0313 MSMEG_0361 MSMEG_0456 MSMEG_0457 MSMEG_0545 MSMEG_0560 MSMEG_0580 MSMEG_0678 MSMEG_0725 MSMEG_0739 MSMEG_0759 MSMEG_0765 MSMEG_0769 MSMEG_0782 MSMEG_0783 MSMEG_0784 MSMEG_0789 MSMEG_0807 MSMEG_0824 MSMEG_0825 MSMEG_0826 MSM…
7.83e-05	53	136	1.85749	Catalytic activity, acting on rna	http://amigo.geneontology.org/amigo/term/GO:0140098	MSMEG_0014 MSMEG_0739 MSMEG_0952 MSMEG_1199 MSMEG_1367 MSMEG_1368 MSMEG_1524 MSMEG_1527 MSMEG_1540 MSMEG_1636 MSMEG_1646 MSMEG_2364 MSMEG_2365 MSMEG_2413 MSMEG_2438 MSMEG_2442 MSMEG_2621 MSMEG_2649 MSMEG_2685 MSMEG_2773 MSMEG_2778 MSMEG_2931 MSMEG_3003 MSMEG_3053 MSMEG_3064 MSMEG_3169 MSMEG_3751 MSMEG_3777 MSMEG_3790 MSMEG_4245 MSMEG_4291 MSMEG_4305 MSMEG_4485 MSMEG_4502 MSMEG_4724 MSMEG_4959 MSM…
9e-05	14	19	3.51207	Mixed, incl. abc transporter periplasmic binding domain, and feccd transport family		MSMEG_0009 MSMEG_0011 MSMEG_0012 MSMEG_0020 MSMEG_1038 MSMEG_1039 MSMEG_1042 MSMEG_4557 MSMEG_4559 MSMEG_4560 MSMEG_4561 MSMEG_6062 MSMEG_6063 MSMEG_6519
0.000121751	12	15	3.81311	Mixed, incl. cdp-alcohol phosphatidyltransferase, and amine-lyase activity		MSMEG_2543 MSMEG_2692 MSMEG_2693 MSMEG_2930 MSMEG_2932 MSMEG_2933 MSMEG_2934 MSMEG_2935 MSMEG_2936 MSMEG_2937 MSMEG_2938 MSMEG_2939
0.000124436	34	75	2.16076	Mostly uncharacterized, incl. external encapsulating structure organization, and liposaccharide metabolic process		MSMEG_0025 MSMEG_0315 MSMEG_0317 MSMEG_0359 MSMEG_0758 MSMEG_0830 MSMEG_0941 MSMEG_0942 MSMEG_1055 MSMEG_1567 MSMEG_1684 MSMEG_1929 MSMEG_2349 MSMEG_2350 MSMEG_2363 MSMEG_2729 MSMEG_2761 MSMEG_4239 MSMEG_4241 MSMEG_4252 MSMEG_4752 MSMEG_4893 MSMEG_4896 MSMEG_4933 MSMEG_5130 MSMEG_5223 MSMEG_5517 MSMEG_5785 MSMEG_6143 MSMEG_6386 MSMEG_6387 MSMEG_6388 MSMEG_6389 MSMEG_6400
0.000134533	31	66	2.23876	Mixed, incl. external encapsulating structure organization, and liposaccharide metabolic process		MSMEG_0025 MSMEG_0315 MSMEG_0317 MSMEG_0359 MSMEG_0758 MSMEG_1055 MSMEG_1567 MSMEG_1684 MSMEG_1929 MSMEG_2349 MSMEG_2350 MSMEG_2363 MSMEG_2729 MSMEG_2761 MSMEG_4239 MSMEG_4241 MSMEG_4252 MSMEG_4752 MSMEG_4893 MSMEG_4896 MSMEG_4933 MSMEG_5130 MSMEG_5223 MSMEG_5517 MSMEG_5785 MSMEG_6143 MSMEG_6386 MSMEG_6387 MSMEG_6388 MSMEG_6389 MSMEG_6400
0.000134533	56	149	1.79139	Non-membrane-bounded organelle	http://amigo.geneontology.org/amigo/term/GO:0043228	MSMEG_0005 MSMEG_0006 MSMEG_0456 MSMEG_0457 MSMEG_1339 MSMEG_1346 MSMEG_1347 MSMEG_1364 MSMEG_1365 MSMEG_1398 MSMEG_1399 MSMEG_1435 MSMEG_1436 MSMEG_1437 MSMEG_1438 MSMEG_1439 MSMEG_1440 MSMEG_1441 MSMEG_1442 MSMEG_1443 MSMEG_1444 MSMEG_1445 MSMEG_1465 MSMEG_1466 MSMEG_1467 MSMEG_1468 MSMEG_1469 MSMEG_1520 MSMEG_1521 MSMEG_1522 MSMEG_1523 MSMEG_1525 MSMEG_1556 MSMEG_1557 MSMEG_2435 MSMEG_2437 MSM…
0.000134533	56	149	1.79139	Intracellular non-membrane-bounded organelle	http://amigo.geneontology.org/amigo/term/GO:0043232	MSMEG_0005 MSMEG_0006 MSMEG_0456 MSMEG_0457 MSMEG_1339 MSMEG_1346 MSMEG_1347 MSMEG_1364 MSMEG_1365 MSMEG_1398 MSMEG_1399 MSMEG_1435 MSMEG_1436 MSMEG_1437 MSMEG_1438 MSMEG_1439 MSMEG_1440 MSMEG_1441 MSMEG_1442 MSMEG_1443 MSMEG_1444 MSMEG_1445 MSMEG_1465 MSMEG_1466 MSMEG_1467 MSMEG_1468 MSMEG_1469 MSMEG_1520 MSMEG_1521 MSMEG_1522 MSMEG_1523 MSMEG_1525 MSMEG_1556 MSMEG_1557 MSMEG_2435 MSMEG_2437 MSM…
0.000149979	36	82	2.09256	rRNA binding	http://amigo.geneontology.org/amigo/term/GO:0019843	MSMEG_1346 MSMEG_1347 MSMEG_1364 MSMEG_1398 MSMEG_1399 MSMEG_1436 MSMEG_1437 MSMEG_1438 MSMEG_1439 MSMEG_1440 MSMEG_1441 MSMEG_1442 MSMEG_1443 MSMEG_1445 MSMEG_1465 MSMEG_1466 MSMEG_1467 MSMEG_1468 MSMEG_1469 MSMEG_1519 MSMEG_1521 MSMEG_1522 MSMEG_1523 MSMEG_1889 MSMEG_2654 MSMEG_3050 MSMEG_3791 MSMEG_4571 MSMEG_4625 MSMEG_4700 MSMEG_4951 MSMEG_5132 MSMEG_5431 MSMEG_6894 MSMEG_6895 MSMEG_6897
0.000195781	25	49	2.43183	RNA modification	http://amigo.geneontology.org/amigo/term/GO:0009451	MSMEG_0014 MSMEG_0739 MSMEG_1527 MSMEG_1577 MSMEG_1580 MSMEG_1636 MSMEG_1646 MSMEG_2413 MSMEG_2438 MSMEG_2649 MSMEG_2729 MSMEG_2773 MSMEG_3064 MSMEG_3175 MSMEG_3740 MSMEG_3751 MSMEG_3790 MSMEG_4502 MSMEG_4687 MSMEG_5445 MSMEG_5687 MSMEG_6073 MSMEG_6111 MSMEG_6327 MSMEG_6940
0.000212553	54	144	1.78739	Magnesium		MSMEG_0005 MSMEG_0028 MSMEG_0759 MSMEG_0784 MSMEG_0789 MSMEG_0911 MSMEG_1014 MSMEG_1368 MSMEG_1446 MSMEG_1825 MSMEG_1928 MSMEG_2372 MSMEG_2374 MSMEG_2379 MSMEG_2395 MSMEG_2414 MSMEG_2617 MSMEG_2656 MSMEG_2765 MSMEG_2933 MSMEG_2935 MSMEG_2943 MSMEG_3031 MSMEG_3055 MSMEG_3777 MSMEG_4180 MSMEG_4232 MSMEG_4245 MSMEG_4258 MSMEG_4293 MSMEG_4298 MSMEG_4490 MSMEG_4535 MSMEG_4623 MSMEG_4627 MSMEG_4756 MSM…
0.000239051	8	8	4.76638	Virulence factor Mce protein, and Permease MlaE		MSMEG_5895 MSMEG_5896 MSMEG_5897 MSMEG_5898 MSMEG_5899 MSMEG_5900 MSMEG_5901 MSMEG_5902
0.000269702	40	97	1.96552	Methyltransferase		MSMEG_0095 MSMEG_0388 MSMEG_0614 MSMEG_0629 MSMEG_0739 MSMEG_0913 MSMEG_1049 MSMEG_1050 MSMEG_1115 MSMEG_1350 MSMEG_1351 MSMEG_1479 MSMEG_1481 MSMEG_1482 MSMEG_1636 MSMEG_1646 MSMEG_1650 MSMEG_1888 MSMEG_1893 MSMEG_2350 MSMEG_2413 MSMEG_2438 MSMEG_2618 MSMEG_2683 MSMEG_2773 MSMEG_3538 MSMEG_3790 MSMEG_3873 MSMEG_3877 MSMEG_4298 MSMEG_4502 MSMEG_4949 MSMEG_5445 MSMEG_5548 MSMEG_5553 MSMEG_5687 MSM…
0.000348455	33	75	2.09721	Amino-acid biosynthesis		MSMEG_0769 MSMEG_0943 MSMEG_1651 MSMEG_1753 MSMEG_2372 MSMEG_2373 MSMEG_2374 MSMEG_2379 MSMEG_2684 MSMEG_2799 MSMEG_3030 MSMEG_3031 MSMEG_3033 MSMEG_3219 MSMEG_3220 MSMEG_3221 MSMEG_3770 MSMEG_3772 MSMEG_3773 MSMEG_3774 MSMEG_4180 MSMEG_4181 MSMEG_4258 MSMEG_4621 MSMEG_4956 MSMEG_4957 MSMEG_4958 MSMEG_5104 MSMEG_5536 MSMEG_6256 MSMEG_6257 MSMEG_6271 MSMEG_6638
0.000384664	31	69	2.14142	Mixed, incl. aminoglycan metabolic process, and carboxypeptidase		MSMEG_0231 MSMEG_0233 MSMEG_0928 MSMEG_1575 MSMEG_2395 MSMEG_2433 MSMEG_3026 MSMEG_3027 MSMEG_3499 MSMEG_3500 MSMEG_4216 MSMEG_4218 MSMEG_4220 MSMEG_4221 MSMEG_4227 MSMEG_4230 MSMEG_4232 MSMEG_4253 MSMEG_4255 MSMEG_4256 MSMEG_4257 MSMEG_4643 MSMEG_5439 MSMEG_5445 MSMEG_5700 MSMEG_6111 MSMEG_6113 MSMEG_6276 MSMEG_6277 MSMEG_6899 MSMEG_6900
0.000384664	31	69	2.14142	Nucleoside monophosphate metabolic process, and pyrimidine metabolism		MSMEG_0678 MSMEG_0759 MSMEG_1484 MSMEG_1701 MSMEG_1819 MSMEG_1820 MSMEG_1873 MSMEG_2540 MSMEG_2671 MSMEG_2683 MSMEG_2765 MSMEG_2964 MSMEG_3042 MSMEG_3043 MSMEG_3044 MSMEG_3051 MSMEG_4198 MSMEG_4214 MSMEG_4270 MSMEG_4483 MSMEG_4627 MSMEG_4687 MSMEG_5274 MSMEG_5515 MSMEG_5516 MSMEG_5798 MSMEG_5831 MSMEG_5832 MSMEG_5841 MSMEG_5847 MSMEG_5852
0.000418395	10	12	3.97198	Capsule organization, and bacterial proteasome activator		MSMEG_3879 MSMEG_6365 MSMEG_6366 MSMEG_6367 MSMEG_6369 MSMEG_6382 MSMEG_6385 MSMEG_6401 MSMEG_6403 MSMEG_6404
0.000418395	10	12	3.97198	De novo imp biosynthetic process		MSMEG_0759 MSMEG_1819 MSMEG_1820 MSMEG_5515 MSMEG_5516 MSMEG_5798 MSMEG_5831 MSMEG_5841 MSMEG_5847 MSMEG_5852
0.000435218	63	180	1.66823	Mixed, incl. tetrapyrrole biosynthetic process, and prosthetic group metabolic process		MSMEG_0009 MSMEG_0011 MSMEG_0012 MSMEG_0020 MSMEG_0952 MSMEG_0953 MSMEG_0954 MSMEG_0956 MSMEG_0958 MSMEG_0959 MSMEG_0960 MSMEG_0970 MSMEG_0971 MSMEG_0973 MSMEG_0974 MSMEG_1038 MSMEG_1039 MSMEG_1042 MSMEG_1453 MSMEG_1615 MSMEG_1642 MSMEG_1643 MSMEG_2015 MSMEG_2016 MSMEG_2017 MSMEG_2588 MSMEG_2607 MSMEG_2608 MSMEG_2609 MSMEG_2610 MSMEG_2615 MSMEG_2616 MSMEG_2617 MSMEG_2618 MSMEG_3152 MSMEG_3872 MSM…
0.000435218	25	51	2.33646	Nucleoside monophosphate biosynthetic process, and pyrimidine metabolism		MSMEG_0759 MSMEG_1701 MSMEG_1819 MSMEG_1820 MSMEG_2540 MSMEG_2671 MSMEG_2683 MSMEG_2964 MSMEG_3042 MSMEG_3043 MSMEG_3044 MSMEG_4198 MSMEG_4214 MSMEG_4270 MSMEG_4483 MSMEG_4687 MSMEG_5274 MSMEG_5515 MSMEG_5516 MSMEG_5798 MSMEG_5831 MSMEG_5832 MSMEG_5841 MSMEG_5847 MSMEG_5852
0.000461654	16	26	2.93316	Cell wall biogenesis/degradation		MSMEG_0031 MSMEG_0928 MSMEG_2395 MSMEG_3027 MSMEG_4194 MSMEG_4227 MSMEG_4230 MSMEG_4232 MSMEG_4947 MSMEG_5426 MSMEG_6113 MSMEG_6367 MSMEG_6382 MSMEG_6385 MSMEG_6401 MSMEG_6403
0.000478611	117	389	1.43359	Aromatic compound biosynthetic process	http://amigo.geneontology.org/amigo/term/GO:0019438	MSMEG_0001 MSMEG_0545 MSMEG_0678 MSMEG_0759 MSMEG_0783 MSMEG_0784 MSMEG_0789 MSMEG_0825 MSMEG_0826 MSMEG_0922 MSMEG_0952 MSMEG_0953 MSMEG_0954 MSMEG_0956 MSMEG_1014 MSMEG_1367 MSMEG_1368 MSMEG_1484 MSMEG_1524 MSMEG_1819 MSMEG_1820 MSMEG_1825 MSMEG_1873 MSMEG_2363 MSMEG_2414 MSMEG_2540 MSMEG_2588 MSMEG_2607 MSMEG_2608 MSMEG_2614 MSMEG_2615 MSMEG_2616 MSMEG_2617 MSMEG_2618 MSMEG_2648 MSMEG_2671 MSM…
0.000575689	21	40	2.50235	Mixed, incl. vitamin biosynthetic process, and coenzyme a metabolic process		MSMEG_2414 MSMEG_2698 MSMEG_3054 MSMEG_3067 MSMEG_3071 MSMEG_3073 MSMEG_3189 MSMEG_3193 MSMEG_3195 MSMEG_3196 MSMEG_4298 MSMEG_6096 MSMEG_6097 MSMEG_6098 MSMEG_6100 MSMEG_6101 MSMEG_6102 MSMEG_6103 MSMEG_6104 MSMEG_6109 MSMEG_6598
0.000575689	17	29	2.79409	Mixed, incl. pantothenate metabolic process, and folic acid-containing compound biosynthetic process		MSMEG_2414 MSMEG_2698 MSMEG_3054 MSMEG_3067 MSMEG_3071 MSMEG_3073 MSMEG_4298 MSMEG_6096 MSMEG_6097 MSMEG_6098 MSMEG_6100 MSMEG_6101 MSMEG_6102 MSMEG_6103 MSMEG_6104 MSMEG_6109 MSMEG_6598
0.000575689	17	29	2.79409	Mixed, incl. glycerophospholipid metabolism, and amine-lyase activity		MSMEG_0860 MSMEG_0867 MSMEG_2543 MSMEG_2692 MSMEG_2693 MSMEG_2930 MSMEG_2932 MSMEG_2933 MSMEG_2934 MSMEG_2935 MSMEG_2936 MSMEG_2937 MSMEG_2938 MSMEG_2939 MSMEG_4697 MSMEG_4698 MSMEG_4700
0.000579478	33	77	2.04274	Vitamin biosynthetic process	http://amigo.geneontology.org/amigo/term/GO:0009110	MSMEG_0789 MSMEG_0825 MSMEG_0826 MSMEG_2588 MSMEG_2607 MSMEG_2608 MSMEG_2616 MSMEG_2617 MSMEG_2618 MSMEG_2937 MSMEG_2939 MSMEG_3067 MSMEG_3071 MSMEG_3073 MSMEG_3189 MSMEG_3872 MSMEG_3873 MSMEG_3875 MSMEG_3877 MSMEG_4274 MSMEG_4275 MSMEG_4298 MSMEG_4305 MSMEG_4310 MSMEG_4529 MSMEG_5548 MSMEG_5675 MSMEG_6097 MSMEG_6101 MSMEG_6102 MSMEG_6103 MSMEG_6277 MSMEG_6598
0.000579478	33	77	2.04274	Water-soluble vitamin biosynthetic process	http://amigo.geneontology.org/amigo/term/GO:0042364	MSMEG_0789 MSMEG_0825 MSMEG_0826 MSMEG_2588 MSMEG_2607 MSMEG_2608 MSMEG_2616 MSMEG_2617 MSMEG_2618 MSMEG_2937 MSMEG_2939 MSMEG_3067 MSMEG_3071 MSMEG_3073 MSMEG_3189 MSMEG_3872 MSMEG_3873 MSMEG_3875 MSMEG_3877 MSMEG_4274 MSMEG_4275 MSMEG_4298 MSMEG_4305 MSMEG_4310 MSMEG_4529 MSMEG_5548 MSMEG_5675 MSMEG_6097 MSMEG_6101 MSMEG_6102 MSMEG_6103 MSMEG_6277 MSMEG_6598
0.000579478	115	383	1.43116	Cellular protein metabolic process	http://amigo.geneontology.org/amigo/term/GO:0044267	MSMEG_0014 MSMEG_0024 MSMEG_0028 MSMEG_0030 MSMEG_0096 MSMEG_0246 MSMEG_0765 MSMEG_0824 MSMEG_0832 MSMEG_0858 MSMEG_0936 MSMEG_0953 MSMEG_1041 MSMEG_1265 MSMEG_1316 MSMEG_1339 MSMEG_1346 MSMEG_1347 MSMEG_1364 MSMEG_1365 MSMEG_1398 MSMEG_1399 MSMEG_1401 MSMEG_1435 MSMEG_1436 MSMEG_1437 MSMEG_1438 MSMEG_1439 MSMEG_1440 MSMEG_1441 MSMEG_1442 MSMEG_1443 MSMEG_1444 MSMEG_1445 MSMEG_1465 MSMEG_1466 MSM…
0.000579478	22	43	2.43861	S-adenosyl-L-methionine		MSMEG_0095 MSMEG_0614 MSMEG_0826 MSMEG_1115 MSMEG_1479 MSMEG_1481 MSMEG_1482 MSMEG_1636 MSMEG_1646 MSMEG_1888 MSMEG_2350 MSMEG_2438 MSMEG_2618 MSMEG_2729 MSMEG_2773 MSMEG_3873 MSMEG_3877 MSMEG_4502 MSMEG_4949 MSMEG_5445 MSMEG_6073 MSMEG_6940
0.000779706	33	78	2.01655	Amino-acid biosynthesis, and Phenylalanine, tyrosine and tryptophan biosynthesis		MSMEG_0560 MSMEG_0688 MSMEG_1041 MSMEG_2372 MSMEG_2373 MSMEG_2374 MSMEG_2379 MSMEG_2684 MSMEG_2685 MSMEG_2691 MSMEG_2799 MSMEG_3028 MSMEG_3030 MSMEG_3031 MSMEG_3033 MSMEG_3219 MSMEG_3220 MSMEG_3221 MSMEG_3770 MSMEG_3772 MSMEG_3773 MSMEG_3774 MSMEG_4258 MSMEG_4956 MSMEG_4957 MSMEG_4958 MSMEG_5104 MSMEG_5121 MSMEG_5536 MSMEG_6256 MSMEG_6257 MSMEG_6271 MSMEG_6351
0.000849363	21	41	2.44132	HotDog domain superfamily	https://www.ebi.ac.uk/interpro/entry/InterPro/IPR029069	MSMEG_0580 MSMEG_0942 MSMEG_0948 MSMEG_1340 MSMEG_1341 MSMEG_1342 MSMEG_1433 MSMEG_2201 MSMEG_2470 MSMEG_2586 MSMEG_2938 MSMEG_2997 MSMEG_3228 MSMEG_3261 MSMEG_3628 MSMEG_3812 MSMEG_4698 MSMEG_4757 MSMEG_6208 MSMEG_6464 MSMEG_6754
0.000866605	7	7	4.76638	tRNA (guanine-N1-)-methyltransferase, N-terminal	https://www.ebi.ac.uk/interpro/entry/InterPro/IPR029026	MSMEG_0739 MSMEG_1636 MSMEG_2438 MSMEG_3790 MSMEG_4502 MSMEG_5687 MSMEG_6073
0.000866605	7	7	4.76638	Alpha/beta knot methyltransferases	https://www.ebi.ac.uk/interpro/entry/InterPro/IPR029028	MSMEG_0739 MSMEG_1636 MSMEG_2438 MSMEG_3790 MSMEG_4502 MSMEG_5687 MSMEG_6073
0.00094547	11	15	3.49535	Antibiotic resistance		MSMEG_0001 MSMEG_0006 MSMEG_1367 MSMEG_1641 MSMEG_2658 MSMEG_3151 MSMEG_3858 MSMEG_4194 MSMEG_4914 MSMEG_6225 MSMEG_6382
0.00115077	51	142	1.71187	Cellular amino acid biosynthetic process, and sulfur metabolism		MSMEG_0239 MSMEG_0560 MSMEG_0688 MSMEG_0769 MSMEG_1041 MSMEG_1651 MSMEG_1652 MSMEG_1843 MSMEG_2359 MSMEG_2372 MSMEG_2373 MSMEG_2374 MSMEG_2379 MSMEG_2684 MSMEG_2685 MSMEG_2691 MSMEG_2799 MSMEG_2800 MSMEG_3028 MSMEG_3030 MSMEG_3031 MSMEG_3033 MSMEG_3055 MSMEG_3214 MSMEG_3219 MSMEG_3220 MSMEG_3221 MSMEG_3770 MSMEG_3772 MSMEG_3773 MSMEG_3774 MSMEG_4180 MSMEG_4181 MSMEG_4258 MSMEG_4527 MSMEG_4528 MSM…
0.00116875	13	20	3.09815	Purine biosynthesis		MSMEG_0759 MSMEG_1819 MSMEG_1820 MSMEG_4214 MSMEG_5274 MSMEG_5515 MSMEG_5516 MSMEG_5798 MSMEG_5831 MSMEG_5832 MSMEG_5841 MSMEG_5847 MSMEG_5852
0.00116875	253	972	1.24063	Transferase activity	http://amigo.geneontology.org/amigo/term/GO:0016740	MSMEG_0001 MSMEG_0014 MSMEG_0028 MSMEG_0030 MSMEG_0095 MSMEG_0233 MSMEG_0239 MSMEG_0246 MSMEG_0262 MSMEG_0311 MSMEG_0359 MSMEG_0388 MSMEG_0389 MSMEG_0390 MSMEG_0391 MSMEG_0408 MSMEG_0409 MSMEG_0426 MSMEG_0466 MSMEG_0614 MSMEG_0627 MSMEG_0629 MSMEG_0688 MSMEG_0739 MSMEG_0758 MSMEG_0768 MSMEG_0769 MSMEG_0782 MSMEG_0783 MSMEG_0784 MSMEG_0789 MSMEG_0825 MSMEG_0830 MSMEG_0860 MSMEG_0913 MSMEG_0929 MSM…
0.00120608	20	39	2.4443	Nucleoside monophosphate biosynthetic process, and one-carbon metabolism		MSMEG_0759 MSMEG_1819 MSMEG_1820 MSMEG_2540 MSMEG_2671 MSMEG_2683 MSMEG_3042 MSMEG_3043 MSMEG_3044 MSMEG_4198 MSMEG_4214 MSMEG_5274 MSMEG_5515 MSMEG_5516 MSMEG_5798 MSMEG_5831 MSMEG_5832 MSMEG_5841 MSMEG_5847 MSMEG_5852
0.00138477	40	104	1.83322	ncRNA metabolic process	http://amigo.geneontology.org/amigo/term/GO:0034660	MSMEG_0014 MSMEG_1527 MSMEG_1577 MSMEG_1580 MSMEG_1636 MSMEG_1646 MSMEG_2413 MSMEG_2437 MSMEG_2438 MSMEG_2621 MSMEG_2649 MSMEG_2685 MSMEG_2729 MSMEG_2773 MSMEG_2778 MSMEG_2931 MSMEG_3003 MSMEG_3026 MSMEG_3064 MSMEG_3169 MSMEG_3175 MSMEG_3751 MSMEG_3777 MSMEG_4291 MSMEG_4485 MSMEG_4502 MSMEG_4687 MSMEG_4959 MSMEG_5441 MSMEG_5445 MSMEG_5671 MSMEG_6074 MSMEG_6094 MSMEG_6111 MSMEG_6327 MSMEG_6413 MSM…
0.00142042	32	77	1.98083	RNA processing	http://amigo.geneontology.org/amigo/term/GO:0006396	MSMEG_0014 MSMEG_0739 MSMEG_1527 MSMEG_1577 MSMEG_1580 MSMEG_1636 MSMEG_1646 MSMEG_2413 MSMEG_2437 MSMEG_2438 MSMEG_2649 MSMEG_2656 MSMEG_2685 MSMEG_2729 MSMEG_2773 MSMEG_2778 MSMEG_3026 MSMEG_3064 MSMEG_3175 MSMEG_3751 MSMEG_3790 MSMEG_4502 MSMEG_4687 MSMEG_5445 MSMEG_5687 MSMEG_6073 MSMEG_6111 MSMEG_6327 MSMEG_6587 MSMEG_6926 MSMEG_6940 MSMEG_6945
0.00152536	27	61	2.10971	Mixed, incl. vitamin biosynthetic process, and isoprenoid biosynthetic process		MSMEG_1133 MSMEG_2414 MSMEG_2698 MSMEG_3054 MSMEG_3067 MSMEG_3071 MSMEG_3073 MSMEG_3189 MSMEG_3193 MSMEG_3195 MSMEG_3196 MSMEG_4298 MSMEG_4489 MSMEG_4490 MSMEG_5226 MSMEG_5227 MSMEG_6075 MSMEG_6096 MSMEG_6097 MSMEG_6098 MSMEG_6100 MSMEG_6101 MSMEG_6102 MSMEG_6103 MSMEG_6104 MSMEG_6109 MSMEG_6598
0.0015271	17	31	2.61382	Mostly uncharacterized, incl. glycolipid biosynthetic process, and bacterial ph domain		MSMEG_0025 MSMEG_0758 MSMEG_1055 MSMEG_1567 MSMEG_1684 MSMEG_2349 MSMEG_2350 MSMEG_2363 MSMEG_2761 MSMEG_4239 MSMEG_4241 MSMEG_4252 MSMEG_4752 MSMEG_4933 MSMEG_5130 MSMEG_5223 MSMEG_5785
0.00179401	35	88	1.89572	Vitamin metabolic process	http://amigo.geneontology.org/amigo/term/GO:0006766	MSMEG_0789 MSMEG_0825 MSMEG_0826 MSMEG_2588 MSMEG_2607 MSMEG_2608 MSMEG_2616 MSMEG_2617 MSMEG_2618 MSMEG_2937 MSMEG_2939 MSMEG_3054 MSMEG_3067 MSMEG_3071 MSMEG_3073 MSMEG_3189 MSMEG_3872 MSMEG_3873 MSMEG_3875 MSMEG_3877 MSMEG_4274 MSMEG_4275 MSMEG_4298 MSMEG_4305 MSMEG_4310 MSMEG_4529 MSMEG_4975 MSMEG_5548 MSMEG_5675 MSMEG_6097 MSMEG_6101 MSMEG_6102 MSMEG_6103 MSMEG_6277 MSMEG_6598
0.00179401	35	88	1.89572	Water-soluble vitamin metabolic process	http://amigo.geneontology.org/amigo/term/GO:0006767	MSMEG_0789 MSMEG_0825 MSMEG_0826 MSMEG_2588 MSMEG_2607 MSMEG_2608 MSMEG_2616 MSMEG_2617 MSMEG_2618 MSMEG_2937 MSMEG_2939 MSMEG_3054 MSMEG_3067 MSMEG_3071 MSMEG_3073 MSMEG_3189 MSMEG_3872 MSMEG_3873 MSMEG_3875 MSMEG_3877 MSMEG_4274 MSMEG_4275 MSMEG_4298 MSMEG_4305 MSMEG_4310 MSMEG_4529 MSMEG_4975 MSMEG_5548 MSMEG_5675 MSMEG_6097 MSMEG_6101 MSMEG_6102 MSMEG_6103 MSMEG_6277 MSMEG_6598
0.0019201	15	26	2.74984	Mostly uncharacterized, incl. glycolipid biosynthetic process, and glycosaminoglycan binding		MSMEG_0758 MSMEG_1055 MSMEG_1567 MSMEG_1684 MSMEG_2349 MSMEG_2350 MSMEG_2363 MSMEG_2761 MSMEG_4239 MSMEG_4241 MSMEG_4252 MSMEG_4752 MSMEG_5130 MSMEG_5223 MSMEG_5785
0.0019201	65	197	1.57266	RNA metabolic process	http://amigo.geneontology.org/amigo/term/GO:0016070	MSMEG_0014 MSMEG_0739 MSMEG_1367 MSMEG_1368 MSMEG_1524 MSMEG_1527 MSMEG_1540 MSMEG_1577 MSMEG_1580 MSMEG_1636 MSMEG_1646 MSMEG_2413 MSMEG_2437 MSMEG_2438 MSMEG_2442 MSMEG_2455 MSMEG_2621 MSMEG_2649 MSMEG_2656 MSMEG_2685 MSMEG_2729 MSMEG_2773 MSMEG_2778 MSMEG_2931 MSMEG_3003 MSMEG_3026 MSMEG_3036 MSMEG_3053 MSMEG_3064 MSMEG_3169 MSMEG_3175 MSMEG_3740 MSMEG_3751 MSMEG_3777 MSMEG_3790 MSMEG_3885 MSM…
0.00213401	11	16	3.27689	Methionine biosynthetic process, and selenium-binding protein		MSMEG_0239 MSMEG_0769 MSMEG_1651 MSMEG_1652 MSMEG_1843 MSMEG_2359 MSMEG_3055 MSMEG_5265 MSMEG_6596 MSMEG_6638 MSMEG_6649
0.00260663	28	66	2.0221	Nucleoside monophosphate metabolic process	http://amigo.geneontology.org/amigo/term/GO:0009123	MSMEG_0678 MSMEG_0759 MSMEG_1484 MSMEG_1819 MSMEG_1820 MSMEG_1873 MSMEG_2540 MSMEG_2683 MSMEG_2765 MSMEG_2964 MSMEG_3043 MSMEG_3044 MSMEG_3051 MSMEG_3739 MSMEG_4198 MSMEG_4214 MSMEG_4270 MSMEG_5274 MSMEG_5427 MSMEG_5515 MSMEG_5516 MSMEG_5798 MSMEG_5831 MSMEG_5832 MSMEG_5841 MSMEG_5847 MSMEG_5852 MSMEG_6723
0.00265002	22	47	2.23107	Mostly uncharacterized, incl. mycothiol metabolic process, and arsenical pump atpase, arsa/get3		MSMEG_0930 MSMEG_0932 MSMEG_0946 MSMEG_0948 MSMEG_0949 MSMEG_1416 MSMEG_1947 MSMEG_4193 MSMEG_4194 MSMEG_4250 MSMEG_5129 MSMEG_5262 MSMEG_5264 MSMEG_5783 MSMEG_5788 MSMEG_5789 MSMEG_5790 MSMEG_5791 MSMEG_5792 MSMEG_6190 MSMEG_6193 MSMEG_6195
0.00317563	84	274	1.46123	Cellular component organization or biogenesis	http://amigo.geneontology.org/amigo/term/GO:0071840	MSMEG_0005 MSMEG_0006 MSMEG_0031 MSMEG_0233 MSMEG_0359 MSMEG_0361 MSMEG_0413 MSMEG_0456 MSMEG_0457 MSMEG_0753 MSMEG_0824 MSMEG_0928 MSMEG_0929 MSMEG_0973 MSMEG_0974 MSMEG_1242 MSMEG_1316 MSMEG_1364 MSMEG_1416 MSMEG_1540 MSMEG_1646 MSMEG_1824 MSMEG_1889 MSMEG_1929 MSMEG_2086 MSMEG_2395 MSMEG_2413 MSMEG_2437 MSMEG_2541 MSMEG_2685 MSMEG_2691 MSMEG_2773 MSMEG_2840 MSMEG_3015 MSMEG_3026 MSMEG_3027 MSM…
0.00328251	6	6	4.76638	Mixed, incl. 5s rrna binding, and ribosomal protein l34		MSMEG_1525 MSMEG_1556 MSMEG_2435 MSMEG_4571 MSMEG_5431 MSMEG_6946
0.00328251	15	27	2.64799	Purine biosynthesis, and dTMP metabolic process		MSMEG_0759 MSMEG_1819 MSMEG_1820 MSMEG_2671 MSMEG_2683 MSMEG_4214 MSMEG_5274 MSMEG_5515 MSMEG_5516 MSMEG_5798 MSMEG_5831 MSMEG_5832 MSMEG_5841 MSMEG_5847 MSMEG_5852
0.00328251	6	6	4.76638	Acyl-CoA thioesterase	https://www.ebi.ac.uk/interpro/entry/InterPro/IPR003703	MSMEG_2470 MSMEG_2938 MSMEG_2997 MSMEG_3228 MSMEG_3812 MSMEG_6208
0.00328251	6	6	4.76638	Tetrapyrrole methylase, subdomain 2	https://www.ebi.ac.uk/interpro/entry/InterPro/IPR014776	MSMEG_0954 MSMEG_2618 MSMEG_3873 MSMEG_3877 MSMEG_5445 MSMEG_5548
0.0035076	9	12	3.57479	tRNA-binding		MSMEG_1347 MSMEG_1398 MSMEG_1399 MSMEG_1443 MSMEG_1467 MSMEG_1521 MSMEG_2931 MSMEG_3777 MSMEG_4291
0.00352734	142	512	1.32193	Protein metabolic process	http://amigo.geneontology.org/amigo/term/GO:0019538	MSMEG_0014 MSMEG_0024 MSMEG_0028 MSMEG_0030 MSMEG_0096 MSMEG_0233 MSMEG_0246 MSMEG_0765 MSMEG_0807 MSMEG_0824 MSMEG_0832 MSMEG_0858 MSMEG_0899 MSMEG_0929 MSMEG_0936 MSMEG_0953 MSMEG_1041 MSMEG_1265 MSMEG_1316 MSMEG_1339 MSMEG_1346 MSMEG_1347 MSMEG_1364 MSMEG_1365 MSMEG_1398 MSMEG_1399 MSMEG_1401 MSMEG_1435 MSMEG_1436 MSMEG_1437 MSMEG_1438 MSMEG_1439 MSMEG_1440 MSMEG_1441 MSMEG_1442 MSMEG_1443 MSM…
0.00400434	34	88	1.84156	Cell wall organization	http://amigo.geneontology.org/amigo/term/GO:0071555	MSMEG_0031 MSMEG_0233 MSMEG_0361 MSMEG_0413 MSMEG_0928 MSMEG_0929 MSMEG_1824 MSMEG_2395 MSMEG_3015 MSMEG_3027 MSMEG_4194 MSMEG_4227 MSMEG_4230 MSMEG_4232 MSMEG_4733 MSMEG_4947 MSMEG_5067 MSMEG_5416 MSMEG_5426 MSMEG_6113 MSMEG_6276 MSMEG_6277 MSMEG_6367 MSMEG_6372 MSMEG_6382 MSMEG_6385 MSMEG_6386 MSMEG_6387 MSMEG_6388 MSMEG_6389 MSMEG_6400 MSMEG_6401 MSMEG_6403 MSMEG_6404
0.00400434	13	22	2.8165	Aminoacyl-tRNA synthetase		MSMEG_2621 MSMEG_2931 MSMEG_3003 MSMEG_3169 MSMEG_3777 MSMEG_4485 MSMEG_4959 MSMEG_5441 MSMEG_5671 MSMEG_6074 MSMEG_6094 MSMEG_6413 MSMEG_6917
0.00411824	8	10	3.81311	Mixed, incl. chromosome partition, and ctp synthase		MSMEG_3737 MSMEG_3738 MSMEG_3739 MSMEG_3740 MSMEG_3742 MSMEG_3743 MSMEG_3744 MSMEG_3745
0.00428129	7	8	4.17058	Mixed, incl. amine-lyase activity, and yebc-like		MSMEG_2932 MSMEG_2934 MSMEG_2935 MSMEG_2936 MSMEG_2937 MSMEG_2938 MSMEG_2939
0.0047122	122	432	1.34606	Heterocycle biosynthetic process	http://amigo.geneontology.org/amigo/term/GO:0018130	MSMEG_0001 MSMEG_0545 MSMEG_0678 MSMEG_0759 MSMEG_0783 MSMEG_0784 MSMEG_0789 MSMEG_0825 MSMEG_0826 MSMEG_0922 MSMEG_0943 MSMEG_0952 MSMEG_0953 MSMEG_0954 MSMEG_0956 MSMEG_1014 MSMEG_1367 MSMEG_1368 MSMEG_1484 MSMEG_1524 MSMEG_1819 MSMEG_1820 MSMEG_1825 MSMEG_1873 MSMEG_2363 MSMEG_2414 MSMEG_2540 MSMEG_2588 MSMEG_2607 MSMEG_2608 MSMEG_2614 MSMEG_2615 MSMEG_2616 MSMEG_2617 MSMEG_2618 MSMEG_2648 MSM…
0.0047122	244	954	1.21907	Heterocycle metabolic process	http://amigo.geneontology.org/amigo/term/GO:0046483	MSMEG_6947 MSMEG_0001 MSMEG_0005 MSMEG_0006 MSMEG_0014 MSMEG_0144 MSMEG_0202 MSMEG_0456 MSMEG_0457 MSMEG_0545 MSMEG_0580 MSMEG_0678 MSMEG_0725 MSMEG_0739 MSMEG_0759 MSMEG_0783 MSMEG_0784 MSMEG_0789 MSMEG_0825 MSMEG_0826 MSMEG_0903 MSMEG_0922 MSMEG_0943 MSMEG_0952 MSMEG_0953 MSMEG_0954 MSMEG_0956 MSMEG_1014 MSMEG_1047 MSMEG_1068 MSMEG_1249 MSMEG_1367 MSMEG_1368 MSMEG_1446 MSMEG_1484 MSMEG_1524 MSM…
0.00500632	36	96	1.78739	External encapsulating structure organization	http://amigo.geneontology.org/amigo/term/GO:0045229	MSMEG_0031 MSMEG_0233 MSMEG_0359 MSMEG_0361 MSMEG_0413 MSMEG_0928 MSMEG_0929 MSMEG_1824 MSMEG_1929 MSMEG_2395 MSMEG_3015 MSMEG_3027 MSMEG_4194 MSMEG_4227 MSMEG_4230 MSMEG_4232 MSMEG_4733 MSMEG_4947 MSMEG_5067 MSMEG_5416 MSMEG_5426 MSMEG_6113 MSMEG_6276 MSMEG_6277 MSMEG_6367 MSMEG_6372 MSMEG_6382 MSMEG_6385 MSMEG_6386 MSMEG_6387 MSMEG_6388 MSMEG_6389 MSMEG_6400 MSMEG_6401 MSMEG_6403 MSMEG_6404
0.00503826	63	196	1.53205	Nucleoside phosphate metabolic process	http://amigo.geneontology.org/amigo/term/GO:0006753	MSMEG_0545 MSMEG_0580 MSMEG_0678 MSMEG_0759 MSMEG_0783 MSMEG_0784 MSMEG_0903 MSMEG_0922 MSMEG_1484 MSMEG_1811 MSMEG_1819 MSMEG_1820 MSMEG_1873 MSMEG_2363 MSMEG_2414 MSMEG_2470 MSMEG_2540 MSMEG_2683 MSMEG_2693 MSMEG_2765 MSMEG_2932 MSMEG_2938 MSMEG_2964 MSMEG_2997 MSMEG_3043 MSMEG_3044 MSMEG_3051 MSMEG_3054 MSMEG_3086 MSMEG_3228 MSMEG_3507 MSMEG_3512 MSMEG_3739 MSMEG_3745 MSMEG_3812 MSMEG_4198 MSM…
0.00548505	16	31	2.46007	Mixed, incl. glycosyltransferase family 28 n-terminal domain, and methyltransferase domain		MSMEG_0381 MSMEG_0382 MSMEG_0388 MSMEG_0389 MSMEG_0390 MSMEG_0391 MSMEG_0408 MSMEG_0409 MSMEG_0410 MSMEG_0413 MSMEG_2542 MSMEG_2544 MSMEG_4728 MSMEG_4739 MSMEG_4740 MSMEG_4741
0.00556818	17	34	2.38319	Purine nucleoside monophosphate metabolic process	http://amigo.geneontology.org/amigo/term/GO:0009126	MSMEG_0759 MSMEG_1484 MSMEG_1819 MSMEG_1820 MSMEG_2964 MSMEG_3051 MSMEG_4214 MSMEG_4270 MSMEG_5274 MSMEG_5515 MSMEG_5516 MSMEG_5798 MSMEG_5831 MSMEG_5832 MSMEG_5841 MSMEG_5847 MSMEG_5852
0.00556818	17	34	2.38319	Purine ribonucleoside monophosphate metabolic process	http://amigo.geneontology.org/amigo/term/GO:0009167	MSMEG_0759 MSMEG_1484 MSMEG_1819 MSMEG_1820 MSMEG_2964 MSMEG_3051 MSMEG_4214 MSMEG_4270 MSMEG_5274 MSMEG_5515 MSMEG_5516 MSMEG_5798 MSMEG_5831 MSMEG_5832 MSMEG_5841 MSMEG_5847 MSMEG_5852
0.00572852	40	111	1.71762	Cell wall organization or biogenesis	http://amigo.geneontology.org/amigo/term/GO:0071554	MSMEG_0031 MSMEG_0233 MSMEG_0361 MSMEG_0413 MSMEG_0928 MSMEG_0929 MSMEG_1528 MSMEG_1529 MSMEG_1824 MSMEG_2395 MSMEG_3015 MSMEG_3027 MSMEG_4194 MSMEG_4227 MSMEG_4230 MSMEG_4232 MSMEG_4733 MSMEG_4947 MSMEG_5067 MSMEG_5416 MSMEG_5426 MSMEG_5439 MSMEG_6113 MSMEG_6276 MSMEG_6277 MSMEG_6367 MSMEG_6372 MSMEG_6382 MSMEG_6385 MSMEG_6386 MSMEG_6387 MSMEG_6388 MSMEG_6389 MSMEG_6396 MSMEG_6398 MSMEG_6400 MSM…
0.00584252	10	15	3.17759	Mixed, incl. glycolipid biosynthetic process, and peptidase, metallopeptidase		MSMEG_0758 MSMEG_1567 MSMEG_1684 MSMEG_2363 MSMEG_2761 MSMEG_4239 MSMEG_4241 MSMEG_4752 MSMEG_5130 MSMEG_5785
0.00658197	52	156	1.58879	Ribose phosphate metabolic process	http://amigo.geneontology.org/amigo/term/GO:0019693	MSMEG_0545 MSMEG_0580 MSMEG_0759 MSMEG_0783 MSMEG_0784 MSMEG_0903 MSMEG_1484 MSMEG_1819 MSMEG_1820 MSMEG_1873 MSMEG_2363 MSMEG_2414 MSMEG_2470 MSMEG_2540 MSMEG_2938 MSMEG_2964 MSMEG_2997 MSMEG_3043 MSMEG_3044 MSMEG_3051 MSMEG_3054 MSMEG_3086 MSMEG_3228 MSMEG_3507 MSMEG_3745 MSMEG_3812 MSMEG_4198 MSMEG_4214 MSMEG_4270 MSMEG_4627 MSMEG_4937 MSMEG_4938 MSMEG_4939 MSMEG_4940 MSMEG_4941 MSMEG_4942 MSM…
0.00753268	62	195	1.51546	Nucleotide metabolic process	http://amigo.geneontology.org/amigo/term/GO:0009117	MSMEG_0545 MSMEG_0580 MSMEG_0678 MSMEG_0759 MSMEG_0783 MSMEG_0784 MSMEG_0903 MSMEG_0922 MSMEG_1484 MSMEG_1811 MSMEG_1819 MSMEG_1820 MSMEG_1873 MSMEG_2363 MSMEG_2414 MSMEG_2470 MSMEG_2540 MSMEG_2683 MSMEG_2693 MSMEG_2765 MSMEG_2932 MSMEG_2938 MSMEG_2964 MSMEG_2997 MSMEG_3043 MSMEG_3044 MSMEG_3051 MSMEG_3054 MSMEG_3086 MSMEG_3228 MSMEG_3507 MSMEG_3512 MSMEG_3739 MSMEG_3812 MSMEG_4198 MSMEG_4214 MSM…
0.00777007	52	157	1.57867	Transferase activity, transferring one-carbon groups	http://amigo.geneontology.org/amigo/term/GO:0016741	MSMEG_0014 MSMEG_0095 MSMEG_0388 MSMEG_0391 MSMEG_0614 MSMEG_0629 MSMEG_0739 MSMEG_0913 MSMEG_1049 MSMEG_1050 MSMEG_1115 MSMEG_1350 MSMEG_1351 MSMEG_1479 MSMEG_1481 MSMEG_1482 MSMEG_1636 MSMEG_1646 MSMEG_1650 MSMEG_1888 MSMEG_1893 MSMEG_2350 MSMEG_2359 MSMEG_2413 MSMEG_2438 MSMEG_2618 MSMEG_2683 MSMEG_2773 MSMEG_3043 MSMEG_3064 MSMEG_3538 MSMEG_3751 MSMEG_3772 MSMEG_3790 MSMEG_3873 MSMEG_3877 MSM…
0.00789438	9	13	3.2998	Mixed, incl. folic acid metabolic process, and epoxide metabolic process		MSMEG_2698 MSMEG_6096 MSMEG_6098 MSMEG_6100 MSMEG_6101 MSMEG_6102 MSMEG_6103 MSMEG_6104 MSMEG_6109
0.00789438	15	29	2.46537	Lysine biosynthesis, and arginine biosynthetic process		MSMEG_0560 MSMEG_2684 MSMEG_2685 MSMEG_2691 MSMEG_3770 MSMEG_3772 MSMEG_3773 MSMEG_3774 MSMEG_4956 MSMEG_4957 MSMEG_4958 MSMEG_5104 MSMEG_5121 MSMEG_6256 MSMEG_6257
0.00789438	9	13	3.2998	FecCD transport family, and ABC transporter periplasmic binding domain		MSMEG_0011 MSMEG_0012 MSMEG_0020 MSMEG_4557 MSMEG_4559 MSMEG_4560 MSMEG_4561 MSMEG_6062 MSMEG_6063
0.00789438	9	13	3.2998	Acyl-CoA thioesterase, double hotdog domain	https://www.ebi.ac.uk/interpro/entry/InterPro/IPR042171	MSMEG_0580 MSMEG_0942 MSMEG_2470 MSMEG_2938 MSMEG_2997 MSMEG_3228 MSMEG_3261 MSMEG_3812 MSMEG_6208
0.00790028	11	18	2.91279	Mixed, incl. chromosome partition, and s4 domain		MSMEG_3737 MSMEG_3738 MSMEG_3739 MSMEG_3740 MSMEG_3742 MSMEG_3743 MSMEG_3744 MSMEG_3745 MSMEG_3751 MSMEG_3753 MSMEG_3754
0.00793196	132	480	1.31075	Organic cyclic compound biosynthetic process	http://amigo.geneontology.org/amigo/term/GO:1901362	MSMEG_0001 MSMEG_0545 MSMEG_0678 MSMEG_0759 MSMEG_0783 MSMEG_0784 MSMEG_0789 MSMEG_0825 MSMEG_0826 MSMEG_0922 MSMEG_0943 MSMEG_0952 MSMEG_0953 MSMEG_0954 MSMEG_0956 MSMEG_1014 MSMEG_1367 MSMEG_1368 MSMEG_1484 MSMEG_1524 MSMEG_1819 MSMEG_1820 MSMEG_1825 MSMEG_1873 MSMEG_2363 MSMEG_2414 MSMEG_2540 MSMEG_2588 MSMEG_2607 MSMEG_2608 MSMEG_2614 MSMEG_2615 MSMEG_2616 MSMEG_2617 MSMEG_2618 MSMEG_2648 MSM…
0.00828326	273	1092	1.1916	Macromolecule metabolic process	http://amigo.geneontology.org/amigo/term/GO:0043170	MSMEG_6947 MSMEG_0001 MSMEG_0005 MSMEG_0006 MSMEG_0014 MSMEG_0024 MSMEG_0028 MSMEG_0030 MSMEG_0031 MSMEG_0096 MSMEG_0144 MSMEG_0202 MSMEG_0233 MSMEG_0246 MSMEG_0359 MSMEG_0361 MSMEG_0390 MSMEG_0456 MSMEG_0457 MSMEG_0627 MSMEG_0634 MSMEG_0725 MSMEG_0739 MSMEG_0765 MSMEG_0807 MSMEG_0824 MSMEG_0832 MSMEG_0858 MSMEG_0899 MSMEG_0928 MSMEG_0929 MSMEG_0936 MSMEG_0953 MSMEG_1014 MSMEG_1041 MSMEG_1249 MSM…
0.00894034	28	71	1.8797	Catalytic activity, acting on a trna	http://amigo.geneontology.org/amigo/term/GO:0140101	MSMEG_0014 MSMEG_0952 MSMEG_1199 MSMEG_1527 MSMEG_1636 MSMEG_2364 MSMEG_2365 MSMEG_2438 MSMEG_2621 MSMEG_2649 MSMEG_2931 MSMEG_3003 MSMEG_3064 MSMEG_3169 MSMEG_3777 MSMEG_4291 MSMEG_4485 MSMEG_4959 MSMEG_5432 MSMEG_5441 MSMEG_5671 MSMEG_6074 MSMEG_6094 MSMEG_6372 MSMEG_6413 MSMEG_6917 MSMEG_6926 MSMEG_6945
0.00894034	22	51	2.05609	Isopeptide bond		MSMEG_0314 MSMEG_0457 MSMEG_0759 MSMEG_1346 MSMEG_1445 MSMEG_1843 MSMEG_2373 MSMEG_2520 MSMEG_2621 MSMEG_3055 MSMEG_3773 MSMEG_4326 MSMEG_4692 MSMEG_4891 MSMEG_4920 MSMEG_4956 MSMEG_5789 MSMEG_5790 MSMEG_6159 MSMEG_6286 MSMEG_6897 MSMEG_6904
0.00925404	86	292	1.4038	P-loop containing nucleoside triphosphate hydrolase	https://www.ebi.ac.uk/interpro/entry/InterPro/IPR027417	MSMEG_6947 MSMEG_0017 MSMEG_0059 MSMEG_0061 MSMEG_0370 MSMEG_0551 MSMEG_0615 MSMEG_0617 MSMEG_0640 MSMEG_0759 MSMEG_0783 MSMEG_0858 MSMEG_0866 MSMEG_1046 MSMEG_1123 MSMEG_1316 MSMEG_1401 MSMEG_1484 MSMEG_1540 MSMEG_1577 MSMEG_1642 MSMEG_1858 MSMEG_1873 MSMEG_1881 MSMEG_1889 MSMEG_2089 MSMEG_2502 MSMEG_2588 MSMEG_2610 MSMEG_2615 MSMEG_2616 MSMEG_2617 MSMEG_2728 MSMEG_2788 MSMEG_3031 MSMEG_3051 MSM…
0.0094782	12	21	2.72365	Methionine biosynthetic process	http://amigo.geneontology.org/amigo/term/GO:0009086	MSMEG_0239 MSMEG_0769 MSMEG_1651 MSMEG_1652 MSMEG_1753 MSMEG_2359 MSMEG_4957 MSMEG_5265 MSMEG_6256 MSMEG_6596 MSMEG_6638 MSMEG_6649
0.010195	8	11	3.46646	Mixed, incl. putative esterase, and pe-ppe domain		MSMEG_6391 MSMEG_6392 MSMEG_6393 MSMEG_6394 MSMEG_6395 MSMEG_6396 MSMEG_6397 MSMEG_6398
0.0107583	19	42	2.15622	Mostly uncharacterized, incl. transcription factor whib, and protein of unknown function duf4193		MSMEG_0007 MSMEG_0866 MSMEG_1597 MSMEG_1918 MSMEG_1934 MSMEG_2764 MSMEG_2766 MSMEG_2770 MSMEG_2779 MSMEG_3079 MSMEG_3080 MSMEG_3081 MSMEG_3246 MSMEG_3810 MSMEG_3885 MSMEG_4273 MSMEG_4922 MSMEG_4923 MSMEG_5691
0.0109992	23	55	1.99321	Ribonucleoside monophosphate metabolic process	http://amigo.geneontology.org/amigo/term/GO:0009161	MSMEG_0759 MSMEG_1484 MSMEG_1819 MSMEG_1820 MSMEG_1873 MSMEG_2964 MSMEG_3043 MSMEG_3044 MSMEG_3051 MSMEG_4198 MSMEG_4214 MSMEG_4270 MSMEG_5274 MSMEG_5427 MSMEG_5515 MSMEG_5516 MSMEG_5798 MSMEG_5831 MSMEG_5832 MSMEG_5841 MSMEG_5847 MSMEG_5852 MSMEG_6723
0.0111513	10	16	2.97899	Thioesterase-like superfamily	http://pfam.xfam.org/family/PF13622	MSMEG_0580 MSMEG_0942 MSMEG_2470 MSMEG_2586 MSMEG_2938 MSMEG_2997 MSMEG_3228 MSMEG_3261 MSMEG_3812 MSMEG_6208
0.0115367	5	5	4.76638	Folic acid metabolic process, and gtp cyclohydrolase i		MSMEG_6100 MSMEG_6101 MSMEG_6102 MSMEG_6103 MSMEG_6104
0.0115367	5	5	4.76638	Branched-chain amino acid transport, and leu/ile/val-binding protein		MSMEG_3247 MSMEG_3248 MSMEG_3249 MSMEG_3250 MSMEG_3251
0.0115367	5	5	4.76638	Mixed, incl. ribosomal protein s8, and ribosomal protein s19		MSMEG_1438 MSMEG_1440 MSMEG_1465 MSMEG_1468 MSMEG_1469
0.0115367	5	5	4.76638	Initiation factor, and Ribosomal_S15		MSMEG_1519 MSMEG_2519 MSMEG_2654 MSMEG_3050 MSMEG_3793
0.0115367	5	5	4.76638	Mixed, incl. domain of unknown function duf4395, and protein of unknown function duf1416		MSMEG_5788 MSMEG_5789 MSMEG_5790 MSMEG_5791 MSMEG_5792
0.0115367	16	33	2.31097	Purine nucleoside monophosphate biosynthetic process	http://amigo.geneontology.org/amigo/term/GO:0009127	MSMEG_0759 MSMEG_1484 MSMEG_1819 MSMEG_1820 MSMEG_2964 MSMEG_4214 MSMEG_4270 MSMEG_5274 MSMEG_5515 MSMEG_5516 MSMEG_5798 MSMEG_5831 MSMEG_5832 MSMEG_5841 MSMEG_5847 MSMEG_5852
0.0115367	16	33	2.31097	Purine ribonucleoside monophosphate biosynthetic process	http://amigo.geneontology.org/amigo/term/GO:0009168	MSMEG_0759 MSMEG_1484 MSMEG_1819 MSMEG_1820 MSMEG_2964 MSMEG_4214 MSMEG_4270 MSMEG_5274 MSMEG_5515 MSMEG_5516 MSMEG_5798 MSMEG_5831 MSMEG_5832 MSMEG_5841 MSMEG_5847 MSMEG_5852
0.0115367	5	5	4.76638	tRNA/rRNA methyltransferase, SpoU type	https://www.ebi.ac.uk/interpro/entry/InterPro/IPR001537	MSMEG_0739 MSMEG_1636 MSMEG_3790 MSMEG_5687 MSMEG_6073
0.0115367	22	52	2.01655	Ubl conjugation		MSMEG_0314 MSMEG_0457 MSMEG_0759 MSMEG_1346 MSMEG_1445 MSMEG_1843 MSMEG_2373 MSMEG_2520 MSMEG_2621 MSMEG_3055 MSMEG_3773 MSMEG_4326 MSMEG_4692 MSMEG_4891 MSMEG_4920 MSMEG_4956 MSMEG_5789 MSMEG_5790 MSMEG_6159 MSMEG_6286 MSMEG_6897 MSMEG_6904
0.0115367	5	5	4.76638	SpoU rRNA Methylase family	http://pfam.xfam.org/family/PF00588	MSMEG_0739 MSMEG_1636 MSMEG_3790 MSMEG_5687 MSMEG_6073
0.0119301	45	134	1.60065	Purine nucleotide metabolic process	http://amigo.geneontology.org/amigo/term/GO:0006163	MSMEG_0545 MSMEG_0580 MSMEG_0759 MSMEG_0783 MSMEG_0784 MSMEG_0903 MSMEG_1484 MSMEG_1819 MSMEG_1820 MSMEG_2363 MSMEG_2414 MSMEG_2470 MSMEG_2938 MSMEG_2964 MSMEG_2997 MSMEG_3051 MSMEG_3054 MSMEG_3086 MSMEG_3228 MSMEG_3507 MSMEG_3812 MSMEG_4214 MSMEG_4270 MSMEG_4483 MSMEG_4627 MSMEG_4937 MSMEG_4938 MSMEG_4939 MSMEG_4940 MSMEG_4941 MSMEG_4942 MSMEG_5274 MSMEG_5415 MSMEG_5422 MSMEG_5515 MSMEG_5516 MSM…
0.0119301	7	9	3.70719	acyl-CoA hydrolase activity	http://amigo.geneontology.org/amigo/term/GO:0047617	MSMEG_0580 MSMEG_2470 MSMEG_2938 MSMEG_2997 MSMEG_3228 MSMEG_3812 MSMEG_6208
0.0119301	7	9	3.70719	Cys/Met metabolism PLP-dependent enzyme	http://pfam.xfam.org/family/PF01053	MSMEG_0239 MSMEG_0769 MSMEG_1652 MSMEG_3189 MSMEG_5265 MSMEG_6351 MSMEG_6363
0.0119655	29	76	1.81875	tRNA metabolic process	http://amigo.geneontology.org/amigo/term/GO:0006399	MSMEG_0014 MSMEG_1527 MSMEG_1577 MSMEG_1580 MSMEG_1636 MSMEG_2438 MSMEG_2621 MSMEG_2649 MSMEG_2729 MSMEG_2778 MSMEG_2931 MSMEG_3003 MSMEG_3064 MSMEG_3169 MSMEG_3777 MSMEG_4291 MSMEG_4485 MSMEG_4687 MSMEG_4959 MSMEG_5441 MSMEG_5671 MSMEG_6074 MSMEG_6094 MSMEG_6111 MSMEG_6327 MSMEG_6413 MSMEG_6917 MSMEG_6926 MSMEG_6945
0.0129529	6	7	4.08547	Mixed, incl. mth1187/ykof-like, and alpha-1,6-mannosyltransferase activity		MSMEG_0231 MSMEG_0233 MSMEG_4253 MSMEG_4255 MSMEG_4256 MSMEG_4257
0.0129529	11	19	2.75948	IMP biosynthetic process	http://amigo.geneontology.org/amigo/term/GO:0006188	MSMEG_1819 MSMEG_1820 MSMEG_5274 MSMEG_5515 MSMEG_5516 MSMEG_5798 MSMEG_5831 MSMEG_5832 MSMEG_5841 MSMEG_5847 MSMEG_5852
0.0129529	11	19	2.75948	IMP metabolic process	http://amigo.geneontology.org/amigo/term/GO:0046040	MSMEG_1819 MSMEG_1820 MSMEG_5274 MSMEG_5515 MSMEG_5516 MSMEG_5798 MSMEG_5831 MSMEG_5832 MSMEG_5841 MSMEG_5847 MSMEG_5852
0.0129529	6	7	4.08547	Tetrapyrrole methylase	https://www.ebi.ac.uk/interpro/entry/InterPro/IPR000878	MSMEG_0954 MSMEG_2618 MSMEG_3873 MSMEG_3877 MSMEG_5445 MSMEG_5548
0.0129529	6	7	4.08547	Tetrapyrrole methylase, subdomain 1	https://www.ebi.ac.uk/interpro/entry/InterPro/IPR014777	MSMEG_0954 MSMEG_2618 MSMEG_3873 MSMEG_3877 MSMEG_5445 MSMEG_5548
0.0129529	6	7	4.08547	Tetrapyrrole methylase superfamily	https://www.ebi.ac.uk/interpro/entry/InterPro/IPR035996	MSMEG_0954 MSMEG_2618 MSMEG_3873 MSMEG_3877 MSMEG_5445 MSMEG_5548
0.0129529	32	87	1.75315	Acyltransferase		MSMEG_0390 MSMEG_0783 MSMEG_1579 MSMEG_1580 MSMEG_1615 MSMEG_1651 MSMEG_1924 MSMEG_2021 MSMEG_2691 MSMEG_2934 MSMEG_3187 MSMEG_3189 MSMEG_3490 MSMEG_3513 MSMEG_3860 MSMEG_3880 MSMEG_3901 MSMEG_4327 MSMEG_4578 MSMEG_4727 MSMEG_4920 MSMEG_5041 MSMEG_5104 MSMEG_5199 MSMEG_5273 MSMEG_5426 MSMEG_5672 MSMEG_5783 MSMEG_6271 MSMEG_6396 MSMEG_6398 MSMEG_6408
0.0129529	6	7	4.08547	Tetrapyrrole (Corrin/Porphyrin) Methylases	http://pfam.xfam.org/family/PF00590	MSMEG_0954 MSMEG_2618 MSMEG_3873 MSMEG_3877 MSMEG_5445 MSMEG_5548
0.0130914	135	500	1.28692	Small molecule biosynthetic process	http://amigo.geneontology.org/amigo/term/GO:0044283	MSMEG_0220 MSMEG_0239 MSMEG_0313 MSMEG_0408 MSMEG_0769 MSMEG_0789 MSMEG_0825 MSMEG_0826 MSMEG_0912 MSMEG_0922 MSMEG_0943 MSMEG_0948 MSMEG_0949 MSMEG_0954 MSMEG_1028 MSMEG_1041 MSMEG_1075 MSMEG_1115 MSMEG_1340 MSMEG_1342 MSMEG_1575 MSMEG_1651 MSMEG_1652 MSMEG_1753 MSMEG_1917 MSMEG_2201 MSMEG_2359 MSMEG_2363 MSMEG_2372 MSMEG_2373 MSMEG_2374 MSMEG_2379 MSMEG_2588 MSMEG_2607 MSMEG_2608 MSMEG_2616 MSM…
0.0135075	50	154	1.54753	Ribonucleotide metabolic process	http://amigo.geneontology.org/amigo/term/GO:0009259	MSMEG_0545 MSMEG_0580 MSMEG_0759 MSMEG_0783 MSMEG_0784 MSMEG_0903 MSMEG_1484 MSMEG_1819 MSMEG_1820 MSMEG_1873 MSMEG_2363 MSMEG_2414 MSMEG_2470 MSMEG_2540 MSMEG_2938 MSMEG_2964 MSMEG_2997 MSMEG_3043 MSMEG_3044 MSMEG_3051 MSMEG_3054 MSMEG_3086 MSMEG_3228 MSMEG_3507 MSMEG_3812 MSMEG_4198 MSMEG_4214 MSMEG_4270 MSMEG_4627 MSMEG_4937 MSMEG_4938 MSMEG_4939 MSMEG_4940 MSMEG_4941 MSMEG_4942 MSMEG_5274 MSM…
0.0137765	273	1103	1.17971	Membrane		MSMEG_0007 MSMEG_0012 MSMEG_0017 MSMEG_0025 MSMEG_0026 MSMEG_0028 MSMEG_0030 MSMEG_0031 MSMEG_0032 MSMEG_0034 MSMEG_0061 MSMEG_0082 MSMEG_0142 MSMEG_0143 MSMEG_0172 MSMEG_0220 MSMEG_0225 MSMEG_0226 MSMEG_0235 MSMEG_0236 MSMEG_0246 MSMEG_0264 MSMEG_0315 MSMEG_0317 MSMEG_0344 MSMEG_0359 MSMEG_0381 MSMEG_0382 MSMEG_0390 MSMEG_0410 MSMEG_0413 MSMEG_0439 MSMEG_0549 MSMEG_0617 MSMEG_0627 MSMEG_0634 MSM…
0.0150736	13	25	2.47852	RNA methylation	http://amigo.geneontology.org/amigo/term/GO:0001510	MSMEG_0739 MSMEG_1636 MSMEG_1646 MSMEG_2413 MSMEG_2438 MSMEG_2773 MSMEG_3751 MSMEG_3790 MSMEG_4502 MSMEG_5445 MSMEG_5687 MSMEG_6073 MSMEG_6940
0.0150736	13	25	2.47852	Methionine metabolic process	http://amigo.geneontology.org/amigo/term/GO:0006555	MSMEG_0239 MSMEG_0769 MSMEG_1485 MSMEG_1651 MSMEG_1652 MSMEG_1753 MSMEG_2359 MSMEG_4957 MSMEG_5265 MSMEG_6256 MSMEG_6596 MSMEG_6638 MSMEG_6649
0.0150736	13	25	2.47852	RNA methyltransferase activity	http://amigo.geneontology.org/amigo/term/GO:0008173	MSMEG_0739 MSMEG_1636 MSMEG_1646 MSMEG_2413 MSMEG_2438 MSMEG_2773 MSMEG_3751 MSMEG_3790 MSMEG_4502 MSMEG_5445 MSMEG_5687 MSMEG_6073 MSMEG_6940
0.015499	14	28	2.38319	Mixed, incl. methionine biosynthetic process, and atpase-coupled sulfate transmembrane transporter activity		MSMEG_0239 MSMEG_0769 MSMEG_1651 MSMEG_1652 MSMEG_1843 MSMEG_2359 MSMEG_2800 MSMEG_3055 MSMEG_4527 MSMEG_4528 MSMEG_5265 MSMEG_6596 MSMEG_6638 MSMEG_6649
0.0166567	67	222	1.4385	Cellular component organization	http://amigo.geneontology.org/amigo/term/GO:0016043	MSMEG_0005 MSMEG_0006 MSMEG_0031 MSMEG_0233 MSMEG_0359 MSMEG_0361 MSMEG_0413 MSMEG_0456 MSMEG_0457 MSMEG_0753 MSMEG_0824 MSMEG_0928 MSMEG_0929 MSMEG_0973 MSMEG_0974 MSMEG_1242 MSMEG_1316 MSMEG_1416 MSMEG_1540 MSMEG_1824 MSMEG_1929 MSMEG_2086 MSMEG_2395 MSMEG_2541 MSMEG_2691 MSMEG_2840 MSMEG_3015 MSMEG_3027 MSMEG_3791 MSMEG_4194 MSMEG_4218 MSMEG_4227 MSMEG_4230 MSMEG_4232 MSMEG_4578 MSMEG_4580 MSM…
0.01696	43	129	1.58879	Purine ribonucleotide metabolic process	http://amigo.geneontology.org/amigo/term/GO:0009150	MSMEG_0545 MSMEG_0580 MSMEG_0759 MSMEG_0783 MSMEG_0784 MSMEG_0903 MSMEG_1484 MSMEG_1819 MSMEG_1820 MSMEG_2363 MSMEG_2414 MSMEG_2470 MSMEG_2938 MSMEG_2964 MSMEG_2997 MSMEG_3051 MSMEG_3054 MSMEG_3086 MSMEG_3228 MSMEG_3507 MSMEG_3812 MSMEG_4214 MSMEG_4270 MSMEG_4627 MSMEG_4937 MSMEG_4938 MSMEG_4939 MSMEG_4940 MSMEG_4941 MSMEG_4942 MSMEG_5274 MSMEG_5415 MSMEG_5515 MSMEG_5516 MSMEG_5734 MSMEG_5798 MSM…
0.0177233	247	992	1.18679	Cellular aromatic compound metabolic process	http://amigo.geneontology.org/amigo/term/GO:0006725	MSMEG_6947 MSMEG_0001 MSMEG_0005 MSMEG_0006 MSMEG_0014 MSMEG_0144 MSMEG_0202 MSMEG_0456 MSMEG_0457 MSMEG_0545 MSMEG_0580 MSMEG_0628 MSMEG_0678 MSMEG_0725 MSMEG_0739 MSMEG_0759 MSMEG_0783 MSMEG_0784 MSMEG_0789 MSMEG_0825 MSMEG_0826 MSMEG_0903 MSMEG_0922 MSMEG_0952 MSMEG_0953 MSMEG_0954 MSMEG_0956 MSMEG_1014 MSMEG_1047 MSMEG_1068 MSMEG_1249 MSMEG_1367 MSMEG_1368 MSMEG_1446 MSMEG_1484 MSMEG_1524 MSM…
0.0181676	45	137	1.5656	Nucleotide biosynthetic process	http://amigo.geneontology.org/amigo/term/GO:0009165	MSMEG_0545 MSMEG_0678 MSMEG_0759 MSMEG_0783 MSMEG_0784 MSMEG_1484 MSMEG_1819 MSMEG_1820 MSMEG_1873 MSMEG_2363 MSMEG_2414 MSMEG_2540 MSMEG_2683 MSMEG_2693 MSMEG_2765 MSMEG_2964 MSMEG_3043 MSMEG_3044 MSMEG_3051 MSMEG_3054 MSMEG_3512 MSMEG_3739 MSMEG_4198 MSMEG_4214 MSMEG_4270 MSMEG_4581 MSMEG_4627 MSMEG_4937 MSMEG_4938 MSMEG_4939 MSMEG_4940 MSMEG_4941 MSMEG_4942 MSMEG_5274 MSMEG_5427 MSMEG_5515 MSM…
0.0185825	73	247	1.40869	Nucleobase-containing small molecule metabolic process	http://amigo.geneontology.org/amigo/term/GO:0055086	MSMEG_0545 MSMEG_0580 MSMEG_0678 MSMEG_0759 MSMEG_0783 MSMEG_0784 MSMEG_0903 MSMEG_0922 MSMEG_1484 MSMEG_1701 MSMEG_1753 MSMEG_1811 MSMEG_1819 MSMEG_1820 MSMEG_1825 MSMEG_1873 MSMEG_2363 MSMEG_2414 MSMEG_2470 MSMEG_2540 MSMEG_2614 MSMEG_2683 MSMEG_2693 MSMEG_2765 MSMEG_2932 MSMEG_2938 MSMEG_2964 MSMEG_2997 MSMEG_3042 MSMEG_3043 MSMEG_3044 MSMEG_3051 MSMEG_3054 MSMEG_3086 MSMEG_3228 MSMEG_3507 MSM…
0.0185938	70	235	1.41977	Organophosphate biosynthetic process	http://amigo.geneontology.org/amigo/term/GO:0090407	MSMEG_0545 MSMEG_0678 MSMEG_0758 MSMEG_0759 MSMEG_0783 MSMEG_0784 MSMEG_0789 MSMEG_0825 MSMEG_0826 MSMEG_0860 MSMEG_1484 MSMEG_1819 MSMEG_1820 MSMEG_1873 MSMEG_1920 MSMEG_2363 MSMEG_2414 MSMEG_2540 MSMEG_2543 MSMEG_2683 MSMEG_2692 MSMEG_2693 MSMEG_2765 MSMEG_2933 MSMEG_2934 MSMEG_2935 MSMEG_2937 MSMEG_2939 MSMEG_2964 MSMEG_3043 MSMEG_3044 MSMEG_3051 MSMEG_3054 MSMEG_3512 MSMEG_3739 MSMEG_3764 MSM…
0.0190529	94	333	1.34547	Organophosphate metabolic process	http://amigo.geneontology.org/amigo/term/GO:0019637	MSMEG_0314 MSMEG_0545 MSMEG_0580 MSMEG_0678 MSMEG_0758 MSMEG_0759 MSMEG_0783 MSMEG_0784 MSMEG_0789 MSMEG_0825 MSMEG_0826 MSMEG_0860 MSMEG_0898 MSMEG_0903 MSMEG_0922 MSMEG_1484 MSMEG_1811 MSMEG_1819 MSMEG_1820 MSMEG_1873 MSMEG_1920 MSMEG_2363 MSMEG_2414 MSMEG_2470 MSMEG_2540 MSMEG_2543 MSMEG_2683 MSMEG_2692 MSMEG_2693 MSMEG_2765 MSMEG_2932 MSMEG_2933 MSMEG_2934 MSMEG_2935 MSMEG_2937 MSMEG_2938 MSM…
0.0190529	54	172	1.49642	Cellular component biogenesis	http://amigo.geneontology.org/amigo/term/GO:0044085	MSMEG_0031 MSMEG_0233 MSMEG_0753 MSMEG_0928 MSMEG_0929 MSMEG_0973 MSMEG_0974 MSMEG_1242 MSMEG_1364 MSMEG_1416 MSMEG_1540 MSMEG_1646 MSMEG_1889 MSMEG_1929 MSMEG_2395 MSMEG_2413 MSMEG_2437 MSMEG_2685 MSMEG_2691 MSMEG_2773 MSMEG_3026 MSMEG_3027 MSMEG_3175 MSMEG_3738 MSMEG_3751 MSMEG_3791 MSMEG_4194 MSMEG_4218 MSMEG_4227 MSMEG_4230 MSMEG_4232 MSMEG_4502 MSMEG_4578 MSMEG_4580 MSMEG_4623 MSMEG_5042 MSM…
0.0191054	24	61	1.8753	Nucleoside monophosphate biosynthetic process	http://amigo.geneontology.org/amigo/term/GO:0009124	MSMEG_0678 MSMEG_0759 MSMEG_1484 MSMEG_1819 MSMEG_1820 MSMEG_2683 MSMEG_2765 MSMEG_2964 MSMEG_3043 MSMEG_3044 MSMEG_4198 MSMEG_4214 MSMEG_4270 MSMEG_5274 MSMEG_5427 MSMEG_5515 MSMEG_5516 MSMEG_5798 MSMEG_5831 MSMEG_5832 MSMEG_5841 MSMEG_5847 MSMEG_5852 MSMEG_6723
0.0191054	30	82	1.7438	Purine ribonucleotide biosynthetic process	http://amigo.geneontology.org/amigo/term/GO:0009152	MSMEG_0545 MSMEG_0759 MSMEG_0783 MSMEG_0784 MSMEG_1484 MSMEG_1819 MSMEG_1820 MSMEG_2363 MSMEG_2414 MSMEG_2964 MSMEG_3054 MSMEG_4214 MSMEG_4270 MSMEG_4627 MSMEG_4937 MSMEG_4938 MSMEG_4939 MSMEG_4940 MSMEG_4941 MSMEG_4942 MSMEG_5274 MSMEG_5515 MSMEG_5516 MSMEG_5798 MSMEG_5831 MSMEG_5832 MSMEG_5841 MSMEG_5847 MSMEG_5852 MSMEG_6096
0.0193956	8	12	3.17759	CoA hydrolase activity	http://amigo.geneontology.org/amigo/term/GO:0016289	MSMEG_0580 MSMEG_2470 MSMEG_2938 MSMEG_2997 MSMEG_3228 MSMEG_3628 MSMEG_3812 MSMEG_6208
0.0193956	8	12	3.17759	Nucleobase-containing compound kinase activity	http://amigo.geneontology.org/amigo/term/GO:0019205	MSMEG_1484 MSMEG_1873 MSMEG_2540 MSMEG_3051 MSMEG_3739 MSMEG_4270 MSMEG_4627 MSMEG_6723
0.0202446	40	119	1.60215	Ligase		MSMEG_0759 MSMEG_0836 MSMEG_1813 MSMEG_1819 MSMEG_2364 MSMEG_2365 MSMEG_2395 MSMEG_2469 MSMEG_2617 MSMEG_2621 MSMEG_2931 MSMEG_3003 MSMEG_3054 MSMEG_3073 MSMEG_3169 MSMEG_3770 MSMEG_3777 MSMEG_4232 MSMEG_4269 MSMEG_4310 MSMEG_4485 MSMEG_4959 MSMEG_5441 MSMEG_5524 MSMEG_5525 MSMEG_5671 MSMEG_5739 MSMEG_5798 MSMEG_5831 MSMEG_5832 MSMEG_5841 MSMEG_5852 MSMEG_6074 MSMEG_6094 MSMEG_6097 MSMEG_6111 MSM…
0.0205447	45	138	1.55425	Nucleoside phosphate biosynthetic process	http://amigo.geneontology.org/amigo/term/GO:1901293	MSMEG_0545 MSMEG_0678 MSMEG_0759 MSMEG_0783 MSMEG_0784 MSMEG_1484 MSMEG_1819 MSMEG_1820 MSMEG_1873 MSMEG_2363 MSMEG_2414 MSMEG_2540 MSMEG_2683 MSMEG_2693 MSMEG_2765 MSMEG_2964 MSMEG_3043 MSMEG_3044 MSMEG_3051 MSMEG_3054 MSMEG_3512 MSMEG_3739 MSMEG_4198 MSMEG_4214 MSMEG_4270 MSMEG_4581 MSMEG_4627 MSMEG_4937 MSMEG_4938 MSMEG_4939 MSMEG_4940 MSMEG_4941 MSMEG_4942 MSMEG_5274 MSMEG_5427 MSMEG_5515 MSM…
0.0208151	16	35	2.17892	Mixed, incl. fatty acid synthase activity, and coa carboxylase activity		MSMEG_1917 MSMEG_3150 MSMEG_3151 MSMEG_4326 MSMEG_4327 MSMEG_4756 MSMEG_4757 MSMEG_6391 MSMEG_6392 MSMEG_6393 MSMEG_6394 MSMEG_6395 MSMEG_6396 MSMEG_6397 MSMEG_6398 MSMEG_6635
0.0208151	16	35	2.17892	Nucleic acid-binding, OB-fold	https://www.ebi.ac.uk/interpro/entry/InterPro/IPR012340	MSMEG_1398 MSMEG_1439 MSMEG_1445 MSMEG_1519 MSMEG_2656 MSMEG_2773 MSMEG_3003 MSMEG_3035 MSMEG_3777 MSMEG_3833 MSMEG_4954 MSMEG_5696 MSMEG_5921 MSMEG_6094 MSMEG_6159 MSMEG_6896
0.0213069	20	48	1.98599	Mixed, incl. peptidoglycan biosynthesis, and lysozyme-like domain superfamily		MSMEG_0928 MSMEG_1575 MSMEG_2395 MSMEG_2433 MSMEG_4218 MSMEG_4220 MSMEG_4221 MSMEG_4227 MSMEG_4230 MSMEG_4232 MSMEG_4643 MSMEG_5439 MSMEG_5445 MSMEG_5700 MSMEG_6111 MSMEG_6113 MSMEG_6276 MSMEG_6277 MSMEG_6899 MSMEG_6900
0.0237647	40	120	1.58879	Transferase activity, transferring glycosyl groups	http://amigo.geneontology.org/amigo/term/GO:0016757	MSMEG_0311 MSMEG_0389 MSMEG_0627 MSMEG_1207 MSMEG_1208 MSMEG_1701 MSMEG_1826 MSMEG_2349 MSMEG_2699 MSMEG_2935 MSMEG_2964 MSMEG_3027 MSMEG_3042 MSMEG_3222 MSMEG_3546 MSMEG_3859 MSMEG_4180 MSMEG_4221 MSMEG_4227 MSMEG_4241 MSMEG_4253 MSMEG_4258 MSMEG_4275 MSMEG_4732 MSMEG_4735 MSMEG_4738 MSMEG_4740 MSMEG_4947 MSMEG_4987 MSMEG_5067 MSMEG_5416 MSMEG_6367 MSMEG_6386 MSMEG_6387 MSMEG_6388 MSMEG_6389 MSM…
0.0240635	26	69	1.79603	Mixed, incl. phosphopantetheine binding, and siderophore metabolic process		MSMEG_0014 MSMEG_0017 MSMEG_0022 MSMEG_0381 MSMEG_0382 MSMEG_0388 MSMEG_0389 MSMEG_0390 MSMEG_0391 MSMEG_0408 MSMEG_0409 MSMEG_0410 MSMEG_0413 MSMEG_2128 MSMEG_2542 MSMEG_2544 MSMEG_4524 MSMEG_4727 MSMEG_4728 MSMEG_4729 MSMEG_4730 MSMEG_4731 MSMEG_4732 MSMEG_4739 MSMEG_4740 MSMEG_4741
0.0240635	26	69	1.79603	ncRNA processing	http://amigo.geneontology.org/amigo/term/GO:0034470	MSMEG_0014 MSMEG_1527 MSMEG_1577 MSMEG_1580 MSMEG_1636 MSMEG_1646 MSMEG_2413 MSMEG_2437 MSMEG_2438 MSMEG_2649 MSMEG_2685 MSMEG_2729 MSMEG_2773 MSMEG_2778 MSMEG_3026 MSMEG_3064 MSMEG_3175 MSMEG_3751 MSMEG_4502 MSMEG_4687 MSMEG_5445 MSMEG_6111 MSMEG_6327 MSMEG_6926 MSMEG_6940 MSMEG_6945
0.0256906	9	15	2.85983	Mixed, incl. embc c-terminal domain, and capsule organization		MSMEG_0315 MSMEG_0317 MSMEG_0359 MSMEG_6143 MSMEG_6386 MSMEG_6387 MSMEG_6388 MSMEG_6389 MSMEG_6400
0.0263108	7	10	3.33647	Mixed, incl. fha domain, and regulation of binding		MSMEG_0028 MSMEG_0030 MSMEG_0031 MSMEG_0032 MSMEG_0034 MSMEG_1928 MSMEG_4243
0.0263108	7	10	3.33647	Protein transport		MSMEG_1483 MSMEG_1881 MSMEG_2961 MSMEG_2962 MSMEG_3087 MSMEG_3886 MSMEG_5069
0.0263108	7	10	3.33647	Translocation		MSMEG_1483 MSMEG_1881 MSMEG_2961 MSMEG_2962 MSMEG_3087 MSMEG_3886 MSMEG_5069
0.027601	36	106	1.61877	Ribose phosphate biosynthetic process	http://amigo.geneontology.org/amigo/term/GO:0046390	MSMEG_0545 MSMEG_0759 MSMEG_0783 MSMEG_0784 MSMEG_1484 MSMEG_1819 MSMEG_1820 MSMEG_2363 MSMEG_2414 MSMEG_2540 MSMEG_2964 MSMEG_3043 MSMEG_3044 MSMEG_3054 MSMEG_4198 MSMEG_4214 MSMEG_4270 MSMEG_4627 MSMEG_4937 MSMEG_4938 MSMEG_4939 MSMEG_4940 MSMEG_4941 MSMEG_4942 MSMEG_5274 MSMEG_5427 MSMEG_5515 MSMEG_5516 MSMEG_5798 MSMEG_5831 MSMEG_5832 MSMEG_5841 MSMEG_5847 MSMEG_5852 MSMEG_6096 MSMEG_6723
0.0278492	46	144	1.52259	Purine-containing compound metabolic process	http://amigo.geneontology.org/amigo/term/GO:0072521	MSMEG_0545 MSMEG_0580 MSMEG_0759 MSMEG_0783 MSMEG_0784 MSMEG_0903 MSMEG_1484 MSMEG_1819 MSMEG_1820 MSMEG_2363 MSMEG_2414 MSMEG_2470 MSMEG_2938 MSMEG_2964 MSMEG_2997 MSMEG_3051 MSMEG_3054 MSMEG_3086 MSMEG_3228 MSMEG_3507 MSMEG_3812 MSMEG_4214 MSMEG_4270 MSMEG_4483 MSMEG_4627 MSMEG_4937 MSMEG_4938 MSMEG_4939 MSMEG_4940 MSMEG_4941 MSMEG_4942 MSMEG_5274 MSMEG_5415 MSMEG_5422 MSMEG_5515 MSMEG_5516 MSM…
0.0289829	79	276	1.36429	Hydrolase activity, acting on acid anhydrides	http://amigo.geneontology.org/amigo/term/GO:0016817	MSMEG_0005 MSMEG_0006 MSMEG_0017 MSMEG_0456 MSMEG_0457 MSMEG_0551 MSMEG_0640 MSMEG_0858 MSMEG_0939 MSMEG_1046 MSMEG_1047 MSMEG_1316 MSMEG_1401 MSMEG_1446 MSMEG_1540 MSMEG_1642 MSMEG_1811 MSMEG_1827 MSMEG_1889 MSMEG_1958 MSMEG_2089 MSMEG_2422 MSMEG_2502 MSMEG_2610 MSMEG_2615 MSMEG_2728 MSMEG_2765 MSMEG_2788 MSMEG_2932 MSMEG_2936 MSMEG_3108 MSMEG_3119 MSMEG_3140 MSMEG_3215 MSMEG_3250 MSMEG_3251 MSM…
0.0289829	79	276	1.36429	Hydrolase activity, acting on acid anhydrides, in phosphorus-containing anhydrides	http://amigo.geneontology.org/amigo/term/GO:0016818	MSMEG_0005 MSMEG_0006 MSMEG_0017 MSMEG_0456 MSMEG_0457 MSMEG_0551 MSMEG_0640 MSMEG_0858 MSMEG_0939 MSMEG_1046 MSMEG_1047 MSMEG_1316 MSMEG_1401 MSMEG_1446 MSMEG_1540 MSMEG_1642 MSMEG_1811 MSMEG_1827 MSMEG_1889 MSMEG_1958 MSMEG_2089 MSMEG_2422 MSMEG_2502 MSMEG_2610 MSMEG_2615 MSMEG_2728 MSMEG_2765 MSMEG_2788 MSMEG_2932 MSMEG_2936 MSMEG_3108 MSMEG_3119 MSMEG_3140 MSMEG_3215 MSMEG_3250 MSMEG_3251 MSM…
0.0294114	10	18	2.64799	Lysine biosynthesis, and Threonine biosynthesis		MSMEG_0560 MSMEG_2684 MSMEG_2685 MSMEG_4956 MSMEG_4957 MSMEG_4958 MSMEG_5104 MSMEG_5121 MSMEG_6256 MSMEG_6257
0.0297938	43	133	1.54101	Methylation	http://amigo.geneontology.org/amigo/term/GO:0032259	MSMEG_0095 MSMEG_0388 MSMEG_0391 MSMEG_0614 MSMEG_0629 MSMEG_0739 MSMEG_0913 MSMEG_1049 MSMEG_1050 MSMEG_1115 MSMEG_1350 MSMEG_1351 MSMEG_1479 MSMEG_1481 MSMEG_1482 MSMEG_1636 MSMEG_1646 MSMEG_1650 MSMEG_1888 MSMEG_1893 MSMEG_2350 MSMEG_2359 MSMEG_2413 MSMEG_2438 MSMEG_2618 MSMEG_2683 MSMEG_2773 MSMEG_3538 MSMEG_3751 MSMEG_3790 MSMEG_3873 MSMEG_3877 MSMEG_4502 MSMEG_4739 MSMEG_4949 MSMEG_5445 MSM…
0.0325176	21	53	1.88857	Ribonucleoside monophosphate biosynthetic process	http://amigo.geneontology.org/amigo/term/GO:0009156	MSMEG_0759 MSMEG_1484 MSMEG_1819 MSMEG_1820 MSMEG_2964 MSMEG_3043 MSMEG_3044 MSMEG_4198 MSMEG_4214 MSMEG_4270 MSMEG_5274 MSMEG_5427 MSMEG_5515 MSMEG_5516 MSMEG_5798 MSMEG_5831 MSMEG_5832 MSMEG_5841 MSMEG_5847 MSMEG_5852 MSMEG_6723
0.0332487	18	43	1.99523	Transferase activity, transferring alkyl or aryl (other than methyl) groups	http://amigo.geneontology.org/amigo/term/GO:0016765	MSMEG_0239 MSMEG_0769 MSMEG_0789 MSMEG_0953 MSMEG_1133 MSMEG_1652 MSMEG_2616 MSMEG_2799 MSMEG_3055 MSMEG_3071 MSMEG_3073 MSMEG_3105 MSMEG_4490 MSMEG_5126 MSMEG_5265 MSMEG_6103 MSMEG_6401 MSMEG_6598
0.0333615	30	85	1.68225	Purine nucleotide biosynthetic process	http://amigo.geneontology.org/amigo/term/GO:0006164	MSMEG_0545 MSMEG_0759 MSMEG_0783 MSMEG_0784 MSMEG_1484 MSMEG_1819 MSMEG_1820 MSMEG_2363 MSMEG_2414 MSMEG_2964 MSMEG_3054 MSMEG_4214 MSMEG_4270 MSMEG_4627 MSMEG_4937 MSMEG_4938 MSMEG_4939 MSMEG_4940 MSMEG_4941 MSMEG_4942 MSMEG_5274 MSMEG_5515 MSMEG_5516 MSMEG_5798 MSMEG_5831 MSMEG_5832 MSMEG_5841 MSMEG_5847 MSMEG_5852 MSMEG_6096
0.0338304	6	8	3.57479	ATP synthesis		MSMEG_4937 MSMEG_4938 MSMEG_4939 MSMEG_4940 MSMEG_4941 MSMEG_4942
0.0338304	268	1099	1.16232	Organic cyclic compound metabolic process	http://amigo.geneontology.org/amigo/term/GO:1901360	MSMEG_6947 MSMEG_0001 MSMEG_0005 MSMEG_0006 MSMEG_0014 MSMEG_0144 MSMEG_0202 MSMEG_0456 MSMEG_0457 MSMEG_0545 MSMEG_0580 MSMEG_0628 MSMEG_0678 MSMEG_0725 MSMEG_0739 MSMEG_0759 MSMEG_0783 MSMEG_0784 MSMEG_0789 MSMEG_0825 MSMEG_0826 MSMEG_0903 MSMEG_0922 MSMEG_0943 MSMEG_0952 MSMEG_0953 MSMEG_0954 MSMEG_0956 MSMEG_1014 MSMEG_1047 MSMEG_1068 MSMEG_1249 MSMEG_1367 MSMEG_1368 MSMEG_1446 MSMEG_1484 MSM…
0.0338304	6	8	3.57479	Fatty acid metabolism		MSMEG_0220 MSMEG_3150 MSMEG_3151 MSMEG_4326 MSMEG_4727 MSMEG_4756
0.0338304	6	8	3.57479	Hydrogen ion transport		MSMEG_4937 MSMEG_4938 MSMEG_4939 MSMEG_4940 MSMEG_4941 MSMEG_4942
0.0338304	6	8	3.57479	Methionine biosynthesis		MSMEG_0769 MSMEG_1651 MSMEG_1753 MSMEG_4957 MSMEG_6256 MSMEG_6638
0.0350796	20	50	1.90655	Establishment of protein localization	http://amigo.geneontology.org/amigo/term/GO:0045184	MSMEG_0061 MSMEG_0065 MSMEG_0066 MSMEG_0617 MSMEG_0642 MSMEG_1416 MSMEG_1483 MSMEG_1881 MSMEG_1929 MSMEG_2960 MSMEG_2961 MSMEG_2962 MSMEG_3087 MSMEG_3533 MSMEG_3886 MSMEG_4674 MSMEG_4995 MSMEG_4996 MSMEG_5069 MSMEG_6942
0.0351566	17	40	2.02571	Mixed, incl. mycothiol metabolic process, and arsenical pump atpase, arsa/get3		MSMEG_0930 MSMEG_0932 MSMEG_0946 MSMEG_0948 MSMEG_0949 MSMEG_1416 MSMEG_1947 MSMEG_4193 MSMEG_4194 MSMEG_4250 MSMEG_5129 MSMEG_5262 MSMEG_5264 MSMEG_5783 MSMEG_6190 MSMEG_6193 MSMEG_6195
0.0358499	8	13	2.93316	Peptidoglycan synthesis		MSMEG_0031 MSMEG_0928 MSMEG_2395 MSMEG_4194 MSMEG_4227 MSMEG_4230 MSMEG_4232 MSMEG_5426
0.0360288	24	64	1.78739	Mostly uncharacterized, incl. transcription factor whib, and cell cycle		MSMEG_0007 MSMEG_0026 MSMEG_0866 MSMEG_1597 MSMEG_1918 MSMEG_1934 MSMEG_1935 MSMEG_1955 MSMEG_1958 MSMEG_1962 MSMEG_2764 MSMEG_2766 MSMEG_2770 MSMEG_2779 MSMEG_3079 MSMEG_3080 MSMEG_3081 MSMEG_3246 MSMEG_3810 MSMEG_3885 MSMEG_4273 MSMEG_4922 MSMEG_4923 MSMEG_5691
0.036105	258	1056	1.16451	Transmembrane		MSMEG_0007 MSMEG_0012 MSMEG_0017 MSMEG_0025 MSMEG_0026 MSMEG_0028 MSMEG_0030 MSMEG_0031 MSMEG_0032 MSMEG_0034 MSMEG_0061 MSMEG_0082 MSMEG_0142 MSMEG_0143 MSMEG_0172 MSMEG_0225 MSMEG_0226 MSMEG_0235 MSMEG_0236 MSMEG_0246 MSMEG_0264 MSMEG_0315 MSMEG_0317 MSMEG_0344 MSMEG_0359 MSMEG_0381 MSMEG_0382 MSMEG_0390 MSMEG_0410 MSMEG_0413 MSMEG_0439 MSMEG_0549 MSMEG_0617 MSMEG_0627 MSMEG_0634 MSMEG_0642 MSM…
0.0376583	5	6	3.97198	Urease activity, and nickel insertion		MSMEG_3623 MSMEG_3624 MSMEG_3625 MSMEG_3626 MSMEG_3627
0.0376583	5	6	3.97198	Mixed, incl. trcf domain, and arsc family		MSMEG_5422 MSMEG_5423 MSMEG_5424 MSMEG_5428 MSMEG_5429
0.0376583	5	6	3.97198	Mixed, incl. ribosomal protein l5, and ribosomal protein s13		MSMEG_1364 MSMEG_1467 MSMEG_1521 MSMEG_1522 MSMEG_3792
0.0376583	5	6	3.97198	Protein of unknown function DUF3558, and Type I protein exporter		MSMEG_1111 MSMEG_5005 MSMEG_5007 MSMEG_5008 MSMEG_5009
0.0376583	5	6	3.97198	Mixed, incl. protein of unknown function duf4233, and protein of unknown function duf3618		MSMEG_0758 MSMEG_1567 MSMEG_1684 MSMEG_2761 MSMEG_4752
0.0376583	5	6	3.97198	Membrane transport protein MmpL family, and Mycobacterium membrane protein		MSMEG_0225 MSMEG_0226 MSMEG_0227 MSMEG_3495 MSMEG_3496
0.0376583	16	37	2.06114	tRNA binding	http://amigo.geneontology.org/amigo/term/GO:0000049	MSMEG_1347 MSMEG_1398 MSMEG_1399 MSMEG_1435 MSMEG_1443 MSMEG_1467 MSMEG_1521 MSMEG_2931 MSMEG_3050 MSMEG_3169 MSMEG_3777 MSMEG_4291 MSMEG_4700 MSMEG_5132 MSMEG_6926 MSMEG_6945
0.0376583	215	866	1.18334	Cellular macromolecule metabolic process	http://amigo.geneontology.org/amigo/term/GO:0044260	MSMEG_6947 MSMEG_0001 MSMEG_0005 MSMEG_0006 MSMEG_0014 MSMEG_0024 MSMEG_0028 MSMEG_0030 MSMEG_0031 MSMEG_0096 MSMEG_0202 MSMEG_0233 MSMEG_0246 MSMEG_0359 MSMEG_0456 MSMEG_0457 MSMEG_0627 MSMEG_0634 MSMEG_0725 MSMEG_0739 MSMEG_0765 MSMEG_0824 MSMEG_0832 MSMEG_0858 MSMEG_0928 MSMEG_0929 MSMEG_0936 MSMEG_0953 MSMEG_1014 MSMEG_1041 MSMEG_1249 MSMEG_1265 MSMEG_1316 MSMEG_1339 MSMEG_1346 MSMEG_1347 MSM…
0.0376583	4	4	4.76638	De novo l-methionine biosynthetic process	http://amigo.geneontology.org/amigo/term/GO:0071266	MSMEG_0239 MSMEG_0769 MSMEG_1652 MSMEG_6256
0.0376583	4	4	4.76638	Aspartate/glutamate/uridylate kinase	https://www.ebi.ac.uk/interpro/entry/InterPro/IPR001048	MSMEG_2540 MSMEG_3774 MSMEG_4621 MSMEG_6257
0.0376583	4	4	4.76638	Aminoacyl-tRNA synthetase, class II (G/ P/ S/T)	https://www.ebi.ac.uk/interpro/entry/InterPro/IPR002314	MSMEG_2621 MSMEG_2931 MSMEG_4485 MSMEG_6413
0.0376583	5	6	3.97198	Aminoacyl-tRNA synthetase, class Ia, anticodon-binding	https://www.ebi.ac.uk/interpro/entry/InterPro/IPR009080	MSMEG_3169 MSMEG_4959 MSMEG_5441 MSMEG_6074 MSMEG_6917
0.0376583	4	4	4.76638	Protein of unknown function DUF3558	https://www.ebi.ac.uk/interpro/entry/InterPro/IPR024520	MSMEG_1395 MSMEG_1396 MSMEG_5005 MSMEG_5007
0.0376583	4	4	4.76638	Acetylglutamate kinase-like superfamily	https://www.ebi.ac.uk/interpro/entry/InterPro/IPR036393	MSMEG_2540 MSMEG_3774 MSMEG_4621 MSMEG_6257
0.0376583	4	4	4.76638	CF(0)		MSMEG_4939 MSMEG_4940 MSMEG_4941 MSMEG_4942
0.0376583	5	6	3.97198	Cobalamin biosynthesis		MSMEG_2588 MSMEG_2617 MSMEG_2618 MSMEG_4275 MSMEG_4310
0.0376583	5	6	3.97198	Fatty acid biosynthesis		MSMEG_0220 MSMEG_3150 MSMEG_3151 MSMEG_4326 MSMEG_4756
0.0376583	5	6	3.97198	Topoisomerase		MSMEG_0005 MSMEG_0006 MSMEG_0456 MSMEG_0457 MSMEG_6157
0.0376583	4	4	4.76638	Amino acid kinase family	http://pfam.xfam.org/family/PF00696	MSMEG_2540 MSMEG_3774 MSMEG_4621 MSMEG_6257
0.0376583	5	6	3.97198	DegT/DnrJ/EryC1/StrS aminotransferase family	http://pfam.xfam.org/family/PF01041	MSMEG_0239 MSMEG_0688 MSMEG_0769 MSMEG_3189 MSMEG_5265
0.0376583	5	6	3.97198	CobB/CobQ-like glutamine amidotransferase domain	http://pfam.xfam.org/family/PF07685	MSMEG_2588 MSMEG_2617 MSMEG_2939 MSMEG_5831 MSMEG_6277
0.0383671	35	105	1.58879	Ribonucleotide biosynthetic process	http://amigo.geneontology.org/amigo/term/GO:0009260	MSMEG_0545 MSMEG_0759 MSMEG_0783 MSMEG_0784 MSMEG_1484 MSMEG_1819 MSMEG_1820 MSMEG_2363 MSMEG_2414 MSMEG_2540 MSMEG_2964 MSMEG_3043 MSMEG_3044 MSMEG_3054 MSMEG_4198 MSMEG_4214 MSMEG_4270 MSMEG_4627 MSMEG_4937 MSMEG_4938 MSMEG_4939 MSMEG_4940 MSMEG_4941 MSMEG_4942 MSMEG_5274 MSMEG_5515 MSMEG_5516 MSMEG_5798 MSMEG_5831 MSMEG_5832 MSMEG_5841 MSMEG_5847 MSMEG_5852 MSMEG_6096 MSMEG_6723
0.0388316	9	16	2.68109	Aromatic amino acid biosynthesis		MSMEG_2799 MSMEG_3030 MSMEG_3031 MSMEG_3033 MSMEG_3219 MSMEG_3220 MSMEG_3221 MSMEG_4258 MSMEG_5536
0.0406916	43	136	1.50702	Methyltransferase activity	http://amigo.geneontology.org/amigo/term/GO:0008168	MSMEG_0095 MSMEG_0388 MSMEG_0391 MSMEG_0614 MSMEG_0629 MSMEG_0739 MSMEG_0913 MSMEG_1049 MSMEG_1050 MSMEG_1115 MSMEG_1350 MSMEG_1351 MSMEG_1479 MSMEG_1481 MSMEG_1482 MSMEG_1636 MSMEG_1646 MSMEG_1650 MSMEG_1888 MSMEG_1893 MSMEG_2350 MSMEG_2359 MSMEG_2413 MSMEG_2438 MSMEG_2618 MSMEG_2683 MSMEG_2773 MSMEG_3538 MSMEG_3751 MSMEG_3790 MSMEG_3873 MSMEG_3877 MSMEG_4502 MSMEG_4739 MSMEG_4949 MSMEG_5445 MSM…
0.0406916	20	51	1.86917	Ribonucleoprotein complex biogenesis	http://amigo.geneontology.org/amigo/term/GO:0022613	MSMEG_1364 MSMEG_1540 MSMEG_1646 MSMEG_1889 MSMEG_2413 MSMEG_2437 MSMEG_2685 MSMEG_2773 MSMEG_3026 MSMEG_3175 MSMEG_3738 MSMEG_3751 MSMEG_3791 MSMEG_4502 MSMEG_4580 MSMEG_4623 MSMEG_5042 MSMEG_5132 MSMEG_5445 MSMEG_6940
0.0406916	20	51	1.86917	Ribosome biogenesis	http://amigo.geneontology.org/amigo/term/GO:0042254	MSMEG_1364 MSMEG_1540 MSMEG_1646 MSMEG_1889 MSMEG_2413 MSMEG_2437 MSMEG_2685 MSMEG_2773 MSMEG_3026 MSMEG_3175 MSMEG_3738 MSMEG_3751 MSMEG_3791 MSMEG_4502 MSMEG_4580 MSMEG_4623 MSMEG_5042 MSMEG_5132 MSMEG_5445 MSMEG_6940
0.0426373	12	25	2.28786	Peptidoglycan biosynthesis, and cell division site		MSMEG_0928 MSMEG_1575 MSMEG_2395 MSMEG_4218 MSMEG_4220 MSMEG_4221 MSMEG_4227 MSMEG_4230 MSMEG_4232 MSMEG_5445 MSMEG_6276 MSMEG_6277
0.0426373	30	87	1.64358	Purine-containing compound biosynthetic process	http://amigo.geneontology.org/amigo/term/GO:0072522	MSMEG_0545 MSMEG_0759 MSMEG_0783 MSMEG_0784 MSMEG_1484 MSMEG_1819 MSMEG_1820 MSMEG_2363 MSMEG_2414 MSMEG_2964 MSMEG_3054 MSMEG_4214 MSMEG_4270 MSMEG_4627 MSMEG_4937 MSMEG_4938 MSMEG_4939 MSMEG_4940 MSMEG_4941 MSMEG_4942 MSMEG_5274 MSMEG_5515 MSMEG_5516 MSMEG_5798 MSMEG_5831 MSMEG_5832 MSMEG_5841 MSMEG_5847 MSMEG_5852 MSMEG_6096
0.0445205	73	257	1.35387	Carbohydrate derivative biosynthetic process	http://amigo.geneontology.org/amigo/term/GO:1901137	MSMEG_0031 MSMEG_0233 MSMEG_0545 MSMEG_0627 MSMEG_0678 MSMEG_0759 MSMEG_0783 MSMEG_0784 MSMEG_0928 MSMEG_0929 MSMEG_0946 MSMEG_1484 MSMEG_1568 MSMEG_1579 MSMEG_1819 MSMEG_1820 MSMEG_1825 MSMEG_1873 MSMEG_2363 MSMEG_2395 MSMEG_2414 MSMEG_2540 MSMEG_2614 MSMEG_2683 MSMEG_2765 MSMEG_2934 MSMEG_2935 MSMEG_2964 MSMEG_3027 MSMEG_3043 MSMEG_3044 MSMEG_3054 MSMEG_3546 MSMEG_3764 MSMEG_4194 MSMEG_4198 MSM…
0.0455607	105	391	1.27997	Carbohydrate derivative metabolic process	http://amigo.geneontology.org/amigo/term/GO:1901135	MSMEG_0031 MSMEG_0193 MSMEG_0233 MSMEG_0314 MSMEG_0361 MSMEG_0545 MSMEG_0580 MSMEG_0627 MSMEG_0678 MSMEG_0759 MSMEG_0783 MSMEG_0784 MSMEG_0898 MSMEG_0903 MSMEG_0922 MSMEG_0928 MSMEG_0929 MSMEG_0946 MSMEG_1484 MSMEG_1568 MSMEG_1579 MSMEG_1701 MSMEG_1753 MSMEG_1819 MSMEG_1820 MSMEG_1825 MSMEG_1873 MSMEG_2363 MSMEG_2395 MSMEG_2414 MSMEG_2470 MSMEG_2540 MSMEG_2611 MSMEG_2614 MSMEG_2683 MSMEG_2765 MSM…
0.046237	16	38	2.0069	Nucleotidyltransferase		MSMEG_0001 MSMEG_1014 MSMEG_1367 MSMEG_1368 MSMEG_1524 MSMEG_2414 MSMEG_2543 MSMEG_2656 MSMEG_3053 MSMEG_3833 MSMEG_4274 MSMEG_4293 MSMEG_4581 MSMEG_4979 MSMEG_5426 MSMEG_6926
0.0471481	7	11	3.03315	Mixed, incl. methyltransferase domain, and glycosyltransferase family 28 n-terminal domain		MSMEG_0381 MSMEG_0382 MSMEG_0388 MSMEG_0389 MSMEG_0390 MSMEG_0391 MSMEG_0413
0.0475346	253	1041	1.1584	Transmembrane helix		MSMEG_0007 MSMEG_0012 MSMEG_0017 MSMEG_0025 MSMEG_0026 MSMEG_0028 MSMEG_0030 MSMEG_0031 MSMEG_0032 MSMEG_0034 MSMEG_0061 MSMEG_0082 MSMEG_0142 MSMEG_0143 MSMEG_0172 MSMEG_0225 MSMEG_0226 MSMEG_0235 MSMEG_0236 MSMEG_0246 MSMEG_0264 MSMEG_0315 MSMEG_0317 MSMEG_0344 MSMEG_0359 MSMEG_0381 MSMEG_0382 MSMEG_0390 MSMEG_0410 MSMEG_0413 MSMEG_0439 MSMEG_0549 MSMEG_0617 MSMEG_0627 MSMEG_0634 MSMEG_0642 MSM…
Overexpressed under carbone starvation
3.38e-09	42	72	2.92191	Mixed, incl. carbohydrate transport, and abc transporter, permease		MSMEG_1372 MSMEG_1373 MSMEG_1374 MSMEG_1704 MSMEG_1705 MSMEG_1706 MSMEG_1707 MSMEG_1708 MSMEG_1709 MSMEG_1710 MSMEG_1711 MSMEG_1712 MSMEG_1713 MSMEG_1714 MSMEG_1715 MSMEG_3094 MSMEG_3599 MSMEG_3606 MSMEG_4170 MSMEG_4171 MSMEG_4649 MSMEG_4650 MSMEG_4651 MSMEG_4652 MSMEG_4656 MSMEG_4657 MSMEG_4658 MSMEG_4664 MSMEG_4665 MSMEG_4666 MSMEG_5576 MSMEG_5577 MSMEG_6018 MSMEG_6019 MSMEG_6020 MSMEG_6021 MSM…
5.29e-07	43	85	2.53396	Mixed, incl. aldehyde dehydrogenase domain, and amp-dependent synthetase/ligase		MSMEG_0257 MSMEG_0581 MSMEG_0582 MSMEG_0900 MSMEG_0901 MSMEG_1098 MSMEG_1496 MSMEG_1497 MSMEG_1498 MSMEG_1543 MSMEG_1760 MSMEG_1762 MSMEG_1763 MSMEG_1764 MSMEG_1807 MSMEG_2035 MSMEG_2237 MSMEG_2238 MSMEG_2241 MSMEG_2449 MSMEG_2487 MSMEG_2488 MSMEG_2597 MSMEG_2959 MSMEG_3007 MSMEG_3131 MSMEG_3615 MSMEG_3847 MSMEG_5404 MSMEG_5464 MSMEG_5538 MSMEG_5650 MSMEG_5735 MSMEG_5826 MSMEG_5866 MSMEG_5908 MSM…
1.33e-06	32	56	2.86228	Mixed, incl. carbohydrate transport, and pentose and glucuronate interconversions		MSMEG_1372 MSMEG_1373 MSMEG_1374 MSMEG_1704 MSMEG_1705 MSMEG_1706 MSMEG_1707 MSMEG_1708 MSMEG_1709 MSMEG_1710 MSMEG_1711 MSMEG_1712 MSMEG_1713 MSMEG_1714 MSMEG_1715 MSMEG_3094 MSMEG_3599 MSMEG_3606 MSMEG_4170 MSMEG_4171 MSMEG_5576 MSMEG_5577 MSMEG_6018 MSMEG_6019 MSMEG_6020 MSMEG_6021 MSMEG_6022 MSMEG_6800 MSMEG_6801 MSMEG_6802 MSMEG_6803 MSMEG_6804
1.73e-06	14	15	4.67505	Quinone, and ATP synthesis coupled electron transport		MSMEG_2050 MSMEG_2051 MSMEG_2052 MSMEG_2053 MSMEG_2054 MSMEG_2055 MSMEG_2056 MSMEG_2057 MSMEG_2058 MSMEG_2059 MSMEG_2060 MSMEG_2061 MSMEG_2062 MSMEG_2063
1.73e-06	45	96	2.34796	Mixed, incl. aldehyde dehydrogenase domain, and amp-binding enzyme		MSMEG_0257 MSMEG_0581 MSMEG_0582 MSMEG_0900 MSMEG_0901 MSMEG_1098 MSMEG_1496 MSMEG_1497 MSMEG_1498 MSMEG_1543 MSMEG_1760 MSMEG_1762 MSMEG_1763 MSMEG_1764 MSMEG_1807 MSMEG_2035 MSMEG_2237 MSMEG_2238 MSMEG_2241 MSMEG_2449 MSMEG_2487 MSMEG_2488 MSMEG_2597 MSMEG_2959 MSMEG_3007 MSMEG_3131 MSMEG_3615 MSMEG_3847 MSMEG_5404 MSMEG_5464 MSMEG_5538 MSMEG_5650 MSMEG_5735 MSMEG_5826 MSMEG_5866 MSMEG_5908 MSM…
1.73e-06	62	152	2.04314	Carbohydrate metabolic process, and carbohydrate transport		MSMEG_0085 MSMEG_0088 MSMEG_0190 MSMEG_1358 MSMEG_1360 MSMEG_1361 MSMEG_1371 MSMEG_1372 MSMEG_1373 MSMEG_1374 MSMEG_1704 MSMEG_1705 MSMEG_1706 MSMEG_1707 MSMEG_1708 MSMEG_1709 MSMEG_1710 MSMEG_1711 MSMEG_1712 MSMEG_1713 MSMEG_1714 MSMEG_1715 MSMEG_2136 MSMEG_3094 MSMEG_3184 MSMEG_3186 MSMEG_3599 MSMEG_3606 MSMEG_3673 MSMEG_3688 MSMEG_3689 MSMEG_4170 MSMEG_4171 MSMEG_4649 MSMEG_4650 MSMEG_4651 MSM…
2.08e-06	17	21	4.05489	Mixed, incl. protein maturation, and hypf finger		MSMEG_2273 MSMEG_2275 MSMEG_2276 MSMEG_2702 MSMEG_2703 MSMEG_2705 MSMEG_2710 MSMEG_2711 MSMEG_2712 MSMEG_2713 MSMEG_2715 MSMEG_2716 MSMEG_2717 MSMEG_2718 MSMEG_2719 MSMEG_2720 MSMEG_2721
2.65e-06	31	56	2.77283	Mixed, incl. glycolysis / gluconeogenesis, and aldehyde dehydrogenase domain		MSMEG_0581 MSMEG_0582 MSMEG_0900 MSMEG_0901 MSMEG_1496 MSMEG_1497 MSMEG_1498 MSMEG_1543 MSMEG_1807 MSMEG_2035 MSMEG_2237 MSMEG_2238 MSMEG_2449 MSMEG_2487 MSMEG_2488 MSMEG_2959 MSMEG_3007 MSMEG_3615 MSMEG_5404 MSMEG_5538 MSMEG_5650 MSMEG_5735 MSMEG_5826 MSMEG_5866 MSMEG_6179 MSMEG_6239 MSMEG_6242 MSMEG_6314 MSMEG_6685 MSMEG_6687 MSMEG_6833
4.6e-06	25	41	3.05426	Carbohydrate transport, and abc transporter, permease		MSMEG_1372 MSMEG_1373 MSMEG_1374 MSMEG_1704 MSMEG_1705 MSMEG_1706 MSMEG_1707 MSMEG_1708 MSMEG_1709 MSMEG_1710 MSMEG_1711 MSMEG_1712 MSMEG_3599 MSMEG_3606 MSMEG_4170 MSMEG_4171 MSMEG_6018 MSMEG_6019 MSMEG_6020 MSMEG_6022 MSMEG_6800 MSMEG_6801 MSMEG_6802 MSMEG_6803 MSMEG_6804
6.42e-06	24	39	3.08245	Mixed, incl. universal stress protein a family, and nitroreductase-like		MSMEG_2140 MSMEG_2198 MSMEG_3937 MSMEG_3939 MSMEG_3942 MSMEG_3945 MSMEG_3946 MSMEG_3948 MSMEG_3947 MSMEG_3949 MSMEG_3950 MSMEG_3952 MSMEG_3955 MSMEG_4215 MSMEG_4361 MSMEG_5242 MSMEG_5243 MSMEG_5245 MSMEG_5246 MSMEG_5579 MSMEG_6674 MSMEG_6675 MSMEG_6676 MSMEG_6678
7.08e-06	19	27	3.52484	Mostly uncharacterized, incl. s4 domain, and cellular response to acidic ph		MSMEG_1778 MSMEG_1779 MSMEG_1780 MSMEG_1781 MSMEG_1782 MSMEG_1787 MSMEG_1940 MSMEG_2376 MSMEG_2377 MSMEG_3311 MSMEG_3312 MSMEG_6606 MSMEG_6607 MSMEG_6608 MSMEG_6610 MSMEG_6612 MSMEG_6614 MSMEG_6615 MSMEG_6616
7.08e-06	11	11	5.00898	Quinone		MSMEG_2050 MSMEG_2053 MSMEG_2054 MSMEG_2055 MSMEG_2056 MSMEG_2057 MSMEG_2058 MSMEG_2060 MSMEG_2061 MSMEG_2062 MSMEG_2063
1.73e-05	15	19	3.95446	Mixed, incl. nitroreductase-like, and response to hypoxia		MSMEG_2198 MSMEG_3942 MSMEG_3945 MSMEG_3946 MSMEG_3948 MSMEG_3947 MSMEG_3949 MSMEG_3950 MSMEG_3952 MSMEG_3955 MSMEG_4215 MSMEG_5242 MSMEG_5243 MSMEG_5245 MSMEG_5246
2.9e-05	10	10	5.00898	Response to carbohydrate, and putative sugar-binding domain		MSMEG_2547 MSMEG_3264 MSMEG_3265 MSMEG_3266 MSMEG_3267 MSMEG_3268 MSMEG_3269 MSMEG_3270 MSMEG_3271 MSMEG_3272
0.000134134	19	31	3.07002	Mostly uncharacterized, incl. carotenoid biosynthetic process, and stas domain		MSMEG_1786 MSMEG_1801 MSMEG_1802 MSMEG_1803 MSMEG_1804 MSMEG_2341 MSMEG_2343 MSMEG_2344 MSMEG_2346 MSMEG_2347 MSMEG_5398 MSMEG_5400 MSMEG_5401 MSMEG_5402 MSMEG_5540 MSMEG_5542 MSMEG_5543 MSMEG_5544 MSMEG_5547
0.00015035	14	19	3.69083	Mostly uncharacterized, incl. stas domain, and chab		MSMEG_1786 MSMEG_1801 MSMEG_1802 MSMEG_1803 MSMEG_1804 MSMEG_5398 MSMEG_5400 MSMEG_5401 MSMEG_5402 MSMEG_5540 MSMEG_5542 MSMEG_5543 MSMEG_5544 MSMEG_5547
0.000253664	25	49	2.5556	Mostly uncharacterized, incl. carotenoid biosynthetic process, and o-methyltransferase		MSMEG_0731 MSMEG_1786 MSMEG_1801 MSMEG_1802 MSMEG_1803 MSMEG_1804 MSMEG_2211 MSMEG_2342 MSMEG_2341 MSMEG_2343 MSMEG_2344 MSMEG_2346 MSMEG_2347 MSMEG_3083 MSMEG_5353 MSMEG_5354 MSMEG_5398 MSMEG_5400 MSMEG_5401 MSMEG_5402 MSMEG_5540 MSMEG_5542 MSMEG_5543 MSMEG_5544 MSMEG_5547
0.000420395	35	82	2.13798	Mixed, incl. response to hypoxia, and biosynthesis of unsaturated fatty acids		MSMEG_1623 MSMEG_1742 MSMEG_1743 MSMEG_1885 MSMEG_1886 MSMEG_2140 MSMEG_2198 MSMEG_3933 MSMEG_3937 MSMEG_3939 MSMEG_3942 MSMEG_3945 MSMEG_3946 MSMEG_3948 MSMEG_3947 MSMEG_3949 MSMEG_3950 MSMEG_3952 MSMEG_3955 MSMEG_4215 MSMEG_4361 MSMEG_5242 MSMEG_5243 MSMEG_5245 MSMEG_5246 MSMEG_5579 MSMEG_5769 MSMEG_5770 MSMEG_5773 MSMEG_6322 MSMEG_6674 MSMEG_6675 MSMEG_6676 MSMEG_6678 MSMEG_6836
0.000710549	9	10	4.50808	Mixed, incl. methane/phenol/toluene hydroxylase, and mmob/dmpm family		MSMEG_1970 MSMEG_1971 MSMEG_1972 MSMEG_1973 MSMEG_1974 MSMEG_1975 MSMEG_1976 MSMEG_1977 MSMEG_1979
0.000710549	16	26	3.08245	Oxidative phosphorylation		MSMEG_2050 MSMEG_2051 MSMEG_2052 MSMEG_2053 MSMEG_2054 MSMEG_2055 MSMEG_2056 MSMEG_2057 MSMEG_2058 MSMEG_2059 MSMEG_2060 MSMEG_2061 MSMEG_2062 MSMEG_2063 MSMEG_5605 MSMEG_5606
0.000710549	11	14	3.93563	MmyB-like transcription regulator ligand binding	https://www.ebi.ac.uk/interpro/entry/InterPro/IPR041413	MSMEG_0260 MSMEG_0523 MSMEG_0609 MSMEG_1289 MSMEG_1626 MSMEG_1631 MSMEG_2211 MSMEG_2428 MSMEG_3132 MSMEG_3525 MSMEG_6794
0.000715401	14	21	3.33932	Mixed, incl. pentose transmembrane transport, and periplasmic binding protein		MSMEG_1372 MSMEG_1373 MSMEG_1374 MSMEG_1704 MSMEG_1705 MSMEG_1706 MSMEG_1707 MSMEG_1708 MSMEG_1709 MSMEG_1710 MSMEG_1711 MSMEG_1712 MSMEG_4170 MSMEG_4171
0.000738607	21	40	2.62972	Mixed, incl. aldehyde dehydrogenase domain, and acetyl-coa metabolic process		MSMEG_0581 MSMEG_0582 MSMEG_0900 MSMEG_0901 MSMEG_1496 MSMEG_1497 MSMEG_1498 MSMEG_1543 MSMEG_1807 MSMEG_2449 MSMEG_2487 MSMEG_2488 MSMEG_2959 MSMEG_3007 MSMEG_5404 MSMEG_5538 MSMEG_5650 MSMEG_5826 MSMEG_6179 MSMEG_6685 MSMEG_6687
0.00156189	26	57	2.2848	Mixed, incl. amino acid permease, and ethanolamine catabolic process		MSMEG_0268 MSMEG_0279 MSMEG_0496 MSMEG_0497 MSMEG_1411 MSMEG_1412 MSMEG_1413 MSMEG_1414 MSMEG_1507 MSMEG_1544 MSMEG_1546 MSMEG_1547 MSMEG_1548 MSMEG_1550 MSMEG_1552 MSMEG_1553 MSMEG_1554 MSMEG_1624 MSMEG_1625 MSMEG_1777 MSMEG_2525 MSMEG_2576 MSMEG_2971 MSMEG_6320 MSMEG_6321 MSMEG_6701
0.00190771	7	7	5.00898	Mixed, incl. hypf finger, and hupf/hypc family		MSMEG_2710 MSMEG_2711 MSMEG_2712 MSMEG_2713 MSMEG_2715 MSMEG_2716 MSMEG_2717
0.00214452	42	113	1.86175	Alcohol metabolic process	http://amigo.geneontology.org/amigo/term/GO:0006066	MSMEG_0127 MSMEG_0290 MSMEG_0603 MSMEG_1498 MSMEG_1553 MSMEG_1554 MSMEG_1604 MSMEG_1736 MSMEG_1987 MSMEG_2122 MSMEG_2123 MSMEG_2124 MSMEG_2449 MSMEG_2891 MSMEG_3083 MSMEG_3271 MSMEG_3524 MSMEG_3933 MSMEG_3948 MSMEG_4650 MSMEG_4664 MSMEG_4666 MSMEG_5242 MSMEG_5576 MSMEG_5903 MSMEG_5906 MSMEG_5907 MSMEG_5918 MSMEG_5925 MSMEG_5993 MSMEG_5995 MSMEG_5996 MSMEG_6011 MSMEG_6036 MSMEG_6041 MSMEG_6322 MSM…
0.00250716	17	31	2.74686	Mixed, incl. protein maturation, and nitrotoluene degradation		MSMEG_2273 MSMEG_2275 MSMEG_2276 MSMEG_2702 MSMEG_2703 MSMEG_2705 MSMEG_2710 MSMEG_2711 MSMEG_2712 MSMEG_2713 MSMEG_2715 MSMEG_2716 MSMEG_2717 MSMEG_2718 MSMEG_2719 MSMEG_2720 MSMEG_2721
0.00271784	21	43	2.44625	Mostly uncharacterized, incl. atpase family associated with various cellular activities (aaa), and von willebrand factor type a domain		MSMEG_1778 MSMEG_1779 MSMEG_1780 MSMEG_1781 MSMEG_1782 MSMEG_1787 MSMEG_1793 MSMEG_1797 MSMEG_1940 MSMEG_2376 MSMEG_2377 MSMEG_3311 MSMEG_3312 MSMEG_6606 MSMEG_6607 MSMEG_6608 MSMEG_6610 MSMEG_6612 MSMEG_6614 MSMEG_6615 MSMEG_6616
0.00410989	21	44	2.39065	Aldehyde/histidinol dehydrogenase	https://www.ebi.ac.uk/interpro/entry/InterPro/IPR016161	MSMEG_0327 MSMEG_0582 MSMEG_0889 MSMEG_0900 MSMEG_1498 MSMEG_1543 MSMEG_1762 MSMEG_2238 MSMEG_2449 MSMEG_2488 MSMEG_2597 MSMEG_3007 MSMEG_3205 MSMEG_3304 MSMEG_4038 MSMEG_4165 MSMEG_5119 MSMEG_5538 MSMEG_5656 MSMEG_6297 MSMEG_6687
0.00770657	23	52	2.21551	Oxidative phosphorylation, and cytochrome-c oxidase activity		MSMEG_0637 MSMEG_2050 MSMEG_2051 MSMEG_2052 MSMEG_2053 MSMEG_2054 MSMEG_2055 MSMEG_2056 MSMEG_2057 MSMEG_2058 MSMEG_2059 MSMEG_2060 MSMEG_2061 MSMEG_2062 MSMEG_2063 MSMEG_2064 MSMEG_2065 MSMEG_2067 MSMEG_4576 MSMEG_4812 MSMEG_5605 MSMEG_5606 MSMEG_5799
0.00782358	6	6	5.00898	4-aminobutyrate aminotransferase, bacterial, and Tyrosine metabolism		MSMEG_0581 MSMEG_0582 MSMEG_2959 MSMEG_3007 MSMEG_5538 MSMEG_6685
0.00782358	6	6	5.00898	Mixed, incl. periplasmic binding protein-like domain, and d-ribose transmembrane transport		MSMEG_1707 MSMEG_1708 MSMEG_1709 MSMEG_1710 MSMEG_1711 MSMEG_1712
0.011842	149	569	1.31167	Oxidoreductase		MSMEG_0301 MSMEG_0358 MSMEG_0374 MSMEG_0402 MSMEG_0407 MSMEG_0418 MSMEG_0427 MSMEG_0582 MSMEG_0590 MSMEG_0604 MSMEG_0667 MSMEG_0671 MSMEG_0675 MSMEG_0714 MSMEG_0744 MSMEG_0746 MSMEG_0762 MSMEG_0889 MSMEG_0900 MSMEG_1132 MSMEG_1140 MSMEG_1213 MSMEG_1296 MSMEG_1431 MSMEG_1496 MSMEG_1497 MSMEG_1498 MSMEG_1543 MSMEG_1736 MSMEG_1762 MSMEG_1775 MSMEG_1821 MSMEG_1839 MSMEG_1906 MSMEG_1908 MSMEG_1911 MSM…
0.0120356	10	15	3.33932	Mixed, incl. amino acid/polyamine transporter i, and ethanolamine ammonia-lyase complex		MSMEG_1411 MSMEG_1412 MSMEG_1413 MSMEG_1414 MSMEG_1552 MSMEG_1553 MSMEG_1554 MSMEG_1777 MSMEG_2525 MSMEG_6701
0.0120356	13	23	2.83116	NADH dehydrogenase activity	http://amigo.geneontology.org/amigo/term/GO:0003954	MSMEG_2050 MSMEG_2051 MSMEG_2052 MSMEG_2053 MSMEG_2054 MSMEG_2055 MSMEG_2057 MSMEG_2058 MSMEG_2060 MSMEG_2061 MSMEG_2062 MSMEG_2063 MSMEG_4812
0.0120356	13	23	2.83116	NADH dehydrogenase (quinone) activity	http://amigo.geneontology.org/amigo/term/GO:0050136	MSMEG_2050 MSMEG_2051 MSMEG_2052 MSMEG_2053 MSMEG_2054 MSMEG_2055 MSMEG_2057 MSMEG_2058 MSMEG_2060 MSMEG_2061 MSMEG_2062 MSMEG_2063 MSMEG_4812
0.0120356	19	41	2.32124	Aldehyde dehydrogenase domain	https://www.ebi.ac.uk/interpro/entry/InterPro/IPR015590	MSMEG_0327 MSMEG_0582 MSMEG_0889 MSMEG_0900 MSMEG_1498 MSMEG_1543 MSMEG_1762 MSMEG_2238 MSMEG_2449 MSMEG_2488 MSMEG_2597 MSMEG_3007 MSMEG_3304 MSMEG_4038 MSMEG_4165 MSMEG_5119 MSMEG_5538 MSMEG_6297 MSMEG_6687
0.0120356	19	41	2.32124	Aldehyde dehydrogenase, N-terminal	https://www.ebi.ac.uk/interpro/entry/InterPro/IPR016162	MSMEG_0327 MSMEG_0582 MSMEG_0889 MSMEG_0900 MSMEG_1498 MSMEG_1543 MSMEG_1762 MSMEG_2238 MSMEG_2449 MSMEG_2488 MSMEG_2597 MSMEG_3007 MSMEG_3304 MSMEG_4038 MSMEG_4165 MSMEG_5119 MSMEG_5538 MSMEG_6297 MSMEG_6687
0.0120356	19	41	2.32124	Aldehyde dehydrogenase, C-terminal	https://www.ebi.ac.uk/interpro/entry/InterPro/IPR016163	MSMEG_0327 MSMEG_0582 MSMEG_0889 MSMEG_0900 MSMEG_1498 MSMEG_1543 MSMEG_1762 MSMEG_2238 MSMEG_2449 MSMEG_2488 MSMEG_2597 MSMEG_3007 MSMEG_3304 MSMEG_4038 MSMEG_4165 MSMEG_5119 MSMEG_5538 MSMEG_6297 MSMEG_6687
0.0120356	19	41	2.32124	Aldehyde dehydrogenase family	http://pfam.xfam.org/family/PF00171	MSMEG_0327 MSMEG_0582 MSMEG_0889 MSMEG_0900 MSMEG_1498 MSMEG_1543 MSMEG_1762 MSMEG_2238 MSMEG_2449 MSMEG_2488 MSMEG_2597 MSMEG_3007 MSMEG_3304 MSMEG_4038 MSMEG_4165 MSMEG_5119 MSMEG_5538 MSMEG_6297 MSMEG_6687
0.0131998	15	29	2.59085	Mixed, incl. amino acid/polyamine transporter i, and purine catabolism purc-like domain		MSMEG_1411 MSMEG_1412 MSMEG_1413 MSMEG_1414 MSMEG_1507 MSMEG_1552 MSMEG_1553 MSMEG_1554 MSMEG_1624 MSMEG_1625 MSMEG_1777 MSMEG_2525 MSMEG_2576 MSMEG_2971 MSMEG_6701
0.0179771	35	98	1.78892	Mostly uncharacterized, incl. protein maturation, and oxidoreductase activity, acting on hydrogen as donor		MSMEG_1838 MSMEG_1839 MSMEG_1970 MSMEG_1971 MSMEG_1972 MSMEG_1973 MSMEG_1974 MSMEG_1975 MSMEG_1976 MSMEG_1977 MSMEG_1979 MSMEG_2273 MSMEG_2275 MSMEG_2276 MSMEG_2702 MSMEG_2703 MSMEG_2705 MSMEG_2706 MSMEG_2710 MSMEG_2711 MSMEG_2712 MSMEG_2713 MSMEG_2715 MSMEG_2716 MSMEG_2717 MSMEG_2718 MSMEG_2719 MSMEG_2720 MSMEG_2721 MSMEG_3006 MSMEG_3008 MSMEG_3724 MSMEG_3725 MSMEG_3726 MSMEG_6779
0.0202228	8	11	3.6429	Dehydratase medium subunit, and Dehydratase small subunit		MSMEG_0496 MSMEG_0497 MSMEG_1546 MSMEG_1547 MSMEG_1548 MSMEG_1550 MSMEG_6320 MSMEG_6321
0.0202228	8	11	3.6429	4-aminobutyrate:2-oxoglutarate transaminase activity, and Tyrosine metabolism		MSMEG_0581 MSMEG_0582 MSMEG_2487 MSMEG_2488 MSMEG_2959 MSMEG_3007 MSMEG_5538 MSMEG_6685
0.0202228	8	11	3.6429	Mixed, incl. heavy-metal-associated domain, and acetoin reductase		MSMEG_4358 MSMEG_5014 MSMEG_5015 MSMEG_5016 MSMEG_5019 MSMEG_5020 MSMEG_5021 MSMEG_5022
0.0202228	10	16	3.13061	Mixed, incl. inositol phosphate metabolism, and periplasmic binding protein		MSMEG_4649 MSMEG_4650 MSMEG_4651 MSMEG_4652 MSMEG_4656 MSMEG_4657 MSMEG_4658 MSMEG_4664 MSMEG_4665 MSMEG_4666
0.0202228	10	16	3.13061	NADH dehydrogenase (ubiquinone) activity	http://amigo.geneontology.org/amigo/term/GO:0008137	MSMEG_2050 MSMEG_2051 MSMEG_2052 MSMEG_2054 MSMEG_2057 MSMEG_2058 MSMEG_2061 MSMEG_2062 MSMEG_2063 MSMEG_4812
0.0202228	16	33	2.4286	Quinone binding	http://amigo.geneontology.org/amigo/term/GO:0048038	MSMEG_2050 MSMEG_2051 MSMEG_2052 MSMEG_2053 MSMEG_2054 MSMEG_2055 MSMEG_2056 MSMEG_2057 MSMEG_2058 MSMEG_2059 MSMEG_2060 MSMEG_2061 MSMEG_2062 MSMEG_2063 MSMEG_3847 MSMEG_4812
0.0202228	10	16	3.13061	Ferritin-like superfamily	https://www.ebi.ac.uk/interpro/entry/InterPro/IPR009078	MSMEG_0358 MSMEG_1971 MSMEG_1973 MSMEG_3419 MSMEG_3564 MSMEG_5549 MSMEG_5682 MSMEG_5773 MSMEG_6213 MSMEG_6467
0.0204607	5	5	5.00898	Mixed, incl. nramp family, and sporulation		MSMEG_1778 MSMEG_1779 MSMEG_1780 MSMEG_1781 MSMEG_1782
0.0204607	5	5	5.00898	Methane/phenol/toluene hydroxylase, and MmoB/DmpM family		MSMEG_1971 MSMEG_1972 MSMEG_1973 MSMEG_1974 MSMEG_1977
0.0204607	5	5	5.00898	Nitrate assimilation		MSMEG_5137 MSMEG_5138 MSMEG_5139 MSMEG_5140 MSMEG_5141
0.0204607	5	5	5.00898	Mixed, incl. cro/c1-type hth dna-binding domain, and fusaric acid resistance protein-like		MSMEG_5540 MSMEG_5542 MSMEG_5543 MSMEG_5544 MSMEG_5547
0.0204607	5	5	5.00898	Glycogen metabolism		MSMEG_3673 MSMEG_4916 MSMEG_4918 MSMEG_6514 MSMEG_6515
0.0204607	5	5	5.00898	Mixed, incl. ctp salvage, and dynamin family		MSMEG_6800 MSMEG_6801 MSMEG_6802 MSMEG_6803 MSMEG_6804
0.0204607	5	5	5.00898	Mixed, incl. maltose transport, and putative sugar-binding domain		MSMEG_5571 MSMEG_5572 MSMEG_5573 MSMEG_5574 MSMEG_5575
0.0204607	5	5	5.00898	Mixed, incl. cysa, c-terminal regulatory domain, and glycerol-3-phosphate transmembrane transporter activity		MSMEG_3266 MSMEG_3267 MSMEG_3268 MSMEG_3269 MSMEG_3270
0.0204607	5	5	5.00898	Histidine metabolism, and Formiminoglutamate deiminase		MSMEG_1179 MSMEG_1180 MSMEG_1181 MSMEG_1182 MSMEG_1183
0.0204607	5	5	5.00898	4-aminobutyrate transaminase activity	http://amigo.geneontology.org/amigo/term/GO:0003867	MSMEG_0581 MSMEG_1764 MSMEG_2487 MSMEG_2959 MSMEG_6685
0.0204607	5	5	5.00898	Gamma-aminobutyric acid metabolic process	http://amigo.geneontology.org/amigo/term/GO:0009448	MSMEG_0581 MSMEG_1764 MSMEG_2487 MSMEG_2959 MSMEG_6685
0.0204607	5	5	5.00898	Gamma-aminobutyric acid catabolic process	http://amigo.geneontology.org/amigo/term/GO:0009450	MSMEG_0581 MSMEG_1764 MSMEG_2487 MSMEG_2959 MSMEG_6685
0.0204607	17	37	2.30142	Response to decreased oxygen levels	http://amigo.geneontology.org/amigo/term/GO:0036293	MSMEG_0290 MSMEG_1130 MSMEG_1804 MSMEG_2752 MSMEG_3594 MSMEG_3933 MSMEG_3945 MSMEG_3948 MSMEG_3950 MSMEG_4361 MSMEG_5137 MSMEG_5140 MSMEG_5141 MSMEG_5242 MSMEG_5245 MSMEG_5733 MSMEG_6322
0.0204607	17	37	2.30142	Response to oxygen levels	http://amigo.geneontology.org/amigo/term/GO:0070482	MSMEG_0290 MSMEG_1130 MSMEG_1804 MSMEG_2752 MSMEG_3594 MSMEG_3933 MSMEG_3945 MSMEG_3948 MSMEG_3950 MSMEG_4361 MSMEG_5137 MSMEG_5140 MSMEG_5141 MSMEG_5242 MSMEG_5245 MSMEG_5733 MSMEG_6322
0.0204607	5	5	5.00898	Glycogen biosynthesis		MSMEG_4916 MSMEG_4918 MSMEG_5078 MSMEG_6514 MSMEG_6515
0.0218503	15	31	2.4237	Oxidoreductase activity, acting on nad(p)h, quinone or similar compound as acceptor	http://amigo.geneontology.org/amigo/term/GO:0016655	MSMEG_2050 MSMEG_2051 MSMEG_2052 MSMEG_2053 MSMEG_2054 MSMEG_2055 MSMEG_2056 MSMEG_2057 MSMEG_2058 MSMEG_2060 MSMEG_2061 MSMEG_2062 MSMEG_2063 MSMEG_2375 MSMEG_4812
0.0218503	15	31	2.4237	Alditol metabolic process	http://amigo.geneontology.org/amigo/term/GO:0019400	MSMEG_0290 MSMEG_1736 MSMEG_2122 MSMEG_2123 MSMEG_2124 MSMEG_3271 MSMEG_3933 MSMEG_3948 MSMEG_5242 MSMEG_5576 MSMEG_6322 MSMEG_6466 MSMEG_6759 MSMEG_6761 MSMEG_6788
0.0223267	6	7	4.29341	Mixed, incl. zeta toxin, and tagatose/fructose phosphokinase		MSMEG_3942 MSMEG_3947 MSMEG_3949 MSMEG_3950 MSMEG_3952 MSMEG_4215
0.0223267	9	14	3.22006	Mixed, incl. stas domain, and chab		MSMEG_1786 MSMEG_1801 MSMEG_1802 MSMEG_1803 MSMEG_1804 MSMEG_5398 MSMEG_5400 MSMEG_5401 MSMEG_5402
0.0223267	6	7	4.29341	Mixed, incl. carbon-monoxide dehydrogenase, large subunit, and xdhc- coxi		MSMEG_0744 MSMEG_0745 MSMEG_0746 MSMEG_0747 MSMEG_0748 MSMEG_0749
0.0242532	21	51	2.06252	AMP-binding enzyme, C-terminal domain	https://www.ebi.ac.uk/interpro/entry/InterPro/IPR025110	MSMEG_0019 MSMEG_0257 MSMEG_0304 MSMEG_0318 MSMEG_0402 MSMEG_0599 MSMEG_1062 MSMEG_1098 MSMEG_1982 MSMEG_2216 MSMEG_2217 MSMEG_2241 MSMEG_2883 MSMEG_3694 MSMEG_3715 MSMEG_4019 MSMEG_5404 MSMEG_5649 MSMEG_5650 MSMEG_5908 MSMEG_6179
0.026627	17	38	2.24086	Mixed, incl. protein maturation, and oxidoreductase activity, acting on hydrogen as donor		MSMEG_2273 MSMEG_2275 MSMEG_2276 MSMEG_2702 MSMEG_2703 MSMEG_2705 MSMEG_2710 MSMEG_2711 MSMEG_2712 MSMEG_2713 MSMEG_2715 MSMEG_2716 MSMEG_2717 MSMEG_2718 MSMEG_2719 MSMEG_2720 MSMEG_2721
0.0272246	10	17	2.94646	UspA	https://www.ebi.ac.uk/interpro/entry/InterPro/IPR006016	MSMEG_1411 MSMEG_1624 MSMEG_3939 MSMEG_3945 MSMEG_3950 MSMEG_4362 MSMEG_5245 MSMEG_5372 MSMEG_5474 MSMEG_5733
0.0272246	10	17	2.94646	Universal stress protein family	http://pfam.xfam.org/family/PF00582	MSMEG_1411 MSMEG_1624 MSMEG_3939 MSMEG_3945 MSMEG_3950 MSMEG_4362 MSMEG_5245 MSMEG_5372 MSMEG_5474 MSMEG_5733
0.0275072	22	55	2.00359	AMP-binding enzyme C-terminal domain	http://pfam.xfam.org/family/PF13193	MSMEG_0019 MSMEG_0257 MSMEG_0304 MSMEG_0318 MSMEG_0402 MSMEG_0599 MSMEG_1062 MSMEG_1098 MSMEG_1982 MSMEG_2215 MSMEG_2216 MSMEG_2217 MSMEG_2241 MSMEG_2883 MSMEG_3694 MSMEG_3715 MSMEG_4019 MSMEG_5404 MSMEG_5649 MSMEG_5650 MSMEG_5908 MSMEG_6179
0.0312644	14	29	2.41813	Glycerol metabolic process	http://amigo.geneontology.org/amigo/term/GO:0006071	MSMEG_0290 MSMEG_1736 MSMEG_2122 MSMEG_2123 MSMEG_2124 MSMEG_3271 MSMEG_3933 MSMEG_3948 MSMEG_5242 MSMEG_6322 MSMEG_6466 MSMEG_6759 MSMEG_6761 MSMEG_6788
0.0415331	9	15	3.00539	Glycogen metabolic process, and alpha-glucan catabolic process		MSMEG_2136 MSMEG_3184 MSMEG_3186 MSMEG_3673 MSMEG_4916 MSMEG_4918 MSMEG_5078 MSMEG_6514 MSMEG_6515
0.0426417	7	10	3.50629	Alpha amylase, catalytic domain		MSMEG_3184 MSMEG_3186 MSMEG_3673 MSMEG_4916 MSMEG_4918 MSMEG_6514 MSMEG_6515
0.0426417	7	10	3.50629	Monosaccharide transmembrane transporter activity	http://amigo.geneontology.org/amigo/term/GO:0015145	MSMEG_1372 MSMEG_1705 MSMEG_1711 MSMEG_4170 MSMEG_4656 MSMEG_6019 MSMEG_6802
0.0426417	7	10	3.50629	Pentose transmembrane transporter activity	http://amigo.geneontology.org/amigo/term/GO:0015146	MSMEG_1372 MSMEG_1705 MSMEG_1711 MSMEG_4170 MSMEG_4656 MSMEG_6019 MSMEG_6802
0.0426417	7	10	3.50629	ATPase-coupled monosaccharide transmembrane transporter activity	http://amigo.geneontology.org/amigo/term/GO:0015407	MSMEG_1372 MSMEG_1705 MSMEG_1711 MSMEG_4170 MSMEG_4656 MSMEG_6019 MSMEG_6802
0.0426417	7	10	3.50629	Monosaccharide transmembrane transport	http://amigo.geneontology.org/amigo/term/GO:0015749	MSMEG_1372 MSMEG_1705 MSMEG_1711 MSMEG_4170 MSMEG_4656 MSMEG_6019 MSMEG_6802
0.0426417	7	10	3.50629	Pentose transmembrane transport	http://amigo.geneontology.org/amigo/term/GO:0015750	MSMEG_1372 MSMEG_1705 MSMEG_1711 MSMEG_4170 MSMEG_4656 MSMEG_6019 MSMEG_6802
0.0426417	7	10	3.50629	Sugar transmembrane transporter activity	http://amigo.geneontology.org/amigo/term/GO:0051119	MSMEG_1372 MSMEG_1705 MSMEG_1711 MSMEG_4170 MSMEG_4656 MSMEG_6019 MSMEG_6802
0.0435317	10	18	2.78277	Mixed, incl. xdhc- coxi, and carbon monoxide dehydrogenase subunit g		MSMEG_0743 MSMEG_0744 MSMEG_0745 MSMEG_0746 MSMEG_0747 MSMEG_0748 MSMEG_0749 MSMEG_5875 MSMEG_5877 MSMEG_5878
0.0435317	10	18	2.78277	Aldehyde dehydrogenase, cysteine active site	https://www.ebi.ac.uk/interpro/entry/InterPro/IPR016160	MSMEG_0900 MSMEG_1498 MSMEG_1543 MSMEG_2449 MSMEG_2597 MSMEG_3007 MSMEG_4038 MSMEG_4165 MSMEG_5119 MSMEG_6687
0.0441101	12	24	2.50449	Steroid catabolic process	http://amigo.geneontology.org/amigo/term/GO:0006706	MSMEG_0603 MSMEG_3083 MSMEG_3524 MSMEG_5906 MSMEG_5907 MSMEG_5918 MSMEG_5993 MSMEG_5995 MSMEG_5996 MSMEG_6036 MSMEG_6041 MSMEG_6512
0.0441101	12	24	2.50449	Cholesterol catabolic process	http://amigo.geneontology.org/amigo/term/GO:0006707	MSMEG_0603 MSMEG_3083 MSMEG_3524 MSMEG_5906 MSMEG_5907 MSMEG_5918 MSMEG_5993 MSMEG_5995 MSMEG_5996 MSMEG_6036 MSMEG_6041 MSMEG_6512
0.0441101	17	40	2.12882	Cholesterol metabolic process	http://amigo.geneontology.org/amigo/term/GO:0008203	MSMEG_0603 MSMEG_1604 MSMEG_2891 MSMEG_3083 MSMEG_3524 MSMEG_5903 MSMEG_5906 MSMEG_5907 MSMEG_5918 MSMEG_5925 MSMEG_5993 MSMEG_5995 MSMEG_5996 MSMEG_6011 MSMEG_6036 MSMEG_6041 MSMEG_6512
0.0441101	12	24	2.50449	Sterol catabolic process	http://amigo.geneontology.org/amigo/term/GO:0016127	MSMEG_0603 MSMEG_3083 MSMEG_3524 MSMEG_5906 MSMEG_5907 MSMEG_5918 MSMEG_5993 MSMEG_5995 MSMEG_5996 MSMEG_6036 MSMEG_6041 MSMEG_6512
0.0441101	12	24	2.50449	Helix-turn-helix XRE-family like proteins	http://smart.embl-heidelberg.de/smart/do_annotation.pl?BLAST=DUMMY&DOMAIN=SM00530	MSMEG_0260 MSMEG_0523 MSMEG_0609 MSMEG_1289 MSMEG_1626 MSMEG_1631 MSMEG_2211 MSMEG_2428 MSMEG_3132 MSMEG_3525 MSMEG_5542 MSMEG_6794

## Sheet: WT01%glucose vs. MUT01%glucose
Supplementary Table
Gene Ontology (GO) enrichment with ShinyGo 0.80
Downexpressed under carbon starvation conditions
Enrichment FDR	nGenes	Pathway Genes	Fold Enrichment	Pathway	URL	Genes
0.000774807	2	6	278.833	Mixed, incl. dormancy process, and histidine kinase		MSMEG_6236 MSMEG_6238
0.000774807	2	5	334.6	Alcohol dehydrogenase, iron-type/glycerol dehydrogenase GldA	https://www.ebi.ac.uk/interpro/entry/InterPro/IPR001670	MSMEG_6239 MSMEG_6242
0.000774807	2	5	334.6	Iron-type alcohol dehydrogenase-like	https://www.ebi.ac.uk/interpro/entry/InterPro/IPR039697	MSMEG_6239 MSMEG_6242
0.000774807	2	5	334.6	Iron-containing alcohol dehydrogenase	http://pfam.xfam.org/family/PF00465	MSMEG_6239 MSMEG_6242
0.000774807	2	6	278.833	Iron-containing alcohol dehydrogenase	http://pfam.xfam.org/family/PF13685	MSMEG_6239 MSMEG_6242
0.00104122	3	56	44.8125	Mixed, incl. glycolysis / gluconeogenesis, and aldehyde dehydrogenase domain		MSMEG_1543 MSMEG_6239 MSMEG_6242
0.00212309	3	77	32.5909	Mixed, incl. aldehyde dehydrogenase domain, and amp-dependent synthetase/ligase		MSMEG_1543 MSMEG_6239 MSMEG_6242
0.00212309	2	12	139.417	Naphthalene degradation, and Flavin amine oxidase		MSMEG_6239 MSMEG_6242
0.00314828	3	96	26.1406	Mixed, incl. aldehyde dehydrogenase domain, and amp-binding enzyme		MSMEG_1543 MSMEG_6239 MSMEG_6242
0.00356659	2	18	92.9444	Histidine kinase, and Transcription regulator LuxR, C-terminal		MSMEG_6236 MSMEG_6238
0.00638373	2	25	66.92	Helix_turn_helix, lux regulon, and histidine kinase		MSMEG_6236 MSMEG_6238
0.0227697	2	49	34.1429	Intracellular signal transduction, and helix_turn_helix, lux regulon		MSMEG_6236 MSMEG_6238
0.0378439	4	569	5.88049	Oxidoreductase		MSMEG_0733 MSMEG_1543 MSMEG_6239 MSMEG_6242
0.0390317	1	3	278.833	Propanediol/glycerol dehydratase, small subunit	https://www.ebi.ac.uk/interpro/entry/InterPro/IPR003207	MSMEG_1546
0.0390317	1	3	278.833	Propanediol/glycerol dehydratase, small subunit superfamily	https://www.ebi.ac.uk/interpro/entry/InterPro/IPR036091	MSMEG_1546
0.0390317	1	3	278.833	Dehydratase small subunit	http://pfam.xfam.org/family/PF02287	MSMEG_1546

## Sheet: WT2%glucose vs. MUT2%glucose
Supplementary Table
Gene Ontology (GO) enrichment with ShinyGo 0.80
Downexpressed under carbon starvation conditions
Enrichment FDR	nGenes	Pathway Genes	Fold Enrichment	Pathway	URL	Genes
3.59679e-06	4	5	133.84	Cobalt ion transport, and cobalt ecf transporter t component cbiq		MSMEG_2607 MSMEG_2608 MSMEG_2609 MSMEG_2610
2.96961e-05	4	9	74.3556	Siderophore metabolic process	http://amigo.geneontology.org/amigo/term/GO:0009237	MSMEG_0016 MSMEG_2128 MSMEG_2132 MSMEG_4524
2.96961e-05	4	9	74.3556	Siderophore biosynthetic process	http://amigo.geneontology.org/amigo/term/GO:0019290	MSMEG_0016 MSMEG_2128 MSMEG_2132 MSMEG_4524
0.000138531	4	14	47.8	Mixed, incl. cobalt ion transport, and cobalt transport protein		MSMEG_2607 MSMEG_2608 MSMEG_2609 MSMEG_2610
0.000138531	4	14	47.8	Secondary metabolite biosynthetic process	http://amigo.geneontology.org/amigo/term/GO:0044550	MSMEG_0016 MSMEG_2128 MSMEG_2132 MSMEG_4524
0.000215882	3	5	100.38	Siderophore biosynthetic process from catechol	http://amigo.geneontology.org/amigo/term/GO:0019540	MSMEG_2128 MSMEG_2132 MSMEG_4524
0.000274487	5	40	20.9125	Transition metal ion transport	http://amigo.geneontology.org/amigo/term/GO:0000041	MSMEG_0012 MSMEG_2607 MSMEG_2608 MSMEG_2610 MSMEG_5418
0.000274487	4	18	37.1778	Nonribosomal peptide biosynthetic process	http://amigo.geneontology.org/amigo/term/GO:0019184	MSMEG_0016 MSMEG_2128 MSMEG_2132 MSMEG_4524
0.000286649	3	6	83.65	Cobalt ion transport	http://amigo.geneontology.org/amigo/term/GO:0006824	MSMEG_2607 MSMEG_2608 MSMEG_2610
0.000442516	6	80	12.5475	Metal ion transport	http://amigo.geneontology.org/amigo/term/GO:0030001	MSMEG_0012 MSMEG_2607 MSMEG_2608 MSMEG_2610 MSMEG_5418 MSMEG_6047
0.000535826	4	23	29.0957	Mixed, incl. biosynthesis of siderophore group nonribosomal peptides, and polyketide synthase, phosphopantetheine-binding domain		MSMEG_0014 MSMEG_0016 MSMEG_2128 MSMEG_4524
0.000823164	3	9	55.7667	Catechol-containing compound metabolic process	http://amigo.geneontology.org/amigo/term/GO:0009712	MSMEG_2128 MSMEG_2132 MSMEG_4524
0.000823164	3	9	55.7667	Transition metal ion transmembrane transporter activity	http://amigo.geneontology.org/amigo/term/GO:0046915	MSMEG_2607 MSMEG_2608 MSMEG_5418
0.00126423	4	30	22.3067	Mixed, incl. phosphopantetheine binding, and siderophore metabolic process		MSMEG_0014 MSMEG_0016 MSMEG_2128 MSMEG_4524
0.00184532	3	12	41.825	Phenol-containing compound metabolic process	http://amigo.geneontology.org/amigo/term/GO:0018958	MSMEG_2128 MSMEG_2132 MSMEG_4524
0.0019904	6	114	8.80526	Mixed, incl. tetrapyrrole biosynthetic process, and transition metal ion transport		MSMEG_0012 MSMEG_2607 MSMEG_2608 MSMEG_2609 MSMEG_2610 MSMEG_6047
0.0022993	4	37	18.0865	Secondary metabolic process	http://amigo.geneontology.org/amigo/term/GO:0019748	MSMEG_0016 MSMEG_2128 MSMEG_2132 MSMEG_4524
0.00277011	7	180	6.50611	Mixed, incl. tetrapyrrole biosynthetic process, and prosthetic group metabolic process		MSMEG_0012 MSMEG_2607 MSMEG_2608 MSMEG_2609 MSMEG_2610 MSMEG_3520 MSMEG_6047
0.00378926	5	82	10.2012	Mixed, incl. tetrapyrrole biosynthetic process, and abc transporter periplasmic binding domain		MSMEG_0012 MSMEG_2607 MSMEG_2608 MSMEG_2609 MSMEG_2610
0.00486186	6	139	7.22158	Cation transport	http://amigo.geneontology.org/amigo/term/GO:0006812	MSMEG_0012 MSMEG_2607 MSMEG_2608 MSMEG_2610 MSMEG_5418 MSMEG_6047
0.0062238	2	4	83.65	Cobalt ion transmembrane transporter activity	http://amigo.geneontology.org/amigo/term/GO:0015087	MSMEG_2607 MSMEG_2608
0.00808198	3	22	22.8136	Divalent inorganic cation transport	http://amigo.geneontology.org/amigo/term/GO:0072511	MSMEG_2607 MSMEG_2608 MSMEG_2610
0.00811937	2	5	66.92	Mixed, incl. polyketide synthase, thioesterase domain, and formyl transferase, c-terminal		MSMEG_0014 MSMEG_0016
0.00811937	4	55	12.1673	Tetrapyrrole biosynthetic process, and cobalt transport protein		MSMEG_2607 MSMEG_2608 MSMEG_2609 MSMEG_2610
0.00811937	2	5	66.92	Alcohol dehydrogenase, iron-type/glycerol dehydrogenase GldA	https://www.ebi.ac.uk/interpro/entry/InterPro/IPR001670	MSMEG_6239 MSMEG_6242
0.00811937	2	5	66.92	Iron-type alcohol dehydrogenase-like	https://www.ebi.ac.uk/interpro/entry/InterPro/IPR039697	MSMEG_6239 MSMEG_6242
0.00811937	2	5	66.92	Iron-containing alcohol dehydrogenase	http://pfam.xfam.org/family/PF00465	MSMEG_6239 MSMEG_6242
0.0106164	2	6	55.7667	Mixed, incl. dormancy process, and histidine kinase		MSMEG_6236 MSMEG_6238
0.0106164	4	63	10.6222	Mixed, incl. tetrapyrrole biosynthetic process, and cobalt transport protein		MSMEG_2607 MSMEG_2608 MSMEG_2609 MSMEG_2610
0.0106164	5	111	7.53604	Membrane protein complex	http://amigo.geneontology.org/amigo/term/GO:0098796	MSMEG_2607 MSMEG_2608 MSMEG_2610 MSMEG_5418 MSMEG_5483
0.0106164	2	6	55.7667	Iron-containing alcohol dehydrogenase	http://pfam.xfam.org/family/PF13685	MSMEG_6239 MSMEG_6242
0.0131615	2	7	47.8	Mixed, incl. nadh-azoreductase, fmn-dependent, and activator of hsp90 atpase homologue 1-like		MSMEG_6760 MSMEG_6762
0.0131615	4	69	9.69855	Transmembrane transporter complex	http://amigo.geneontology.org/amigo/term/GO:1902495	MSMEG_2607 MSMEG_2608 MSMEG_2610 MSMEG_5418
0.0131615	4	69	9.69855	Transporter complex	http://amigo.geneontology.org/amigo/term/GO:1990351	MSMEG_2607 MSMEG_2608 MSMEG_2610 MSMEG_5418
0.019702	8	362	3.69724	Ion transport	http://amigo.geneontology.org/amigo/term/GO:0006811	MSMEG_0012 MSMEG_2607 MSMEG_2608 MSMEG_2610 MSMEG_5368 MSMEG_5418 MSMEG_5483 MSMEG_6047
0.0250963	2	10	33.46	Reactive oxygen species metabolic process		MSMEG_3708 MSMEG_6636
0.0262909	4	86	7.7814	Plasma membrane protein complex	http://amigo.geneontology.org/amigo/term/GO:0098797	MSMEG_2607 MSMEG_2608 MSMEG_2610 MSMEG_5418
0.0332096	2	12	27.8833	Naphthalene degradation, and Flavin amine oxidase		MSMEG_6239 MSMEG_6242
0.0332096	3	44	11.4068	Metal ion transmembrane transporter activity	http://amigo.geneontology.org/amigo/term/GO:0046873	MSMEG_2607 MSMEG_2608 MSMEG_5418
0.0332096	2	12	27.8833	Xylose isomerase-like TIM barrel	http://pfam.xfam.org/family/PF01261	MSMEG_2005 MSMEG_6021
0.0382307	2	13	25.7385	Xylose isomerase-like, TIM barrel domain	https://www.ebi.ac.uk/interpro/entry/InterPro/IPR013022	MSMEG_2005 MSMEG_6021
0.0425434	2	14	23.9	Mixed, incl. ycii-related, and helix_turn_helix, arsenical resistance operon repressor		MSMEG_6760 MSMEG_6762
0.0425434	2	14	23.9	Xylose isomerase-like superfamily	https://www.ebi.ac.uk/interpro/entry/InterPro/IPR036237	MSMEG_2005 MSMEG_6021
0.0480903	3	52	9.65192	Cellular oxidant detoxification	http://amigo.geneontology.org/amigo/term/GO:0098869	MSMEG_3708 MSMEG_6536 MSMEG_6636
Overexpressed under carbone starvation
8.148e-18	20	25	14.0147	Mixed, incl. universal stress protein a family, and nitroreductase-like		MSMEG_3936 MSMEG_3937 MSMEG_3939 MSMEG_3940 MSMEG_3942 MSMEG_3943 MSMEG_3945 MSMEG_3946 MSMEG_3948 MSMEG_3947 MSMEG_3949 MSMEG_3950 MSMEG_3952 MSMEG_3955 MSMEG_5241 MSMEG_5242 MSMEG_5243 MSMEG_5244 MSMEG_5245 MSMEG_5246
1.70623e-16	32	82	6.83642	Mixed, incl. response to hypoxia, and biosynthesis of unsaturated fatty acids		MSMEG_1170 MSMEG_1742 MSMEG_1743 MSMEG_1885 MSMEG_1886 MSMEG_3933 MSMEG_3936 MSMEG_3937 MSMEG_3939 MSMEG_3940 MSMEG_3942 MSMEG_3943 MSMEG_3945 MSMEG_3946 MSMEG_3948 MSMEG_3947 MSMEG_3949 MSMEG_3950 MSMEG_3952 MSMEG_3955 MSMEG_5241 MSMEG_5242 MSMEG_5243 MSMEG_5244 MSMEG_5245 MSMEG_5246 MSMEG_5773 MSMEG_6322 MSMEG_6675 MSMEG_6676 MSMEG_6678 MSMEG_6836
3.71665e-15	16	19	14.7523	Mixed, incl. nitroreductase-like, and response to hypoxia		MSMEG_3942 MSMEG_3943 MSMEG_3945 MSMEG_3946 MSMEG_3948 MSMEG_3947 MSMEG_3949 MSMEG_3950 MSMEG_3952 MSMEG_3955 MSMEG_5241 MSMEG_5242 MSMEG_5243 MSMEG_5244 MSMEG_5245 MSMEG_5246
8.74142e-13	17	27	11.0301	Mostly uncharacterized, incl. s4 domain, and cellular response to acidic ph		MSMEG_1778 MSMEG_1779 MSMEG_1780 MSMEG_1781 MSMEG_1782 MSMEG_1787 MSMEG_2376 MSMEG_3311 MSMEG_3312 MSMEG_6606 MSMEG_6607 MSMEG_6608 MSMEG_6610 MSMEG_6612 MSMEG_6614 MSMEG_6615 MSMEG_6616
1.94493e-11	17	31	9.60682	Mostly uncharacterized, incl. carotenoid biosynthetic process, and stas domain		MSMEG_1786 MSMEG_1801 MSMEG_1802 MSMEG_1803 MSMEG_1804 MSMEG_1806 MSMEG_2341 MSMEG_2343 MSMEG_2344 MSMEG_2346 MSMEG_2347 MSMEG_5400 MSMEG_5401 MSMEG_5402 MSMEG_5540 MSMEG_5542 MSMEG_5543
1.20962e-09	18	43	7.33325	Mostly uncharacterized, incl. atpase family associated with various cellular activities (aaa), and von willebrand factor type a domain		MSMEG_1778 MSMEG_1779 MSMEG_1780 MSMEG_1781 MSMEG_1782 MSMEG_1787 MSMEG_1793 MSMEG_2376 MSMEG_3311 MSMEG_3312 MSMEG_6606 MSMEG_6607 MSMEG_6608 MSMEG_6610 MSMEG_6612 MSMEG_6614 MSMEG_6615 MSMEG_6616
1.41049e-09	19	49	6.79282	Mostly uncharacterized, incl. carotenoid biosynthetic process, and o-methyltransferase		MSMEG_1786 MSMEG_1801 MSMEG_1802 MSMEG_1803 MSMEG_1804 MSMEG_1806 MSMEG_2342 MSMEG_2341 MSMEG_2343 MSMEG_2344 MSMEG_2346 MSMEG_2347 MSMEG_3083 MSMEG_5400 MSMEG_5401 MSMEG_5402 MSMEG_5540 MSMEG_5542 MSMEG_5543
7.69607e-09	12	19	11.0642	Mostly uncharacterized, incl. stas domain, and chab		MSMEG_1786 MSMEG_1801 MSMEG_1802 MSMEG_1803 MSMEG_1804 MSMEG_1806 MSMEG_5400 MSMEG_5401 MSMEG_5402 MSMEG_5540 MSMEG_5542 MSMEG_5543
7.85269e-07	8	10	14.0147	Alpha amylase, catalytic domain		MSMEG_3184 MSMEG_3186 MSMEG_3673 MSMEG_4916 MSMEG_4918 MSMEG_6507 MSMEG_6514 MSMEG_6515
7.85269e-07	8	10	14.0147	Response to carbohydrate, and putative sugar-binding domain		MSMEG_3265 MSMEG_3266 MSMEG_3267 MSMEG_3268 MSMEG_3269 MSMEG_3270 MSMEG_3271 MSMEG_3272
8.98506e-07	14	37	6.62856	Response to decreased oxygen levels	http://amigo.geneontology.org/amigo/term/GO:0036293	MSMEG_1804 MSMEG_2752 MSMEG_3932 MSMEG_3933 MSMEG_3940 MSMEG_3944 MSMEG_3945 MSMEG_3948 MSMEG_3950 MSMEG_5242 MSMEG_5244 MSMEG_5245 MSMEG_5733 MSMEG_6322
8.98506e-07	14	37	6.62856	Response to oxygen levels	http://amigo.geneontology.org/amigo/term/GO:0070482	MSMEG_1804 MSMEG_2752 MSMEG_3932 MSMEG_3933 MSMEG_3940 MSMEG_3944 MSMEG_3945 MSMEG_3948 MSMEG_3950 MSMEG_5242 MSMEG_5244 MSMEG_5245 MSMEG_5733 MSMEG_6322
1.07381e-06	13	32	7.11682	Response to hypoxia	http://amigo.geneontology.org/amigo/term/GO:0001666	MSMEG_2752 MSMEG_3932 MSMEG_3933 MSMEG_3940 MSMEG_3944 MSMEG_3945 MSMEG_3948 MSMEG_3950 MSMEG_5242 MSMEG_5244 MSMEG_5245 MSMEG_5733 MSMEG_6322
1.27962e-06	9	14	11.2618	Mixed, incl. stas domain, and chab		MSMEG_1786 MSMEG_1801 MSMEG_1802 MSMEG_1803 MSMEG_1804 MSMEG_1806 MSMEG_5400 MSMEG_5401 MSMEG_5402
1.66459e-06	14	39	6.28863	Carbohydrate metabolism		MSMEG_0313 MSMEG_0314 MSMEG_3265 MSMEG_3271 MSMEG_3272 MSMEG_3673 MSMEG_4916 MSMEG_4918 MSMEG_5078 MSMEG_6514 MSMEG_6515 MSMEG_6752 MSMEG_6785 MSMEG_6787
2.71882e-06	9	15	10.511	Glycogen metabolic process, and alpha-glucan catabolic process		MSMEG_3184 MSMEG_3186 MSMEG_3673 MSMEG_4916 MSMEG_4918 MSMEG_5078 MSMEG_6507 MSMEG_6514 MSMEG_6515
7.34977e-06	11	26	7.4116	Cellular glucan metabolic process	http://amigo.geneontology.org/amigo/term/GO:0006073	MSMEG_3184 MSMEG_3186 MSMEG_3673 MSMEG_4916 MSMEG_4918 MSMEG_5078 MSMEG_6354 MSMEG_6507 MSMEG_6514 MSMEG_6515 MSMEG_6752
7.34977e-06	11	26	7.4116	Glucan metabolic process	http://amigo.geneontology.org/amigo/term/GO:0044042	MSMEG_3184 MSMEG_3186 MSMEG_3673 MSMEG_4916 MSMEG_4918 MSMEG_5078 MSMEG_6354 MSMEG_6507 MSMEG_6514 MSMEG_6515 MSMEG_6752
1.08953e-05	8	13	10.7805	Universal stress protein A family	https://www.ebi.ac.uk/interpro/entry/InterPro/IPR006015	MSMEG_3936 MSMEG_3939 MSMEG_3940 MSMEG_3945 MSMEG_3950 MSMEG_5245 MSMEG_5474 MSMEG_5733
1.13474e-05	10	22	7.96287	Starch and sucrose metabolism		MSMEG_3184 MSMEG_3186 MSMEG_3673 MSMEG_3954 MSMEG_4916 MSMEG_4918 MSMEG_5078 MSMEG_6507 MSMEG_6514 MSMEG_6515
2.12227e-05	6	7	15.0157	Mixed, incl. zeta toxin, and tagatose/fructose phosphokinase		MSMEG_3942 MSMEG_3943 MSMEG_3947 MSMEG_3949 MSMEG_3950 MSMEG_3952
4.15441e-05	5	5	17.5183	Mixed, incl. nramp family, and sporulation		MSMEG_1778 MSMEG_1779 MSMEG_1780 MSMEG_1781 MSMEG_1782
4.15441e-05	5	5	17.5183	Oxidoreductase activity, acting on hydrogen as donor, nad or nadp as acceptor, and 4fe-4s dicluster domain		MSMEG_3927 MSMEG_3928 MSMEG_3929 MSMEG_3930 MSMEG_3931
4.15441e-05	5	5	17.5183	Response to arsenic-containing substance, and arsr-type transcription regulator, hth motif		MSMEG_1171 MSMEG_1172 MSMEG_1173 MSMEG_1174 MSMEG_1175
4.15441e-05	5	5	17.5183	Mixed, incl. dormancy process, and pyridoxamine 5-phosphate oxidase-related		MSMEG_5242 MSMEG_5243 MSMEG_5244 MSMEG_5245 MSMEG_5246
4.15441e-05	5	5	17.5183	Glycogen metabolism		MSMEG_3673 MSMEG_4916 MSMEG_4918 MSMEG_6514 MSMEG_6515
4.15441e-05	5	5	17.5183	Mixed, incl. cysa, c-terminal regulatory domain, and glycerol-3-phosphate transmembrane transporter activity		MSMEG_3266 MSMEG_3267 MSMEG_3268 MSMEG_3269 MSMEG_3270
4.15441e-05	5	5	17.5183	Glycosyl hydrolase, all-beta	https://www.ebi.ac.uk/interpro/entry/InterPro/IPR013780	MSMEG_3186 MSMEG_4916 MSMEG_4918 MSMEG_6507 MSMEG_6515
4.15441e-05	5	5	17.5183	Glycogen biosynthesis		MSMEG_4916 MSMEG_4918 MSMEG_5078 MSMEG_6514 MSMEG_6515
5.61129e-05	6	8	13.1387	Glycosyl hydrolase, family 13, catalytic domain	https://www.ebi.ac.uk/interpro/entry/InterPro/IPR006047	MSMEG_3184 MSMEG_3186 MSMEG_4916 MSMEG_4918 MSMEG_6507 MSMEG_6515
5.61129e-05	6	8	13.1387	Immunoglobulin-like fold	https://www.ebi.ac.uk/interpro/entry/InterPro/IPR013783	MSMEG_1361 MSMEG_3184 MSMEG_3186 MSMEG_4916 MSMEG_4918 MSMEG_6507
9.65617e-05	8	17	8.24392	Glycogen metabolic process	http://amigo.geneontology.org/amigo/term/GO:0005977	MSMEG_3186 MSMEG_3673 MSMEG_4916 MSMEG_4918 MSMEG_5078 MSMEG_6507 MSMEG_6514 MSMEG_6515
9.65617e-05	8	17	8.24392	Energy reserve metabolic process	http://amigo.geneontology.org/amigo/term/GO:0006112	MSMEG_3186 MSMEG_3673 MSMEG_4916 MSMEG_4918 MSMEG_5078 MSMEG_6507 MSMEG_6514 MSMEG_6515
9.65617e-05	8	17	8.24392	UspA	https://www.ebi.ac.uk/interpro/entry/InterPro/IPR006016	MSMEG_3936 MSMEG_3939 MSMEG_3940 MSMEG_3945 MSMEG_3950 MSMEG_5245 MSMEG_5474 MSMEG_5733
9.65617e-05	8	17	8.24392	Universal stress protein family	http://pfam.xfam.org/family/PF00582	MSMEG_3936 MSMEG_3939 MSMEG_3940 MSMEG_3945 MSMEG_3950 MSMEG_5245 MSMEG_5474 MSMEG_5733
0.000179485	5	6	14.5986	Mixed, incl. atpase, aaa-3, and domain of unknown function duf58		MSMEG_6606 MSMEG_6607 MSMEG_6608 MSMEG_6610 MSMEG_6612
0.000179485	5	6	14.5986	Biosynthesis of unsaturated fatty acids		MSMEG_1742 MSMEG_1743 MSMEG_1885 MSMEG_1886 MSMEG_6836
0.000179485	5	6	14.5986	Mixed, incl. chab, and response to anoxia		MSMEG_1801 MSMEG_1802 MSMEG_1803 MSMEG_1804 MSMEG_1806
0.000179485	5	6	14.5986	Oxidoreductase activity, acting on diphenols and related substances as donors	http://amigo.geneontology.org/amigo/term/GO:0016679	MSMEG_0637 MSMEG_3232 MSMEG_3233 MSMEG_5605 MSMEG_5606
0.000181959	10	30	5.83944	Mostly uncharacterized, incl. bacterial chemotaxis, and stas domain superfamily		MSMEG_1766 MSMEG_1767 MSMEG_1768 MSMEG_1769 MSMEG_1771 MSMEG_1772 MSMEG_1773 MSMEG_2112 MSMEG_2115 MSMEG_5551
0.000292092	6	10	10.511	Arginine biosynthesis		MSMEG_3771 MSMEG_3772 MSMEG_3773 MSMEG_3774 MSMEG_3775 MSMEG_3776
0.00031251	17	87	3.42312	Response to abiotic stimulus	http://amigo.geneontology.org/amigo/term/GO:0009628	MSMEG_0267 MSMEG_1804 MSMEG_2694 MSMEG_2752 MSMEG_3582 MSMEG_3932 MSMEG_3933 MSMEG_3940 MSMEG_3944 MSMEG_3945 MSMEG_3948 MSMEG_3950 MSMEG_5242 MSMEG_5244 MSMEG_5245 MSMEG_5733 MSMEG_6322
0.000510031	4	4	17.5183	Oxidoreductase activity, acting on diphenols and related substances as donors, oxygen as acceptor	http://amigo.geneontology.org/amigo/term/GO:0016682	MSMEG_3232 MSMEG_3233 MSMEG_5605 MSMEG_5606
0.000905409	16	85	3.29757	Mixed, incl. meti-like superfamily, and bacterial extracellular solute-binding protein		MSMEG_0519 MSMEG_3265 MSMEG_3266 MSMEG_3267 MSMEG_3268 MSMEG_3269 MSMEG_3270 MSMEG_3271 MSMEG_3272 MSMEG_5571 MSMEG_5572 MSMEG_5574 MSMEG_6663 MSMEG_6665 MSMEG_6666 MSMEG_6667
0.000964493	12	51	4.12196	Mixed, incl. carbohydrate transport, and glycerol-3-phosphate transmembrane transporter activity		MSMEG_0519 MSMEG_3265 MSMEG_3266 MSMEG_3267 MSMEG_3268 MSMEG_3269 MSMEG_3270 MSMEG_3271 MSMEG_3272 MSMEG_5571 MSMEG_5572 MSMEG_5574
0.000995076	7	17	7.21343	Glycoside hydrolase superfamily	https://www.ebi.ac.uk/interpro/entry/InterPro/IPR017853	MSMEG_3184 MSMEG_3186 MSMEG_3673 MSMEG_4916 MSMEG_4918 MSMEG_6507 MSMEG_6515
0.0010138	6	12	8.75916	Polysaccharide catabolic process	http://amigo.geneontology.org/amigo/term/GO:0000272	MSMEG_3184 MSMEG_3186 MSMEG_6354 MSMEG_6507 MSMEG_6515 MSMEG_6752
0.00109449	11	44	4.37958	Mixed, incl. maltose transmembrane transporter activity, and glycerol-3-phosphate transmembrane transporter activity		MSMEG_3265 MSMEG_3266 MSMEG_3267 MSMEG_3268 MSMEG_3269 MSMEG_3270 MSMEG_3271 MSMEG_3272 MSMEG_5571 MSMEG_5572 MSMEG_5574
0.00122285	5	8	10.949	Mixed, incl. protein of unknown function duf4383, and alcohol dehydrogenase (nad+) activity		MSMEG_0669 MSMEG_0671 MSMEG_0672 MSMEG_1774 MSMEG_1775
0.00160832	9	31	5.08597	Alditol metabolic process	http://amigo.geneontology.org/amigo/term/GO:0019400	MSMEG_2122 MSMEG_3271 MSMEG_3933 MSMEG_3948 MSMEG_5242 MSMEG_5576 MSMEG_6322 MSMEG_6423 MSMEG_6466
0.00195489	4	5	14.0147	Mixed, incl. nadph-dependent fmn reductase-like		MSMEG_1766 MSMEG_1767 MSMEG_1768 MSMEG_1769
0.00195489	9	32	4.92703	Mixed, incl. glycine betaine transport, and cation/h+ exchanger, cpa1 family		MSMEG_0763 MSMEG_1755 MSMEG_1757 MSMEG_1758 MSMEG_1761 MSMEG_2924 MSMEG_2925 MSMEG_2926 MSMEG_2927
0.00195489	4	5	14.0147	Mixed, incl. regeneration, and dead/h associated		MSMEG_1755 MSMEG_1757 MSMEG_1758 MSMEG_1761
0.00195489	4	5	14.0147	Carotenoid biosynthesis, and plastid envelope		MSMEG_2343 MSMEG_2344 MSMEG_2346 MSMEG_2347
0.00195489	4	5	14.0147	Amine oxidase	https://www.ebi.ac.uk/interpro/entry/InterPro/IPR002937	MSMEG_2035 MSMEG_2344 MSMEG_2347 MSMEG_5400
0.00233125	5	9	9.7324	Ferritin-like	https://www.ebi.ac.uk/interpro/entry/InterPro/IPR012347	MSMEG_3419 MSMEG_3564 MSMEG_6213 MSMEG_6422 MSMEG_6467
0.00247454	9	33	4.77772	Hydrolase activity, hydrolyzing o-glycosyl compounds	http://amigo.geneontology.org/amigo/term/GO:0004553	MSMEG_1361 MSMEG_3184 MSMEG_3186 MSMEG_3954 MSMEG_4916 MSMEG_4918 MSMEG_6507 MSMEG_6515 MSMEG_6752
0.00423512	5	10	8.75916	Glucan catabolic process	http://amigo.geneontology.org/amigo/term/GO:0009251	MSMEG_3184 MSMEG_3186 MSMEG_6354 MSMEG_6507 MSMEG_6752
0.00423512	5	10	8.75916	Cellular polysaccharide catabolic process	http://amigo.geneontology.org/amigo/term/GO:0044247	MSMEG_3184 MSMEG_3186 MSMEG_6354 MSMEG_6507 MSMEG_6752
0.00423512	22	162	2.37903	Cellular carbohydrate metabolic process	http://amigo.geneontology.org/amigo/term/GO:0044262	MSMEG_2122 MSMEG_3184 MSMEG_3186 MSMEG_3271 MSMEG_3673 MSMEG_3933 MSMEG_3948 MSMEG_3947 MSMEG_3954 MSMEG_4916 MSMEG_4918 MSMEG_5078 MSMEG_5242 MSMEG_5576 MSMEG_6322 MSMEG_6354 MSMEG_6423 MSMEG_6466 MSMEG_6507 MSMEG_6514 MSMEG_6515 MSMEG_6752
0.00481365	4	6	11.6789	Mixed, incl. tryptophan halogenase, and sodium/solute symporter superfamily		MSMEG_6765 MSMEG_6766 MSMEG_6768 MSMEG_6769
0.00481365	4	6	11.6789	Universal stress protein A family, and Tetratricopeptide repeat		MSMEG_3936 MSMEG_3937 MSMEG_3939 MSMEG_3940
0.00481365	10	44	3.98144	Growth of symbiont in host cell	http://amigo.geneontology.org/amigo/term/GO:0044119	MSMEG_0267 MSMEG_2694 MSMEG_3417 MSMEG_3932 MSMEG_3933 MSMEG_3948 MSMEG_5242 MSMEG_5401 MSMEG_6210 MSMEG_6322
0.00481365	4	6	11.6789	Immunoglobulin E-set	https://www.ebi.ac.uk/interpro/entry/InterPro/IPR014756	MSMEG_3184 MSMEG_3186 MSMEG_4918 MSMEG_6507
0.00493704	7	22	5.57401	Mixed, incl. oxidoreductase activity, acting on paired donors, with oxidation of a pair of donors resulting in the reduction of molecular oxygen to two molecules of water, and triglyceride biosynthetic process		MSMEG_1742 MSMEG_1743 MSMEG_1885 MSMEG_1886 MSMEG_3933 MSMEG_6322 MSMEG_6836
0.00493704	7	22	5.57401	Carbohydrate utilization	http://amigo.geneontology.org/amigo/term/GO:0009758	MSMEG_3265 MSMEG_3266 MSMEG_3271 MSMEG_3272 MSMEG_5574 MSMEG_6785 MSMEG_6787
0.00502202	8	29	4.83264	Glycerol metabolic process	http://amigo.geneontology.org/amigo/term/GO:0006071	MSMEG_2122 MSMEG_3271 MSMEG_3933 MSMEG_3948 MSMEG_5242 MSMEG_6322 MSMEG_6423 MSMEG_6466
0.00519934	6	16	6.56937	Ferritin-like superfamily	https://www.ebi.ac.uk/interpro/entry/InterPro/IPR009078	MSMEG_3419 MSMEG_3564 MSMEG_5773 MSMEG_6213 MSMEG_6422 MSMEG_6467
0.0054454	3	3	17.5183	Glycogen debranching enzyme activity	http://amigo.geneontology.org/amigo/term/GO:0004133	MSMEG_3186 MSMEG_3673 MSMEG_6507
0.0054454	9	37	4.26121	Response to inorganic substance	http://amigo.geneontology.org/amigo/term/GO:0010035	MSMEG_1174 MSMEG_3460 MSMEG_3932 MSMEG_3933 MSMEG_3948 MSMEG_5015 MSMEG_5242 MSMEG_5603 MSMEG_6322
0.0054454	3	3	17.5183	Dormancy process	http://amigo.geneontology.org/amigo/term/GO:0022611	MSMEG_2694 MSMEG_3944 MSMEG_5244
0.0054454	3	3	17.5183	Glycoside hydrolase, family 13, N-terminal	https://www.ebi.ac.uk/interpro/entry/InterPro/IPR004193	MSMEG_3186 MSMEG_4918 MSMEG_6507
0.0054454	3	3	17.5183	Iron storage		MSMEG_3564 MSMEG_6422 MSMEG_6467
0.0054454	3	3	17.5183	Carbohydrate-binding module 48 (Isoamylase N-terminal domain)	http://pfam.xfam.org/family/PF02922	MSMEG_3186 MSMEG_4918 MSMEG_6507
0.00589627	5	11	7.96287	Response to metal ion	http://amigo.geneontology.org/amigo/term/GO:0010038	MSMEG_1174 MSMEG_3460 MSMEG_3932 MSMEG_5015 MSMEG_5603
0.00683195	6	17	6.18294	Arginine biosynthetic process	http://amigo.geneontology.org/amigo/term/GO:0006526	MSMEG_3771 MSMEG_3772 MSMEG_3773 MSMEG_3774 MSMEG_3775 MSMEG_3776
0.00726578	8	31	4.52086	Mixed, incl. phosphate ion transport, and two-component regulatory system		MSMEG_0649 MSMEG_0650 MSMEG_0651 MSMEG_1064 MSMEG_1065 MSMEG_1066 MSMEG_1605 MSMEG_5782
0.0093006	5	12	7.2993	Mixed, incl. carotenoid biosynthesis, and trna methyl transferase		MSMEG_2341 MSMEG_2343 MSMEG_2344 MSMEG_2346 MSMEG_2347
0.0102581	16	108	2.59531	Mostly uncharacterized, incl. positive regulation of rna metabolic process, and glyoxalase/bleomycin resistance protein/dioxygenase superfamily		MSMEG_1001 MSMEG_1766 MSMEG_1767 MSMEG_1768 MSMEG_1769 MSMEG_1771 MSMEG_1772 MSMEG_1773 MSMEG_2112 MSMEG_2115 MSMEG_3290 MSMEG_5013 MSMEG_5342 MSMEG_5343 MSMEG_5551 MSMEG_6752
0.0130449	5	13	6.73782	Glycogen biosynthetic process	http://amigo.geneontology.org/amigo/term/GO:0005978	MSMEG_4916 MSMEG_4918 MSMEG_5078 MSMEG_6514 MSMEG_6515
0.0130449	8	34	4.12196	Positive regulation of transcription, dna-templated	http://amigo.geneontology.org/amigo/term/GO:0045893	MSMEG_0586 MSMEG_1804 MSMEG_2694 MSMEG_2752 MSMEG_3290 MSMEG_3944 MSMEG_5244 MSMEG_5551
0.0130449	8	34	4.12196	Positive regulation of nucleobase-containing compound metabolic process	http://amigo.geneontology.org/amigo/term/GO:0045935	MSMEG_0586 MSMEG_1804 MSMEG_2694 MSMEG_2752 MSMEG_3290 MSMEG_3944 MSMEG_5244 MSMEG_5551
0.0130449	8	34	4.12196	Positive regulation of rna metabolic process	http://amigo.geneontology.org/amigo/term/GO:0051254	MSMEG_0586 MSMEG_1804 MSMEG_2694 MSMEG_2752 MSMEG_3290 MSMEG_3944 MSMEG_5244 MSMEG_5551
0.0130449	8	34	4.12196	Positive regulation of rna biosynthetic process	http://amigo.geneontology.org/amigo/term/GO:1902680	MSMEG_0586 MSMEG_1804 MSMEG_2694 MSMEG_2752 MSMEG_3290 MSMEG_3944 MSMEG_5244 MSMEG_5551
0.0130449	8	34	4.12196	Positive regulation of nucleic acid-templated transcription	http://amigo.geneontology.org/amigo/term/GO:1903508	MSMEG_0586 MSMEG_1804 MSMEG_2694 MSMEG_2752 MSMEG_3290 MSMEG_3944 MSMEG_5244 MSMEG_5551
0.0130449	9	42	3.75393	Rossmann-like alpha/beta/alpha sandwich fold	https://www.ebi.ac.uk/interpro/entry/InterPro/IPR014729	MSMEG_3936 MSMEG_3939 MSMEG_3940 MSMEG_3945 MSMEG_3950 MSMEG_5245 MSMEG_5474 MSMEG_5733 MSMEG_6306
0.0130449	5	13	6.73782	Flavin containing amine oxidoreductase	http://pfam.xfam.org/family/PF01593	MSMEG_2035 MSMEG_1030 MSMEG_2344 MSMEG_2347 MSMEG_5400
0.0135944	9	43	3.66663	Mixed, incl. biosynthesis of unsaturated fatty acids, and triglyceride biosynthetic process		MSMEG_1170 MSMEG_1742 MSMEG_1743 MSMEG_1885 MSMEG_1886 MSMEG_3933 MSMEG_5773 MSMEG_6322 MSMEG_6836
0.0135944	4	8	8.75916	Mixed, incl. stas domain, and transposase is204/is1001/is1096/is1165, dde domain		MSMEG_1786 MSMEG_5400 MSMEG_5401 MSMEG_5402
0.0135944	4	8	8.75916	Tetraterpenoid biosynthetic process	http://amigo.geneontology.org/amigo/term/GO:0016109	MSMEG_2344 MSMEG_2346 MSMEG_2347 MSMEG_5400
0.0135944	4	8	8.75916	Carotenoid biosynthetic process	http://amigo.geneontology.org/amigo/term/GO:0016117	MSMEG_2344 MSMEG_2346 MSMEG_2347 MSMEG_5400
0.0135944	4	8	8.75916	Triglyceride biosynthetic process	http://amigo.geneontology.org/amigo/term/GO:0019432	MSMEG_3933 MSMEG_3948 MSMEG_5242 MSMEG_6322
0.0135944	4	8	8.75916	Neutral lipid biosynthetic process	http://amigo.geneontology.org/amigo/term/GO:0046460	MSMEG_3933 MSMEG_3948 MSMEG_5242 MSMEG_6322
0.0135944	4	8	8.75916	Acylglycerol biosynthetic process	http://amigo.geneontology.org/amigo/term/GO:0046463	MSMEG_3933 MSMEG_3948 MSMEG_5242 MSMEG_6322
0.0135944	4	8	8.75916	Long-chain-alcohol o-fatty-acyltransferase activity	http://amigo.geneontology.org/amigo/term/GO:0047196	MSMEG_3933 MSMEG_3948 MSMEG_5242 MSMEG_6322
0.0135944	4	8	8.75916	O-acyltransferase, WSD1, N-terminal	https://www.ebi.ac.uk/interpro/entry/InterPro/IPR004255	MSMEG_3933 MSMEG_3948 MSMEG_5242 MSMEG_6322
0.0135944	4	8	8.75916	O-acyltransferase WSD1, C-terminal	https://www.ebi.ac.uk/interpro/entry/InterPro/IPR009721	MSMEG_3933 MSMEG_3948 MSMEG_5242 MSMEG_6322
0.0135944	4	8	8.75916	Wax ester synthase-like Acyl-CoA acyltransferase domain	http://pfam.xfam.org/family/PF03007	MSMEG_3933 MSMEG_3948 MSMEG_5242 MSMEG_6322
0.0135944	4	8	8.75916	Protein of unknown function (DUF1298)	http://pfam.xfam.org/family/PF06974	MSMEG_3933 MSMEG_3948 MSMEG_5242 MSMEG_6322
0.0152192	3	4	13.1387	Ferritin/DPS protein domain	https://www.ebi.ac.uk/interpro/entry/InterPro/IPR008331	MSMEG_3564 MSMEG_6422 MSMEG_6467
0.0152192	3	4	13.1387	Haemerythrin-like	https://www.ebi.ac.uk/interpro/entry/InterPro/IPR012312	MSMEG_2415 MSMEG_3312 MSMEG_6212
0.0152192	3	4	13.1387	Ferritin-like domain	http://pfam.xfam.org/family/PF00210	MSMEG_3564 MSMEG_6422 MSMEG_6467
0.0152192	3	4	13.1387	Hemerythrin HHE cation binding domain	http://pfam.xfam.org/family/PF01814	MSMEG_2415 MSMEG_3312 MSMEG_6212
0.0158768	5	14	6.25654	Oxidoreductase activity, acting on paired donors, with oxidation of a pair of donors resulting in the reduction of molecular oxygen to two molecules of water, and nadph binding		MSMEG_1742 MSMEG_1743 MSMEG_1885 MSMEG_1886 MSMEG_6836
0.0158768	7	28	4.37958	Mostly uncharacterized, incl. d-serine metabolic process, and d-aminoacylase, insert domain superfamily		MSMEG_2914 MSMEG_3417 MSMEG_3418 MSMEG_3419 MSMEG_3420 MSMEG_6177 MSMEG_6739
0.0158768	5	14	6.25654	Glucan biosynthetic process	http://amigo.geneontology.org/amigo/term/GO:0009250	MSMEG_4916 MSMEG_4918 MSMEG_5078 MSMEG_6514 MSMEG_6515
0.0158768	8	36	3.89296	Positive regulation of biosynthetic process	http://amigo.geneontology.org/amigo/term/GO:0009891	MSMEG_0586 MSMEG_1804 MSMEG_2694 MSMEG_2752 MSMEG_3290 MSMEG_3944 MSMEG_5244 MSMEG_5551
0.0158768	8	36	3.89296	Positive regulation of macromolecule biosynthetic process	http://amigo.geneontology.org/amigo/term/GO:0010557	MSMEG_0586 MSMEG_1804 MSMEG_2694 MSMEG_2752 MSMEG_3290 MSMEG_3944 MSMEG_5244 MSMEG_5551
0.0158768	8	36	3.89296	Positive regulation of cellular biosynthetic process	http://amigo.geneontology.org/amigo/term/GO:0031328	MSMEG_0586 MSMEG_1804 MSMEG_2694 MSMEG_2752 MSMEG_3290 MSMEG_3944 MSMEG_5244 MSMEG_5551
0.0173748	13	84	2.71117	Mostly uncharacterized, incl. positive regulation of rna metabolic process, and bacterial chemotaxis		MSMEG_1001 MSMEG_1766 MSMEG_1767 MSMEG_1768 MSMEG_1769 MSMEG_1771 MSMEG_1772 MSMEG_1773 MSMEG_2112 MSMEG_2115 MSMEG_3290 MSMEG_5013 MSMEG_5551
0.0189898	10	55	3.18515	Hydrolase activity, acting on glycosyl bonds	http://amigo.geneontology.org/amigo/term/GO:0016798	MSMEG_0265 MSMEG_1361 MSMEG_3184 MSMEG_3186 MSMEG_3954 MSMEG_4916 MSMEG_4918 MSMEG_6507 MSMEG_6515 MSMEG_6752
0.0203315	4	9	7.78592	Neutral lipid metabolic process	http://amigo.geneontology.org/amigo/term/GO:0006638	MSMEG_3933 MSMEG_3948 MSMEG_5242 MSMEG_6322
0.0203315	4	9	7.78592	Acylglycerol metabolic process	http://amigo.geneontology.org/amigo/term/GO:0006639	MSMEG_3933 MSMEG_3948 MSMEG_5242 MSMEG_6322
0.0203315	4	9	7.78592	Triglyceride metabolic process	http://amigo.geneontology.org/amigo/term/GO:0006641	MSMEG_3933 MSMEG_3948 MSMEG_5242 MSMEG_6322
0.0203315	4	9	7.78592	Phosphate transport		MSMEG_0649 MSMEG_1064 MSMEG_1605 MSMEG_5782
0.0215375	6	22	4.77772	Arginine metabolic process	http://amigo.geneontology.org/amigo/term/GO:0006525	MSMEG_3771 MSMEG_3772 MSMEG_3773 MSMEG_3774 MSMEG_3775 MSMEG_3776
0.0215375	8	38	3.68807	Positive regulation of gene expression	http://amigo.geneontology.org/amigo/term/GO:0010628	MSMEG_0586 MSMEG_1804 MSMEG_2694 MSMEG_2752 MSMEG_3290 MSMEG_3944 MSMEG_5244 MSMEG_5551
0.0215375	11	66	2.91972	Growth	http://amigo.geneontology.org/amigo/term/GO:0040007	MSMEG_0267 MSMEG_1761 MSMEG_2694 MSMEG_3417 MSMEG_3932 MSMEG_3933 MSMEG_3948 MSMEG_5242 MSMEG_5401 MSMEG_6210 MSMEG_6322
0.0223048	23	203	1.98483	Generation of precursor metabolites and energy	http://amigo.geneontology.org/amigo/term/GO:0006091	MSMEG_0314 MSMEG_0637 MSMEG_0686 MSMEG_1112 MSMEG_1742 MSMEG_1885 MSMEG_2115 MSMEG_2837 MSMEG_3186 MSMEG_3232 MSMEG_3233 MSMEG_3673 MSMEG_3930 MSMEG_3947 MSMEG_4916 MSMEG_4918 MSMEG_5078 MSMEG_5605 MSMEG_5606 MSMEG_6507 MSMEG_6514 MSMEG_6515 MSMEG_6836
0.0270885	6	23	4.57	Response to carbohydrate	http://amigo.geneontology.org/amigo/term/GO:0009743	MSMEG_3265 MSMEG_3266 MSMEG_3271 MSMEG_3272 MSMEG_5574 MSMEG_6787
0.0270885	6	23	4.57	Cellular response to carbohydrate stimulus	http://amigo.geneontology.org/amigo/term/GO:0071322	MSMEG_3265 MSMEG_3266 MSMEG_3271 MSMEG_3272 MSMEG_5574 MSMEG_6787
0.0277012	5	16	5.47448	Mixed, incl. pa domain, and response to arsenic-containing substance		MSMEG_1171 MSMEG_1172 MSMEG_1173 MSMEG_1174 MSMEG_1175
0.0277012	3	5	10.511	Oxidoreductase activity, acting on diphenols and related substances as donors, oxygen as acceptor, and cysteine transport		MSMEG_3231 MSMEG_3232 MSMEG_3233
0.0277012	5	16	5.47448	Mixed, incl. cation/h+ exchanger, cpa1 family, and oxidized pyrimidine nucleobase lesion dna n-glycosylase activity		MSMEG_0763 MSMEG_1755 MSMEG_1757 MSMEG_1758 MSMEG_1761
0.0277012	3	5	10.511	NAD biosynthetic process		MSMEG_3199 MSMEG_3200 MSMEG_3201
0.0277012	3	5	10.511	Gluconate utilization, and gluconokinase activity		MSMEG_0312 MSMEG_0313 MSMEG_0314
0.0277012	3	5	10.511	Protein of unknown function DUF3349, and Phosphate transporter		MSMEG_1064 MSMEG_1065 MSMEG_1066
0.0277012	3	5	10.511	Mixed, incl. drug transport, and abc-2 transporter		MSMEG_6508 MSMEG_6511 MSMEG_6512
0.0277012	3	5	10.511	Heavy-metal-associated domain, and Domain of unknown function DUF305		MSMEG_5014 MSMEG_5015 MSMEG_5016
0.0277012	3	5	10.511	Probable membrane protein MT1774/Rv1733c-like, and tRNA threonylcarbamoyladenosine dehydratase		MSMEG_3945 MSMEG_3946 MSMEG_3948
0.0277012	3	5	10.511	Mixed, incl. cro/c1-type hth dna-binding domain, and fusaric acid resistance protein-like		MSMEG_5540 MSMEG_5542 MSMEG_5543
0.0277012	3	5	10.511	Mixed, incl. maltose transport, and putative sugar-binding domain		MSMEG_5571 MSMEG_5572 MSMEG_5574
0.0277012	4	10	7.00733	Mixed, incl. protein of unknown function duf4235, and predicted membrane protein (duf2243)		MSMEG_6663 MSMEG_6665 MSMEG_6666 MSMEG_6667
0.0277012	4	10	7.00733	Quaternary ammonium group transport	http://amigo.geneontology.org/amigo/term/GO:0015697	MSMEG_2924 MSMEG_2925 MSMEG_2926 MSMEG_2927
0.0277012	4	10	7.00733	Amino-acid betaine transport	http://amigo.geneontology.org/amigo/term/GO:0015838	MSMEG_2924 MSMEG_2925 MSMEG_2926 MSMEG_2927
0.0277012	4	10	7.00733	Glycine betaine transport	http://amigo.geneontology.org/amigo/term/GO:0031460	MSMEG_2924 MSMEG_2925 MSMEG_2926 MSMEG_2927
0.0277012	4	10	7.00733	Modified amino acid transport	http://amigo.geneontology.org/amigo/term/GO:0072337	MSMEG_2924 MSMEG_2925 MSMEG_2926 MSMEG_2927
0.0277012	9	49	3.21765	NAD(P)-binding Rossmann-like domain	http://pfam.xfam.org/family/PF13450	MSMEG_0637 MSMEG_0670 MSMEG_1132 MSMEG_2035 MSMEG_1030 MSMEG_2344 MSMEG_2347 MSMEG_3444 MSMEG_5400
0.028866	12	80	2.62775	Mixed, incl. starch and sucrose metabolism, and amino sugar and nucleotide sugar metabolism		MSMEG_1358 MSMEG_1361 MSMEG_3184 MSMEG_3186 MSMEG_3673 MSMEG_3954 MSMEG_4916 MSMEG_4918 MSMEG_5078 MSMEG_6507 MSMEG_6514 MSMEG_6515
0.0304056	8	41	3.41821	Positive regulation of cellular metabolic process	http://amigo.geneontology.org/amigo/term/GO:0031325	MSMEG_0586 MSMEG_1804 MSMEG_2694 MSMEG_2752 MSMEG_3290 MSMEG_3944 MSMEG_5244 MSMEG_5551
0.0304056	8	41	3.41821	Positive regulation of nitrogen compound metabolic process	http://amigo.geneontology.org/amigo/term/GO:0051173	MSMEG_0586 MSMEG_1804 MSMEG_2694 MSMEG_2752 MSMEG_3290 MSMEG_3944 MSMEG_5244 MSMEG_5551
0.03343	9	51	3.09147	Polyol metabolic process	http://amigo.geneontology.org/amigo/term/GO:0019751	MSMEG_2122 MSMEG_3271 MSMEG_3933 MSMEG_3948 MSMEG_5242 MSMEG_5576 MSMEG_6322 MSMEG_6423 MSMEG_6466
0.038312	4	11	6.3703	Glycine betaine transport, and putative glycolipid-binding		MSMEG_2924 MSMEG_2925 MSMEG_2926 MSMEG_2927
0.038312	12	83	2.53277	Carbohydrate catabolic process	http://amigo.geneontology.org/amigo/term/GO:0016052	MSMEG_3184 MSMEG_3186 MSMEG_3265 MSMEG_3271 MSMEG_3272 MSMEG_3947 MSMEG_6354 MSMEG_6507 MSMEG_6515 MSMEG_6752 MSMEG_6785 MSMEG_6787
0.038312	4	11	6.3703	Tetraterpenoid metabolic process	http://amigo.geneontology.org/amigo/term/GO:0016108	MSMEG_2344 MSMEG_2346 MSMEG_2347 MSMEG_5400
0.038312	4	11	6.3703	Carotenoid metabolic process	http://amigo.geneontology.org/amigo/term/GO:0016116	MSMEG_2344 MSMEG_2346 MSMEG_2347 MSMEG_5400
0.038312	4	11	6.3703	NADPH binding	http://amigo.geneontology.org/amigo/term/GO:0070402	MSMEG_1057 MSMEG_1742 MSMEG_1885 MSMEG_6836
0.038312	10	62	2.82554	Response to oxygen-containing compound	http://amigo.geneontology.org/amigo/term/GO:1901700	MSMEG_3265 MSMEG_3266 MSMEG_3271 MSMEG_3272 MSMEG_3933 MSMEG_3948 MSMEG_5242 MSMEG_5574 MSMEG_6322 MSMEG_6787
0.0396325	8	43	3.25922	Positive regulation of macromolecule metabolic process	http://amigo.geneontology.org/amigo/term/GO:0010604	MSMEG_0586 MSMEG_1804 MSMEG_2694 MSMEG_2752 MSMEG_3290 MSMEG_3944 MSMEG_5244 MSMEG_5551
0.0443785	11	74	2.60408	Cellular polysaccharide metabolic process	http://amigo.geneontology.org/amigo/term/GO:0044264	MSMEG_3184 MSMEG_3186 MSMEG_3673 MSMEG_4916 MSMEG_4918 MSMEG_5078 MSMEG_6354 MSMEG_6507 MSMEG_6514 MSMEG_6515 MSMEG_6752
0.0478209	3	6	8.75916	Mixed, incl. deglycase pfpi, and protein of unknown function duf5313		MSMEG_0534 MSMEG_0535 MSMEG_0536
0.0478209	3	6	8.75916	Mixed, incl. organic phosphonate transport, and phosphate/phosphite/phosphonate abc transporter, periplasmic binding protein		MSMEG_0649 MSMEG_0650 MSMEG_0651
0.0478209	3	6	8.75916	CO dehydrogenase flavoprotein C-terminal domain, and [2Fe-2S]-binding		MSMEG_0684 MSMEG_0685 MSMEG_0686
0.0478209	3	6	8.75916	Lycopene cyclase protein	http://pfam.xfam.org/family/PF05834	MSMEG_1132 MSMEG_3444 MSMEG_6768

## Sheet: WT2%prop. vs. MUT2%propanediol
Supplementary Table
Gene Ontology (GO) enrichment with ShinyGo 0.80
Downexpressed under carbon starvation conditions
Enrichment FDR	nGenes	Pathway Genes	Fold Enrichment	Pathway	URL	Genes
5.39732e-29	66	103	4.6158	Translation		MSMEG_1339 MSMEG_1346 MSMEG_1364 MSMEG_1365 MSMEG_1398 MSMEG_1399 MSMEG_1401 MSMEG_1435 MSMEG_1436 MSMEG_1437 MSMEG_1438 MSMEG_1439 MSMEG_1440 MSMEG_1441 MSMEG_1442 MSMEG_1443 MSMEG_1444 MSMEG_1445 MSMEG_1465 MSMEG_1466 MSMEG_1467 MSMEG_1468 MSMEG_1469 MSMEG_1519 MSMEG_1520 MSMEG_1521 MSMEG_1522 MSMEG_1523 MSMEG_1524 MSMEG_1525 MSMEG_1556 MSMEG_1557 MSMEG_2091 MSMEG_2435 MSMEG_2437 MSMEG_2440 MSM…
5.39732e-29	55	74	5.35391	Ribosome		MSMEG_1339 MSMEG_1346 MSMEG_1364 MSMEG_1365 MSMEG_1398 MSMEG_1399 MSMEG_1401 MSMEG_1435 MSMEG_1436 MSMEG_1437 MSMEG_1438 MSMEG_1439 MSMEG_1440 MSMEG_1441 MSMEG_1442 MSMEG_1443 MSMEG_1444 MSMEG_1445 MSMEG_1465 MSMEG_1466 MSMEG_1467 MSMEG_1468 MSMEG_1469 MSMEG_1519 MSMEG_1520 MSMEG_1521 MSMEG_1522 MSMEG_1523 MSMEG_1525 MSMEG_1556 MSMEG_1557 MSMEG_2091 MSMEG_2435 MSMEG_2437 MSMEG_2440 MSMEG_2519 MSM…
1.55801e-28	67	108	4.4688	Translation, and rna polymerase		MSMEG_1339 MSMEG_1346 MSMEG_1364 MSMEG_1365 MSMEG_1398 MSMEG_1399 MSMEG_1401 MSMEG_1435 MSMEG_1436 MSMEG_1437 MSMEG_1438 MSMEG_1439 MSMEG_1440 MSMEG_1441 MSMEG_1442 MSMEG_1443 MSMEG_1444 MSMEG_1445 MSMEG_1465 MSMEG_1466 MSMEG_1467 MSMEG_1468 MSMEG_1469 MSMEG_1519 MSMEG_1520 MSMEG_1521 MSMEG_1522 MSMEG_1523 MSMEG_1524 MSMEG_1525 MSMEG_1527 MSMEG_1556 MSMEG_1557 MSMEG_2091 MSMEG_2435 MSMEG_2437 MSM…
1.55801e-28	59	86	4.9419	Ribosome, and translation regulator activity		MSMEG_1339 MSMEG_1346 MSMEG_1364 MSMEG_1365 MSMEG_1398 MSMEG_1399 MSMEG_1401 MSMEG_1435 MSMEG_1436 MSMEG_1437 MSMEG_1438 MSMEG_1439 MSMEG_1440 MSMEG_1441 MSMEG_1442 MSMEG_1443 MSMEG_1444 MSMEG_1445 MSMEG_1465 MSMEG_1466 MSMEG_1467 MSMEG_1468 MSMEG_1469 MSMEG_1519 MSMEG_1520 MSMEG_1521 MSMEG_1522 MSMEG_1523 MSMEG_1524 MSMEG_1525 MSMEG_1556 MSMEG_1557 MSMEG_2091 MSMEG_2435 MSMEG_2437 MSMEG_2440 MSM…
1.55801e-28	51	66	5.5663	Structural constituent of ribosome		MSMEG_1339 MSMEG_1346 MSMEG_1364 MSMEG_1365 MSMEG_1398 MSMEG_1399 MSMEG_1401 MSMEG_1435 MSMEG_1436 MSMEG_1437 MSMEG_1438 MSMEG_1439 MSMEG_1440 MSMEG_1441 MSMEG_1442 MSMEG_1443 MSMEG_1444 MSMEG_1445 MSMEG_1465 MSMEG_1466 MSMEG_1467 MSMEG_1468 MSMEG_1469 MSMEG_1519 MSMEG_1520 MSMEG_1521 MSMEG_1522 MSMEG_1523 MSMEG_1525 MSMEG_1556 MSMEG_1557 MSMEG_2091 MSMEG_2435 MSMEG_2440 MSMEG_2519 MSMEG_2520 MSM…
5.87627e-28	69	116	4.28481	Translation, and rna processing		MSMEG_1339 MSMEG_1346 MSMEG_1364 MSMEG_1365 MSMEG_1398 MSMEG_1399 MSMEG_1401 MSMEG_1435 MSMEG_1436 MSMEG_1437 MSMEG_1438 MSMEG_1439 MSMEG_1440 MSMEG_1441 MSMEG_1442 MSMEG_1443 MSMEG_1444 MSMEG_1445 MSMEG_1465 MSMEG_1466 MSMEG_1467 MSMEG_1468 MSMEG_1469 MSMEG_1519 MSMEG_1520 MSMEG_1521 MSMEG_1522 MSMEG_1523 MSMEG_1524 MSMEG_1525 MSMEG_1527 MSMEG_1540 MSMEG_1556 MSMEG_1557 MSMEG_2091 MSMEG_2435 MSM…
1.34807e-27	74	133	4.00793	Translation, and protein export		MSMEG_1339 MSMEG_1346 MSMEG_1364 MSMEG_1365 MSMEG_1398 MSMEG_1399 MSMEG_1401 MSMEG_1435 MSMEG_1436 MSMEG_1437 MSMEG_1438 MSMEG_1439 MSMEG_1440 MSMEG_1441 MSMEG_1442 MSMEG_1443 MSMEG_1444 MSMEG_1445 MSMEG_1465 MSMEG_1466 MSMEG_1467 MSMEG_1468 MSMEG_1469 MSMEG_1519 MSMEG_1520 MSMEG_1521 MSMEG_1522 MSMEG_1523 MSMEG_1524 MSMEG_1525 MSMEG_1527 MSMEG_1540 MSMEG_1556 MSMEG_1557 MSMEG_1881 MSMEG_2091 MSM…
3.77684e-25	82	170	3.4746	Mixed, incl. translation, and protein export		MSMEG_0880 MSMEG_1339 MSMEG_1346 MSMEG_1364 MSMEG_1365 MSMEG_1398 MSMEG_1399 MSMEG_1401 MSMEG_1435 MSMEG_1436 MSMEG_1437 MSMEG_1438 MSMEG_1439 MSMEG_1440 MSMEG_1441 MSMEG_1442 MSMEG_1443 MSMEG_1444 MSMEG_1445 MSMEG_1465 MSMEG_1466 MSMEG_1467 MSMEG_1468 MSMEG_1469 MSMEG_1485 MSMEG_1519 MSMEG_1520 MSMEG_1521 MSMEG_1522 MSMEG_1523 MSMEG_1524 MSMEG_1525 MSMEG_1527 MSMEG_1540 MSMEG_1556 MSMEG_1557 MSM…
3.4111e-24	44	58	5.46468	Ribosomal protein		MSMEG_1339 MSMEG_1346 MSMEG_1364 MSMEG_1365 MSMEG_1398 MSMEG_1399 MSMEG_1435 MSMEG_1436 MSMEG_1437 MSMEG_1438 MSMEG_1439 MSMEG_1440 MSMEG_1441 MSMEG_1442 MSMEG_1443 MSMEG_1444 MSMEG_1445 MSMEG_1465 MSMEG_1466 MSMEG_1467 MSMEG_1468 MSMEG_1469 MSMEG_1520 MSMEG_1521 MSMEG_1522 MSMEG_1523 MSMEG_1525 MSMEG_1556 MSMEG_1557 MSMEG_2435 MSMEG_2440 MSMEG_2519 MSMEG_2654 MSMEG_3791 MSMEG_3792 MSMEG_4571 MSM…
1.0113e-23	44	59	5.37206	Ribonucleoprotein		MSMEG_1339 MSMEG_1346 MSMEG_1364 MSMEG_1365 MSMEG_1398 MSMEG_1399 MSMEG_1435 MSMEG_1436 MSMEG_1437 MSMEG_1438 MSMEG_1439 MSMEG_1440 MSMEG_1441 MSMEG_1442 MSMEG_1443 MSMEG_1444 MSMEG_1445 MSMEG_1465 MSMEG_1466 MSMEG_1467 MSMEG_1468 MSMEG_1469 MSMEG_1520 MSMEG_1521 MSMEG_1522 MSMEG_1523 MSMEG_1525 MSMEG_1556 MSMEG_1557 MSMEG_2435 MSMEG_2440 MSMEG_2519 MSMEG_2654 MSMEG_3791 MSMEG_3792 MSMEG_4571 MSM…
1.90946e-15	30	41	5.27081	rRNA-binding		MSMEG_1346 MSMEG_1364 MSMEG_1398 MSMEG_1399 MSMEG_1436 MSMEG_1437 MSMEG_1438 MSMEG_1439 MSMEG_1440 MSMEG_1441 MSMEG_1442 MSMEG_1443 MSMEG_1445 MSMEG_1465 MSMEG_1466 MSMEG_1467 MSMEG_1468 MSMEG_1469 MSMEG_1519 MSMEG_1521 MSMEG_1522 MSMEG_1523 MSMEG_2654 MSMEG_3791 MSMEG_4571 MSMEG_4625 MSMEG_4951 MSMEG_5431 MSMEG_6894 MSMEG_6897
2.4968e-13	74	209	2.5505	Peptide metabolic process	http://amigo.geneontology.org/amigo/term/GO:0006518	MSMEG_0014 MSMEG_0485 MSMEG_0821 MSMEG_1339 MSMEG_1346 MSMEG_1364 MSMEG_1365 MSMEG_1398 MSMEG_1399 MSMEG_1401 MSMEG_1435 MSMEG_1436 MSMEG_1437 MSMEG_1438 MSMEG_1439 MSMEG_1440 MSMEG_1441 MSMEG_1442 MSMEG_1443 MSMEG_1444 MSMEG_1445 MSMEG_1465 MSMEG_1466 MSMEG_1467 MSMEG_1468 MSMEG_1469 MSMEG_1519 MSMEG_1520 MSMEG_1521 MSMEG_1522 MSMEG_1523 MSMEG_1525 MSMEG_1556 MSMEG_1557 MSMEG_1734 MSMEG_2091 MSM…
6.42659e-13	73	208	2.52813	Peptide biosynthetic process	http://amigo.geneontology.org/amigo/term/GO:0043043	MSMEG_0014 MSMEG_0485 MSMEG_0821 MSMEG_1339 MSMEG_1346 MSMEG_1364 MSMEG_1365 MSMEG_1398 MSMEG_1399 MSMEG_1401 MSMEG_1435 MSMEG_1436 MSMEG_1437 MSMEG_1438 MSMEG_1439 MSMEG_1440 MSMEG_1441 MSMEG_1442 MSMEG_1443 MSMEG_1444 MSMEG_1445 MSMEG_1465 MSMEG_1466 MSMEG_1467 MSMEG_1468 MSMEG_1469 MSMEG_1519 MSMEG_1520 MSMEG_1521 MSMEG_1522 MSMEG_1523 MSMEG_1525 MSMEG_1556 MSMEG_1557 MSMEG_2091 MSMEG_2364 MSM…
1.74277e-12	37	70	3.80753	RNA-binding		MSMEG_1346 MSMEG_1364 MSMEG_1398 MSMEG_1399 MSMEG_1436 MSMEG_1437 MSMEG_1438 MSMEG_1439 MSMEG_1440 MSMEG_1441 MSMEG_1442 MSMEG_1443 MSMEG_1445 MSMEG_1465 MSMEG_1466 MSMEG_1467 MSMEG_1468 MSMEG_1469 MSMEG_1519 MSMEG_1521 MSMEG_1522 MSMEG_1523 MSMEG_2091 MSMEG_2436 MSMEG_2654 MSMEG_2656 MSMEG_2931 MSMEG_3777 MSMEG_3791 MSMEG_4571 MSMEG_4625 MSMEG_4951 MSMEG_4954 MSMEG_5431 MSMEG_6894 MSMEG_6897 MSM…
2.65512e-11	20	25	5.76276	Mixed, incl. universal stress protein a family, and nitroreductase-like		MSMEG_3936 MSMEG_3937 MSMEG_3939 MSMEG_3940 MSMEG_3942 MSMEG_3943 MSMEG_3945 MSMEG_3946 MSMEG_3948 MSMEG_3947 MSMEG_3949 MSMEG_3950 MSMEG_3952 MSMEG_3955 MSMEG_4919 MSMEG_5241 MSMEG_5242 MSMEG_5243 MSMEG_5244 MSMEG_5245
1.09812e-10	92	319	2.07748	Cellular amide metabolic process	http://amigo.geneontology.org/amigo/term/GO:0043603	MSMEG_0014 MSMEG_0485 MSMEG_0580 MSMEG_0821 MSMEG_1293 MSMEG_1339 MSMEG_1346 MSMEG_1364 MSMEG_1365 MSMEG_1398 MSMEG_1399 MSMEG_1401 MSMEG_1435 MSMEG_1436 MSMEG_1437 MSMEG_1438 MSMEG_1439 MSMEG_1440 MSMEG_1441 MSMEG_1442 MSMEG_1443 MSMEG_1444 MSMEG_1445 MSMEG_1465 MSMEG_1466 MSMEG_1467 MSMEG_1468 MSMEG_1469 MSMEG_1519 MSMEG_1520 MSMEG_1521 MSMEG_1522 MSMEG_1523 MSMEG_1525 MSMEG_1556 MSMEG_1557 MSM…
1.70301e-10	79	258	2.20571	Amide biosynthetic process	http://amigo.geneontology.org/amigo/term/GO:0043604	MSMEG_0014 MSMEG_0485 MSMEG_0821 MSMEG_1293 MSMEG_1339 MSMEG_1346 MSMEG_1364 MSMEG_1365 MSMEG_1398 MSMEG_1399 MSMEG_1401 MSMEG_1435 MSMEG_1436 MSMEG_1437 MSMEG_1438 MSMEG_1439 MSMEG_1440 MSMEG_1441 MSMEG_1442 MSMEG_1443 MSMEG_1444 MSMEG_1445 MSMEG_1465 MSMEG_1466 MSMEG_1467 MSMEG_1468 MSMEG_1469 MSMEG_1519 MSMEG_1520 MSMEG_1521 MSMEG_1522 MSMEG_1523 MSMEG_1525 MSMEG_1556 MSMEG_1557 MSMEG_2091 MSM…
1.58066e-09	45	115	2.81874	Structural molecule activity	http://amigo.geneontology.org/amigo/term/GO:0005198	MSMEG_1339 MSMEG_1346 MSMEG_1364 MSMEG_1365 MSMEG_1398 MSMEG_1399 MSMEG_1435 MSMEG_1436 MSMEG_1437 MSMEG_1438 MSMEG_1439 MSMEG_1440 MSMEG_1441 MSMEG_1442 MSMEG_1443 MSMEG_1444 MSMEG_1445 MSMEG_1465 MSMEG_1466 MSMEG_1467 MSMEG_1468 MSMEG_1469 MSMEG_1520 MSMEG_1521 MSMEG_1522 MSMEG_1523 MSMEG_1525 MSMEG_1556 MSMEG_1557 MSMEG_2435 MSMEG_2440 MSMEG_2519 MSMEG_2654 MSMEG_3050 MSMEG_3791 MSMEG_3792 MSM…
1.70833e-09	53	149	2.5623	Non-membrane-bounded organelle	http://amigo.geneontology.org/amigo/term/GO:0043228	MSMEG_0005 MSMEG_0006 MSMEG_0456 MSMEG_0457 MSMEG_1272 MSMEG_1339 MSMEG_1346 MSMEG_1364 MSMEG_1365 MSMEG_1398 MSMEG_1399 MSMEG_1435 MSMEG_1436 MSMEG_1437 MSMEG_1438 MSMEG_1439 MSMEG_1440 MSMEG_1441 MSMEG_1442 MSMEG_1443 MSMEG_1444 MSMEG_1445 MSMEG_1465 MSMEG_1466 MSMEG_1467 MSMEG_1468 MSMEG_1469 MSMEG_1520 MSMEG_1521 MSMEG_1522 MSMEG_1523 MSMEG_1525 MSMEG_1556 MSMEG_1557 MSMEG_2435 MSMEG_2437 MSM…
1.70833e-09	53	149	2.5623	Intracellular non-membrane-bounded organelle	http://amigo.geneontology.org/amigo/term/GO:0043232	MSMEG_0005 MSMEG_0006 MSMEG_0456 MSMEG_0457 MSMEG_1272 MSMEG_1339 MSMEG_1346 MSMEG_1364 MSMEG_1365 MSMEG_1398 MSMEG_1399 MSMEG_1435 MSMEG_1436 MSMEG_1437 MSMEG_1438 MSMEG_1439 MSMEG_1440 MSMEG_1441 MSMEG_1442 MSMEG_1443 MSMEG_1444 MSMEG_1445 MSMEG_1465 MSMEG_1466 MSMEG_1467 MSMEG_1468 MSMEG_1469 MSMEG_1520 MSMEG_1521 MSMEG_1522 MSMEG_1523 MSMEG_1525 MSMEG_1556 MSMEG_1557 MSMEG_2435 MSMEG_2437 MSM…
2.80402e-09	79	272	2.09218	Cytoplasm		MSMEG_0001 MSMEG_0005 MSMEG_0006 MSMEG_0055 MSMEG_0057 MSMEG_0062 MSMEG_0615 MSMEG_0759 MSMEG_0880 MSMEG_1401 MSMEG_1484 MSMEG_1519 MSMEG_1568 MSMEG_1582 MSMEG_1583 MSMEG_1597 MSMEG_1633 MSMEG_1651 MSMEG_1811 MSMEG_1843 MSMEG_1881 MSMEG_1953 MSMEG_2091 MSMEG_2379 MSMEG_2414 MSMEG_2437 MSMEG_2520 MSMEG_2541 MSMEG_2621 MSMEG_2656 MSMEG_2723 MSMEG_2724 MSMEG_2931 MSMEG_2964 MSMEG_3003 MSMEG_3035 MSM…
1.1989e-08	253	1289	1.41386	Cellular biosynthetic process	http://amigo.geneontology.org/amigo/term/GO:0044249	MSMEG_0001 MSMEG_0005 MSMEG_0006 MSMEG_0014 MSMEG_0220 MSMEG_0233 MSMEG_0239 MSMEG_0311 MSMEG_0384 MSMEG_0408 MSMEG_0409 MSMEG_0422 MSMEG_0437 MSMEG_0485 MSMEG_0546 MSMEG_0678 MSMEG_0759 MSMEG_0790 MSMEG_0789 MSMEG_0819 MSMEG_0821 MSMEG_0826 MSMEG_0830 MSMEG_0909 MSMEG_0912 MSMEG_0946 MSMEG_0948 MSMEG_0956 MSMEG_1028 MSMEG_1115 MSMEG_1293 MSMEG_1299 MSMEG_1322 MSMEG_1339 MSMEG_1340 MSMEG_1346 MSM…
3.05249e-08	15	19	5.68693	Mixed, incl. nitroreductase-like, and response to hypoxia		MSMEG_3942 MSMEG_3943 MSMEG_3945 MSMEG_3946 MSMEG_3948 MSMEG_3947 MSMEG_3949 MSMEG_3950 MSMEG_3952 MSMEG_3955 MSMEG_5241 MSMEG_5242 MSMEG_5243 MSMEG_5244 MSMEG_5245
3.05249e-08	110	448	1.7687	Macromolecule biosynthetic process	http://amigo.geneontology.org/amigo/term/GO:0009059	MSMEG_0001 MSMEG_0005 MSMEG_0006 MSMEG_0014 MSMEG_0233 MSMEG_0384 MSMEG_0390 MSMEG_0485 MSMEG_0790 MSMEG_0821 MSMEG_1322 MSMEG_1339 MSMEG_1346 MSMEG_1364 MSMEG_1365 MSMEG_1398 MSMEG_1399 MSMEG_1401 MSMEG_1435 MSMEG_1436 MSMEG_1437 MSMEG_1438 MSMEG_1439 MSMEG_1440 MSMEG_1441 MSMEG_1442 MSMEG_1443 MSMEG_1444 MSMEG_1445 MSMEG_1465 MSMEG_1466 MSMEG_1467 MSMEG_1468 MSMEG_1469 MSMEG_1519 MSMEG_1520 MSM…
3.05249e-08	105	421	1.79658	Cellular macromolecule biosynthetic process	http://amigo.geneontology.org/amigo/term/GO:0034645	MSMEG_0001 MSMEG_0005 MSMEG_0006 MSMEG_0014 MSMEG_0233 MSMEG_0384 MSMEG_0485 MSMEG_0790 MSMEG_0821 MSMEG_1322 MSMEG_1339 MSMEG_1346 MSMEG_1364 MSMEG_1365 MSMEG_1398 MSMEG_1399 MSMEG_1401 MSMEG_1435 MSMEG_1436 MSMEG_1437 MSMEG_1438 MSMEG_1439 MSMEG_1440 MSMEG_1441 MSMEG_1442 MSMEG_1443 MSMEG_1444 MSMEG_1445 MSMEG_1465 MSMEG_1466 MSMEG_1467 MSMEG_1468 MSMEG_1469 MSMEG_1519 MSMEG_1520 MSMEG_1521 MSM…
3.36421e-08	268	1398	1.38092	Biosynthetic process	http://amigo.geneontology.org/amigo/term/GO:0009058	MSMEG_0001 MSMEG_0005 MSMEG_0006 MSMEG_0014 MSMEG_0220 MSMEG_0233 MSMEG_0239 MSMEG_0311 MSMEG_0384 MSMEG_0390 MSMEG_0408 MSMEG_0409 MSMEG_0422 MSMEG_0437 MSMEG_0485 MSMEG_0546 MSMEG_0678 MSMEG_0688 MSMEG_0759 MSMEG_0782 MSMEG_0790 MSMEG_0789 MSMEG_0819 MSMEG_0821 MSMEG_0826 MSMEG_0830 MSMEG_0909 MSMEG_0912 MSMEG_0913 MSMEG_0946 MSMEG_0948 MSMEG_0956 MSMEG_1028 MSMEG_1115 MSMEG_1293 MSMEG_1299 MSM…
4.47732e-08	258	1338	1.38901	Organic substance biosynthetic process	http://amigo.geneontology.org/amigo/term/GO:1901576	MSMEG_0001 MSMEG_0005 MSMEG_0006 MSMEG_0014 MSMEG_0220 MSMEG_0233 MSMEG_0239 MSMEG_0311 MSMEG_0384 MSMEG_0390 MSMEG_0408 MSMEG_0409 MSMEG_0422 MSMEG_0437 MSMEG_0485 MSMEG_0546 MSMEG_0678 MSMEG_0759 MSMEG_0790 MSMEG_0789 MSMEG_0819 MSMEG_0821 MSMEG_0826 MSMEG_0830 MSMEG_0909 MSMEG_0912 MSMEG_0913 MSMEG_0946 MSMEG_0948 MSMEG_0956 MSMEG_1028 MSMEG_1115 MSMEG_1293 MSMEG_1322 MSMEG_1339 MSMEG_1340 MSM…
2.8021e-07	33	82	2.89895	rRNA binding	http://amigo.geneontology.org/amigo/term/GO:0019843	MSMEG_1346 MSMEG_1364 MSMEG_1398 MSMEG_1399 MSMEG_1436 MSMEG_1437 MSMEG_1438 MSMEG_1439 MSMEG_1440 MSMEG_1441 MSMEG_1442 MSMEG_1443 MSMEG_1445 MSMEG_1465 MSMEG_1466 MSMEG_1467 MSMEG_1468 MSMEG_1469 MSMEG_1519 MSMEG_1521 MSMEG_1522 MSMEG_1523 MSMEG_2654 MSMEG_3050 MSMEG_3791 MSMEG_4571 MSMEG_4625 MSMEG_4700 MSMEG_4951 MSMEG_5132 MSMEG_5431 MSMEG_6894 MSMEG_6897
2.8021e-07	95	383	1.78676	Cellular protein metabolic process	http://amigo.geneontology.org/amigo/term/GO:0044267	MSMEG_0014 MSMEG_0024 MSMEG_0028 MSMEG_0030 MSMEG_0246 MSMEG_0485 MSMEG_0765 MSMEG_0821 MSMEG_0886 MSMEG_1226 MSMEG_1236 MSMEG_1265 MSMEG_1339 MSMEG_1346 MSMEG_1364 MSMEG_1365 MSMEG_1398 MSMEG_1399 MSMEG_1401 MSMEG_1422 MSMEG_1423 MSMEG_1435 MSMEG_1436 MSMEG_1437 MSMEG_1438 MSMEG_1439 MSMEG_1440 MSMEG_1441 MSMEG_1442 MSMEG_1443 MSMEG_1444 MSMEG_1445 MSMEG_1465 MSMEG_1466 MSMEG_1467 MSMEG_1468 MSM…
5.10038e-07	136	619	1.58266	Cellular nitrogen compound biosynthetic process	http://amigo.geneontology.org/amigo/term/GO:0044271	MSMEG_0001 MSMEG_0014 MSMEG_0384 MSMEG_0437 MSMEG_0485 MSMEG_0678 MSMEG_0759 MSMEG_0789 MSMEG_0821 MSMEG_0826 MSMEG_0956 MSMEG_1293 MSMEG_1339 MSMEG_1346 MSMEG_1364 MSMEG_1365 MSMEG_1398 MSMEG_1399 MSMEG_1401 MSMEG_1422 MSMEG_1423 MSMEG_1425 MSMEG_1435 MSMEG_1436 MSMEG_1437 MSMEG_1438 MSMEG_1439 MSMEG_1440 MSMEG_1441 MSMEG_1442 MSMEG_1443 MSMEG_1444 MSMEG_1445 MSMEG_1465 MSMEG_1466 MSMEG_1467 MSM…
6.669e-07	21	40	3.78181	Lipid transport		MSMEG_1141 MSMEG_1142 MSMEG_1143 MSMEG_1144 MSMEG_1145 MSMEG_1146 MSMEG_1147 MSMEG_1148 MSMEG_1149 MSMEG_1150 MSMEG_4793 MSMEG_5893 MSMEG_5894 MSMEG_5895 MSMEG_5896 MSMEG_5897 MSMEG_5898 MSMEG_5899 MSMEG_5900 MSMEG_5901 MSMEG_5902
1.00494e-06	161	774	1.49839	Organonitrogen compound biosynthetic process	http://amigo.geneontology.org/amigo/term/GO:1901566	MSMEG_0014 MSMEG_0233 MSMEG_0239 MSMEG_0437 MSMEG_0485 MSMEG_0678 MSMEG_0759 MSMEG_0789 MSMEG_0819 MSMEG_0821 MSMEG_0826 MSMEG_0956 MSMEG_1293 MSMEG_1322 MSMEG_1339 MSMEG_1346 MSMEG_1364 MSMEG_1365 MSMEG_1398 MSMEG_1399 MSMEG_1401 MSMEG_1422 MSMEG_1423 MSMEG_1425 MSMEG_1435 MSMEG_1436 MSMEG_1437 MSMEG_1438 MSMEG_1439 MSMEG_1440 MSMEG_1441 MSMEG_1442 MSMEG_1443 MSMEG_1444 MSMEG_1445 MSMEG_1465 MSM…
1.0463e-06	32	82	2.8111	Mixed, incl. response to hypoxia, and biosynthesis of unsaturated fatty acids		MSMEG_1433 MSMEG_1741 MSMEG_1742 MSMEG_1743 MSMEG_1880 MSMEG_1884 MSMEG_1886 MSMEG_1887 MSMEG_2920 MSMEG_3933 MSMEG_3936 MSMEG_3937 MSMEG_3939 MSMEG_3940 MSMEG_3942 MSMEG_3943 MSMEG_3945 MSMEG_3946 MSMEG_3948 MSMEG_3947 MSMEG_3949 MSMEG_3950 MSMEG_3952 MSMEG_3955 MSMEG_4919 MSMEG_5241 MSMEG_5242 MSMEG_5243 MSMEG_5244 MSMEG_5245 MSMEG_5248 MSMEG_5771
2.82211e-06	85	346	1.76963	Gene expression	http://amigo.geneontology.org/amigo/term/GO:0010467	MSMEG_0014 MSMEG_0485 MSMEG_0624 MSMEG_0821 MSMEG_1339 MSMEG_1346 MSMEG_1364 MSMEG_1365 MSMEG_1398 MSMEG_1399 MSMEG_1401 MSMEG_1435 MSMEG_1436 MSMEG_1437 MSMEG_1438 MSMEG_1439 MSMEG_1440 MSMEG_1441 MSMEG_1442 MSMEG_1443 MSMEG_1444 MSMEG_1445 MSMEG_1465 MSMEG_1466 MSMEG_1467 MSMEG_1468 MSMEG_1469 MSMEG_1485 MSMEG_1519 MSMEG_1520 MSMEG_1521 MSMEG_1522 MSMEG_1523 MSMEG_1524 MSMEG_1525 MSMEG_1527 MSM…
4.83941e-06	23	51	3.24861	Isopeptide bond		MSMEG_0457 MSMEG_0759 MSMEG_0880 MSMEG_1346 MSMEG_1445 MSMEG_1843 MSMEG_2373 MSMEG_2520 MSMEG_2621 MSMEG_3055 MSMEG_3950 MSMEG_4290 MSMEG_4325 MSMEG_4326 MSMEG_4891 MSMEG_4920 MSMEG_4956 MSMEG_5789 MSMEG_5790 MSMEG_6159 MSMEG_6286 MSMEG_6897 MSMEG_6904
7.40492e-06	23	52	3.18614	Ubl conjugation		MSMEG_0457 MSMEG_0759 MSMEG_0880 MSMEG_1346 MSMEG_1445 MSMEG_1843 MSMEG_2373 MSMEG_2520 MSMEG_2621 MSMEG_3055 MSMEG_3950 MSMEG_4290 MSMEG_4325 MSMEG_4326 MSMEG_4891 MSMEG_4920 MSMEG_4956 MSMEG_5789 MSMEG_5790 MSMEG_6159 MSMEG_6286 MSMEG_6897 MSMEG_6904
1.04929e-05	8	8	7.20344	Virulence factor Mce protein, and Permease MlaE		MSMEG_5895 MSMEG_5896 MSMEG_5897 MSMEG_5898 MSMEG_5899 MSMEG_5900 MSMEG_5901 MSMEG_5902
1.24148e-05	216	1147	1.35653	Cellular nitrogen compound metabolic process	http://amigo.geneontology.org/amigo/term/GO:0034641	MSMEG_0001 MSMEG_0005 MSMEG_0006 MSMEG_0014 MSMEG_0202 MSMEG_0384 MSMEG_0437 MSMEG_0456 MSMEG_0457 MSMEG_0485 MSMEG_0580 MSMEG_0678 MSMEG_0725 MSMEG_0752 MSMEG_0759 MSMEG_0790 MSMEG_0789 MSMEG_0821 MSMEG_0826 MSMEG_0956 MSMEG_1047 MSMEG_1119 MSMEG_1272 MSMEG_1293 MSMEG_1339 MSMEG_1346 MSMEG_1364 MSMEG_1365 MSMEG_1398 MSMEG_1399 MSMEG_1401 MSMEG_1422 MSMEG_1423 MSMEG_1425 MSMEG_1435 MSMEG_1436 MSM…
2.70934e-05	56	208	1.93939	RNA binding	http://amigo.geneontology.org/amigo/term/GO:0003723	MSMEG_1247 MSMEG_1346 MSMEG_1364 MSMEG_1396 MSMEG_1398 MSMEG_1399 MSMEG_1401 MSMEG_1435 MSMEG_1436 MSMEG_1437 MSMEG_1438 MSMEG_1439 MSMEG_1440 MSMEG_1441 MSMEG_1442 MSMEG_1443 MSMEG_1445 MSMEG_1465 MSMEG_1466 MSMEG_1467 MSMEG_1468 MSMEG_1469 MSMEG_1519 MSMEG_1521 MSMEG_1522 MSMEG_1523 MSMEG_1527 MSMEG_1540 MSMEG_1930 MSMEG_2091 MSMEG_2436 MSMEG_2520 MSMEG_2541 MSMEG_2654 MSMEG_2656 MSMEG_2931 MSM…
5.94456e-05	19	42	3.2587	Protein biosynthesis		MSMEG_1401 MSMEG_1519 MSMEG_2364 MSMEG_2365 MSMEG_2520 MSMEG_2541 MSMEG_2621 MSMEG_2931 MSMEG_3003 MSMEG_3035 MSMEG_3777 MSMEG_3793 MSMEG_4485 MSMEG_4950 MSMEG_4959 MSMEG_6074 MSMEG_6094 MSMEG_6413 MSMEG_6917
8.70223e-05	109	512	1.53355	Protein metabolic process	http://amigo.geneontology.org/amigo/term/GO:0019538	MSMEG_0014 MSMEG_0024 MSMEG_0028 MSMEG_0030 MSMEG_0233 MSMEG_0246 MSMEG_0485 MSMEG_0624 MSMEG_0765 MSMEG_0821 MSMEG_0886 MSMEG_1226 MSMEG_1236 MSMEG_1265 MSMEG_1322 MSMEG_1339 MSMEG_1346 MSMEG_1364 MSMEG_1365 MSMEG_1398 MSMEG_1399 MSMEG_1401 MSMEG_1422 MSMEG_1423 MSMEG_1435 MSMEG_1436 MSMEG_1437 MSMEG_1438 MSMEG_1439 MSMEG_1440 MSMEG_1441 MSMEG_1442 MSMEG_1443 MSMEG_1444 MSMEG_1445 MSMEG_1465 MSM…
0.000118218	89	399	1.60678	Nucleotide-binding		MSMEG_0005 MSMEG_0006 MSMEG_0015 MSMEG_0017 MSMEG_0018 MSMEG_0028 MSMEG_0061 MSMEG_0062 MSMEG_0116 MSMEG_0246 MSMEG_0457 MSMEG_0615 MSMEG_0616 MSMEG_0617 MSMEG_0678 MSMEG_0759 MSMEG_0866 MSMEG_0880 MSMEG_1401 MSMEG_1484 MSMEG_1540 MSMEG_1583 MSMEG_1881 MSMEG_1930 MSMEG_1934 MSMEG_1941 MSMEG_1943 MSMEG_1952 MSMEG_2364 MSMEG_2365 MSMEG_2414 MSMEG_2621 MSMEG_2723 MSMEG_2728 MSMEG_2743 MSMEG_2931 MSM…
0.000130749	75	321	1.68305	Intracellular organelle	http://amigo.geneontology.org/amigo/term/GO:0043229	MSMEG_0005 MSMEG_0006 MSMEG_0239 MSMEG_0337 MSMEG_0422 MSMEG_0456 MSMEG_0457 MSMEG_0540 MSMEG_0765 MSMEG_0909 MSMEG_1050 MSMEG_1119 MSMEG_1226 MSMEG_1247 MSMEG_1272 MSMEG_1339 MSMEG_1346 MSMEG_1364 MSMEG_1365 MSMEG_1398 MSMEG_1399 MSMEG_1435 MSMEG_1436 MSMEG_1437 MSMEG_1438 MSMEG_1439 MSMEG_1440 MSMEG_1441 MSMEG_1442 MSMEG_1443 MSMEG_1444 MSMEG_1445 MSMEG_1465 MSMEG_1466 MSMEG_1467 MSMEG_1468 MSM…
0.000144517	21	52	2.90908	Lipid transport, and cholesterol uptake porter cup1 of mce4, putative		MSMEG_1141 MSMEG_1142 MSMEG_1143 MSMEG_1144 MSMEG_1145 MSMEG_1146 MSMEG_1147 MSMEG_1148 MSMEG_1149 MSMEG_1150 MSMEG_4793 MSMEG_5893 MSMEG_5894 MSMEG_5895 MSMEG_5896 MSMEG_5897 MSMEG_5898 MSMEG_5899 MSMEG_5900 MSMEG_5901 MSMEG_5902
0.000168178	25	69	2.60994	Mixed, incl. phosphopantetheine binding, and siderophore metabolic process		MSMEG_0014 MSMEG_0017 MSMEG_0018 MSMEG_0390 MSMEG_0391 MSMEG_0392 MSMEG_0406 MSMEG_0408 MSMEG_0409 MSMEG_0413 MSMEG_4509 MSMEG_4511 MSMEG_4513 MSMEG_4515 MSMEG_4524 MSMEG_4727 MSMEG_4728 MSMEG_4729 MSMEG_4730 MSMEG_4731 MSMEG_4732 MSMEG_4739 MSMEG_4740 MSMEG_4741 MSMEG_4961
0.000184275	78	341	1.64771	ATP-binding		MSMEG_0005 MSMEG_0006 MSMEG_0015 MSMEG_0017 MSMEG_0018 MSMEG_0028 MSMEG_0061 MSMEG_0062 MSMEG_0116 MSMEG_0246 MSMEG_0457 MSMEG_0615 MSMEG_0616 MSMEG_0617 MSMEG_0866 MSMEG_0880 MSMEG_1484 MSMEG_1540 MSMEG_1583 MSMEG_1881 MSMEG_1930 MSMEG_1934 MSMEG_1941 MSMEG_1943 MSMEG_1952 MSMEG_2364 MSMEG_2365 MSMEG_2414 MSMEG_2621 MSMEG_2723 MSMEG_2728 MSMEG_2743 MSMEG_2931 MSMEG_3003 MSMEG_3046 MSMEG_3047 MSM…
0.000186529	76	330	1.65898	Organelle	http://amigo.geneontology.org/amigo/term/GO:0043226	MSMEG_0005 MSMEG_0006 MSMEG_0239 MSMEG_0337 MSMEG_0422 MSMEG_0456 MSMEG_0457 MSMEG_0540 MSMEG_0765 MSMEG_0909 MSMEG_1050 MSMEG_1119 MSMEG_1226 MSMEG_1247 MSMEG_1272 MSMEG_1339 MSMEG_1346 MSMEG_1364 MSMEG_1365 MSMEG_1398 MSMEG_1399 MSMEG_1435 MSMEG_1436 MSMEG_1437 MSMEG_1438 MSMEG_1439 MSMEG_1440 MSMEG_1441 MSMEG_1442 MSMEG_1443 MSMEG_1444 MSMEG_1445 MSMEG_1465 MSMEG_1466 MSMEG_1467 MSMEG_1468 MSM…
0.000253388	10	15	4.8023	Antibiotic resistance		MSMEG_0001 MSMEG_0006 MSMEG_1641 MSMEG_1953 MSMEG_2658 MSMEG_3151 MSMEG_3858 MSMEG_4194 MSMEG_4914 MSMEG_6382
0.000260336	18	42	3.08719	Rossmann-like alpha/beta/alpha sandwich fold	https://www.ebi.ac.uk/interpro/entry/InterPro/IPR014729	MSMEG_2351 MSMEG_2352 MSMEG_2414 MSMEG_3770 MSMEG_3936 MSMEG_3939 MSMEG_3940 MSMEG_3945 MSMEG_3950 MSMEG_4189 MSMEG_4528 MSMEG_4959 MSMEG_4979 MSMEG_5245 MSMEG_5733 MSMEG_6074 MSMEG_6097 MSMEG_6917
0.000309524	230	1289	1.28533	Organonitrogen compound metabolic process	http://amigo.geneontology.org/amigo/term/GO:1901564	MSMEG_0014 MSMEG_0024 MSMEG_0028 MSMEG_0030 MSMEG_0233 MSMEG_0239 MSMEG_0246 MSMEG_0337 MSMEG_0437 MSMEG_0485 MSMEG_0560 MSMEG_0580 MSMEG_0624 MSMEG_0678 MSMEG_0752 MSMEG_0759 MSMEG_0765 MSMEG_0782 MSMEG_0789 MSMEG_0819 MSMEG_0821 MSMEG_0826 MSMEG_0886 MSMEG_0956 MSMEG_1119 MSMEG_1226 MSMEG_1236 MSMEG_1265 MSMEG_1293 MSMEG_1322 MSMEG_1339 MSMEG_1346 MSMEG_1364 MSMEG_1365 MSMEG_1398 MSMEG_1399 MSM…
0.000340142	34	113	2.16741	Macromolecule localization	http://amigo.geneontology.org/amigo/term/GO:0033036	MSMEG_0061 MSMEG_0062 MSMEG_0065 MSMEG_0066 MSMEG_0076 MSMEG_0413 MSMEG_0617 MSMEG_1141 MSMEG_1142 MSMEG_1143 MSMEG_1144 MSMEG_1145 MSMEG_1146 MSMEG_1147 MSMEG_1148 MSMEG_1881 MSMEG_1929 MSMEG_2961 MSMEG_3015 MSMEG_4674 MSMEG_4733 MSMEG_4793 MSMEG_4995 MSMEG_4996 MSMEG_4999 MSMEG_5069 MSMEG_5895 MSMEG_5897 MSMEG_5898 MSMEG_5899 MSMEG_5900 MSMEG_5901 MSMEG_5902 MSMEG_6942
0.000409387	6	6	7.20344	Mixed, incl. 5s rrna binding, and ribosomal protein l34		MSMEG_1525 MSMEG_1556 MSMEG_2435 MSMEG_4571 MSMEG_5431 MSMEG_6946
0.000409387	6	6	7.20344	Mce/MlaD		MSMEG_1141 MSMEG_1143 MSMEG_1144 MSMEG_1146 MSMEG_1147 MSMEG_1148
0.000409387	6	6	7.20344	Fatty acid biosynthesis		MSMEG_0220 MSMEG_3150 MSMEG_3151 MSMEG_4325 MSMEG_4326 MSMEG_4756
0.000409387	7	8	6.30301	Fatty acid metabolism		MSMEG_0220 MSMEG_3150 MSMEG_3151 MSMEG_4325 MSMEG_4326 MSMEG_4727 MSMEG_4756
0.000518055	11	19	4.17042	Mixed, incl. abc transporter periplasmic binding domain, and feccd transport family		MSMEG_0009 MSMEG_0012 MSMEG_0015 MSMEG_0020 MSMEG_1039 MSMEG_1042 MSMEG_4557 MSMEG_4559 MSMEG_4560 MSMEG_4561 MSMEG_6063
0.000732096	162	866	1.34753	Cellular macromolecule metabolic process	http://amigo.geneontology.org/amigo/term/GO:0044260	MSMEG_0001 MSMEG_0005 MSMEG_0006 MSMEG_0014 MSMEG_0024 MSMEG_0028 MSMEG_0030 MSMEG_0202 MSMEG_0233 MSMEG_0246 MSMEG_0384 MSMEG_0456 MSMEG_0457 MSMEG_0485 MSMEG_0725 MSMEG_0765 MSMEG_0790 MSMEG_0821 MSMEG_0886 MSMEG_1226 MSMEG_1236 MSMEG_1265 MSMEG_1272 MSMEG_1322 MSMEG_1339 MSMEG_1346 MSMEG_1364 MSMEG_1365 MSMEG_1398 MSMEG_1399 MSMEG_1401 MSMEG_1422 MSMEG_1423 MSMEG_1435 MSMEG_1436 MSMEG_1437 MSM…
0.00141665	12	24	3.60172	Fatty acid synthase activity, and coa carboxylase activity		MSMEG_1917 MSMEG_3150 MSMEG_3151 MSMEG_3951 MSMEG_3953 MSMEG_4325 MSMEG_4326 MSMEG_4327 MSMEG_4329 MSMEG_4756 MSMEG_4757 MSMEG_6635
0.00142072	15	35	3.08719	Mixed, incl. fatty acid synthase activity, and coa carboxylase activity		MSMEG_1917 MSMEG_3150 MSMEG_3151 MSMEG_3951 MSMEG_3953 MSMEG_4325 MSMEG_4326 MSMEG_4327 MSMEG_4329 MSMEG_4756 MSMEG_4757 MSMEG_6396 MSMEG_6397 MSMEG_6398 MSMEG_6635
0.00166827	47	189	1.79133	Mixed, incl. external encapsulating structure organization, and transmembrane helix		MSMEG_0315 MSMEG_0830 MSMEG_0909 MSMEG_0927 MSMEG_0941 MSMEG_1570 MSMEG_1684 MSMEG_1823 MSMEG_1920 MSMEG_1929 MSMEG_1930 MSMEG_2349 MSMEG_2350 MSMEG_2363 MSMEG_2697 MSMEG_3148 MSMEG_3149 MSMEG_3630 MSMEG_3817 MSMEG_3857 MSMEG_4239 MSMEG_4241 MSMEG_4245 MSMEG_4896 MSMEG_4900 MSMEG_5130 MSMEG_5136 MSMEG_5223 MSMEG_5704 MSMEG_5785 MSMEG_5835 MSMEG_5840 MSMEG_6143 MSMEG_6372 MSMEG_6382 MSMEG_6385 MSM…
0.00183427	41	158	1.86925	Mostly uncharacterized, incl. external encapsulating structure organization, and transferase activity, transferring hexosyl groups		MSMEG_0315 MSMEG_0830 MSMEG_0909 MSMEG_0927 MSMEG_0941 MSMEG_1684 MSMEG_1823 MSMEG_1920 MSMEG_1929 MSMEG_1930 MSMEG_2349 MSMEG_2350 MSMEG_2363 MSMEG_3148 MSMEG_3149 MSMEG_3817 MSMEG_4239 MSMEG_4241 MSMEG_4245 MSMEG_4896 MSMEG_4900 MSMEG_5130 MSMEG_5136 MSMEG_5223 MSMEG_5704 MSMEG_5785 MSMEG_6143 MSMEG_6372 MSMEG_6382 MSMEG_6385 MSMEG_6386 MSMEG_6387 MSMEG_6388 MSMEG_6389 MSMEG_6400 MSMEG_6401 MSM…
0.00226748	6	7	6.17438	Mixed, incl. zeta toxin, and tagatose/fructose phosphokinase		MSMEG_3942 MSMEG_3943 MSMEG_3947 MSMEG_3949 MSMEG_3950 MSMEG_3952
0.0024987	5	5	7.20344	Oxidoreductase activity, acting on hydrogen as donor, nad or nadp as acceptor, and 4fe-4s dicluster domain		MSMEG_3927 MSMEG_3928 MSMEG_3929 MSMEG_3930 MSMEG_3931
0.0024987	5	5	7.20344	Threonine biosynthesis		MSMEG_4955 MSMEG_4956 MSMEG_4957 MSMEG_6256 MSMEG_6257
0.0024987	5	5	7.20344	Mixed, incl. ribosomal protein s8, and ribosomal protein s19		MSMEG_1438 MSMEG_1440 MSMEG_1465 MSMEG_1468 MSMEG_1469
0.0024987	5	5	7.20344	Initiation factor, and Ribosomal_S15		MSMEG_1519 MSMEG_2519 MSMEG_2654 MSMEG_3050 MSMEG_3793
0.0024987	5	5	7.20344	Mixed, incl. domain of unknown function duf4395, and protein of unknown function duf1416		MSMEG_5788 MSMEG_5789 MSMEG_5790 MSMEG_5791 MSMEG_5792
0.00366328	301	1817	1.19331	Nitrogen compound metabolic process	http://amigo.geneontology.org/amigo/term/GO:0006807	MSMEG_0001 MSMEG_0005 MSMEG_0006 MSMEG_0014 MSMEG_0024 MSMEG_0028 MSMEG_0030 MSMEG_0202 MSMEG_0233 MSMEG_0239 MSMEG_0246 MSMEG_0337 MSMEG_0384 MSMEG_0437 MSMEG_0456 MSMEG_0457 MSMEG_0485 MSMEG_0560 MSMEG_0580 MSMEG_0624 MSMEG_0678 MSMEG_0725 MSMEG_0752 MSMEG_0759 MSMEG_0765 MSMEG_0782 MSMEG_0790 MSMEG_0789 MSMEG_0819 MSMEG_0821 MSMEG_0826 MSMEG_0886 MSMEG_0956 MSMEG_1047 MSMEG_1119 MSMEG_1226 MSM…
0.00416174	8	13	4.43289	FecCD transport family, and ABC transporter periplasmic binding domain		MSMEG_0012 MSMEG_0015 MSMEG_0020 MSMEG_4557 MSMEG_4559 MSMEG_4560 MSMEG_4561 MSMEG_6063
0.00430955	22	69	2.29675	Nucleoside monophosphate metabolic process, and pyrimidine metabolism		MSMEG_0678 MSMEG_0759 MSMEG_1484 MSMEG_1621 MSMEG_1701 MSMEG_2200 MSMEG_2742 MSMEG_2743 MSMEG_2964 MSMEG_3046 MSMEG_3047 MSMEG_3051 MSMEG_4483 MSMEG_4627 MSMEG_4687 MSMEG_4899 MSMEG_5274 MSMEG_5798 MSMEG_5831 MSMEG_5832 MSMEG_5841 MSMEG_5852
0.00458388	37	144	1.85089	Mixed, incl. external encapsulating structure organization, and transferase activity, transferring hexosyl groups		MSMEG_0315 MSMEG_0830 MSMEG_0909 MSMEG_0941 MSMEG_1684 MSMEG_1823 MSMEG_1920 MSMEG_1929 MSMEG_1930 MSMEG_2349 MSMEG_2350 MSMEG_2363 MSMEG_3148 MSMEG_3149 MSMEG_4239 MSMEG_4241 MSMEG_4245 MSMEG_4896 MSMEG_4900 MSMEG_5130 MSMEG_5136 MSMEG_5223 MSMEG_5704 MSMEG_5785 MSMEG_6143 MSMEG_6372 MSMEG_6382 MSMEG_6385 MSMEG_6386 MSMEG_6387 MSMEG_6388 MSMEG_6389 MSMEG_6400 MSMEG_6401 MSMEG_6403 MSMEG_6404 MSM…
0.00458388	17	47	2.6055	Mostly uncharacterized, incl. mycothiol metabolic process, and arsenical pump atpase, arsa/get3		MSMEG_0932 MSMEG_0946 MSMEG_0948 MSMEG_1915 MSMEG_1947 MSMEG_4189 MSMEG_4193 MSMEG_4194 MSMEG_5264 MSMEG_5783 MSMEG_5787 MSMEG_5788 MSMEG_5789 MSMEG_5790 MSMEG_5791 MSMEG_5792 MSMEG_6195
0.00514226	26	89	2.10438	Fatty acid biosynthetic process	http://amigo.geneontology.org/amigo/term/GO:0006633	MSMEG_0220 MSMEG_0408 MSMEG_0909 MSMEG_0912 MSMEG_0948 MSMEG_1340 MSMEG_1743 MSMEG_1886 MSMEG_2201 MSMEG_3150 MSMEG_3151 MSMEG_3951 MSMEG_3953 MSMEG_4325 MSMEG_4326 MSMEG_4327 MSMEG_4329 MSMEG_4513 MSMEG_4515 MSMEG_4727 MSMEG_4731 MSMEG_4756 MSMEG_4757 MSMEG_4896 MSMEG_5248 MSMEG_6648
0.00514226	32	119	1.93706	Ligase		MSMEG_0759 MSMEG_0821 MSMEG_1813 MSMEG_2364 MSMEG_2365 MSMEG_2621 MSMEG_2931 MSMEG_3003 MSMEG_3046 MSMEG_3047 MSMEG_3054 MSMEG_3770 MSMEG_3777 MSMEG_3864 MSMEG_4189 MSMEG_4269 MSMEG_4290 MSMEG_4329 MSMEG_4485 MSMEG_4959 MSMEG_5798 MSMEG_5831 MSMEG_5832 MSMEG_5841 MSMEG_5852 MSMEG_6074 MSMEG_6094 MSMEG_6097 MSMEG_6276 MSMEG_6413 MSMEG_6648 MSMEG_6917
0.00550805	23	75	2.20906	Mostly uncharacterized, incl. external encapsulating structure organization, and liposaccharide metabolic process		MSMEG_0315 MSMEG_0830 MSMEG_0909 MSMEG_0941 MSMEG_1684 MSMEG_1929 MSMEG_1930 MSMEG_2349 MSMEG_2350 MSMEG_2363 MSMEG_4239 MSMEG_4241 MSMEG_4896 MSMEG_4900 MSMEG_5130 MSMEG_5223 MSMEG_5785 MSMEG_6143 MSMEG_6386 MSMEG_6387 MSMEG_6388 MSMEG_6389 MSMEG_6400
0.00592822	21	66	2.29201	Mixed, incl. external encapsulating structure organization, and liposaccharide metabolic process		MSMEG_0315 MSMEG_0909 MSMEG_1684 MSMEG_1929 MSMEG_1930 MSMEG_2349 MSMEG_2350 MSMEG_2363 MSMEG_4239 MSMEG_4241 MSMEG_4896 MSMEG_4900 MSMEG_5130 MSMEG_5223 MSMEG_5785 MSMEG_6143 MSMEG_6386 MSMEG_6387 MSMEG_6388 MSMEG_6389 MSMEG_6400
0.00727702	13	32	2.9264	Response to hypoxia	http://amigo.geneontology.org/amigo/term/GO:0001666	MSMEG_0057 MSMEG_0911 MSMEG_3932 MSMEG_3933 MSMEG_3940 MSMEG_3944 MSMEG_3945 MSMEG_3948 MSMEG_3950 MSMEG_5242 MSMEG_5244 MSMEG_5245 MSMEG_5733
0.00750765	8	14	4.11625	Mixed, incl. fatty acid biosynthesis, and beta-ketoacyl synthase		MSMEG_3150 MSMEG_3151 MSMEG_4325 MSMEG_4326 MSMEG_4327 MSMEG_4329 MSMEG_4756 MSMEG_4757
0.00750765	8	14	4.11625	Mixed, incl. protein secretion, and cbxx/cfxq		MSMEG_0055 MSMEG_0057 MSMEG_0061 MSMEG_0062 MSMEG_0063 MSMEG_0064 MSMEG_0065 MSMEG_0066
0.00942394	32	123	1.87407	Monocarboxylic acid biosynthetic process	http://amigo.geneontology.org/amigo/term/GO:0072330	MSMEG_0220 MSMEG_0408 MSMEG_0422 MSMEG_0909 MSMEG_0912 MSMEG_0948 MSMEG_1340 MSMEG_1743 MSMEG_1886 MSMEG_2201 MSMEG_3150 MSMEG_3151 MSMEG_3189 MSMEG_3901 MSMEG_3951 MSMEG_3953 MSMEG_4269 MSMEG_4325 MSMEG_4326 MSMEG_4327 MSMEG_4329 MSMEG_4513 MSMEG_4515 MSMEG_4524 MSMEG_4727 MSMEG_4731 MSMEG_4756 MSMEG_4757 MSMEG_4896 MSMEG_5248 MSMEG_6097 MSMEG_6648
0.0104863	5	6	6.00287	Urease activity, and nickel insertion		MSMEG_3623 MSMEG_3624 MSMEG_3625 MSMEG_3626 MSMEG_3627
0.0104863	5	6	6.00287	Mixed, incl. ribosomal protein l5, and ribosomal protein s13		MSMEG_1364 MSMEG_1467 MSMEG_1521 MSMEG_1522 MSMEG_3792
0.0104863	5	6	6.00287	Universal stress protein A family, and Tetratricopeptide repeat		MSMEG_3936 MSMEG_3937 MSMEG_3939 MSMEG_3940 MSMEG_4919
0.0104863	5	6	6.00287	Topoisomerase		MSMEG_0005 MSMEG_0006 MSMEG_0456 MSMEG_0457 MSMEG_6157
0.0106761	189	1092	1.24675	Macromolecule metabolic process	http://amigo.geneontology.org/amigo/term/GO:0043170	MSMEG_0001 MSMEG_0005 MSMEG_0006 MSMEG_0014 MSMEG_0024 MSMEG_0028 MSMEG_0030 MSMEG_0202 MSMEG_0233 MSMEG_0246 MSMEG_0384 MSMEG_0390 MSMEG_0456 MSMEG_0457 MSMEG_0485 MSMEG_0624 MSMEG_0725 MSMEG_0765 MSMEG_0790 MSMEG_0821 MSMEG_0886 MSMEG_1226 MSMEG_1236 MSMEG_1265 MSMEG_1272 MSMEG_1322 MSMEG_1339 MSMEG_1346 MSMEG_1364 MSMEG_1365 MSMEG_1398 MSMEG_1399 MSMEG_1401 MSMEG_1422 MSMEG_1423 MSMEG_1435 MSM…
0.0116138	19	60	2.28109	Lipid localization	http://amigo.geneontology.org/amigo/term/GO:0010876	MSMEG_0413 MSMEG_1141 MSMEG_1142 MSMEG_1143 MSMEG_1144 MSMEG_1145 MSMEG_1146 MSMEG_1147 MSMEG_1148 MSMEG_3015 MSMEG_4733 MSMEG_4793 MSMEG_5895 MSMEG_5897 MSMEG_5898 MSMEG_5899 MSMEG_5900 MSMEG_5901 MSMEG_5902
0.0122705	10	22	3.27429	Mixed, incl. oxidoreductase activity, acting on paired donors, with oxidation of a pair of donors resulting in the reduction of molecular oxygen to two molecules of water, and triglyceride biosynthetic process		MSMEG_1433 MSMEG_1741 MSMEG_1742 MSMEG_1743 MSMEG_1880 MSMEG_1884 MSMEG_1886 MSMEG_1887 MSMEG_3933 MSMEG_5248
0.0122705	10	22	3.27429	Aminoacyl-tRNA synthetase		MSMEG_2621 MSMEG_2931 MSMEG_3003 MSMEG_3777 MSMEG_4485 MSMEG_4959 MSMEG_6074 MSMEG_6094 MSMEG_6413 MSMEG_6917
0.0124958	8	15	3.84184	Mixed, incl. cdp-alcohol phosphatidyltransferase, and amine-lyase activity		MSMEG_2692 MSMEG_2693 MSMEG_2932 MSMEG_2933 MSMEG_2936 MSMEG_2937 MSMEG_2938 MSMEG_2939
0.0124958	8	15	3.84184	Mixed, incl. embc c-terminal domain, and capsule organization		MSMEG_0315 MSMEG_0909 MSMEG_6143 MSMEG_6386 MSMEG_6387 MSMEG_6388 MSMEG_6389 MSMEG_6400
0.0124958	4	4	7.20344	Glutamate synthase (nadph) activity	http://amigo.geneontology.org/amigo/term/GO:0004355	MSMEG_3225 MSMEG_3226 MSMEG_6458 MSMEG_6459
0.0124958	4	4	7.20344	Glutamate synthase activity, nad(p)h as acceptor	http://amigo.geneontology.org/amigo/term/GO:0045181	MSMEG_3225 MSMEG_3226 MSMEG_6458 MSMEG_6459
0.0124958	4	4	7.20344	L-glutamate biosynthetic process	http://amigo.geneontology.org/amigo/term/GO:0097054	MSMEG_3225 MSMEG_3226 MSMEG_6458 MSMEG_6459
0.0124958	4	4	7.20344	Aminoacyl-tRNA synthetase, class II (G/ P/ S/T)	https://www.ebi.ac.uk/interpro/entry/InterPro/IPR002314	MSMEG_2621 MSMEG_2931 MSMEG_4485 MSMEG_6413
0.0124958	11	26	3.04761	Lipid biosynthesis		MSMEG_0220 MSMEG_2692 MSMEG_2933 MSMEG_3150 MSMEG_3151 MSMEG_3948 MSMEG_4325 MSMEG_4326 MSMEG_4756 MSMEG_5130 MSMEG_5242
0.0132554	19	61	2.2437	Mostly uncharacterized, incl. actinobacterium-type cell wall biogenesis, and cellular polysaccharide biosynthetic process		MSMEG_0315 MSMEG_0909 MSMEG_1684 MSMEG_2349 MSMEG_2350 MSMEG_2363 MSMEG_4239 MSMEG_4241 MSMEG_4896 MSMEG_4900 MSMEG_5130 MSMEG_5223 MSMEG_5785 MSMEG_6143 MSMEG_6386 MSMEG_6387 MSMEG_6388 MSMEG_6389 MSMEG_6400
0.0133216	7	12	4.20201	Lysine biosynthesis, and Threonine biosynthesis		MSMEG_4955 MSMEG_4956 MSMEG_4957 MSMEG_4958 MSMEG_5121 MSMEG_6256 MSMEG_6257
0.0133216	6	9	4.8023	Aminoacyl-tRNA synthetase, class II	https://www.ebi.ac.uk/interpro/entry/InterPro/IPR006195	MSMEG_2621 MSMEG_2931 MSMEG_3003 MSMEG_4485 MSMEG_6094 MSMEG_6413
0.0133216	7	12	4.20201	tRNA-binding		MSMEG_1398 MSMEG_1399 MSMEG_1443 MSMEG_1467 MSMEG_1521 MSMEG_2931 MSMEG_3777
0.015964	13	35	2.67557	Nucleic acid-binding, OB-fold	https://www.ebi.ac.uk/interpro/entry/InterPro/IPR012340	MSMEG_1398 MSMEG_1439 MSMEG_1445 MSMEG_1519 MSMEG_2656 MSMEG_3003 MSMEG_3035 MSMEG_3777 MSMEG_4954 MSMEG_5696 MSMEG_6094 MSMEG_6159 MSMEG_6896
0.0165061	10	23	3.13193	Secreted		MSMEG_0065 MSMEG_0066 MSMEG_0965 MSMEG_1526 MSMEG_1528 MSMEG_1529 MSMEG_2933 MSMEG_3151 MSMEG_5415 MSMEG_5483
0.0179569	95	500	1.36865	Small molecule biosynthetic process	http://amigo.geneontology.org/amigo/term/GO:0044283	MSMEG_0220 MSMEG_0239 MSMEG_0384 MSMEG_0408 MSMEG_0422 MSMEG_0437 MSMEG_0546 MSMEG_0789 MSMEG_0819 MSMEG_0826 MSMEG_0909 MSMEG_0912 MSMEG_0948 MSMEG_1028 MSMEG_1115 MSMEG_1340 MSMEG_1422 MSMEG_1423 MSMEG_1425 MSMEG_1651 MSMEG_1652 MSMEG_1743 MSMEG_1886 MSMEG_1917 MSMEG_1922 MSMEG_2201 MSMEG_2363 MSMEG_2373 MSMEG_2374 MSMEG_2379 MSMEG_2618 MSMEG_2787 MSMEG_2799 MSMEG_2900 MSMEG_2932 MSMEG_2937 MSM…
0.0238772	7	13	3.87878	Cellular amide catabolic process	http://amigo.geneontology.org/amigo/term/GO:0043605	MSMEG_2658 MSMEG_3625 MSMEG_3626 MSMEG_3627 MSMEG_5727 MSMEG_6087 MSMEG_6194
0.0238772	7	13	3.87878	Universal stress protein A family	https://www.ebi.ac.uk/interpro/entry/InterPro/IPR006015	MSMEG_3936 MSMEG_3939 MSMEG_3940 MSMEG_3945 MSMEG_3950 MSMEG_5245 MSMEG_5733
0.0243016	34	142	1.72477	Cellular amino acid biosynthetic process, and sulfur metabolism		MSMEG_0239 MSMEG_0560 MSMEG_0688 MSMEG_1651 MSMEG_1652 MSMEG_1843 MSMEG_1922 MSMEG_2373 MSMEG_2374 MSMEG_2379 MSMEG_2799 MSMEG_2800 MSMEG_3055 MSMEG_3203 MSMEG_3213 MSMEG_3214 MSMEG_3770 MSMEG_3775 MSMEG_4180 MSMEG_4181 MSMEG_4527 MSMEG_4528 MSMEG_4955 MSMEG_4956 MSMEG_4957 MSMEG_4958 MSMEG_4978 MSMEG_5121 MSMEG_5536 MSMEG_6256 MSMEG_6257 MSMEG_6271 MSMEG_6649 MSMEG_6904
0.024377	112	612	1.31828	Transferase		MSMEG_0001 MSMEG_0014 MSMEG_0028 MSMEG_0030 MSMEG_0246 MSMEG_0311 MSMEG_0384 MSMEG_0390 MSMEG_0392 MSMEG_0422 MSMEG_0688 MSMEG_0782 MSMEG_0789 MSMEG_0821 MSMEG_0830 MSMEG_0886 MSMEG_0913 MSMEG_1008 MSMEG_1026 MSMEG_1050 MSMEG_1115 MSMEG_1119 MSMEG_1351 MSMEG_1482 MSMEG_1484 MSMEG_1524 MSMEG_1568 MSMEG_1633 MSMEG_1650 MSMEG_1651 MSMEG_1701 MSMEG_1888 MSMEG_1918 MSMEG_1920 MSMEG_2350 MSMEG_2365 MSM…
0.0252709	5	7	5.14532	Mixed, incl. polysaccharide pyruvyl transferase, and glycolipid exporter gap/sap		MSMEG_4733 MSMEG_4734 MSMEG_4735 MSMEG_4736 MSMEG_4738
0.0267972	6	10	4.32207	EmbC C-terminal domain, and capsule organization		MSMEG_0909 MSMEG_6386 MSMEG_6387 MSMEG_6388 MSMEG_6389 MSMEG_6400
0.027134	13	37	2.53094	Response to decreased oxygen levels	http://amigo.geneontology.org/amigo/term/GO:0036293	MSMEG_0057 MSMEG_0911 MSMEG_3932 MSMEG_3933 MSMEG_3940 MSMEG_3944 MSMEG_3945 MSMEG_3948 MSMEG_3950 MSMEG_5242 MSMEG_5244 MSMEG_5245 MSMEG_5733
0.027134	13	37	2.53094	Response to oxygen levels	http://amigo.geneontology.org/amigo/term/GO:0070482	MSMEG_0057 MSMEG_0911 MSMEG_3932 MSMEG_3933 MSMEG_3940 MSMEG_3944 MSMEG_3945 MSMEG_3948 MSMEG_3950 MSMEG_5242 MSMEG_5244 MSMEG_5245 MSMEG_5733
0.0284601	21	75	2.01696	Amino-acid biosynthesis		MSMEG_1008 MSMEG_1651 MSMEG_1922 MSMEG_2373 MSMEG_2374 MSMEG_2379 MSMEG_2799 MSMEG_3046 MSMEG_3047 MSMEG_3770 MSMEG_3775 MSMEG_4180 MSMEG_4181 MSMEG_4955 MSMEG_4956 MSMEG_4957 MSMEG_4958 MSMEG_5536 MSMEG_6256 MSMEG_6257 MSMEG_6271
0.029481	16	51	2.2599	Nucleoside monophosphate biosynthetic process, and pyrimidine metabolism		MSMEG_0759 MSMEG_1621 MSMEG_1701 MSMEG_2200 MSMEG_2964 MSMEG_3046 MSMEG_3047 MSMEG_4483 MSMEG_4687 MSMEG_4899 MSMEG_5274 MSMEG_5798 MSMEG_5831 MSMEG_5832 MSMEG_5841 MSMEG_5852
0.029481	12	33	2.61943	Ribonucleoprotein complex	http://amigo.geneontology.org/amigo/term/GO:1990904	MSMEG_1364 MSMEG_1398 MSMEG_1399 MSMEG_1439 MSMEG_1440 MSMEG_1441 MSMEG_1465 MSMEG_1523 MSMEG_2519 MSMEG_3935 MSMEG_5489 MSMEG_6945
0.02981	364	2318	1.13117	Primary metabolic process	http://amigo.geneontology.org/amigo/term/GO:0044238	MSMEG_0001 MSMEG_0005 MSMEG_0006 MSMEG_0014 MSMEG_0024 MSMEG_0028 MSMEG_0030 MSMEG_0202 MSMEG_0220 MSMEG_0233 MSMEG_0239 MSMEG_0246 MSMEG_0337 MSMEG_0384 MSMEG_0390 MSMEG_0392 MSMEG_0408 MSMEG_0409 MSMEG_0437 MSMEG_0456 MSMEG_0457 MSMEG_0485 MSMEG_0502 MSMEG_0560 MSMEG_0580 MSMEG_0624 MSMEG_0678 MSMEG_0725 MSMEG_0752 MSMEG_0759 MSMEG_0765 MSMEG_0777 MSMEG_0790 MSMEG_0819 MSMEG_0821 MSMEG_0886 MSM…
0.0307645	11	29	2.73234	Luciferase-like monooxygenase, and ribitol phosphate metabolic process		MSMEG_0777 MSMEG_1749 MSMEG_2027 MSMEG_2850 MSMEG_3620 MSMEG_5215 MSMEG_5592 MSMEG_5732 MSMEG_5733 MSMEG_6454 MSMEG_6703
0.0308753	84	441	1.37208	External encapsulating structure	http://amigo.geneontology.org/amigo/term/GO:0030312	MSMEG_0061 MSMEG_0064 MSMEG_0081 MSMEG_0108 MSMEG_0202 MSMEG_0384 MSMEG_0752 MSMEG_0777 MSMEG_0821 MSMEG_0912 MSMEG_0948 MSMEG_0956 MSMEG_0965 MSMEG_1028 MSMEG_1322 MSMEG_1428 MSMEG_1524 MSMEG_1527 MSMEG_1528 MSMEG_1529 MSMEG_1540 MSMEG_1813 MSMEG_1870 MSMEG_1929 MSMEG_1930 MSMEG_1954 MSMEG_2048 MSMEG_2351 MSMEG_2352 MSMEG_2364 MSMEG_2373 MSMEG_2692 MSMEG_2920 MSMEG_2933 MSMEG_3053 MSMEG_3146 MSM…
0.0311451	9	21	3.08719	Mixed, incl. protein secretion, and cell adhesion		MSMEG_0055 MSMEG_0057 MSMEG_0061 MSMEG_0062 MSMEG_0063 MSMEG_0064 MSMEG_0065 MSMEG_0066 MSMEG_0076
0.0332032	13	38	2.46434	Lipid metabolism		MSMEG_0220 MSMEG_2692 MSMEG_2933 MSMEG_3150 MSMEG_3151 MSMEG_3948 MSMEG_4325 MSMEG_4326 MSMEG_4727 MSMEG_4756 MSMEG_5130 MSMEG_5242 MSMEG_5835
0.0332032	13	38	2.46434	MlaD protein	http://pfam.xfam.org/family/PF02470	MSMEG_1143 MSMEG_1144 MSMEG_1145 MSMEG_1146 MSMEG_1147 MSMEG_1148 MSMEG_4793 MSMEG_5895 MSMEG_5896 MSMEG_5897 MSMEG_5898 MSMEG_5899 MSMEG_5900
0.0377189	82	432	1.36732	Cell wall	http://amigo.geneontology.org/amigo/term/GO:0005618	MSMEG_0061 MSMEG_0064 MSMEG_0081 MSMEG_0108 MSMEG_0202 MSMEG_0384 MSMEG_0752 MSMEG_0777 MSMEG_0821 MSMEG_0912 MSMEG_0948 MSMEG_0956 MSMEG_0965 MSMEG_1028 MSMEG_1322 MSMEG_1428 MSMEG_1524 MSMEG_1527 MSMEG_1528 MSMEG_1529 MSMEG_1540 MSMEG_1813 MSMEG_1870 MSMEG_1930 MSMEG_1954 MSMEG_2048 MSMEG_2351 MSMEG_2352 MSMEG_2364 MSMEG_2373 MSMEG_2692 MSMEG_2920 MSMEG_2933 MSMEG_3053 MSMEG_3146 MSMEG_3151 MSM…
0.0379007	41	186	1.58786	Transferase activity, transferring acyl groups	http://amigo.geneontology.org/amigo/term/GO:0016746	MSMEG_0233 MSMEG_0390 MSMEG_0408 MSMEG_0409 MSMEG_0830 MSMEG_1322 MSMEG_1651 MSMEG_2900 MSMEG_3150 MSMEG_3151 MSMEG_3187 MSMEG_3189 MSMEG_3490 MSMEG_3513 MSMEG_3775 MSMEG_3901 MSMEG_3933 MSMEG_3948 MSMEG_3951 MSMEG_3953 MSMEG_4325 MSMEG_4327 MSMEG_4513 MSMEG_4727 MSMEG_4728 MSMEG_4757 MSMEG_4920 MSMEG_5199 MSMEG_5221 MSMEG_5242 MSMEG_5612 MSMEG_5616 MSMEG_5672 MSMEG_5783 MSMEG_6143 MSMEG_6230 MSM…
0.0389937	4	5	5.76276	Protein of unknown function DUF3060, and Protein of unknown function DUF3558		MSMEG_1393 MSMEG_1394 MSMEG_1395 MSMEG_1396
0.0389937	4	5	5.76276	Beta-ketoacyl synthase, and Acyl carrier protein (ACP)		MSMEG_4325 MSMEG_4326 MSMEG_4327 MSMEG_4329
0.0389937	4	5	5.76276	Mixed, incl. heme carboxy lyase-like, and heme/flavin dehydrogenase, rv0694		MSMEG_1422 MSMEG_1423 MSMEG_1424 MSMEG_1425
0.0389937	10	26	2.77056	Mixed, incl. dna replication, and exonuclease		MSMEG_0001 MSMEG_1247 MSMEG_1941 MSMEG_1943 MSMEG_2723 MSMEG_3883 MSMEG_4572 MSMEG_5004 MSMEG_6157 MSMEG_6896
0.0389937	4	5	5.76276	TPR repeat, and Chloramphenicol acetyltransferase-like domain superfamily		MSMEG_4729 MSMEG_4730 MSMEG_4731 MSMEG_4732
0.0389937	4	5	5.76276	Mixed, incl. dormancy process, and pyridoxamine 5-phosphate oxidase-related		MSMEG_5242 MSMEG_5243 MSMEG_5244 MSMEG_5245
0.0389937	4	5	5.76276	ABC transporter periplasmic binding domain, and ABC 3 transport family		MSMEG_4557 MSMEG_4559 MSMEG_4560 MSMEG_4561
0.0389937	16	53	2.17462	FMN-binding split barrel, and Luciferase-like monooxygenase		MSMEG_0777 MSMEG_1749 MSMEG_2027 MSMEG_2850 MSMEG_2905 MSMEG_2906 MSMEG_3620 MSMEG_3914 MSMEG_5215 MSMEG_5376 MSMEG_5592 MSMEG_5732 MSMEG_5733 MSMEG_6454 MSMEG_6576 MSMEG_6703
0.0389937	4	5	5.76276	Glutamate biosynthetic process	http://amigo.geneontology.org/amigo/term/GO:0006537	MSMEG_3225 MSMEG_3226 MSMEG_6458 MSMEG_6459
0.0389937	4	5	5.76276	Glutamate synthase activity	http://amigo.geneontology.org/amigo/term/GO:0015930	MSMEG_3225 MSMEG_3226 MSMEG_6458 MSMEG_6459
0.0389937	11	30	2.64126	Ribosomal subunit	http://amigo.geneontology.org/amigo/term/GO:0044391	MSMEG_1364 MSMEG_1398 MSMEG_1399 MSMEG_1439 MSMEG_1440 MSMEG_1441 MSMEG_1465 MSMEG_1523 MSMEG_2519 MSMEG_3935 MSMEG_5489
0.0389937	11	30	2.64126	Pyridine-containing compound metabolic process	http://amigo.geneontology.org/amigo/term/GO:0072524	MSMEG_2693 MSMEG_2937 MSMEG_2939 MSMEG_3199 MSMEG_3200 MSMEG_3201 MSMEG_3512 MSMEG_4975 MSMEG_5136 MSMEG_5243 MSMEG_6576
0.0389937	4	5	5.76276	Translation protein SH3-like domain superfamily	https://www.ebi.ac.uk/interpro/entry/InterPro/IPR008991	MSMEG_1439 MSMEG_1466 MSMEG_2440 MSMEG_3035
0.0389937	4	5	5.76276	DNA topoisomerase, type IIA-like domain superfamily	https://www.ebi.ac.uk/interpro/entry/InterPro/IPR013760	MSMEG_0005 MSMEG_0006 MSMEG_0456 MSMEG_0457
0.0389937	4	5	5.76276	tRNA synthetase class II core domain (G, H, P, S and T)	http://pfam.xfam.org/family/PF00587	MSMEG_2621 MSMEG_2931 MSMEG_4485 MSMEG_6413
0.0389937	4	5	5.76276	Protein of unknown function (DUF3558)	http://pfam.xfam.org/family/PF12079	MSMEG_1395 MSMEG_1396 MSMEG_2645 MSMEG_5007
0.0396914	21	78	1.93939	Lipid transport, and growth of symbiont in host cell		MSMEG_1141 MSMEG_1142 MSMEG_1143 MSMEG_1144 MSMEG_1145 MSMEG_1146 MSMEG_1147 MSMEG_1148 MSMEG_1149 MSMEG_1150 MSMEG_4793 MSMEG_5893 MSMEG_5894 MSMEG_5895 MSMEG_5896 MSMEG_5897 MSMEG_5898 MSMEG_5899 MSMEG_5900 MSMEG_5901 MSMEG_5902
0.0399973	6	11	3.92915	Mixed, incl. peptidyl-tyrosine modification, and mycofactocin-dependent oxidoreductase		MSMEG_1420 MSMEG_1421 MSMEG_1422 MSMEG_1423 MSMEG_1424 MSMEG_1425
0.0399973	6	11	3.92915	Peptide secretion	http://amigo.geneontology.org/amigo/term/GO:0002790	MSMEG_0061 MSMEG_0062 MSMEG_0065 MSMEG_0066 MSMEG_0076 MSMEG_0617
0.0399973	6	11	3.92915	Protein secretion	http://amigo.geneontology.org/amigo/term/GO:0009306	MSMEG_0061 MSMEG_0062 MSMEG_0065 MSMEG_0066 MSMEG_0076 MSMEG_0617
0.0399973	6	11	3.92915	Establishment of protein localization to extracellular region	http://amigo.geneontology.org/amigo/term/GO:0035592	MSMEG_0061 MSMEG_0062 MSMEG_0065 MSMEG_0066 MSMEG_0076 MSMEG_0617
0.0399973	6	11	3.92915	Protein localization to extracellular region	http://amigo.geneontology.org/amigo/term/GO:0071692	MSMEG_0061 MSMEG_0062 MSMEG_0065 MSMEG_0066 MSMEG_0076 MSMEG_0617
0.0408117	437	2850	1.10453	Cellular metabolic process	http://amigo.geneontology.org/amigo/term/GO:0044237	MSMEG_0001 MSMEG_0005 MSMEG_0006 MSMEG_0014 MSMEG_0024 MSMEG_0028 MSMEG_0030 MSMEG_0202 MSMEG_0220 MSMEG_0233 MSMEG_0239 MSMEG_0246 MSMEG_0311 MSMEG_0337 MSMEG_0384 MSMEG_0392 MSMEG_0408 MSMEG_0409 MSMEG_0422 MSMEG_0437 MSMEG_0456 MSMEG_0457 MSMEG_0485 MSMEG_0546 MSMEG_0560 MSMEG_0580 MSMEG_0628 MSMEG_0678 MSMEG_0725 MSMEG_0752 MSMEG_0759 MSMEG_0765 MSMEG_0782 MSMEG_0790 MSMEG_0789 MSMEG_0819 MSM…
0.0416884	12	35	2.46975	Luciferase-like monooxygenase, and coenzyme F420 binding		MSMEG_0777 MSMEG_1749 MSMEG_2027 MSMEG_2850 MSMEG_3620 MSMEG_5215 MSMEG_5592 MSMEG_5732 MSMEG_5733 MSMEG_6454 MSMEG_6576 MSMEG_6703
0.044517	5	8	4.50215	Mixed, incl. amine-lyase activity, and yebc-like		MSMEG_2932 MSMEG_2936 MSMEG_2937 MSMEG_2938 MSMEG_2939
0.0460866	11	31	2.55606	Mixed, incl. glycosyltransferase family 28 n-terminal domain, and methyltransferase domain		MSMEG_0390 MSMEG_0391 MSMEG_0392 MSMEG_0406 MSMEG_0408 MSMEG_0409 MSMEG_0413 MSMEG_4728 MSMEG_4739 MSMEG_4740 MSMEG_4741
Overexpressed under carbone starvation
2.75058e-13	18	21	9.73854	Mixed, incl. protein maturation, and hypf finger		MSMEG_2273 MSMEG_2274 MSMEG_2275 MSMEG_2276 MSMEG_2702 MSMEG_2703 MSMEG_2705 MSMEG_2710 MSMEG_2711 MSMEG_2712 MSMEG_2713 MSMEG_2715 MSMEG_2716 MSMEG_2717 MSMEG_2718 MSMEG_2719 MSMEG_2720 MSMEG_2721
2.52182e-09	13	15	9.84675	Quinone, and ATP synthesis coupled electron transport		MSMEG_2050 MSMEG_2051 MSMEG_2052 MSMEG_2053 MSMEG_2054 MSMEG_2055 MSMEG_2056 MSMEG_2057 MSMEG_2058 MSMEG_2059 MSMEG_2060 MSMEG_2061 MSMEG_2062
6.1105e-09	18	31	6.59708	Mixed, incl. protein maturation, and nitrotoluene degradation		MSMEG_2273 MSMEG_2274 MSMEG_2275 MSMEG_2276 MSMEG_2702 MSMEG_2703 MSMEG_2705 MSMEG_2710 MSMEG_2711 MSMEG_2712 MSMEG_2713 MSMEG_2715 MSMEG_2716 MSMEG_2717 MSMEG_2718 MSMEG_2719 MSMEG_2720 MSMEG_2721
1.58822e-08	32	98	3.70992	Mostly uncharacterized, incl. protein maturation, and oxidoreductase activity, acting on hydrogen as donor		MSMEG_1971 MSMEG_1972 MSMEG_1973 MSMEG_1974 MSMEG_1975 MSMEG_1976 MSMEG_1977 MSMEG_1979 MSMEG_2273 MSMEG_2274 MSMEG_2275 MSMEG_2276 MSMEG_2702 MSMEG_2703 MSMEG_2705 MSMEG_2706 MSMEG_2710 MSMEG_2711 MSMEG_2712 MSMEG_2713 MSMEG_2715 MSMEG_2716 MSMEG_2717 MSMEG_2718 MSMEG_2719 MSMEG_2720 MSMEG_2721 MSMEG_3006 MSMEG_3008 MSMEG_3725 MSMEG_5210 MSMEG_6779
1.77654e-07	10	11	10.3288	Quinone		MSMEG_2050 MSMEG_2053 MSMEG_2054 MSMEG_2055 MSMEG_2056 MSMEG_2057 MSMEG_2058 MSMEG_2060 MSMEG_2061 MSMEG_2062
2.15584e-07	15	26	6.55479	Oxidative phosphorylation		MSMEG_2050 MSMEG_2051 MSMEG_2052 MSMEG_2053 MSMEG_2054 MSMEG_2055 MSMEG_2056 MSMEG_2057 MSMEG_2058 MSMEG_2059 MSMEG_2060 MSMEG_2061 MSMEG_2062 MSMEG_5605 MSMEG_5606
2.36213e-07	18	38	5.38182	Mixed, incl. protein maturation, and oxidoreductase activity, acting on hydrogen as donor		MSMEG_2273 MSMEG_2274 MSMEG_2275 MSMEG_2276 MSMEG_2702 MSMEG_2703 MSMEG_2705 MSMEG_2710 MSMEG_2711 MSMEG_2712 MSMEG_2713 MSMEG_2715 MSMEG_2716 MSMEG_2717 MSMEG_2718 MSMEG_2719 MSMEG_2720 MSMEG_2721
1.11221e-05	7	7	11.3616	Mixed, incl. hypf finger, and hupf/hypc family		MSMEG_2710 MSMEG_2711 MSMEG_2712 MSMEG_2713 MSMEG_2715 MSMEG_2716 MSMEG_2717
1.11221e-05	7	7	11.3616	Mixed, incl. carbon-monoxide dehydrogenase, large subunit, and xdhc- coxi		MSMEG_0744 MSMEG_0745 MSMEG_0746 MSMEG_0747 MSMEG_0748 MSMEG_0749 MSMEG_0751
2.37917e-05	12	23	5.92781	NADH dehydrogenase activity	http://amigo.geneontology.org/amigo/term/GO:0003954	MSMEG_2050 MSMEG_2051 MSMEG_2052 MSMEG_2053 MSMEG_2054 MSMEG_2055 MSMEG_2057 MSMEG_2058 MSMEG_2060 MSMEG_2061 MSMEG_2062 MSMEG_4812
2.37917e-05	14	31	5.13106	Oxidoreductase activity, acting on nad(p)h, quinone or similar compound as acceptor	http://amigo.geneontology.org/amigo/term/GO:0016655	MSMEG_2050 MSMEG_2051 MSMEG_2052 MSMEG_2053 MSMEG_2054 MSMEG_2055 MSMEG_2056 MSMEG_2057 MSMEG_2058 MSMEG_2060 MSMEG_2061 MSMEG_2062 MSMEG_2375 MSMEG_4812
2.37917e-05	12	23	5.92781	NADH dehydrogenase (quinone) activity	http://amigo.geneontology.org/amigo/term/GO:0050136	MSMEG_2050 MSMEG_2051 MSMEG_2052 MSMEG_2053 MSMEG_2054 MSMEG_2055 MSMEG_2057 MSMEG_2058 MSMEG_2060 MSMEG_2061 MSMEG_2062 MSMEG_4812
2.61902e-05	8	10	9.0893	Mixed, incl. methane/phenol/toluene hydroxylase, and mmob/dmpm family		MSMEG_1971 MSMEG_1972 MSMEG_1973 MSMEG_1974 MSMEG_1975 MSMEG_1976 MSMEG_1977 MSMEG_1979
2.61902e-05	10	16	7.10102	Mixed, incl. inositol phosphate metabolism, and periplasmic binding protein		MSMEG_4650 MSMEG_4651 MSMEG_4652 MSMEG_4656 MSMEG_4657 MSMEG_4658 MSMEG_4661 MSMEG_4663 MSMEG_4664 MSMEG_4665
3.59074e-05	18	52	3.93287	Oxidative phosphorylation, and cytochrome-c oxidase activity		MSMEG_2050 MSMEG_2051 MSMEG_2052 MSMEG_2053 MSMEG_2054 MSMEG_2055 MSMEG_2056 MSMEG_2057 MSMEG_2058 MSMEG_2059 MSMEG_2060 MSMEG_2061 MSMEG_2062 MSMEG_2067 MSMEG_4576 MSMEG_4812 MSMEG_5605 MSMEG_5606
4.31193e-05	14	33	4.82009	Quinone binding	http://amigo.geneontology.org/amigo/term/GO:0048038	MSMEG_2050 MSMEG_2051 MSMEG_2052 MSMEG_2053 MSMEG_2054 MSMEG_2055 MSMEG_2056 MSMEG_2057 MSMEG_2058 MSMEG_2059 MSMEG_2060 MSMEG_2061 MSMEG_2062 MSMEG_4812
6.84826e-05	8	11	8.263	Protein maturation, and hydrogenase maturation factor hypb		MSMEG_2273 MSMEG_2274 MSMEG_2275 MSMEG_2276 MSMEG_2702 MSMEG_2703 MSMEG_2705 MSMEG_2721
7.4534e-05	21	72	3.31381	Mixed, incl. carbohydrate transport, and abc transporter, permease		MSMEG_1705 MSMEG_1706 MSMEG_1711 MSMEG_1714 MSMEG_4650 MSMEG_4651 MSMEG_4652 MSMEG_4656 MSMEG_4657 MSMEG_4658 MSMEG_4661 MSMEG_4663 MSMEG_4664 MSMEG_4665 MSMEG_5576 MSMEG_5577 MSMEG_6018 MSMEG_6019 MSMEG_6020 MSMEG_6803 MSMEG_6804
0.000272818	9	16	6.39092	NADH dehydrogenase (ubiquinone) activity	http://amigo.geneontology.org/amigo/term/GO:0008137	MSMEG_2050 MSMEG_2051 MSMEG_2052 MSMEG_2054 MSMEG_2057 MSMEG_2058 MSMEG_2061 MSMEG_2062 MSMEG_4812
0.000299434	171	1426	1.36244	Oxidation-reduction process	http://amigo.geneontology.org/amigo/term/GO:0055114	MSMEG_0214 MSMEG_0301 MSMEG_0327 MSMEG_0328 MSMEG_0358 MSMEG_0414 MSMEG_0415 MSMEG_0514 MSMEG_0530 MSMEG_0590 MSMEG_0684 MSMEG_0685 MSMEG_0686 MSMEG_0743 MSMEG_0744 MSMEG_0745 MSMEG_0746 MSMEG_0747 MSMEG_0762 MSMEG_0811 MSMEG_0900 MSMEG_0964 MSMEG_0968 MSMEG_1112 MSMEG_1129 MSMEG_1132 MSMEG_1167 MSMEG_1213 MSMEG_1296 MSMEG_1496 MSMEG_1497 MSMEG_1668 MSMEG_1693 MSMEG_1761 MSMEG_1760 MSMEG_1762 MSM…
0.000493565	9	17	6.01498	Mixed, incl. methane/phenol/toluene hydroxylase, and transcription factor binding		MSMEG_1971 MSMEG_1972 MSMEG_1973 MSMEG_1974 MSMEG_1975 MSMEG_1976 MSMEG_1977 MSMEG_1979 MSMEG_5210
0.000565356	5	5	11.3616	Methane/phenol/toluene hydroxylase, and MmoB/DmpM family		MSMEG_1971 MSMEG_1972 MSMEG_1973 MSMEG_1974 MSMEG_1977
0.000565356	5	5	11.3616	Nitrate assimilation		MSMEG_5137 MSMEG_5138 MSMEG_5139 MSMEG_5140 MSMEG_5141
0.000565356	5	5	11.3616	Mixed, incl. maltose transport, and putative sugar-binding domain		MSMEG_5571 MSMEG_5572 MSMEG_5573 MSMEG_5574 MSMEG_5575
0.000565356	5	5	11.3616	Histidine metabolism, and Formiminoglutamate deiminase		MSMEG_1179 MSMEG_1180 MSMEG_1181 MSMEG_1182 MSMEG_1183
0.000634211	10	22	5.16438	Mostly uncharacterized, incl. methane/phenol/toluene hydroxylase, and transcription factor binding		MSMEG_1971 MSMEG_1972 MSMEG_1973 MSMEG_1974 MSMEG_1975 MSMEG_1976 MSMEG_1977 MSMEG_1979 MSMEG_5210 MSMEG_6779
0.000634211	23	96	2.72206	Mixed, incl. aldehyde dehydrogenase domain, and amp-binding enzyme		MSMEG_0900 MSMEG_0901 MSMEG_1496 MSMEG_1497 MSMEG_1760 MSMEG_1762 MSMEG_1764 MSMEG_2035 MSMEG_2241 MSMEG_2487 MSMEG_2488 MSMEG_2597 MSMEG_2959 MSMEG_3007 MSMEG_3615 MSMEG_5538 MSMEG_5826 MSMEG_5859 MSMEG_5908 MSMEG_5942 MSMEG_5945 MSMEG_6314 MSMEG_6687
0.000634211	8	14	6.49236	Mixed, incl. fatty acid beta-oxidation using acyl-coa dehydrogenase, and duf35 ob-fold domain, acyl-coa-associated		MSMEG_5919 MSMEG_5922 MSMEG_5923 MSMEG_5990 MSMEG_5992 MSMEG_5993 MSMEG_5994 MSMEG_6041
0.000676369	9	18	5.68081	Mixed, incl. xdhc- coxi, and carbon monoxide dehydrogenase subunit g		MSMEG_0743 MSMEG_0744 MSMEG_0745 MSMEG_0746 MSMEG_0747 MSMEG_0748 MSMEG_0749 MSMEG_0751 MSMEG_5875
0.000732456	154	1281	1.36588	Oxidoreductase activity	http://amigo.geneontology.org/amigo/term/GO:0016491	MSMEG_0214 MSMEG_0301 MSMEG_0327 MSMEG_0328 MSMEG_0358 MSMEG_0414 MSMEG_0415 MSMEG_0514 MSMEG_0530 MSMEG_0590 MSMEG_0684 MSMEG_0685 MSMEG_0686 MSMEG_0744 MSMEG_0745 MSMEG_0746 MSMEG_0762 MSMEG_0811 MSMEG_0900 MSMEG_0964 MSMEG_0968 MSMEG_1129 MSMEG_1132 MSMEG_1167 MSMEG_1213 MSMEG_1296 MSMEG_1496 MSMEG_1497 MSMEG_1668 MSMEG_1693 MSMEG_1761 MSMEG_1760 MSMEG_1762 MSMEG_1768 MSMEG_1775 MSMEG_1782 MSM…
0.000870666	21	85	2.80699	Mixed, incl. aldehyde dehydrogenase domain, and amp-dependent synthetase/ligase		MSMEG_0900 MSMEG_0901 MSMEG_1496 MSMEG_1497 MSMEG_1760 MSMEG_1762 MSMEG_1764 MSMEG_2035 MSMEG_2241 MSMEG_2487 MSMEG_2488 MSMEG_2597 MSMEG_2959 MSMEG_3007 MSMEG_3615 MSMEG_5538 MSMEG_5826 MSMEG_5859 MSMEG_5908 MSMEG_6314 MSMEG_6687
0.00326811	11	31	4.03155	Mostly uncharacterized, incl. carotenoid biosynthetic process, and stas domain		MSMEG_1801 MSMEG_2343 MSMEG_2344 MSMEG_2346 MSMEG_2347 MSMEG_2353 MSMEG_2354 MSMEG_5400 MSMEG_5401 MSMEG_5402 MSMEG_5543
0.00326811	17	66	2.92648	Oxidoreductase activity, acting on nad(p)h	http://amigo.geneontology.org/amigo/term/GO:0016651	MSMEG_2050 MSMEG_2051 MSMEG_2052 MSMEG_2053 MSMEG_2054 MSMEG_2055 MSMEG_2056 MSMEG_2057 MSMEG_2058 MSMEG_2060 MSMEG_2061 MSMEG_2062 MSMEG_2375 MSMEG_3594 MSMEG_4812 MSMEG_5319 MSMEG_6536
0.00394097	29	152	2.16768	Carbohydrate metabolic process, and carbohydrate transport		MSMEG_1358 MSMEG_1360 MSMEG_1361 MSMEG_1705 MSMEG_1706 MSMEG_1711 MSMEG_1714 MSMEG_3673 MSMEG_4650 MSMEG_4651 MSMEG_4652 MSMEG_4656 MSMEG_4657 MSMEG_4658 MSMEG_4661 MSMEG_4663 MSMEG_4664 MSMEG_4665 MSMEG_4888 MSMEG_4916 MSMEG_5144 MSMEG_5576 MSMEG_5577 MSMEG_5986 MSMEG_6018 MSMEG_6019 MSMEG_6020 MSMEG_6803 MSMEG_6804
0.00423859	18	74	2.76364	NAD		MSMEG_0514 MSMEG_1179 MSMEG_1496 MSMEG_1971 MSMEG_1973 MSMEG_2050 MSMEG_2053 MSMEG_2054 MSMEG_2055 MSMEG_2056 MSMEG_2057 MSMEG_2058 MSMEG_2060 MSMEG_2061 MSMEG_2062 MSMEG_2598 MSMEG_2659 MSMEG_5656
0.00451783	77	569	1.53751	Oxidoreductase		MSMEG_0301 MSMEG_0358 MSMEG_0414 MSMEG_0590 MSMEG_0744 MSMEG_0746 MSMEG_0762 MSMEG_0900 MSMEG_1132 MSMEG_1167 MSMEG_1213 MSMEG_1296 MSMEG_1496 MSMEG_1497 MSMEG_1693 MSMEG_1762 MSMEG_1775 MSMEG_1906 MSMEG_1908 MSMEG_1911 MSMEG_1971 MSMEG_1972 MSMEG_1973 MSMEG_1979 MSMEG_1980 MSMEG_1991 MSMEG_2035 MSMEG_2050 MSMEG_2051 MSMEG_2052 MSMEG_2057 MSMEG_2058 MSMEG_2059 MSMEG_2070 MSMEG_2208 MSMEG_2347 MSM…
0.00517539	15	56	3.04329	Mixed, incl. glycolysis / gluconeogenesis, and aldehyde dehydrogenase domain		MSMEG_0900 MSMEG_0901 MSMEG_1496 MSMEG_1497 MSMEG_2035 MSMEG_2487 MSMEG_2488 MSMEG_2959 MSMEG_3007 MSMEG_3615 MSMEG_5538 MSMEG_5826 MSMEG_5859 MSMEG_6314 MSMEG_6687
0.00599087	7	14	5.68081	Mixed, incl. fluorobenzoate degradation, and beta-ketoadipate pathway		MSMEG_1901 MSMEG_1906 MSMEG_1908 MSMEG_1909 MSMEG_1910 MSMEG_1911 MSMEG_1912
0.00664475	32	181	2.00869	Carbon metabolism, and Oxidative phosphorylation		MSMEG_0301 MSMEG_1112 MSMEG_1693 MSMEG_1846 MSMEG_1847 MSMEG_2050 MSMEG_2051 MSMEG_2052 MSMEG_2053 MSMEG_2054 MSMEG_2055 MSMEG_2056 MSMEG_2057 MSMEG_2058 MSMEG_2059 MSMEG_2060 MSMEG_2061 MSMEG_2062 MSMEG_2067 MSMEG_3706 MSMEG_4075 MSMEG_4576 MSMEG_4653 MSMEG_4710 MSMEG_4711 MSMEG_4712 MSMEG_4812 MSMEG_5037 MSMEG_5605 MSMEG_5606 MSMEG_5796 MSMEG_6787
0.00673356	5	7	8.11545	Fluorobenzoate degradation, and beta-ketoadipate pathway		MSMEG_1906 MSMEG_1908 MSMEG_1910 MSMEG_1911 MSMEG_1912
0.00776581	10	29	3.9178	Mixed, incl. carbon monoxide dehydrogenase subunit g, and co dehydrogenase flavoprotein, c-terminal		MSMEG_0743 MSMEG_0744 MSMEG_0745 MSMEG_0746 MSMEG_0747 MSMEG_0748 MSMEG_0749 MSMEG_0751 MSMEG_2463 MSMEG_5875
0.00971153	13	47	3.14258	Mixed, incl. periplasmic space, and carbon monoxide dehydrogenase subunit g		MSMEG_0743 MSMEG_0744 MSMEG_0745 MSMEG_0746 MSMEG_0747 MSMEG_0748 MSMEG_0749 MSMEG_0751 MSMEG_2463 MSMEG_2945 MSMEG_2952 MSMEG_2954 MSMEG_5875
0.0147749	13	49	3.01431	Mostly uncharacterized, incl. peptidyl-tyrosine modification, and transcription factor binding		MSMEG_1971 MSMEG_1972 MSMEG_1973 MSMEG_1974 MSMEG_1975 MSMEG_1976 MSMEG_1977 MSMEG_1979 MSMEG_3006 MSMEG_3008 MSMEG_3725 MSMEG_5210 MSMEG_6779
0.0150278	4	5	9.0893	Mixed, incl. hydrogenase nickel incorporation protein hypa/hybf, conserved site, and hypd, domain 2		MSMEG_2702 MSMEG_2703 MSMEG_2705 MSMEG_2721
0.0150278	4	5	9.0893	Mixed, incl. ornithine aminotransferase, and dimethylargininase activity		MSMEG_1411 MSMEG_1412 MSMEG_1413 MSMEG_1414
0.0150278	4	5	9.0893	Mixed, incl. csbd-like		MSMEG_3327 MSMEG_3329 MSMEG_3330 MSMEG_3331
0.0150278	4	5	9.0893	Fatty acid beta-oxidation using acyl-coa dehydrogenase, and duf35 ob-fold domain, acyl-coa-associated		MSMEG_5990 MSMEG_5992 MSMEG_5993 MSMEG_5994
0.0150278	6	12	5.68081	Mixed, incl. carotenoid biosynthesis, and trna methyl transferase		MSMEG_2343 MSMEG_2344 MSMEG_2346 MSMEG_2347 MSMEG_2353 MSMEG_2354
0.0150278	4	5	9.0893	Carotenoid biosynthesis, and plastid envelope		MSMEG_2343 MSMEG_2344 MSMEG_2346 MSMEG_2347
0.0150278	4	5	9.0893	Mixed, incl. rhamnulokinase, and rhamnose metabolism		MSMEG_0588 MSMEG_0589 MSMEG_0590 MSMEG_0591
0.0150278	4	5	9.0893	Nitrate metabolic process	http://amigo.geneontology.org/amigo/term/GO:0042126	MSMEG_5137 MSMEG_5138 MSMEG_5140 MSMEG_5141
0.0150278	4	5	9.0893	Reactive nitrogen species metabolic process	http://amigo.geneontology.org/amigo/term/GO:2001057	MSMEG_5137 MSMEG_5138 MSMEG_5140 MSMEG_5141
0.0150278	4	5	9.0893	Amine oxidase	https://www.ebi.ac.uk/interpro/entry/InterPro/IPR002937	MSMEG_2035 MSMEG_2344 MSMEG_2347 MSMEG_5400
0.0156994	12	44	3.09863	Aldehyde/histidinol dehydrogenase	https://www.ebi.ac.uk/interpro/entry/InterPro/IPR016161	MSMEG_0327 MSMEG_0900 MSMEG_1762 MSMEG_2488 MSMEG_2597 MSMEG_3007 MSMEG_3304 MSMEG_5119 MSMEG_5538 MSMEG_5656 MSMEG_5859 MSMEG_6687
0.0171649	9	27	3.78721	Mostly uncharacterized, incl. s4 domain, and cellular response to acidic ph		MSMEG_1780 MSMEG_1781 MSMEG_1782 MSMEG_1787 MSMEG_2376 MSMEG_3311 MSMEG_3312 MSMEG_6615 MSMEG_6616
0.0171649	19	92	2.34642	Mixed, incl. periplasmic space, and purine nucleobase metabolic process		MSMEG_0684 MSMEG_0685 MSMEG_0686 MSMEG_0743 MSMEG_0744 MSMEG_0745 MSMEG_0746 MSMEG_0747 MSMEG_0748 MSMEG_0749 MSMEG_0751 MSMEG_1295 MSMEG_1296 MSMEG_2463 MSMEG_2945 MSMEG_2952 MSMEG_2954 MSMEG_5722 MSMEG_5875
0.0176211	7	17	4.67832	Respiratory electron transport chain	http://amigo.geneontology.org/amigo/term/GO:0022904	MSMEG_2050 MSMEG_2051 MSMEG_2052 MSMEG_2053 MSMEG_2057 MSMEG_2059 MSMEG_5605
0.0185941	32	195	1.86447	Flavin adenine dinucleotide binding	http://amigo.geneontology.org/amigo/term/GO:0050660	MSMEG_0301 MSMEG_0685 MSMEG_0744 MSMEG_1132 MSMEG_1497 MSMEG_1693 MSMEG_1980 MSMEG_1991 MSMEG_2070 MSMEG_2208 MSMEG_2375 MSMEG_2463 MSMEG_2492 MSMEG_2567 MSMEG_2884 MSMEG_3444 MSMEG_3594 MSMEG_3637 MSMEG_3638 MSMEG_4874 MSMEG_4875 MSMEG_5037 MSMEG_5117 MSMEG_5267 MSMEG_5297 MSMEG_5906 MSMEG_5907 MSMEG_5967 MSMEG_5993 MSMEG_5994 MSMEG_6041 MSMEG_6686
0.01979	26	147	2.00954	Generation of precursor metabolites and energy, and oxidative phosphorylation		MSMEG_1112 MSMEG_1693 MSMEG_2050 MSMEG_2051 MSMEG_2052 MSMEG_2053 MSMEG_2054 MSMEG_2055 MSMEG_2056 MSMEG_2057 MSMEG_2058 MSMEG_2059 MSMEG_2060 MSMEG_2061 MSMEG_2062 MSMEG_2067 MSMEG_4075 MSMEG_4576 MSMEG_4710 MSMEG_4711 MSMEG_4712 MSMEG_4812 MSMEG_5605 MSMEG_5606 MSMEG_5796 MSMEG_6787
0.0214976	9	28	3.65195	Mixed, incl. cholesterol metabolic process, and duf35 ob-fold domain, acyl-coa-associated		MSMEG_5914 MSMEG_5919 MSMEG_5922 MSMEG_5923 MSMEG_5990 MSMEG_5992 MSMEG_5993 MSMEG_5994 MSMEG_6041
0.021535	6	13	5.24383	Flavin containing amine oxidoreductase	http://pfam.xfam.org/family/PF01593	MSMEG_2035 MSMEG_2344 MSMEG_2347 MSMEG_2884 MSMEG_3594 MSMEG_5400
0.0220798	11	40	3.12445	Mixed, incl. aldehyde dehydrogenase domain, and acetyl-coa metabolic process		MSMEG_0900 MSMEG_0901 MSMEG_1496 MSMEG_1497 MSMEG_2487 MSMEG_2488 MSMEG_2959 MSMEG_3007 MSMEG_5538 MSMEG_5826 MSMEG_6687
0.0220798	16	73	2.49022	Oxidoreductase activity, acting on the aldehyde or oxo group of donors	http://amigo.geneontology.org/amigo/term/GO:0016903	MSMEG_0327 MSMEG_0745 MSMEG_0900 MSMEG_1762 MSMEG_1817 MSMEG_2488 MSMEG_2597 MSMEG_3007 MSMEG_3304 MSMEG_4711 MSMEG_4712 MSMEG_5119 MSMEG_5538 MSMEG_5859 MSMEG_5967 MSMEG_6687
0.0220798	5	9	6.31202	ATP synthesis coupled electron transport	http://amigo.geneontology.org/amigo/term/GO:0042773	MSMEG_2050 MSMEG_2051 MSMEG_2052 MSMEG_2053 MSMEG_2057
0.0256638	11	41	3.04824	Aldehyde dehydrogenase domain	https://www.ebi.ac.uk/interpro/entry/InterPro/IPR015590	MSMEG_0327 MSMEG_0900 MSMEG_1762 MSMEG_2488 MSMEG_2597 MSMEG_3007 MSMEG_3304 MSMEG_5119 MSMEG_5538 MSMEG_5859 MSMEG_6687
0.0256638	11	41	3.04824	Aldehyde dehydrogenase, N-terminal	https://www.ebi.ac.uk/interpro/entry/InterPro/IPR016162	MSMEG_0327 MSMEG_0900 MSMEG_1762 MSMEG_2488 MSMEG_2597 MSMEG_3007 MSMEG_3304 MSMEG_5119 MSMEG_5538 MSMEG_5859 MSMEG_6687
0.0256638	11	41	3.04824	Aldehyde dehydrogenase, C-terminal	https://www.ebi.ac.uk/interpro/entry/InterPro/IPR016163	MSMEG_0327 MSMEG_0900 MSMEG_1762 MSMEG_2488 MSMEG_2597 MSMEG_3007 MSMEG_3304 MSMEG_5119 MSMEG_5538 MSMEG_5859 MSMEG_6687
0.0256638	9	29	3.52602	Translocase		MSMEG_2050 MSMEG_2053 MSMEG_2055 MSMEG_2056 MSMEG_2057 MSMEG_2060 MSMEG_2061 MSMEG_2062 MSMEG_3281
0.0256638	11	41	3.04824	Aldehyde dehydrogenase family	http://pfam.xfam.org/family/PF00171	MSMEG_0327 MSMEG_0900 MSMEG_1762 MSMEG_2488 MSMEG_2597 MSMEG_3007 MSMEG_3304 MSMEG_5119 MSMEG_5538 MSMEG_5859 MSMEG_6687
0.0269072	3	3	11.3616	Carbon dioxide binding	http://amigo.geneontology.org/amigo/term/GO:1902670	MSMEG_2274 MSMEG_2703 MSMEG_2712
0.0269072	3	3	11.3616	Hydrogenase expression/formation protein, HupF/HypC	https://www.ebi.ac.uk/interpro/entry/InterPro/IPR001109	MSMEG_2274 MSMEG_2703 MSMEG_2712
0.0269072	3	3	11.3616	Hydrogenase assembly chaperone, conserved site	https://www.ebi.ac.uk/interpro/entry/InterPro/IPR019812	MSMEG_2274 MSMEG_2703 MSMEG_2712
0.0269072	3	3	11.3616	Histidine metabolism		MSMEG_1179 MSMEG_1182 MSMEG_1183
0.0269072	3	3	11.3616	HupF/HypC family	http://pfam.xfam.org/family/PF01455	MSMEG_2274 MSMEG_2703 MSMEG_2712
0.029887	4	6	7.57442	Mixed, incl. hypf finger, and hypd, domain 2		MSMEG_2273 MSMEG_2274 MSMEG_2275 MSMEG_2276
0.029887	4	6	7.57442	Inositol catabolic process, and 5-dehydro-2-deoxygluconokinase		MSMEG_4661 MSMEG_4663 MSMEG_4664 MSMEG_4665
0.0299359	14	62	2.56553	Cellular amino acid catabolic process	http://amigo.geneontology.org/amigo/term/GO:0009063	MSMEG_1179 MSMEG_1182 MSMEG_1183 MSMEG_1496 MSMEG_1764 MSMEG_2487 MSMEG_2659 MSMEG_2914 MSMEG_2959 MSMEG_4048 MSMEG_4711 MSMEG_5021 MSMEG_5117 MSMEG_5796
0.0413692	7	20	3.97657	FAD-binding, type PCMH, subdomain 2	https://www.ebi.ac.uk/interpro/entry/InterPro/IPR016169	MSMEG_0301 MSMEG_0685 MSMEG_0744 MSMEG_2463 MSMEG_2492 MSMEG_3637 MSMEG_5037
0.0413692	7	20	3.97657	FAD-binding, type PCMH-like superfamily	https://www.ebi.ac.uk/interpro/entry/InterPro/IPR036318	MSMEG_0301 MSMEG_0685 MSMEG_0744 MSMEG_2463 MSMEG_2492 MSMEG_3637 MSMEG_5037
0.0475138	8	26	3.49589	Degradation of aromatic compounds, and Peptidase M15B		MSMEG_1901 MSMEG_1906 MSMEG_1908 MSMEG_1909 MSMEG_1910 MSMEG_1911 MSMEG_1912 MSMEG_6536
